# Supplementary material for: Sequence characterization of eccDNA content in multiple blackgrass (Alopecurus myosuroides) populations
Source: Preprints.org preprint supplement (doi:10.20944/preprints202309.1384.v1), 2023-09-20
Supplement: Supplementary file 1 [file supplementary]

## Sheet: S1
Supplementary Table 1. Summary and charaterization of eccDNAs detected in multiple herbicide resistant blackgrass populations
Sample_ID	Category	Predicted_eccDNA	Size	Feature	tRNA #	tRNA_start	tRNA_end	AA	NT	gene_start	gene_end	gene_orientation	gene_ID	pfam	pfam	Uniprot	homologous blackgrass gene	TR/TF	DGE
CC2R	Resistant	m64023e_220409_165810_100074173_ccs01	11509	gene						9191	10234	-	CC2R_00000577	PF07893	Protein of unknown function (DUF1668)		ALOMY0G47413
CC2R	Resistant	m64023e_220409_165810_100140541_ccs	13670	gene						6255	8187	-	CC2R_00000312				ALOMY5G32141
CC2R	Resistant	m64023e_220409_165810_100140541_ccs	13670	gene						8603	9483	-	CC2R_00000313				ALOMY5G32141
CC2R	Resistant	m64023e_220409_165810_100335746_ccs	9902	gene						617	2805	+	CC2R_00000798				ALOMY1G02741
CC2R	Resistant	m64023e_220409_165810_100534930_ccs	6007	gene						1115	2504	+	CC2R_00001211	PF01967	MoaC family	sp|Q39056|CNX3_ARATH	ALOMY3G13305
CC2R	Resistant	m64023e_220409_165810_100731627_ccs0	1920	gene						647	814	-	CC2R_00001515	PF00420	NADH-ubiquinone/plastoquinone oxidoreductase chain 4L	sp|P69379|NU4LC_WHEAT	ALOMY0G47038
CC2R	Resistant	m64023e_220409_165810_100731627_ccs01	1950	gene						162	329	-	CC2R_00001513	PF00420	NADH-ubiquinone/plastoquinone oxidoreductase chain 4L	sp|P69379|NU4LC_WHEAT	ALOMY0G47038
CC2R	Resistant	m64023e_220409_165810_100860740_ccs	8506	gene						3580	5237	+	CC2R_00000947				ALOMY5G32354
CC2R	Resistant	m64023e_220409_165810_10095060_ccs	8407	gene						5873	8400	+	CC2R_00000962	PF04195	Putative gypsy type transposon		ALOMY2G20844
CC2R	Resistant	m64023e_220409_165810_101057566_ccs	8292	gene						4423	6886	-	CC2R_00000975	PF03478	Protein of unknown function (DUF295)		ALOMY2G18370
CC2R	Resistant	m64023e_220409_165810_101123812_ccs	10498	gene						4931	8085	-	CC2R_00000729	PF04195	Putative gypsy type transposon		ALOMY2G20844
CC2R	Resistant	m64023e_220409_165810_101124429_ccs	18106	gene						5322	5753	-	CC2R_00000084				ALOMY5G31918
CC2R	Resistant	m64023e_220409_165810_101189800_ccs	9978	gene						654	3516	+	CC2R_00000789	PF16639	Apocytochrome F, N-terminal	sp|A1EA21|CYF_AGRST	ALOMY0G46730
CC2R	Resistant	m64023e_220409_165810_101189800_ccs	9978	gene						4355	4894	-	CC2R_00000790	PF00283	Cytochrome b559, alpha (gene psbE) and beta (gene psbF)subunits	sp|Q5SD42|PSBF_HUPLU	ALOMY0G47274
CC2R	Resistant	m64023e_220409_165810_101318813_ccs	4979	gene						2455	3147	+	CC2R_00001287				ALOMY2G23101
CC2R	Resistant	m64023e_220409_165810_101516926_ccs	7703	gene						1900	2781	+	CC2R_00001043	PF00646	F-box domain	sp|Q9FZ70|FDL1_ARATH	ALOMY1G03207
CC2R	Resistant	m64023e_220409_165810_10159613_ccs	12570	gene						8652	12536	+	CC2R_00000439				ALOMY7G37279
CC2R	Resistant	m64023e_220409_165810_101647515_ccs	8327	gene						169	1836	-	CC2R_00000966	PF14226	non-haem dioxygenase in morphine synthesis N-terminal	sp|Q94LP4|ODD11_ORYSJ	ALOMY5G34267
CC2R	Resistant	m64023e_220409_165810_101647515_ccs	8327	gene						2767	8296	-	CC2R_00000967	PF05641	Agenet domain		ALOMY5G34266
CC2R	Resistant	m64023e_220409_165810_101843989_ccs	3300	gene						1676	3236	-	CC2R_00001429	PF00318	Ribosomal protein S2	sp|A1EA01|RR2_AGRST	ALOMY0G46723
CC2R	Resistant	m64023e_220409_165810_101845736_ccs	11790	gene						1196	4164	+	CC2R_00000539	PF04195	Putative gypsy type transposon		ALOMY2G20844
CC2R	Resistant	m64023e_220409_165810_101974401_ccs	3894	gene						346	3140	-	CC2R_00001393	PF03360	Glycosyltransferase family 43	sp|Q6AT32|GT43E_ORYSJ	ALOMY5G32115
CC2R	Resistant	m64023e_220409_165810_101974401_ccs	3894	gene						3194	3862	-	CC2R_00001394
CC2R	Resistant	m64023e_220409_165810_102173530_ccs01	2813	gene						37	1473	+	CC2R_00001456	PF00223	Photosystem I psaA/psaB protein	sp|P58311|PSAA_WHEAT	ALOMY0G46726
CC2R	Resistant	m64023e_220409_165810_102173530_ccs01	2813	gene						1502	2377	+	CC2R_00001457	PF00223	Photosystem I psaA/psaB protein	sp|Q68S07|PSAB_PANGI	ALOMY0G46725
CC2R	Resistant	m64023e_220409_165810_102498766_ccs	4620	gene						1834	2923	-	CC2R_00001323				ALOMY6G46337
CC2R	Resistant	m64023e_220409_165810_102498766_ccs	4620	gene						2947	3386	-	CC2R_00001324				ALOMY6G46337
CC2R	Resistant	m64023e_220409_165810_102564551_ccs01	11478	gene						6207	10038	+	CC2R_00000580				ALOMY5G32354
CC2R	Resistant	m64023e_220409_165810_102630989_ccs	4728	gene						1209	1280	+	CC2R_00001313
CC2R	Resistant	m64023e_220409_165810_102631912_ccs	14610	gene						8805	9053	+	CC2R_00000241				ALOMY6G42914
CC2R	Resistant	m64023e_220409_165810_102891637_ccs	10904	gene						6946	7587	+	CC2R_00000667	PF04859	Plant protein of unknown function (DUF641)		ALOMY2G20491
CC2R	Resistant	m64023e_220409_165810_102891637_ccs	10904	gene						8653	9495	-	CC2R_00000668				ALOMY2G20490
CC2R	Resistant	m64023e_220409_165810_103089981_ccs	12060	gene						2739	2992	-	CC2R_00000520				ALOMY6G42914
CC2R	Resistant	m64023e_220409_165810_103154222_ccs	10290	gene						5782	6030	+	CC2R_00000745				ALOMY6G42914
CC2R	Resistant	m64023e_220409_165810_103220347_ccs	4140	gene						65	1689	-	CC2R_00001370	PF00124	Photosynthetic reaction centre protein	sp|P11849|PSBD_HORVU	ALOMY2G18054
CC2R	Resistant	m64023e_220409_165810_103220347_ccs	4140	gene						1937	4097	-	CC2R_00001371	PF00421	Photosystem II protein	sp|P11095|PSBC_HORVU	ALOMY0G46722
CC2R	Resistant	m64023e_220409_165810_103351914_ccs	11661	gene						2174	5293	-	CC2R_00000549	PF04195	Putative gypsy type transposon		ALOMY2G20844
CC2R	Resistant	m64023e_220409_165810_103484093_ccs	10140	gene						726	974	-	CC2R_00000766				ALOMY6G42914
CC2R	Resistant	m64023e_220409_165810_103680362_ccs	10080	gene						448	3127	-	CC2R_00000778				ALOMY1G05155
CC2R	Resistant	m64023e_220409_165810_103680362_ccs	10080	gene						8278	9115	-	CC2R_00000779				ALOMY5G31564
CC2R	Resistant	m64023e_220409_165810_103875162_ccs	5460	gene						953	5088	+	CC2R_00001251	PF00006	ATP synthase alpha/beta family, nucleotide-binding domain	sp|A8Y9G7|ATPA_LOLPR	ALOMY0G46724
CC2R	Resistant	m64023e_220409_165810_104202559_ccs	18131	gene						9174	10850	+	CC2R_00000082				ALOMY6G42349
CC2R	Resistant	m64023e_220409_165810_104202559_ccs	18131	gene						12171	14630	+	CC2R_00000083				ALOMY5G32141
CC2R	Resistant	m64023e_220409_165810_10422514_ccs	4838	gene						1353	1508	+	CC2R_00001304				ALOMY2G22418
CC2R	Resistant	m64023e_220409_165810_10422871_ccs	15390	gene						11674	14878	+	CC2R_00000194				ALOMY0G47344
CC2R	Resistant	m64023e_220409_165810_10486978_ccs	9922	gene						1212	1461	+	CC2R_00000793				ALOMY6G42914
CC2R	Resistant	m64023e_220409_165810_105187662_ccs0	14280	gene						601	4139	-	CC2R_00000258				ALOMY5G32141
CC2R	Resistant	m64023e_220409_165810_105448327_ccs	9450	gene						1349	2986	-	CC2R_00000857				ALOMY4G26762
CC2R	Resistant	m64023e_220409_165810_105449073_ccs	2220	gene						139	1124	+	CC2R_00001503	PF06839	GRF zinc finger		ALOMY5G32862
CC2R	Resistant	m64023e_220409_165810_105775635_ccs	14430	gene						53	619	+	CC2R_00000243	PF00361	Proton-conducting membrane transporter	sp|P58420|NU4C_WHEAT	ALOMY0G47050
CC2R	Resistant	m64023e_220409_165810_105775635_ccs	14430	gene						1030	4561	+	CC2R_00000244	PF00662	NADH-Ubiquinone oxidoreductase (complex I), chain 5 N-terminus	sp|A8Y9D4|NU5C_LOLPR	ALOMY0G47048
CC2R	Resistant	m64023e_220409_165810_105775635_ccs	14430	gene						4600	7341	+	CC2R_00000245	PF01010	NADH-dehyrogenase subunit F, TMs, (complex I) C-terminus	sp|A1EA56|NU5C_AGRST	ALOMY0G47048
CC2R	Resistant	m64023e_220409_165810_105775635_ccs	14430	gene						7622	13140	+	CC2R_00000246	PF00346	Respiratory-chain NADH dehydrogenase, 49 Kd subunit	sp|P0C337|NDHH_ORYSJ	ALOMY0G47042
CC2R	Resistant	m64023e_220409_165810_105775635_ccs	14430	gene						13527	14413	+	CC2R_00000247	PF00361	Proton-conducting membrane transporter	sp|P58420|NU4C_WHEAT	ALOMY0G47050
CC2R	Resistant	m64023e_220409_165810_106302201_ccs	6720	gene						4283	5402	+	CC2R_00001157	PF06839	GRF zinc finger		ALOMY5G32862
CC2R	Resistant	m64023e_220409_165810_106629388_ccs	2549	gene						77	1360	+	CC2R_00001480			sp|Q39214|RPM1_ARATH	ALOMY5G32379
CC2R	Resistant	m64023e_220409_165810_106629388_ccs	2549	gene						2012	2369	+	CC2R_00001481	PF00931	NB-ARC domain	sp|Q39214|RPM1_ARATH	ALOMY5G32379
CC2R	Resistant	m64023e_220409_165810_106693485_ccs	14310	gene						1180	4284	+	CC2R_00000254	PF04195	Putative gypsy type transposon		ALOMY2G20844
CC2R	Resistant	m64023e_220409_165810_106693742_ccs	10350	gene						456	617	+	CC2R_00000740
CC2R	Resistant	m64023e_220409_165810_106758368_ccs	8436	gene						6175	7377	+	CC2R_00000959	PF04195	Putative gypsy type transposon		ALOMY2G20844
CC2R	Resistant	m64023e_220409_165810_106758368_ccs	8436	gene						7417	8368	+	CC2R_00000960				ALOMY2G20844
CC2R	Resistant	m64023e_220409_165810_106758658_ccs	11400	gene						6172	6421	+	CC2R_00000589				ALOMY6G42914
CC2R	Resistant	m64023e_220409_165810_106824967_ccs01	13421	gene						9041	9709	-	CC2R_00000341				ALOMY5G31918
CC2R	Resistant	m64023e_220409_165810_10683056_ccs	7950	gene						670	3796	+	CC2R_00001014				ALOMY6G44839
CC2R	Resistant	m64023e_220409_165810_106956820_ccs	15614	gene						13357	13811	-	CC2R_00000185				ALOMY1G00446
CC2R	Resistant	m64023e_220409_165810_106957055_ccs	4829	gene						2344	4824	+	CC2R_00001308	PF04195	Putative gypsy type transposon		ALOMY2G20844
CC2R	Resistant	m64023e_220409_165810_107348543_ccs	13149	gene						8093	8475	-	CC2R_00000367				ALOMY2G20844
CC2R	Resistant	m64023e_220409_165810_107348543_ccs	13149	gene						8521	10702	-	CC2R_00000368				ALOMY2G20844
CC2R	Resistant	m64023e_220409_165810_107348543_ccs	13149	gene						10738	11052	-	CC2R_00000369
CC2R	Resistant	m64023e_220409_165810_107415101_ccs	9540	gene						2621	4751	-	CC2R_00000849				ALOMY1G06605
CC2R	Resistant	m64023e_220409_165810_107545922_ccs	13562	gene						4665	5480	-	CC2R_00000317				ALOMY4G29304
CC2R	Resistant	m64023e_220409_165810_107545922_ccs	13562	gene						10492	13169	+	CC2R_00000318				ALOMY0G48164
CC2R	Resistant	m64023e_220409_165810_107675705_ccs	17970	gene						13469	16754	-	CC2R_00000087				ALOMY7G39957
CC2R	Resistant	m64023e_220409_165810_107872584_ccs	23499	gene						17938	19764	-	CC2R_00000013				ALOMY2G20844
CC2R	Resistant	m64023e_220409_165810_107872584_ccs	23499	gene						20917	22558	+	CC2R_00000014	PF04195	Putative gypsy type transposon		ALOMY2G20844
CC2R	Resistant	m64023e_220409_165810_108003618_ccs	5250	gene						12	2755	-	CC2R_00001271	PF13883	Pyridoxamine 5'-phosphate oxidase		ALOMY3G15390
CC2R	Resistant	m64023e_220409_165810_108398584_ccs01	10736	gene						17	238	+	CC2R_00000688
CC2R	Resistant	m64023e_220409_165810_108398639_ccs	9301	gene						6052	7104	-	CC2R_00000875	PF00651	BTB/POZ domain	sp|Q8L765|BPM1_ARATH	ALOMY6G43383
CC2R	Resistant	m64023e_220409_165810_108399018_ccs	7102	gene						3187	3318	-	CC2R_00001111				ALOMY3G11423
CC2R	Resistant	m64023e_220409_165810_108462400_ccs	11704	gene						1388	4984	+	CC2R_00000542	PF00004	ATPase family associated with various cellular activities (AAA)	sp|P46466|PRS4_ORYSJ	ALOMY6G44274
CC2R	Resistant	m64023e_220409_165810_108462400_ccs	11704	gene						6396	7541	-	CC2R_00000543				ALOMY7G38657
CC2R	Resistant	m64023e_220409_165810_108792046_ccs	10770	gene						6670	6988	+	CC2R_00000683				ALOMY6G42914
CC2R	Resistant	m64023e_220409_165810_109117924_ccs	7200	gene						2909	6596	+	CC2R_00001099				ALOMY7G39587
CC2R	Resistant	m64023e_220409_165810_109184631_ccs	4207	gene						25	913	-	CC2R_00001361	PF00361	Proton-conducting membrane transporter	sp|P58420|NU4C_WHEAT	ALOMY0G47050
CC2R	Resistant	m64023e_220409_165810_109184631_ccs	4207	gene						2689	3453	+	CC2R_00001362	PF01578	Cytochrome C assembly protein	sp|A1EA58|CCSA_AGRST	ALOMY0G47049
CC2R	Resistant	m64023e_220409_165810_109184631_ccs	4207	gene						3605	4170	-	CC2R_00001363	PF00361	Proton-conducting membrane transporter	sp|P58420|NU4C_WHEAT	ALOMY0G47050
CC2R	Resistant	m64023e_220409_165810_109251392_ccs	3389	gene						640	1579	+	CC2R_00001426				ALOMY4G26194
CC2R	Resistant	m64023e_220409_165810_109315287_ccs	9120	gene						1289	1538	+	CC2R_00000888				ALOMY6G42914
CC2R	Resistant	m64023e_220409_165810_109447967_ccs	11966	gene						8956	9649	+	CC2R_00000527				ALOMY2G24538
CC2R	Resistant	m64023e_220409_165810_10947013_ccs	3630	gene						2	430	-	CC2R_00001409	PF00499	NADH-ubiquinone/plastoquinone oxidoreductase chain 6	sp|Q95H44|NU6C_WHEAT	ALOMY0G47051
CC2R	Resistant	m64023e_220409_165810_10947013_ccs	3630	gene						692	1234	-	CC2R_00001410	PF13237	4Fe-4S dicluster domain	sp|A1EA63|NDHI_AGRST	ALOMY0G47052
CC2R	Resistant	m64023e_220409_165810_10947013_ccs	3630	gene						1332	3619	-	CC2R_00001411	PF00146	NADH dehydrogenase	sp|A1EA64|NU1C_AGRST	ALOMY6G44543
CC2R	Resistant	m64023e_220409_165810_109512190_ccs	8299	gene						8059	8298	+	CC2R_00000974				ALOMY4G26519
CC2R	Resistant	m64023e_220409_165810_109513465_ccs	10297	gene						2476	3411	+	CC2R_00000742				ALOMY4G29304
CC2R	Resistant	m64023e_220409_165810_109576433_ccs	11580	gene						7856	10590	+	CC2R_00000573				ALOMY5G32354
CC2R	Resistant	m64023e_220409_165810_109774230_ccs	11250	gene						68	2548	-	CC2R_00000618	PF00223	Photosystem I psaA/psaB protein	sp|Q9MUK4|PSAA_ENCLE	ALOMY0G46726
CC2R	Resistant	m64023e_220409_165810_109774230_ccs	11250	gene						2885	5421	-	CC2R_00000619	PF00115	Cytochrome C and Quinol oxidase polypeptide I	sp|P14578|COX1_ORYSJ	ALOMY2G21334
CC2R	Resistant	m64023e_220409_165810_109774230_ccs	11250	gene						5491	6278	-	CC2R_00000620	PF03317	ELF protein		ALOMY2G21335
CC2R	Resistant	m64023e_220409_165810_109904065_ccs	10209	gene						3914	4264	+	CC2R_00000751	PF06364	Protein of unknown function (DUF1068)		ALOMY1G02108
CC2R	Resistant	m64023e_220409_165810_109904065_ccs	10209	gene						4640	5941	+	CC2R_00000752	PF06364	Protein of unknown function (DUF1068)		ALOMY1G02108
CC2R	Resistant	m64023e_220409_165810_110037533_ccs	20850	gene						741	3414	+	CC2R_00000027				ALOMY5G32354
CC2R	Resistant	m64023e_220409_165810_110298103_ccs	13380	gene						5197	5892	-	CC2R_00000344	PF00646	F-box domain		ALOMY3G16063
CC2R	Resistant	m64023e_220409_165810_110299377_ccs	18690	gene						2178	5939	-	CC2R_00000070	PF04195	Putative gypsy type transposon		ALOMY7G39957
CC2R	Resistant	m64023e_220409_165810_110692636_ccs0	13680	gene						3416	6551	+	CC2R_00000306				ALOMY5G32141
CC2R	Resistant	m64023e_220409_165810_110692636_ccs0	13680	gene						8107	11973	-	CC2R_00000307			sp|P40619|HMGL_IPONI	ALOMY4G30576
CC2R	Resistant	m64023e_220409_165810_110955117_ccs	13035	gene						11420	12356	+	CC2R_00000379	PF04667	cAMP-regulated phosphoprotein/endosulfine conserved region		ALOMY2G22668
CC2R	Resistant	m64023e_220409_165810_111018775_ccs	12570	gene						951	1820	-	CC2R_00000440	PF13456	Reverse transcriptase-like	sp|P0C2F6|RNHX1_ARATH	ALOMY3G15139
CC2R	Resistant	m64023e_220409_165810_111018775_ccs	12570	gene						6876	7822	-	CC2R_00000441				ALOMY3G13287
CC2R	Resistant	m64023e_220409_165810_111018775_ccs	12570	gene						10128	11307	-	CC2R_00000442				ALOMY6G45670
CC2R	Resistant	m64023e_220409_165810_111018775_ccs	12570	gene						11546	12025	-	CC2R_00000443				ALOMY3G13287
CC2R	Resistant	m64023e_220409_165810_111215072_ccs	10808	gene						8993	10127	+	CC2R_00000678				ALOMY5G32653
CC2R	Resistant	m64023e_220409_165810_111281452_ccs	4590	gene						1078	1944	+	CC2R_00001326				ALOMY5G35929
CC2R	Resistant	m64023e_220409_165810_111348207_ccs0	1702	gene						91	855	+	CC2R_00001528	PF00361	Proton-conducting membrane transporter	sp|P58420|NU4C_WHEAT	ALOMY0G47050
CC2R	Resistant	m64023e_220409_165810_111348207_ccs0	1702	gene						1380	1682	+	CC2R_00001529			sp|A8Y9D7|NU4C_LOLPR	ALOMY0G47050
CC2R	Resistant	m64023e_220409_165810_111938248_ccs	14353	gene						547	3316	+	CC2R_00000253				ALOMY2G20844
CC2R	Resistant	m64023e_220409_165810_112066855_ccs0	18300	gene						11387	14220	+	CC2R_00000075	PF04195	Putative gypsy type transposon		ALOMY2G20844
CC2R	Resistant	m64023e_220409_165810_112069301_ccs	10839	gene						1418	1879	-	CC2R_00000676				ALOMY2G18548
CC2R	Resistant	m64023e_220409_165810_112069301_ccs	10839	gene						4786	5439	-	CC2R_00000677				ALOMY1G07117
CC2R	Resistant	m64023e_220409_165810_112264434_ccs	3270	gene						31	327	-	CC2R_00001431	PF00164	Ribosomal protein S12/S23	sp|A1E9Q2|RR12_SORBI	ALOMY2G21331
CC2R	Resistant	m64023e_220409_165810_112264434_ccs	3270	gene						527	727	+	CC2R_00001432				ALOMY0G47054
CC2R	Resistant	m64023e_220409_165810_112264434_ccs	3270	gene						1060	2684	-	CC2R_00001433	PF00361	Proton-conducting membrane transporter	sp|P0CC87|NU2C2_LOLPR	ALOMY0G46717
CC2R	Resistant	m64023e_220409_165810_112265563_ccs	6792	gene						6382	6792	-	CC2R_00001146				ALOMY4G29679
CC2R	Resistant	m64023e_220409_165810_112396598_ccs01	12805	gene						5343	8363	+	CC2R_00000410				ALOMY5G32141
CC2R	Resistant	m64023e_220409_165810_112462024_ccs01	12330	gene						1138	1577	-	CC2R_00000462				ALOMY3G15094
CC2R	Resistant	m64023e_220409_165810_112462024_ccs01	12330	gene						6959	7120	-	CC2R_00000463			sp|P93401|NU2M_OENBE	ALOMY1G09811
CC2R	Resistant	m64023e_220409_165810_112658826_ccs	4470	gene						2695	3147	+	CC2R_00001332				ALOMY3G11169
CC2R	Resistant	m64023e_220409_165810_112854980_ccs	10470	gene						5457	5675	+	CC2R_00000731				ALOMY6G42914
CC2R	Resistant	m64023e_220409_165810_112855261_ccs	11403	gene						4644	5264	-	CC2R_00000588				ALOMY4G29304
CC2R	Resistant	m64023e_220409_165810_112986571_ccs	6030	gene						1070	5040	+	CC2R_00001203				ALOMY7G41247
CC2R	Resistant	m64023e_220409_165810_113117353_ccs0	8010	gene						15	1162	-	CC2R_00000995				ALOMY2G20844
CC2R	Resistant	m64023e_220409_165810_113117353_ccs0	8010	gene						1355	2101	-	CC2R_00000996	PF04195	Putative gypsy type transposon		ALOMY2G20844
CC2R	Resistant	m64023e_220409_165810_113509419_ccs	12579	gene						8531	10455	-	CC2R_00000438	PF07714	Protein tyrosine and serine/threonine kinase	sp|Q9ASS4|Y5838_ARATH	ALOMY5G33695
CC2R	Resistant	m64023e_220409_165810_113707297_ccs	4620	gene						2079	2267	-	CC2R_00001321				ALOMY7G38114
CC2R	Resistant	m64023e_220409_165810_113707297_ccs	4620	gene						4161	4493	+	CC2R_00001322				ALOMY5G35303
CC2R	Resistant	m64023e_220409_165810_113969713_ccs	15047	gene						5549	6999	+	CC2R_00000213	PF00106	short chain dehydrogenase	sp|Q8L9C4|KCR1_ARATH	ALOMY3G10868
CC2R	Resistant	m64023e_220409_165810_11404848_ccs	9090	gene						2965	6176	-	CC2R_00000890				ALOMY1G05155
CC2R	Resistant	m64023e_220409_165810_114165539_ccs	10770	gene						1780	2831	+	CC2R_00000684	PF11891	Protein RETICULATA-related	sp|Q9C9Z2|RER3_ARATH	ALOMY2G20400
CC2R	Resistant	m64023e_220409_165810_114231879_ccs	12210	gene						6694	9806	+	CC2R_00000490	PF03283	Pectinacetylesterase	sp|Q9SR22|PAE5_ARATH	ALOMY2G17901
CC2R	Resistant	m64023e_220409_165810_114557652_ccs	17280	gene						5370	5717	-	CC2R_00000112				ALOMY4G26178
CC2R	Resistant	m64023e_220409_165810_114557652_ccs	17280	gene						5836	6762	-	CC2R_00000113	PF07762	Protein of unknown function (DUF1618)		ALOMY1G04244
CC2R	Resistant	m64023e_220409_165810_114622570_ccs	6114	gene						872	1792	-	CC2R_00001196				ALOMY2G20230
CC2R	Resistant	m64023e_220409_165810_114688693_ccs	17643	gene						5272	7938	-	CC2R_00000101				ALOMY2G20844
CC2R	Resistant	m64023e_220409_165810_114688693_ccs	17643	gene						7992	8213	-	CC2R_00000102				ALOMY2G20844
CC2R	Resistant	m64023e_220409_165810_114688693_ccs	17643	gene						15123	15587	-	CC2R_00000103				ALOMY4G25580
CC2R	Resistant	m64023e_220409_165810_114819556_ccs	8649	gene						359	5491	+	CC2R_00000936	PF00411	Ribosomal protein S11	sp|A8Y9C2|RR8_LOLPR	ALOMY2G20362
CC2R	Resistant	m64023e_220409_165810_114819556_ccs	8649	gene						6756	7065	-	CC2R_00000937	PF00181	Ribosomal Proteins L2, RNA binding domain	sp|A8Y9C8|RK2_LOLPR	ALOMY0G47044
CC2R	Resistant	m64023e_220409_165810_11535884_ccs	7590	gene						354	2735	-	CC2R_00001062				ALOMY5G32141
CC2R	Resistant	m64023e_220409_165810_115475918_ccs	17610	gene						183	2586	-	CC2R_00000107				ALOMY1G06605
CC2R	Resistant	m64023e_220409_165810_115475918_ccs	17610	gene						2719	3577	-	CC2R_00000108	PF04195	Putative gypsy type transposon		ALOMY1G05155
CC2R	Resistant	m64023e_220409_165810_115476466_ccs	3450	gene						1	357	-	CC2R_00001417	PF00177	Ribosomal protein S7p/S5e	sp|A1E9W9|RR7_SORBI	ALOMY0G47046
CC2R	Resistant	m64023e_220409_165810_115476466_ccs	3450	gene						969	3416	-	CC2R_00001418	PF00164	Ribosomal protein S12/S23	sp|P0CC87|NU2C2_LOLPR	ALOMY6G44070
CC2R	Resistant	m64023e_220409_165810_115540363_ccs	11340	gene						5887	6348	-	CC2R_00000604
CC2R	Resistant	m64023e_220409_165810_115540363_ccs	11340	gene						8834	9797	-	CC2R_00000605	PF00646	F-box domain		ALOMY7G37826
CC2R	Resistant	m64023e_220409_165810_115738587_ccs01	20256	gene						10616	11758	+	CC2R_00000045				ALOMY4G29767
CC2R	Resistant	m64023e_220409_165810_115738587_ccs01	20256	gene						11783	13066	+	CC2R_00000046	PF01873	Domain found in IF2B/IF5	sp|P55876|IF5_MAIZE	ALOMY4G29768
CC2R	Resistant	m64023e_220409_165810_116000857_ccs	14435	gene						7808	10182	+	CC2R_00000242				ALOMY2G24538
CC2R	Resistant	m64023e_220409_165810_116065886_ccs	11370	gene						7484	7765	+	CC2R_00000602				ALOMY1G05155
CC2R	Resistant	m64023e_220409_165810_116065886_ccs	11370	gene						7975	10752	+	CC2R_00000603				ALOMY1G05155
CC2R	Resistant	m64023e_220409_165810_116197150_ccs	11682	gene						4664	5930	-	CC2R_00000547				ALOMY1G05155
CC2R	Resistant	m64023e_220409_165810_116197150_ccs	11682	gene						6034	7843	-	CC2R_00000548				ALOMY1G05155
CC2R	Resistant	m64023e_220409_165810_116197735_ccs	2280	gene						1527	2268	+	CC2R_00001500	PF00329	Respiratory-chain NADH dehydrogenase, 30 Kd subunit	sp|Q95H60|NDHJ_WHEAT	ALOMY3G14315
CC2R	Resistant	m64023e_220409_165810_116393783_ccs	10243	gene						2693	5669	-	CC2R_00000748				ALOMY5G32141
CC2R	Resistant	m64023e_220409_165810_117311500_ccs	15360	gene						2978	5630	-	CC2R_00000195	PF13968	Domain of unknown function (DUF4220)		ALOMY6G46156
CC2R	Resistant	m64023e_220409_165810_117507272_ccs	3448	gene						2253	2852	-	CC2R_00001422				ALOMY6G44405
CC2R	Resistant	m64023e_220409_165810_117704338_ccs	11940	gene						1513	1959	+	CC2R_00000529				ALOMY5G31918
CC2R	Resistant	m64023e_220409_165810_117768709_ccs	8041	gene						2352	5289	+	CC2R_00000992				ALOMY2G20844
CC2R	Resistant	m64023e_220409_165810_117768822_ccs	12210	gene						1033	1170	-	CC2R_00000491				ALOMY3G12786
CC2R	Resistant	m64023e_220409_165810_117768822_ccs	12210	gene						2332	2716	-	CC2R_00000492				ALOMY5G36588
CC2R	Resistant	m64023e_220409_165810_117768822_ccs	12210	gene						2852	5264	+	CC2R_00000493				ALOMY5G36587
CC2R	Resistant	m64023e_220409_165810_117768822_ccs	12210	gene						6546	9918	-	CC2R_00000494	PF00232	Glycosyl hydrolase family 1	sp|Q7XPY7|BGL14_ORYSJ	ALOMY3G12785
CC2R	Resistant	m64023e_220409_165810_118163799_ccs	6668	gene						5691	5973	+	CC2R_00001162				ALOMY1G07946
CC2R	Resistant	m64023e_220409_165810_118686307_ccs0	4890	gene						168	4143	+	CC2R_00001301	PF00623	RNA polymerase Rpb1, domain 2	sp|A8Y9G1|RPOC1_LOLPR	ALOMY1G02759
CC2R	Resistant	m64023e_220409_165810_118686307_ccs01	4890	gene						2805	3503	+	CC2R_00001299	PF00623	RNA polymerase Rpb1, domain 2	sp|A8Y9G1|RPOC1_LOLPR	ALOMY1G02759
CC2R	Resistant	m64023e_220409_165810_119016225_ccs	7710	gene						1473	3049	+	CC2R_00001040	PF00646	F-box domain		ALOMY7G40752
CC2R	Resistant	m64023e_220409_165810_119016225_ccs	7710	gene						6845	7690	+	CC2R_00001041	PF08246	Cathepsin propeptide inhibitor domain (I29)	sp|P25776|ORYA_ORYSJ	ALOMY7G40750
CC2R	Resistant	m64023e_220409_165810_119146918_ccs	21214	gene						9723	12717	-	CC2R_00000024				ALOMY5G32141
CC2R	Resistant	m64023e_220409_165810_119209990_ccs	3909	gene						31	738	+	CC2R_00001388	PF00361	Proton-conducting membrane transporter	sp|P58420|NU4C_WHEAT	ALOMY0G47050
CC2R	Resistant	m64023e_220409_165810_119209990_ccs	3909	gene						1149	2759	+	CC2R_00001389	PF00499	NADH-ubiquinone/plastoquinone oxidoreductase chain 6	sp|Q95H44|NU6C_WHEAT	ALOMY0G47051
CC2R	Resistant	m64023e_220409_165810_119209990_ccs	3909	gene						3284	3880	+	CC2R_00001390	PF00361	Proton-conducting membrane transporter	sp|O03060|NU4C_HORVU	ALOMY0G47050
CC2R	Resistant	m64023e_220409_165810_119211269_ccs	5580	gene						14	1607	-	CC2R_00001238	PF00124	Photosynthetic reaction centre protein	sp|P10803|PSBD_SECCE	ALOMY2G18054
CC2R	Resistant	m64023e_220409_165810_119211269_ccs	5580	gene						1855	5337	-	CC2R_00001239	PF00421	Photosystem II protein	sp|A9L992|PSBC_LEMMI	ALOMY0G46722
CC2R	Resistant	m64023e_220409_165810_119539043_ccs	13260	gene						1921	3430	+	CC2R_00000351	PF03016	Exostosin family	sp|Q8H038|KATAM_ORYSJ	ALOMY6G46183
CC2R	Resistant	m64023e_220409_165810_119539586_ccs	3930	gene						263	1485	-	CC2R_00001384	PF02721	Domain of unknown function DUF223	sp|Q23696|RFA1_CRIFA	ALOMY2G24077
CC2R	Resistant	m64023e_220409_165810_119669320_ccs	14177	gene						11814	13482	+	CC2R_00000271	PF00164	Ribosomal protein S12/S23	sp|A4GYN8|RR12B_POPTR	ALOMY2G21331
CC2R	Resistant	m64023e_220409_165810_119998798_ccs	8670	gene						4528	4755	+	CC2R_00000933				ALOMY4G29810
CC2R	Resistant	m64023e_220409_165810_120195359_ccs	11932	gene						4803	8229	+	CC2R_00000530				ALOMY7G39957
CC2R	Resistant	m64023e_220409_165810_120325961_ccs	10200	gene						882	1130	-	CC2R_00000760				ALOMY6G42914
CC2R	Resistant	m64023e_220409_165810_120522760_ccs	4920	gene						2233	4771	+	CC2R_00001298				ALOMY6G45763
CC2R	Resistant	m64023e_220409_165810_120523272_ccs	13512	gene						7206	10597	+	CC2R_00000328	PF04195	Putative gypsy type transposon		ALOMY1G05155
CC2R	Resistant	m64023e_220409_165810_120586366_ccs	16260	gene						8199	9014	+	CC2R_00000162				ALOMY4G29304
CC2R	Resistant	m64023e_220409_165810_120979524_ccs	6610	gene						1363	1749	-	CC2R_00001165				ALOMY7G37035
CC2R	Resistant	m64023e_220409_165810_120980244_ccs	13080	gene						9887	10003	-	CC2R_00000378
CC2R	Resistant	m64023e_220409_165810_121111668_ccs	7500	gene						247	576	-	CC2R_00001068				ALOMY4G28741
CC2R	Resistant	m64023e_220409_165810_121111668_ccs	7500	gene						1057	3908	+	CC2R_00001069	PF07714	Protein tyrosine and serine/threonine kinase	sp|Q7FZR1|RLP52_ARATH	ALOMY4G28740
CC2R	Resistant	m64023e_220409_165810_121111668_ccs	7500	gene						5085	7477	+	CC2R_00001070
CC2R	Resistant	m64023e_220409_165810_121112705_ccs	9870	gene						24	2133	-	CC2R_00000800	PF04195	Putative gypsy type transposon		ALOMY5G32141
CC2R	Resistant	m64023e_220409_165810_121112705_ccs	9870	gene						4212	8190	-	CC2R_00000801				ALOMY5G32141
CC2R	Resistant	m64023e_220409_165810_121440157_ccs	14130	gene						1108	8133	+	CC2R_00000273	PF00562	RNA polymerase Rpb2, domain 6	sp|A1E9Z8|RPOB_AGRST	ALOMY1G02759
CC2R	Resistant	m64023e_220409_165810_121440157_ccs	14130	gene						8920	11352	-	CC2R_00000274	PF00421	Photosystem II protein	sp|P11849|PSBD_HORVU	ALOMY2G18054
CC2R	Resistant	m64023e_220409_165810_121506123_ccs	14061	gene						305	676	-	CC2R_00000285	PF13456	Reverse transcriptase-like		ALOMY3G15139
CC2R	Resistant	m64023e_220409_165810_121506123_ccs	14061	gene						9309	13471	-	CC2R_00000286	PF00171	Aldehyde dehydrogenase family	sp|Q70E96|AL3F1_ARATH	ALOMY4G27723
CC2R	Resistant	m64023e_220409_165810_121766483_ccs	7620	gene						2449	2761	+	CC2R_00001056				ALOMY6G42914
CC2R	Resistant	m64023e_220409_165810_121899331_ccs0	8730	gene						1975	3173	-	CC2R_00000926				ALOMY4G26937
CC2R	Resistant	m64023e_220409_165810_122159911_ccs	10537	gene						8789	9106	+	CC2R_00000725				ALOMY6G42914
CC2R	Resistant	m64023e_220409_165810_122355800_ccs	15270	gene						3878	6385	-	CC2R_00000199				ALOMY1G05155
CC2R	Resistant	m64023e_220409_165810_122356743_ccs	13500	gene						3849	4424	+	CC2R_00000330				ALOMY4G29304
CC2R	Resistant	m64023e_220409_165810_122421686_ccs	20730	gene						10194	13147	+	CC2R_00000033	PF04195	Putative gypsy type transposon		ALOMY2G20844
CC2R	Resistant	m64023e_220409_165810_122553421_ccs	2940	gene						171	1271	-	CC2R_00001451	PF00329	Respiratory-chain NADH dehydrogenase, 30 Kd subunit	sp|Q95H60|NDHJ_WHEAT	ALOMY3G14315
CC2R	Resistant	m64023e_220409_165810_122554087_ccs	17520	gene						11102	11134	+	CC2R_00000110
CC2R	Resistant	m64023e_220409_165810_122749606_ccs	15450	gene						13966	14391	-	CC2R_00000188	PF13456	Reverse transcriptase-like		ALOMY3G15139
CC2R	Resistant	m64023e_220409_165810_122749606_ccs	15450	gene						14940	14987	-	CC2R_00000189
CC2R	Resistant	m64023e_220409_165810_122814479_ccs	7890	gene						40	319	+	CC2R_00001017	PF00181	Ribosomal Proteins L2, RNA binding domain	sp|A8Y9C8|RK2_LOLPR	ALOMY0G47044
CC2R	Resistant	m64023e_220409_165810_122814479_ccs	7890	gene						2074	3135	-	CC2R_00001018	PF00124	Photosynthetic reaction centre protein	sp|A1E9Y8|PSBA_AGRST	ALOMY0G46720
CC2R	Resistant	m64023e_220409_165810_122814479_ccs	7890	gene						3708	4633	-	CC2R_00001019	PF01824	MatK/TrnK amino terminal region	sp|Q9MUZ6|MATK_AVESA	ALOMY0G46721
CC2R	Resistant	m64023e_220409_165810_122814619_ccs	12225	gene						6975	9549	+	CC2R_00000487				ALOMY3G10702
CC2R	Resistant	m64023e_220409_165810_122814619_ccs	12225	gene						11224	12198	+	CC2R_00000488	PF01786	Alternative oxidase	sp|Q56X52|AOX4_ARATH	ALOMY3G10703
CC2R	Resistant	m64023e_220409_165810_122815044_ccs	6080	gene						684	932	-	CC2R_00001200				ALOMY6G42914
CC2R	Resistant	m64023e_220409_165810_122816769_ccs0	8460	gene						1248	1954	-	CC2R_00000958				ALOMY1G02914
CC2R	Resistant	m64023e_220409_165810_122946043_ccs	5441	gene						1775	2350	-	CC2R_00001252				ALOMY4G26212
CC2R	Resistant	m64023e_220409_165810_122946043_ccs	5441	gene						3988	4476	+	CC2R_00001253				ALOMY2G24043
CC2R	Resistant	m64023e_220409_165810_122947339_ccs0	9150	gene						2100	2369	-	CC2R_00000885
CC2R	Resistant	m64023e_220409_165810_123143355_ccs01	11475	gene						2326	2860	-	CC2R_00000581				ALOMY0G48486
CC2R	Resistant	m64023e_220409_165810_123143355_ccs01	11475	gene						3463	4861	-	CC2R_00000582				ALOMY5G31517
CC2R	Resistant	m64023e_220409_165810_123143355_ccs01	11475	gene						5987	6373	-	CC2R_00000583				ALOMY3G13638
CC2R	Resistant	m64023e_220409_165810_123470173_ccs	17053	gene						7484	10252	-	CC2R_00000129	PF04195	Putative gypsy type transposon		ALOMY2G20844
CC2R	Resistant	m64023e_220409_165810_123470173_ccs	17053	gene						15708	17051	+	CC2R_00000130				ALOMY2G20844
CC2R	Resistant	m64023e_220409_165810_123470426_ccs	12240	gene						967	4565	-	CC2R_00000486	PF04195	Putative gypsy type transposon		ALOMY7G39957
CC2R	Resistant	m64023e_220409_165810_123799564_ccs	14641	gene						2430	6084	-	CC2R_00000240				ALOMY4G30880
CC2R	Resistant	m64023e_220409_165810_123865193_ccs	7988	gene						5030	7850	-	CC2R_00001002	PF12776	Myb/SANT-like DNA-binding domain		ALOMY3G15133
CC2R	Resistant	m64023e_220409_165810_123928988_ccs	4348	gene						997	2326	-	CC2R_00001346				ALOMY4G25999
CC2R	Resistant	m64023e_220409_165810_124192669_ccs	2790	gene						1312	1344	+	CC2R_00001458
CC2R	Resistant	m64023e_220409_165810_124388497_ccs	15270	gene						3448	6388	-	CC2R_00000198	PF04195	Putative gypsy type transposon		ALOMY2G20844
CC2R	Resistant	m64023e_220409_165810_124454931_ccs	11143	gene						1610	2681	+	CC2R_00000633				ALOMY3G15381
CC2R	Resistant	m64023e_220409_165810_124454931_ccs	11143	gene						3168	7909	-	CC2R_00000634				ALOMY5G32832
CC2R	Resistant	m64023e_220409_165810_124454931_ccs	11143	gene						9698	11110	+	CC2R_00000635	PF02458	Transferase family	sp|A1XWY7|CFAT_PETHY	ALOMY6G46427
CC2R	Resistant	m64023e_220409_165810_124455090_ccs	10620	gene						3424	3681	-	CC2R_00000699
CC2R	Resistant	m64023e_220409_165810_124455090_ccs	10620	gene						3849	4254	-	CC2R_00000700
CC2R	Resistant	m64023e_220409_165810_124455090_ccs	10620	gene						5668	5986	-	CC2R_00000701				ALOMY7G38722
CC2R	Resistant	m64023e_220409_165810_124455090_ccs	10620	gene						6120	6438	-	CC2R_00000702				ALOMY7G38722
CC2R	Resistant	m64023e_220409_165810_124455090_ccs	10620	gene						6572	6890	-	CC2R_00000703				ALOMY7G38722
CC2R	Resistant	m64023e_220409_165810_124455090_ccs	10620	gene						7024	7327	-	CC2R_00000704				ALOMY7G38722
CC2R	Resistant	m64023e_220409_165810_124455090_ccs	10620	gene						7477	7795	-	CC2R_00000705				ALOMY7G38722
CC2R	Resistant	m64023e_220409_165810_124455090_ccs	10620	gene						7929	8247	-	CC2R_00000706				ALOMY7G38722
CC2R	Resistant	m64023e_220409_165810_124455090_ccs	10620	gene						8381	8699	-	CC2R_00000707				ALOMY7G38722
CC2R	Resistant	m64023e_220409_165810_124455090_ccs	10620	gene						8833	9136	-	CC2R_00000708				ALOMY7G38722
CC2R	Resistant	m64023e_220409_165810_124455090_ccs	10620	gene						9286	9711	-	CC2R_00000709				ALOMY7G38722
CC2R	Resistant	m64023e_220409_165810_124520731_ccs	12000	gene						8754	11445	-	CC2R_00000525				ALOMY2G20844
CC2R	Resistant	m64023e_220409_165810_124652030_ccs	11490	gene						6222	6491	+	CC2R_00000578				ALOMY6G42914
CC2R	Resistant	m64023e_220409_165810_124782923_ccs	9150	gene						2	209	-	CC2R_00000886	PF00283	Cytochrome b559, alpha (gene psbE) and beta (gene psbF)subunits	sp|Q5SD42|PSBF_HUPLU	ALOMY0G47274
CC2R	Resistant	m64023e_220409_165810_124782923_ccs	9150	gene						5879	6848	-	CC2R_00000887	PF00574	Clp protease	sp|P26567|CLPP_MAIZE	ALOMY0G46731
CC2R	Resistant	m64023e_220409_165810_125240086_ccs	11608	gene						4739	7671	+	CC2R_00000567	PF04195	Putative gypsy type transposon		ALOMY2G20844
CC2R	Resistant	m64023e_220409_165810_125306596_ccs	8460	gene						726	1459	-	CC2R_00000955				ALOMY2G22867
CC2R	Resistant	m64023e_220409_165810_125502028_ccs	15093	gene						6106	7056	-	CC2R_00000205	PF01612	3'-5' exonuclease		ALOMY4G30212
CC2R	Resistant	m64023e_220409_165810_125700398_ccs	16525	gene						5424	5633	+	CC2R_00000153				ALOMY6G42914
CC2R	Resistant	m64023e_220409_165810_125829261_ccs	5666	gene						2598	3731	-	CC2R_00001234	PF01282	Ribosomal protein S24e	sp|Q8LC83|RS242_ARATH	ALOMY4G28707
CC2R	Resistant	m64023e_220409_165810_125895397_ccs	9928	gene						5258	9042	+	CC2R_00000791	PF01061	ABC-2 type transporter	sp|H9BZ66|ABCG1_PETHY	ALOMY7G40415
CC2R	Resistant	m64023e_220409_165810_125896022_ccs	22050	gene						738	1148	-	CC2R_00000021	PF00125	Core histone H2A/H2B/H3/H4	sp|P68428|H32_WHEAT	ALOMY7G37823
CC2R	Resistant	m64023e_220409_165810_125896640_ccs	7980	gene						8	3836	-	CC2R_00001005	PF04195	Putative gypsy type transposon		ALOMY1G05155
CC2R	Resistant	m64023e_220409_165810_126026785_ccs	9540	gene						354	1266	+	CC2R_00000851	PF12776	Myb/SANT-like DNA-binding domain		ALOMY3G15133
CC2R	Resistant	m64023e_220409_165810_126027244_ccs	9870	gene						8058	8495	-	CC2R_00000802				ALOMY2G24131
CC2R	Resistant	m64023e_220409_165810_126353795_ccs	7840	gene						469	1018	-	CC2R_00001024				ALOMY1G07266
CC2R	Resistant	m64023e_220409_165810_126354889_ccs	7986	gene						3698	6590	+	CC2R_00001003				ALOMY5G32141
CC2R	Resistant	m64023e_220409_165810_126484826_ccs	10245	gene						8973	9221	+	CC2R_00000747				ALOMY6G42914
CC2R	Resistant	m64023e_220409_165810_126615865_ccs	9720	gene						12	2292	-	CC2R_00000830	PF00421	Photosystem II protein	sp|P11849|PSBD_HORVU	ALOMY2G18054
CC2R	Resistant	m64023e_220409_165810_126615865_ccs	9720	gene						7754	9289	+	CC2R_00000831	PF01824	MatK/TrnK amino terminal region	sp|Q9MUZ4|MATK_PHLPR	ALOMY0G46721
CC2R	Resistant	m64023e_220409_165810_126616009_ccs	11371	gene						5704	6106	+	CC2R_00000598
CC2R	Resistant	m64023e_220409_165810_126616009_ccs	11371	gene						6508	9250	+	CC2R_00000599				ALOMY1G05155
CC2R	Resistant	m64023e_220409_165810_126681514_ccs	11190	gene						4933	5514	-	CC2R_00000625	PF00722	Glycosyl hydrolases family 16	sp|Q9SVV2|XTH26_ARATH	ALOMY1G08326
CC2R	Resistant	m64023e_220409_165810_126747050_ccs	3180	gene						15	463	-	CC2R_00001438			sp|P19683|ROC4_NICSY	ALOMY1G08201
CC2R	Resistant	m64023e_220409_165810_126748913_ccs	5580	gene						62	2997	-	CC2R_00001240	PF04195	Putative gypsy type transposon		ALOMY2G20844
CC2R	Resistant	m64023e_220409_165810_126814737_ccs	9049	gene						6769	8551	+	CC2R_00000897				ALOMY2G17961
CC2R	Resistant	m64023e_220409_165810_126944000_ccs	8622	gene						1059	2011	+	CC2R_00000939	PF01612	3'-5' exonuclease		ALOMY4G30212
CC2R	Resistant	m64023e_220409_165810_127206414_ccs	10203	gene						5292	10202	-	CC2R_00000753			sp|C0LGH8|Y1634_ARATH	ALOMY3G12592
CC2R	Resistant	m64023e_220409_165810_127402923_ccs	17437	gene						4053	4299	-	CC2R_00000111				ALOMY6G42914
CC2R	Resistant	m64023e_220409_165810_12781057_ccs	11070	gene						4513	4872	+	CC2R_00000643				ALOMY5G31918
CC2R	Resistant	m64023e_220409_165810_128058356_ccs	7664	gene						1404	3162	+	CC2R_00001045				ALOMY1G09478
CC2R	Resistant	m64023e_220409_165810_128058356_ccs	7664	gene						4645	4869	-	CC2R_00001046	PF13456	Reverse transcriptase-like		ALOMY3G15139
CC2R	Resistant	m64023e_220409_165810_128060252_ccs0	12600	gene						1673	4605	-	CC2R_00000431				ALOMY2G20844
CC2R	Resistant	m64023e_220409_165810_128060252_ccs0	12600	gene						8029	11223	-	CC2R_00000432	PF04195	Putative gypsy type transposon		ALOMY5G32141
CC2R	Resistant	m64023e_220409_165810_128060252_ccs0	12600	gene						11239	11517	-	CC2R_00000433
CC2R	Resistant	m64023e_220409_165810_128060252_ccs01	10044	gene						290	3474	-	CC2R_00000782				ALOMY5G32141
CC2R	Resistant	m64023e_220409_165810_128060252_ccs01	10044	gene						3490	3770	-	CC2R_00000783
CC2R	Resistant	m64023e_220409_165810_128320900_ccs	5250	gene						2669	5224	-	CC2R_00001270	PF04997	RNA polymerase Rpb1, domain 1	sp|A8Y9G1|RPOC1_LOLPR	ALOMY1G02759
CC2R	Resistant	m64023e_220409_165810_12846682_ccs	4936	gene						2677	4701	-	CC2R_00001291				ALOMY1G06931
CC2R	Resistant	m64023e_220409_165810_128845611_ccs	13261	gene						4763	7988	-	CC2R_00000350	PF04195	Putative gypsy type transposon		ALOMY1G05155
CC2R	Resistant	m64023e_220409_165810_129238265_ccs	8220	gene						3192	4277	-	CC2R_00000981	PF00646	F-box domain	sp|Q9SSQ2|FB55_ARATH	ALOMY7G41421
CC2R	Resistant	m64023e_220409_165810_129433960_ccs	16440	gene						11002	11816	+	CC2R_00000154				ALOMY4G29304
CC2R	Resistant	m64023e_220409_165810_129630787_ccs	4710	gene						832	2807	-	CC2R_00001316				ALOMY1G07925
CC2R	Resistant	m64023e_220409_165810_129696394_ccs	6090	gene						247	3525	-	CC2R_00001198	PF04195	Putative gypsy type transposon		ALOMY1G05155
CC2R	Resistant	m64023e_220409_165810_129698024_ccs	7980	gene						1085	4675	+	CC2R_00001004				ALOMY7G39957
CC2R	Resistant	m64023e_220409_165810_129763053_ccs	3870	gene						3159	3383	+	CC2R_00001395				ALOMY7G37679
CC2R	Resistant	m64023e_220409_165810_129828621_ccs	11340	gene						1360	2101	+	CC2R_00000606	PF01578	Cytochrome C assembly protein	sp|A1EA58|CCSA_AGRST	ALOMY0G47049
CC2R	Resistant	m64023e_220409_165810_129828621_ccs	11340	gene						2278	3640	-	CC2R_00000607	PF00361	Proton-conducting membrane transporter	sp|P58420|NU4C_WHEAT	ALOMY0G47050
CC2R	Resistant	m64023e_220409_165810_129828621_ccs	11340	gene						4165	5690	-	CC2R_00000608	PF00499	NADH-ubiquinone/plastoquinone oxidoreductase chain 6	sp|Q95H44|NU6C_WHEAT	ALOMY0G47051
CC2R	Resistant	m64023e_220409_165810_129828621_ccs	11340	gene						5953	6495	-	CC2R_00000609	PF13237	4Fe-4S dicluster domain	sp|A1EA63|NDHI_AGRST	ALOMY0G47052
CC2R	Resistant	m64023e_220409_165810_129828621_ccs	11340	gene						6593	9574	-	CC2R_00000610	PF00146	NADH dehydrogenase	sp|A1EA64|NU1C_AGRST	ALOMY0G47053
CC2R	Resistant	m64023e_220409_165810_129828621_ccs	11340	gene						9613	10445	-	CC2R_00000611	PF00361	Proton-conducting membrane transporter	sp|A8Y9D4|NU5C_LOLPR	ALOMY0G47048
CC2R	Resistant	m64023e_220409_165810_130089727_ccs	3090	gene						68	2742	-	CC2R_00001444	PF00361	Proton-conducting membrane transporter	sp|P58420|NU4C_WHEAT	ALOMY0G47050
CC2R	Resistant	m64023e_220409_165810_130417594_ccs	7380	gene						1264	1558	+	CC2R_00001081				ALOMY2G24872
CC2R	Resistant	m64023e_220409_165810_130417594_ccs	7380	gene						2733	3104	-	CC2R_00001082				ALOMY2G24871
CC2R	Resistant	m64023e_220409_165810_13044080_ccs	9706	gene						5025	7967	+	CC2R_00000835				ALOMY1G05155
CC2R	Resistant	m64023e_220409_165810_130484593_ccs01	4358	gene						2437	4136	+	CC2R_00001344				ALOMY5G32141
CC2R	Resistant	m64023e_220409_165810_130548974_ccs	10470	gene						3509	3820	+	CC2R_00000732				ALOMY4G30235
CC2R	Resistant	m64023e_220409_165810_130747201_ccs	2768	gene						85	759	+	CC2R_00001459	PF03040	CemA family	sp|A1EA20|CEMA_AGRST	ALOMY3G14792
CC2R	Resistant	m64023e_220409_165810_130747201_ccs	2768	gene						1003	2483	-	CC2R_00001460	PF02392	Ycf4	sp|A8Y9I0|YCF4_LOLPR	ALOMY3G14791
CC2R	Resistant	m64023e_220409_165810_131268919_ccs	11250	gene						8512	10793	-	CC2R_00000617	PF00719	Inorganic pyrophosphatase	sp|Q93V56|IPYR1_ARATH	ALOMY4G30875
CC2R	Resistant	m64023e_220409_165810_131730198_ccs	6711	gene						4654	5100	+	CC2R_00001159				ALOMY5G31918
CC2R	Resistant	m64023e_220409_165810_131795223_ccs	20832	gene						19013	19249	+	CC2R_00000028				ALOMY2G23953
CC2R	Resistant	m64023e_220409_165810_131924324_ccs	8310	gene						5591	5842	+	CC2R_00000968				ALOMY6G42914
CC2R	Resistant	m64023e_220409_165810_132382969_ccs0	16410	gene						13646	14812	-	CC2R_00000156				ALOMY5G33224
CC2R	Resistant	m64023e_220409_165810_13240487_ccs	15146	gene						4796	5470	-	CC2R_00000204				ALOMY4G29304
CC2R	Resistant	m64023e_220409_165810_132514379_ccs	17130	gene						2757	9762	+	CC2R_00000115	PF00346	Respiratory-chain NADH dehydrogenase, 49 Kd subunit	sp|P0C337|NDHH_ORYSJ	ALOMY0G47042
CC2R	Resistant	m64023e_220409_165810_132514379_ccs	17130	gene						2787	12568	-	CC2R_00000116	PF01578	Cytochrome C assembly protein	sp|A1EA58|CCSA_AGRST	ALOMY0G47049
CC2R	Resistant	m64023e_220409_165810_132514379_ccs	17130	gene						10286	11653	+	CC2R_00000117	PF00361	Proton-conducting membrane transporter	sp|Q8S8U7|NU4C_ATRBE	ALOMY0G47050
CC2R	Resistant	m64023e_220409_165810_132514379_ccs	17130	gene						14762	16316	+	CC2R_00000118	PF00361	Proton-conducting membrane transporter	sp|A1EA56|NU5C_AGRST	ALOMY0G47048
CC2R	Resistant	m64023e_220409_165810_132514379_ccs	17130	gene						16381	17014	+	CC2R_00000119	PF01010	NADH-dehyrogenase subunit F, TMs, (complex I) C-terminus	sp|Q32880|NU5C_POAPR	ALOMY0G47048
CC2R	Resistant	m64023e_220409_165810_132645475_ccs	4950	gene						2909	3301	+	CC2R_00001289				ALOMY7G41926
CC2R	Resistant	m64023e_220409_165810_132907840_ccs	14280	gene						2599	3155	-	CC2R_00000255				ALOMY1G01058
CC2R	Resistant	m64023e_220409_165810_132907840_ccs	14280	gene						3898	4443	+	CC2R_00000256			sp|P42793|RM05_ARATH	ALOMY1G09790
CC2R	Resistant	m64023e_220409_165810_132907840_ccs	14280	gene						5716	6915	+	CC2R_00000257	PF00033	Cytochrome b/b6/petB	sp|P04165|CYB_MAIZE	ALOMY0G47345
CC2R	Resistant	m64023e_220409_165810_133038481_ccs	19428	gene						9200	9907	+	CC2R_00000055	PF04195	Putative gypsy type transposon		ALOMY1G05155
CC2R	Resistant	m64023e_220409_165810_133038481_ccs	19428	gene						9961	11274	+	CC2R_00000056				ALOMY1G05155
CC2R	Resistant	m64023e_220409_165810_133038481_ccs	19428	gene						11293	12141	+	CC2R_00000057				ALOMY1G06605
CC2R	Resistant	m64023e_220409_165810_133038481_ccs	19428	gene						12192	12830	+	CC2R_00000058
CC2R	Resistant	m64023e_220409_165810_133366448_ccs	11190	gene						201	11145	-	CC2R_00000624				ALOMY5G34718
CC2R	Resistant	m64023e_220409_165810_133499239_ccs	4710	gene						1037	1225	-	CC2R_00001314				ALOMY1G01108	TF
CC2R	Resistant	m64023e_220409_165810_133563672_ccs	12060	gene						68	7632	-	CC2R_00000519	PF03936	Terpene synthase family, metal binding domain	sp|Q5GJ59|TPS7_MAIZE	ALOMY1G08045
CC2R	Resistant	m64023e_220409_165810_133693681_ccs	7590	gene						72	809	+	CC2R_00001060				ALOMY2G23101
CC2R	Resistant	m64023e_220409_165810_133693681_ccs	7590	gene						2244	7009	-	CC2R_00001061	PF04434	SWIM zinc finger		ALOMY2G23100	TF
CC2R	Resistant	m64023e_220409_165810_13369688_ccs	3600	gene						827	1195	-	CC2R_00001413	PF00234	Protease inhibitor/seed storage/LTP family	sp|Q2QYL2|NLT2B_ORYSJ	ALOMY2G20485
CC2R	Resistant	m64023e_220409_165810_13371885_ccs	17014	gene						7807	11010	-	CC2R_00000131				ALOMY5G36562
CC2R	Resistant	m64023e_220409_165810_13371885_ccs	17014	gene						8151	8513	+	CC2R_00000132				ALOMY7G37035
CC2R	Resistant	m64023e_220409_165810_133826216_ccs0	4470	gene						519	752	-	CC2R_00001330	PF00346	Respiratory-chain NADH dehydrogenase, 49 Kd subunit	sp|P93306|NDUS2_ARATH	ALOMY3G12618
CC2R	Resistant	m64023e_220409_165810_133826216_ccs0	4470	gene						1344	4148	-	CC2R_00001331	PF00346	Respiratory-chain NADH dehydrogenase, 49 Kd subunit	sp|P93306|NDUS2_ARATH	ALOMY2G23641
CC2R	Resistant	m64023e_220409_165810_133957268_ccs	11202	gene						2941	3369	+	CC2R_00000622				ALOMY5G31918
CC2R	Resistant	m64023e_220409_165810_133957268_ccs	11202	gene						9650	10260	-	CC2R_00000623
CC2R	Resistant	m64023e_220409_165810_134154752_ccs	10020	gene						502	1425	+	CC2R_00000786	PF12937	F-box-like	sp|Q9SIH5|FB322_ARATH	ALOMY2G19469
CC2R	Resistant	m64023e_220409_165810_134286079_ccs	18690	gene						5954	8929	+	CC2R_00000069	PF04195	Putative gypsy type transposon		ALOMY5G32141
CC2R	Resistant	m64023e_220409_165810_13437309_ccs	13263	gene						536	622	-	CC2R_00000349
CC2R	Resistant	m64023e_220409_165810_13437562_ccs	10492	gene						9641	10468	+	CC2R_00000730				ALOMY4G29304
CC2R	Resistant	m64023e_220409_165810_134480300_ccs	9150	gene						5757	5960	-	CC2R_00000884				ALOMY6G42914
CC2R	Resistant	m64023e_220409_165810_134547916_ccs	4780	gene						137	4268	-	CC2R_00001310	PF02458	Transferase family	sp|Q9ZWR8|ANTA_GENTR	ALOMY1G06594
CC2R	Resistant	m64023e_220409_165810_134676925_ccs	7260	gene						2241	2503	-	CC2R_00001088
CC2R	Resistant	m64023e_220409_165810_134744687_ccs	12310	gene						656	2023	+	CC2R_00000470	PF00361	Proton-conducting membrane transporter	sp|P58420|NU4C_WHEAT	ALOMY0G47050
CC2R	Resistant	m64023e_220409_165810_134744687_ccs	12310	gene						2172	3102	-	CC2R_00000471	PF01578	Cytochrome C assembly protein	sp|A1EA58|CCSA_AGRST	ALOMY0G47049
CC2R	Resistant	m64023e_220409_165810_134744687_ccs	12310	gene						5133	7905	+	CC2R_00000472	PF00361	Proton-conducting membrane transporter	sp|A8Y9D4|NU5C_LOLPR	ALOMY0G47048
CC2R	Resistant	m64023e_220409_165810_134744687_ccs	12310	gene						7907	10017	+	CC2R_00000473	PF00146	NADH dehydrogenase	sp|A1EA64|NU1C_AGRST	ALOMY0G47053
CC2R	Resistant	m64023e_220409_165810_134744687_ccs	12310	gene						10115	11966	+	CC2R_00000474	PF00499	NADH-ubiquinone/plastoquinone oxidoreductase chain 6	sp|P05312|NDHI_WHEAT	ALOMY0G47052
CC2R	Resistant	m64023e_220409_165810_134810427_ccs	4142	gene						295	672	+	CC2R_00001368			sp|A1EA15|ATPB_AGRST	ALOMY0G46729
CC2R	Resistant	m64023e_220409_165810_134810427_ccs	4142	gene						804	4119	+	CC2R_00001369	PF00006	ATP synthase alpha/beta family, nucleotide-binding domain	sp|P00828|ATPB_HORVU	ALOMY0G46729
CC2R	Resistant	m64023e_220409_165810_134938735_ccs	12180	gene						8219	9252	-	CC2R_00000502			sp|Q10Q26|Y3123_ORYSJ	ALOMY7G39929
CC2R	Resistant	m64023e_220409_165810_135006564_ccs0	4050	gene						70	1304	-	CC2R_00001377				ALOMY1G07616
CC2R	Resistant	m64023e_220409_165810_135006564_ccs0	4050	gene						3507	3812	-	CC2R_00001378				ALOMY1G10043
CC2R	Resistant	m64023e_220409_165810_135072270_ccs	14126	gene						9365	9574	+	CC2R_00000276
CC2R	Resistant	m64023e_220409_165810_135072270_ccs	14126	gene						9871	10287	+	CC2R_00000277				ALOMY2G20844
CC2R	Resistant	m64023e_220409_165810_135072270_ccs	14126	gene						10374	10778	+	CC2R_00000278				ALOMY2G20844
CC2R	Resistant	m64023e_220409_165810_135072270_ccs	14126	gene						11171	11800	+	CC2R_00000279				ALOMY2G20844
CC2R	Resistant	m64023e_220409_165810_135072270_ccs	14126	gene						12068	12250	+	CC2R_00000280
CC2R	Resistant	m64023e_220409_165810_135202319_ccs	3395	gene						2236	3345	+	CC2R_00001424				ALOMY1G07946
CC2R	Resistant	m64023e_220409_165810_135268965_ccs	4280	gene						655	982	-	CC2R_00001350				ALOMY4G27580
CC2R	Resistant	m64023e_220409_165810_135268965_ccs	4280	gene						1068	1265	-	CC2R_00001351				ALOMY4G27580
CC2R	Resistant	m64023e_220409_165810_135529284_ccs	13204	gene						4648	5893	+	CC2R_00000355	PF03171	2OG-Fe(II) oxygenase superfamily	sp|Q40062|IDS3_HORVU	ALOMY2G20601
CC2R	Resistant	m64023e_220409_165810_135529284_ccs	13204	gene						11886	13202	-	CC2R_00000356			sp|Q9ZQC5|ICR2_ARATH	ALOMY2G20602
CC2R	Resistant	m64023e_220409_165810_135530838_ccs	12211	gene						10744	10989	-	CC2R_00000489				ALOMY6G42914
CC2R	Resistant	m64023e_220409_165810_136052859_ccs	18660	gene						7205	10252	+	CC2R_00000071				ALOMY4G28312
CC2R	Resistant	m64023e_220409_165810_136382762_ccs	7260	gene						723	4213	-	CC2R_00001089				ALOMY5G32141
CC2R	Resistant	m64023e_220409_165810_136511640_ccs0	2190	gene						13	516	-	CC2R_00001504	PF00006	ATP synthase alpha/beta family, nucleotide-binding domain	sp|A8Y9G7|ATPA_LOLPR	ALOMY0G46724
CC2R	Resistant	m64023e_220409_165810_136511640_ccs0	2190	gene						1124	2065	-	CC2R_00001505	PF00306	ATP synthase alpha/beta chain, C terminal domain	sp|Q6L3A1|ATPA_SACHY	ALOMY0G46724
CC2R	Resistant	m64023e_220409_165810_136511640_ccs01	2190	gene						1124	1471	-	CC2R_00001506	PF00006	ATP synthase alpha/beta family, nucleotide-binding domain	sp|A1EA05|ATPA_AGRST	ALOMY0G46724
CC2R	Resistant	m64023e_220409_165810_136710519_ccs	14872	gene						3396	5294	-	CC2R_00000221				ALOMY2G20844
CC2R	Resistant	m64023e_220409_165810_136710519_ccs	14872	gene						5352	5921	-	CC2R_00000222	PF04195	Putative gypsy type transposon		ALOMY2G20844
CC2R	Resistant	m64023e_220409_165810_136710519_ccs	14872	gene						5925	6332	-	CC2R_00000223				ALOMY2G20844
CC2R	Resistant	m64023e_220409_165810_136972095_ccs	17910	gene						7151	10871	-	CC2R_00000092	PF07732	Multicopper oxidase	sp|Q6Z8L2|LAC9_ORYSJ	ALOMY4G29592
CC2R	Resistant	m64023e_220409_165810_137102853_ccs	10980	gene						1707	2023	-	CC2R_00000653				ALOMY6G42914
CC2R	Resistant	m64023e_220409_165810_137298906_ccs	9780	gene						1773	2026	+	CC2R_00000812				ALOMY6G42914
CC2R	Resistant	m64023e_220409_165810_137365710_ccs	4601	gene						3178	3431	-	CC2R_00001325				ALOMY6G42914
CC2R	Resistant	m64023e_220409_165810_137430556_ccs	12955	gene						1286	3699	+	CC2R_00000396	PF18052	Rx N-terminal domain	sp|Q9SX38|DRL4_ARATH	ALOMY1G00011
CC2R	Resistant	m64023e_220409_165810_137430556_ccs	12955	gene						3716	5390	+	CC2R_00000397			sp|Q39214|RPM1_ARATH	ALOMY1G00011
CC2R	Resistant	m64023e_220409_165810_137496146_ccs	7959	gene						1992	2243	-	CC2R_00001012				ALOMY1G01069
CC2R	Resistant	m64023e_220409_165810_137496146_ccs	7959	gene						5300	6233	-	CC2R_00001013	PF00382	Transcription factor TFIIB repeat	sp|Q8W0W3|TF2B_ORYSJ	ALOMY5G32300
CC2R	Resistant	m64023e_220409_165810_137560639_ccs0	7380	gene						3445	5853	-	CC2R_00001079	PF00115	Cytochrome C and Quinol oxidase polypeptide I	sp|P20374|COX1_APILI	ALOMY2G21334
CC2R	Resistant	m64023e_220409_165810_137560639_ccs0	7380	gene						5923	6942	-	CC2R_00001080	PF03317	ELF protein		ALOMY2G21335
CC2R	Resistant	m64023e_220409_165810_137560639_ccs01	7344	gene						2060	4469	-	CC2R_00001084	PF00115	Cytochrome C and Quinol oxidase polypeptide I	sp|P20374|COX1_APILI	ALOMY2G21334
CC2R	Resistant	m64023e_220409_165810_137560639_ccs01	7344	gene						4539	5558	-	CC2R_00001085	PF03317	ELF protein		ALOMY2G21335
CC2R	Resistant	m64023e_220409_165810_137822601_ccs	10110	gene						30	1613	-	CC2R_00000774				ALOMY5G32141
CC2R	Resistant	m64023e_220409_165810_138087258_ccs	6152	gene						5519	5656	+	CC2R_00001195				ALOMY1G07781
CC2R	Resistant	m64023e_220409_165810_138150968_ccs	7230	gene						21	1046	-	CC2R_00001095	PF00223	Photosystem I psaA/psaB protein	sp|A1EA07|PSAB_AGRST	ALOMY0G46725
CC2R	Resistant	m64023e_220409_165810_138150968_ccs	7230	gene						1075	3277	-	CC2R_00001096	PF00223	Photosystem I psaA/psaB protein	sp|Q9T2L6|PSAA_SORBI	ALOMY0G46726
CC2R	Resistant	m64023e_220409_165810_138150968_ccs	7230	gene						5498	6614	+	CC2R_00001097	PF00515	Tetratricopeptide repeat	sp|A8Y9H1|YCF3_LOLPR	ALOMY0G46727
CC2R	Resistant	m64023e_220409_165810_138152346_ccs	11880	gene						3331	5291	-	CC2R_00000534				ALOMY5G31919
CC2R	Resistant	m64023e_220409_165810_139134955_ccs	8970	gene						6146	6837	+	CC2R_00000907				ALOMY2G17986
CC2R	Resistant	m64023e_220409_165810_139266514_ccs	11403	gene						7716	8048	-	CC2R_00000587	PF00069	Protein kinase domain	sp|Q9LW83|CE101_ARATH	ALOMY3G15109
CC2R	Resistant	m64023e_220409_165810_139330940_ccs	9000	gene						3782	4056	+	CC2R_00000904				ALOMY6G45318
CC2R	Resistant	m64023e_220409_165810_139527357_ccs	11400	gene						337	1189	+	CC2R_00000590	PF01357	Expansin C-terminal domain	sp|Q9XHX0|EXPA8_ORYSJ	ALOMY2G22630
CC2R	Resistant	m64023e_220409_165810_139985532_ccs	19776	gene						7941	10710	-	CC2R_00000051				ALOMY1G05155
CC2R	Resistant	m64023e_220409_165810_139985532_ccs	19776	gene						10729	11187	-	CC2R_00000052	PF04195	Putative gypsy type transposon		ALOMY1G05155
CC2R	Resistant	m64023e_220409_165810_140249264_ccs	9563	gene						2573	3670	+	CC2R_00000848				ALOMY0G48067
CC2R	Resistant	m64023e_220409_165810_140378164_ccs	9540	gene						3938	5816	+	CC2R_00000850				ALOMY7G41679
CC2R	Resistant	m64023e_220409_165810_140379569_ccs	6510	gene						3108	3737	+	CC2R_00001172				ALOMY5G31918
CC2R	Resistant	m64023e_220409_165810_140379569_ccs	6510	gene						4706	5377	+	CC2R_00001173				ALOMY5G31919
CC2R	Resistant	m64023e_220409_165810_140444119_ccs	16139	gene						3820	4263	-	CC2R_00000167				ALOMY5G31918
CC2R	Resistant	m64023e_220409_165810_140444119_ccs	16139	gene						6506	7714	+	CC2R_00000168				ALOMY3G16183
CC2R	Resistant	m64023e_220409_165810_140444119_ccs	16139	gene						8491	11622	-	CC2R_00000169				ALOMY3G12006
CC2R	Resistant	m64023e_220409_165810_140444119_ccs	16139	gene						13204	16122	-	CC2R_00000170	PF07059	Protein of unknown function (DUF1336)		ALOMY1G02330
CC2R	Resistant	m64023e_220409_165810_140445191_ccs	8070	gene						4213	4466	+	CC2R_00000991				ALOMY6G42914
CC2R	Resistant	m64023e_220409_165810_140641097_ccs	11940	gene						2803	3051	-	CC2R_00000528				ALOMY6G42914
CC2R	Resistant	m64023e_220409_165810_140707981_ccs	11910	gene						7531	7803	+	CC2R_00000532				ALOMY6G42914
CC2R	Resistant	m64023e_220409_165810_140772298_ccs01	1313	gene						36	233	+	CC2R_00001534				ALOMY0G47603
CC2R	Resistant	m64023e_220409_165810_140837757_ccs	7710	gene						3700	6746	+	CC2R_00001039	PF00491	Arginase family	sp|B8AU84|ARGI1_ORYSI	ALOMY3G16874
CC2R	Resistant	m64023e_220409_165810_141428133_ccs	16941	gene						56	1812	+	CC2R_00000133	PF01010	NADH-dehyrogenase subunit F, TMs, (complex I) C-terminus	sp|A8Y9D4|NU5C_LOLPR	ALOMY0G47048
CC2R	Resistant	m64023e_220409_165810_141428133_ccs	16941	gene						5787	6968	+	CC2R_00000134	PF00346	Respiratory-chain NADH dehydrogenase, 49 Kd subunit	sp|P0C337|NDHH_ORYSJ	ALOMY0G47042
CC2R	Resistant	m64023e_220409_165810_141428133_ccs	16941	gene						6970	9081	+	CC2R_00000135	PF00146	NADH dehydrogenase	sp|A1EA64|NU1C_AGRST	ALOMY0G47053
CC2R	Resistant	m64023e_220409_165810_141428133_ccs	16941	gene						9179	9720	+	CC2R_00000136	PF00037	4Fe-4S binding domain	sp|A1EA63|NDHI_AGRST	ALOMY0G47052
CC2R	Resistant	m64023e_220409_165810_141428133_ccs	16941	gene						9981	11029	+	CC2R_00000137	PF00499	NADH-ubiquinone/plastoquinone oxidoreductase chain 6	sp|Q95H44|NU6C_WHEAT	ALOMY0G47051
CC2R	Resistant	m64023e_220409_165810_141428133_ccs	16941	gene						11896	13398	+	CC2R_00000138	PF00361	Proton-conducting membrane transporter	sp|P58420|NU4C_WHEAT	ALOMY0G47050
CC2R	Resistant	m64023e_220409_165810_141428133_ccs	16941	gene						13547	14481	-	CC2R_00000139	PF01578	Cytochrome C assembly protein	sp|A1EA58|CCSA_AGRST	ALOMY0G47049
CC2R	Resistant	m64023e_220409_165810_141428322_ccs	10962	gene						3	311	-	CC2R_00000658	PF00499	NADH-ubiquinone/plastoquinone oxidoreductase chain 6	sp|Q95H44|NU6C_WHEAT	ALOMY0G47051
CC2R	Resistant	m64023e_220409_165810_141428322_ccs	10962	gene						573	1115	-	CC2R_00000659	PF13237	4Fe-4S dicluster domain	sp|A1EA63|NDHI_AGRST	ALOMY0G47052
CC2R	Resistant	m64023e_220409_165810_141428322_ccs	10962	gene						1213	4749	-	CC2R_00000660	PF00361	Proton-conducting membrane transporter	sp|A8Y9D4|NU5C_LOLPR	ALOMY0G47048
CC2R	Resistant	m64023e_220409_165810_141428322_ccs	10962	gene						6782	7711	+	CC2R_00000661	PF01578	Cytochrome C assembly protein	sp|A1EA58|CCSA_AGRST	ALOMY0G47049
CC2R	Resistant	m64023e_220409_165810_141428322_ccs	10962	gene						7861	9225	-	CC2R_00000662	PF00361	Proton-conducting membrane transporter	sp|P58420|NU4C_WHEAT	ALOMY0G47050
CC2R	Resistant	m64023e_220409_165810_141428322_ccs	10962	gene						10226	10393	-	CC2R_00000663	PF00420	NADH-ubiquinone/plastoquinone oxidoreductase chain 4L	sp|P69379|NU4LC_WHEAT	ALOMY0G47038
CC2R	Resistant	m64023e_220409_165810_141689855_ccs0	2760	gene						278	2104	-	CC2R_00001461	PF00069	Protein kinase domain	sp|Q0D5R2|CRK10_ORYSJ	ALOMY2G24038
CC2R	Resistant	m64023e_220409_165810_141822119_ccs	5998	gene						2384	5815	+	CC2R_00001212	PF04195	Putative gypsy type transposon		ALOMY2G20844
CC2R	Resistant	m64023e_220409_165810_141953376_ccs	9047	gene						6982	7998	+	CC2R_00000898				ALOMY0G46857
CC2R	Resistant	m64023e_220409_165810_142346599_ccs	19243	gene						8012	8928	+	CC2R_00000062				ALOMY1G05155
CC2R	Resistant	m64023e_220409_165810_142346599_ccs	19243	gene						9317	11688	+	CC2R_00000063				ALOMY5G32354
CC2R	Resistant	m64023e_220409_165810_142477117_ccs0	1740	gene						54	1441	-	CC2R_00001527				ALOMY7G39927
CC2R	Resistant	m64023e_220409_165810_142477117_ccs01	1740	gene						1336	1725	-	CC2R_00001526				ALOMY7G39927
CC2R	Resistant	m64023e_220409_165810_142607076_ccs0	2646	gene						42	2397	+	CC2R_00001470	PF00119	ATP synthase A chain	sp|A1EA02|ATPI_AGRST	ALOMY0G46723
CC2R	Resistant	m64023e_220409_165810_142607507_ccs	8717	gene						47	457	+	CC2R_00000928				ALOMY1G05119
CC2R	Resistant	m64023e_220409_165810_142607507_ccs	8717	gene						156	525	-	CC2R_00000929				ALOMY7G37154
CC2R	Resistant	m64023e_220409_165810_142607507_ccs	8717	gene						1152	2865	+	CC2R_00000930	PF01699	Sodium/calcium exchanger protein	sp|Q9FKP1|CCX1_ARATH	ALOMY5G32149
CC2R	Resistant	m64023e_220409_165810_142673278_ccs	6433	gene						2092	2784	+	CC2R_00001181				ALOMY2G24495
CC2R	Resistant	m64023e_220409_165810_142869237_ccs	16860	gene						2627	2875	+	CC2R_00000141				ALOMY6G42914
CC2R	Resistant	m64023e_220409_165810_142869868_ccs	26244	gene						7518	10445	-	CC2R_00000003	PF04195	Putative gypsy type transposon		ALOMY2G20844
CC2R	Resistant	m64023e_220409_165810_142869868_ccs	26244	gene						13629	14547	+	CC2R_00000004				ALOMY6G45496
CC2R	Resistant	m64023e_220409_165810_142869868_ccs	26244	gene						14552	16821	+	CC2R_00000005				ALOMY6G45496
CC2R	Resistant	m64023e_220409_165810_142869868_ccs	26244	gene						21221	23015	-	CC2R_00000006	PF03254	Xyloglucan fucosyltransferase	sp|Q9SWH5|FUT1_ARATH	ALOMY1G09049
CC2R	Resistant	m64023e_220409_165810_142936039_ccs01	7035	gene						6308	7015	+	CC2R_00001125				ALOMY2G24538
CC2R	Resistant	m64023e_220409_165810_143001042_ccs	9635	gene						2846	5281	+	CC2R_00000839	PF05142	Domain of unknown function (DUF702)	sp|Q94CK9|LRP1_ARATH	ALOMY5G33895	TF
CC2R	Resistant	m64023e_220409_165810_143131457_ccs0	5340	gene						4995	5168	+	CC2R_00001263
CC2R	Resistant	m64023e_220409_165810_143131457_ccs01	3930	gene						1542	1715	+	CC2R_00001385
CC2R	Resistant	m64023e_220409_165810_143788359_ccs	10108	gene						2922	3642	-	CC2R_00000775
CC2R	Resistant	m64023e_220409_165810_144180711_ccs	12466	gene						4642	5457	-	CC2R_00000452				ALOMY4G29304
CC2R	Resistant	m64023e_220409_165810_1442263_ccs	9810	gene						2741	3074	-	CC2R_00000809				ALOMY6G42832
CC2R	Resistant	m64023e_220409_165810_1442263_ccs	9810	gene						8004	9546	-	CC2R_00000810				ALOMY3G15899
CC2R	Resistant	m64023e_220409_165810_144245147_ccs	12420	gene						672	3643	+	CC2R_00000457	PF04195	Putative gypsy type transposon		ALOMY2G20844
CC2R	Resistant	m64023e_220409_165810_144310792_ccs01	5691	gene						2107	3962	+	CC2R_00001231				ALOMY1G05155
CC2R	Resistant	m64023e_220409_165810_144376683_ccs	14854	gene						4641	5456	-	CC2R_00000226				ALOMY4G29304
CC2R	Resistant	m64023e_220409_165810_144377321_ccs	11730	gene						17	1073	-	CC2R_00000540				ALOMY1G01848
CC2R	Resistant	m64023e_220409_165810_144377321_ccs	11730	gene						5650	6312	+	CC2R_00000541				ALOMY6G42914
CC2R	Resistant	m64023e_220409_165810_144378406_ccs	6060	gene						2028	4914	+	CC2R_00001201	PF07762	Protein of unknown function (DUF1618)		ALOMY6G45458
CC2R	Resistant	m64023e_220409_165810_1444241_ccs	12123	gene						106	1112	+	CC2R_00000504	PF00361	Proton-conducting membrane transporter	sp|P58420|NU4C_WHEAT	ALOMY0G47050
CC2R	Resistant	m64023e_220409_165810_1444241_ccs	12123	gene						1126	1482	+	CC2R_00000505			sp|P58420|NU4C_WHEAT	ALOMY0G47050
CC2R	Resistant	m64023e_220409_165810_1444241_ccs	12123	gene						1631	2560	-	CC2R_00000506	PF01578	Cytochrome C assembly protein	sp|A1EA58|CCSA_AGRST	ALOMY0G47049
CC2R	Resistant	m64023e_220409_165810_1444241_ccs	12123	gene						4589	8150	+	CC2R_00000507	PF00361	Proton-conducting membrane transporter	sp|Q32880|NU5C_POAPR	ALOMY0G47048
CC2R	Resistant	m64023e_220409_165810_1444241_ccs	12123	gene						8152	10266	+	CC2R_00000508	PF00146	NADH dehydrogenase	sp|A1EA64|NU1C_AGRST	ALOMY0G47053
CC2R	Resistant	m64023e_220409_165810_1444241_ccs	12123	gene						10364	10907	+	CC2R_00000509	PF00037	4Fe-4S binding domain	sp|A1EA63|NDHI_AGRST	ALOMY0G47052
CC2R	Resistant	m64023e_220409_165810_1444241_ccs	12123	gene						11169	11699	+	CC2R_00000510	PF00499	NADH-ubiquinone/plastoquinone oxidoreductase chain 6	sp|Q95H44|NU6C_WHEAT	ALOMY0G47051
CC2R	Resistant	m64023e_220409_165810_144508007_ccs	3711	gene						75	404	-	CC2R_00001403				ALOMY6G43674
CC2R	Resistant	m64023e_220409_165810_144508007_ccs	3711	gene						1936	2752	-	CC2R_00001404	PF01348	Type II intron maturase		ALOMY0G48384
CC2R	Resistant	m64023e_220409_165810_144574492_ccs	17098	gene						1	195	+	CC2R_00000125				ALOMY0G48942
CC2R	Resistant	m64023e_220409_165810_144574492_ccs	17098	gene						7535	8349	-	CC2R_00000126			sp|P48622|FAD3D_ARATH	ALOMY0G48943
CC2R	Resistant	m64023e_220409_165810_144574492_ccs	17098	gene						8646	9147	+	CC2R_00000127				ALOMY0G48942
CC2R	Resistant	m64023e_220409_165810_144574492_ccs	17098	gene						9739	15427	+	CC2R_00000128	PF07893	Protein of unknown function (DUF1668)		ALOMY3G10314
CC2R	Resistant	m64023e_220409_165810_144639132_ccs	12210	gene						1525	2696	-	CC2R_00000497	PF00332	Glycosyl hydrolases family 17	sp|P49237|E13B_MAIZE	ALOMY2G18733
CC2R	Resistant	m64023e_220409_165810_144704403_ccs	9925	gene						8239	8487	-	CC2R_00000792				ALOMY6G42914
CC2R	Resistant	m64023e_220409_165810_144771116_ccs	3990	gene						28	1261	+	CC2R_00001380	PF00119	ATP synthase A chain	sp|A1EA02|ATPI_AGRST	ALOMY0G46723
CC2R	Resistant	m64023e_220409_165810_144901594_ccs	13848	gene						9871	12628	-	CC2R_00000296	PF02182	SAD/SRA domain	sp|Q8VYZ0|ORTH2_ARATH	ALOMY5G36905
CC2R	Resistant	m64023e_220409_165810_144967256_ccs	3270	gene						491	2986	+	CC2R_00001434				ALOMY5G34152
CC2R	Resistant	m64023e_220409_165810_145097933_ccs	3769	gene						1790	2299	-	CC2R_00001402	PF13456	Reverse transcriptase-like		ALOMY3G15987
CC2R	Resistant	m64023e_220409_165810_145098858_ccs	7110	gene						1806	2514	-	CC2R_00001109				ALOMY1G00307
CC2R	Resistant	m64023e_220409_165810_145229566_ccs	4424	gene						323	1590	+	CC2R_00001339			sp|Q40316|VESTR_MEDSA	ALOMY3G15594
CC2R	Resistant	m64023e_220409_165810_145360422_ccs	2460	gene						1528	1812	+	CC2R_00001486				ALOMY7G41032
CC2R	Resistant	m64023e_220409_165810_145491423_ccs	3510	gene						1235	2938	-	CC2R_00001415	PF00318	Ribosomal protein S2	sp|A1EA02|ATPI_AGRST	ALOMY0G46723
CC2R	Resistant	m64023e_220409_165810_145883363_ccs0	2220	gene						32	279	+	CC2R_00001502				ALOMY6G42914
CC2R	Resistant	m64023e_220409_165810_146079856_ccs	13800	gene						5327	5743	+	CC2R_00000297				ALOMY2G22305
CC2R	Resistant	m64023e_220409_165810_14615728_ccs	12927	gene						9427	9678	+	CC2R_00000398				ALOMY6G42914
CC2R	Resistant	m64023e_220409_165810_147065378_ccs	22358	gene						4474	5956	-	CC2R_00000016				ALOMY3G15381
CC2R	Resistant	m64023e_220409_165810_147065378_ccs	22358	gene						6007	6555	-	CC2R_00000017				ALOMY1G00446
CC2R	Resistant	m64023e_220409_165810_147065425_ccs	11375	gene						7145	10068	+	CC2R_00000592				ALOMY1G05155
CC2R	Resistant	m64023e_220409_165810_147065425_ccs	11375	gene						10125	10334	+	CC2R_00000593				ALOMY1G06605
CC2R	Resistant	m64023e_220409_165810_147130721_ccs	2756	gene						281	1213	+	CC2R_00001464	PF00146	NADH dehydrogenase	sp|A1EA64|NU1C_AGRST	ALOMY6G44543
CC2R	Resistant	m64023e_220409_165810_147130721_ccs	2756	gene						1314	1856	+	CC2R_00001465	PF13237	4Fe-4S dicluster domain	sp|A1EA63|NDHI_AGRST	ALOMY0G47052
CC2R	Resistant	m64023e_220409_165810_147130721_ccs	2756	gene						2118	2648	+	CC2R_00001466	PF00499	NADH-ubiquinone/plastoquinone oxidoreductase chain 6	sp|Q95H44|NU6C_WHEAT	ALOMY0G47051
CC2R	Resistant	m64023e_220409_165810_147325912_ccs	13461	gene						10506	10757	-	CC2R_00000337
CC2R	Resistant	m64023e_220409_165810_147390990_ccs	5961	gene						271	3537	-	CC2R_00001214	PF04195	Putative gypsy type transposon		ALOMY1G05155
CC2R	Resistant	m64023e_220409_165810_147720143_ccs0	7710	gene						3261	4238	-	CC2R_00001042	PF07690	Major Facilitator Superfamily	sp|P0DKH0|NRT22_ORYSJ	ALOMY4G30995
CC2R	Resistant	m64023e_220409_165810_147785119_ccs	12210	gene						4365	7062	-	CC2R_00000498				ALOMY7G39957
CC2R	Resistant	m64023e_220409_165810_148046823_ccs	9810	gene						6072	6320	-	CC2R_00000811				ALOMY6G42914
CC2R	Resistant	m64023e_220409_165810_14811361_ccs	10031	gene						3913	4488	+	CC2R_00000785				ALOMY4G29304
CC2R	Resistant	m64023e_220409_165810_14813857_ccs	8010	gene						283	844	-	CC2R_00000997				ALOMY2G20844
CC2R	Resistant	m64023e_220409_165810_14813857_ccs	8010	gene						890	3021	-	CC2R_00000998				ALOMY2G20844
CC2R	Resistant	m64023e_220409_165810_14813857_ccs	8010	gene						3115	3378	-	CC2R_00000999				ALOMY2G20844
CC2R	Resistant	m64023e_220409_165810_148177663_ccs	12913	gene						9915	10965	+	CC2R_00000399				ALOMY5G36259
CC2R	Resistant	m64023e_220409_165810_148177663_ccs	12913	gene						10982	12873	+	CC2R_00000400	PF00069	Protein kinase domain	sp|P51139|MSK3_MEDSA	ALOMY5G36260
CC2R	Resistant	m64023e_220409_165810_14879397_ccs	8250	gene						4211	4498	-	CC2R_00000979				ALOMY2G24787
CC2R	Resistant	m64023e_220409_165810_14879397_ccs	8250	gene						6105	7974	-	CC2R_00000980	PF00161	Ribosome inactivating protein	sp|P25892|RIP9_MAIZE	ALOMY7G41958
CC2R	Resistant	m64023e_220409_165810_148965631_ccs	16150	gene						1539	3993	-	CC2R_00000166				ALOMY5G31919
CC2R	Resistant	m64023e_220409_165810_148965829_ccs	7560	gene						4228	4401	-	CC2R_00001063
CC2R	Resistant	m64023e_220409_165810_149029426_ccs	8310	gene						3192	4144	+	CC2R_00000969	PF01612	3'-5' exonuclease		ALOMY4G30212
CC2R	Resistant	m64023e_220409_165810_149029489_ccs	14187	gene						8995	12322	+	CC2R_00000270				ALOMY0G48057
CC2R	Resistant	m64023e_220409_165810_149030573_ccs	5412	gene						5018	5395	-	CC2R_00001257				ALOMY3G13927
CC2R	Resistant	m64023e_220409_165810_149293243_ccs	3690	gene						1267	3667	-	CC2R_00001406				ALOMY5G32354
CC2R	Resistant	m64023e_220409_165810_149423498_ccs	9300	gene						80	1444	+	CC2R_00000876				ALOMY2G20844
CC2R	Resistant	m64023e_220409_165810_149423498_ccs	9300	gene						7780	9170	+	CC2R_00000877				ALOMY2G20844
CC2R	Resistant	m64023e_220409_165810_149424024_ccs	9089	gene						224	2263	-	CC2R_00000891				ALOMY5G33171
CC2R	Resistant	m64023e_220409_165810_149424024_ccs	9089	gene						2411	3053	-	CC2R_00000892				ALOMY6G43007
CC2R	Resistant	m64023e_220409_165810_149424024_ccs	9089	gene						4034	4219	+	CC2R_00000893	PF02519	Auxin responsive protein	sp|Q9SGU2|SAU71_ARATH	ALOMY3G11812
CC2R	Resistant	m64023e_220409_165810_149555986_ccs	4705	gene						513	1224	+	CC2R_00001317	PF18306	SLOG cluster4 family	sp|Q5ZC82|LOG_ORYSJ	ALOMY1G09816
CC2R	Resistant	m64023e_220409_165810_149751222_ccs	11374	gene						4308	4556	-	CC2R_00000594				ALOMY6G42914
CC2R	Resistant	m64023e_220409_165810_149751825_ccs	13942	gene						6755	9837	+	CC2R_00000290				ALOMY2G20844
CC2R	Resistant	m64023e_220409_165810_149883260_ccs	17709	gene						16342	17592	-	CC2R_00000097				ALOMY5G31480
CC2R	Resistant	m64023e_220409_165810_149883352_ccs	6739	gene						6176	6424	-	CC2R_00001154				ALOMY6G42914
CC2R	Resistant	m64023e_220409_165810_149947457_ccs	5295	gene						4422	5271	-	CC2R_00001267				ALOMY1G02449
CC2R	Resistant	m64023e_220409_165810_149948797_ccs	10807	gene						4194	4442	-	CC2R_00000679				ALOMY6G42914
CC2R	Resistant	m64023e_220409_165810_150209566_ccs	11490	gene						6539	9526	-	CC2R_00000579	PF13837	Myb/SANT-like DNA-binding domain	sp|Q39117|TGT2_ARATH	ALOMY4G29487	TF
CC2R	Resistant	m64023e_220409_165810_150471792_ccs	2100	gene						777	1022	-	CC2R_00001510
CC2R	Resistant	m64023e_220409_165810_150603360_ccs	13398	gene						5304	8238	-	CC2R_00000342	PF04195	Putative gypsy type transposon		ALOMY2G20844
CC2R	Resistant	m64023e_220409_165810_151060825_ccs	8730	gene						3853	7063	-	CC2R_00000925	PF04195	Putative gypsy type transposon		ALOMY2G20844
CC2R	Resistant	m64023e_220409_165810_151652160_ccs	10560	gene						115	2008	+	CC2R_00000721	PF00361	Proton-conducting membrane transporter	sp|P0CD05|NU2C2_NYMAL	ALOMY0G46718
CC2R	Resistant	m64023e_220409_165810_151652160_ccs	10560	gene						2680	4296	-	CC2R_00000722	PF10705	Chloroplast protein precursor Ycf15 putative	sp|Q6ENR3|YCF15_SACOF	ALOMY7G37953
CC2R	Resistant	m64023e_220409_165810_151652160_ccs	10560	gene						5071	5836	+	CC2R_00000723	PF00181	Ribosomal Proteins L2, RNA binding domain	sp|A8Y9C8|RK2_LOLPR	ALOMY0G47044
CC2R	Resistant	m64023e_220409_165810_151652160_ccs	10560	gene						6788	7316	+	CC2R_00000724	PF00203	Ribosomal protein S19	sp|P11534|RK2_WHEAT	ALOMY2G21925
CC2R	Resistant	m64023e_220409_165810_151716704_ccs	14130	gene						1971	5185	-	CC2R_00000275	PF04195	Putative gypsy type transposon		ALOMY1G05155
CC2R	Resistant	m64023e_220409_165810_151979148_ccs	12752	gene						12248	12448	+	CC2R_00000414				ALOMY6G43565
CC2R	Resistant	m64023e_220409_165810_152043991_ccs	19050	gene						10607	13051	+	CC2R_00000064	PF03283	Pectinacetylesterase	sp|Q6DBP4|PAE8_ARATH	ALOMY4G27583
CC2R	Resistant	m64023e_220409_165810_152044683_ccs	7471	gene						2930	4129	+	CC2R_00001071	PF00651	BTB/POZ domain	sp|Q9M8J9|BPM2_ARATH	ALOMY1G01553	TR
CC2R	Resistant	m64023e_220409_165810_152045720_ccs	18693	gene						7962	11443	-	CC2R_00000068				ALOMY1G05155
CC2R	Resistant	m64023e_220409_165810_152046290_ccs	15780	gene						1335	3457	-	CC2R_00000180				ALOMY5G31919
CC2R	Resistant	m64023e_220409_165810_152046290_ccs	15780	gene						5869	6115	-	CC2R_00000181				ALOMY1G01488
CC2R	Resistant	m64023e_220409_165810_152372941_ccs	19267	gene						9779	12895	-	CC2R_00000061	PF04195	Putative gypsy type transposon		ALOMY2G20844
CC2R	Resistant	m64023e_220409_165810_152438928_ccs	8837	gene						4278	7941	-	CC2R_00000918	PF00664	ABC transporter transmembrane region	sp|O80725|AB4B_ARATH	ALOMY4G30297
CC2R	Resistant	m64023e_220409_165810_152634348_ccs	10851	gene						544	1359	+	CC2R_00000671				ALOMY4G29304
CC2R	Resistant	m64023e_220409_165810_15271166_ccs	12452	gene						5156	6035	+	CC2R_00000454				ALOMY6G43009
CC2R	Resistant	m64023e_220409_165810_152831637_ccs0	4650	gene						308	1216	+	CC2R_00001319	PF05514	HR-like lesion-inducing		ALOMY2G19354
CC2R	Resistant	m64023e_220409_165810_152831716_ccs	12090	gene						698	1261	-	CC2R_00000514	PF00234	Protease inhibitor/seed storage/LTP family	sp|Q43766|NLTP3_HORVU	ALOMY6G43042
CC2R	Resistant	m64023e_220409_165810_152831716_ccs	12090	gene						2557	3411	+	CC2R_00000515				ALOMY7G38439
CC2R	Resistant	m64023e_220409_165810_153028443_ccs	9185	gene						5745	9049	+	CC2R_00000881	PF04195	Putative gypsy type transposon		ALOMY1G05155
CC2R	Resistant	m64023e_220409_165810_153354619_ccs	4125	gene						545	3533	-	CC2R_00001372				ALOMY5G32141
CC2R	Resistant	m64023e_220409_165810_153356833_ccs	11610	gene						510	1753	+	CC2R_00000565	PF00295	Glycosyl hydrolases family 28	sp|O23147|ADPG1_ARATH	ALOMY1G01400
CC2R	Resistant	m64023e_220409_165810_153356833_ccs	11610	gene						2513	9425	-	CC2R_00000566	PF03552	Cellulose synthase	sp|Q84M43|CESA2_ORYSJ	ALOMY1G01398
CC2R	Resistant	m64023e_220409_165810_153812999_ccs	3030	gene						48	2835	+	CC2R_00001448	PF00276	Ribosomal protein L23	sp|P69668|RK23_HORVU	ALOMY2G21929
CC2R	Resistant	m64023e_220409_165810_154142737_ccs	8723	gene						204	7497	+	CC2R_00000927	PF00136	DNA polymerase family B	sp|Q766Z3|REV3_ARATH	ALOMY3G16398
CC2R	Resistant	m64023e_220409_165810_154338229_ccs	5790	gene						3682	5105	+	CC2R_00001225	PF00106	short chain dehydrogenase	sp|A4UHT7|SALR_PAPBR	ALOMY3G12612
CC2R	Resistant	m64023e_220409_165810_154338624_ccs	15076	gene						2996	3299	+	CC2R_00000207
CC2R	Resistant	m64023e_220409_165810_154338624_ccs	15076	gene						5724	6425	-	CC2R_00000208				ALOMY2G22866
CC2R	Resistant	m64023e_220409_165810_15468496_ccs	11525	gene						336	1890	+	CC2R_00000576				ALOMY7G38152
CC2R	Resistant	m64023e_220409_165810_154927616_ccs	7080	gene						572	772	+	CC2R_00001118			sp|P58257|YCF3_WHEAT	ALOMY0G46727
CC2R	Resistant	m64023e_220409_165810_154927616_ccs	7080	gene						4265	5798	+	CC2R_00001119	PF00163	Ribosomal protein S4/S9 N-terminal domain	sp|A1EA10|RR4_AGRST	ALOMY0G46728
CC2R	Resistant	m64023e_220409_165810_154927616_ccs	7080	gene						6722	6970	+	CC2R_00001120	PF00515	Tetratricopeptide repeat	sp|A8Y9H1|YCF3_LOLPR	ALOMY0G46727
CC2R	Resistant	m64023e_220409_165810_155844726_ccs	9600	gene						2007	2057	-	CC2R_00000846
CC2R	Resistant	m64023e_220409_165810_156108158_ccs	2466	gene						310	965	-	CC2R_00001484				ALOMY5G32863
CC2R	Resistant	m64023e_220409_165810_156108757_ccs	8536	gene						168	2841	+	CC2R_00000943	PF04195	Putative gypsy type transposon		ALOMY1G05155
CC2R	Resistant	m64023e_220409_165810_156108757_ccs	8536	gene						2902	3147	+	CC2R_00000944				ALOMY1G06605
CC2R	Resistant	m64023e_220409_165810_156108757_ccs	8536	gene						3149	3358	+	CC2R_00000945				ALOMY1G06605
CC2R	Resistant	m64023e_220409_165810_156237840_ccs0	4380	gene						1528	1961	-	CC2R_00001343				ALOMY2G18655
CC2R	Resistant	m64023e_220409_165810_156237840_ccs01	7249	gene						317	1281	-	CC2R_00001091				ALOMY2G18655
CC2R	Resistant	m64023e_220409_165810_156369926_ccs	8018	gene						5623	6159	+	CC2R_00000994	PF00888	Cullin family	sp|Q9ZVH4|CUL3A_ARATH	ALOMY3G11214
CC2R	Resistant	m64023e_220409_165810_156370830_ccs	11070	gene						2400	6373	+	CC2R_00000642				ALOMY5G31919
CC2R	Resistant	m64023e_220409_165810_156566441_ccs	14359	gene						5691	9527	-	CC2R_00000252	PF01756	Acyl-CoA oxidase	sp|O65201|ACOX2_ARATH	ALOMY4G26345
CC2R	Resistant	m64023e_220409_165810_156567985_ccs	12180	gene						4877	7771	-	CC2R_00000500				ALOMY1G05155
CC2R	Resistant	m64023e_220409_165810_156567985_ccs	12180	gene						8243	8496	-	CC2R_00000501				ALOMY6G42914
CC2R	Resistant	m64023e_220409_165810_15664204_ccs	6097	gene						2473	2817	-	CC2R_00001197				ALOMY2G20957
CC2R	Resistant	m64023e_220409_165810_156697334_ccs	13182	gene						493	786	-	CC2R_00000359
CC2R	Resistant	m64023e_220409_165810_156697334_ccs	13182	gene						3543	3819	-	CC2R_00000360				ALOMY2G20844
CC2R	Resistant	m64023e_220409_165810_156697334_ccs	13182	gene						3822	5111	-	CC2R_00000361				ALOMY2G20844
CC2R	Resistant	m64023e_220409_165810_156697334_ccs	13182	gene						5659	6094	-	CC2R_00000362				ALOMY2G20844
CC2R	Resistant	m64023e_220409_165810_156697334_ccs	13182	gene						6112	7728	-	CC2R_00000363				ALOMY2G20844
CC2R	Resistant	m64023e_220409_165810_156697334_ccs	13182	gene						7793	8909	-	CC2R_00000364	PF04195	Putative gypsy type transposon		ALOMY2G20844
CC2R	Resistant	m64023e_220409_165810_157092320_ccs01	2277	gene						1140	1845	-	CC2R_00001501				ALOMY2G24538
CC2R	Resistant	m64023e_220409_165810_157221628_ccs	7200	gene						1613	3132	+	CC2R_00001100	PF03650	Mitochondrial pyruvate carriers	sp|Q949R9|MPC1_ARATH	ALOMY3G13002
CC2R	Resistant	m64023e_220409_165810_157221628_ccs	7200	gene						4407	6401	+	CC2R_00001101	PF13968	Domain of unknown function (DUF4220)		ALOMY3G13001
CC2R	Resistant	m64023e_220409_165810_157287240_ccs	14010	gene						1574	2389	-	CC2R_00000289				ALOMY4G29304
CC2R	Resistant	m64023e_220409_165810_157353908_ccs	9630	gene						5975	7945	+	CC2R_00000841				ALOMY5G31919
CC2R	Resistant	m64023e_220409_165810_157616266_ccs01	7058	gene						4863	5812	+	CC2R_00001122	PF04195	Putative gypsy type transposon		ALOMY2G20844
CC2R	Resistant	m64023e_220409_165810_157616266_ccs01	7058	gene						5914	6556	+	CC2R_00001123				ALOMY2G20844
CC2R	Resistant	m64023e_220409_165810_157616266_ccs01	7058	gene						6627	6966	+	CC2R_00001124				ALOMY2G20844
CC2R	Resistant	m64023e_220409_165810_157747907_ccs	9330	gene						1025	3439	-	CC2R_00000873				ALOMY7G39957
CC2R	Resistant	m64023e_220409_165810_157876856_ccs0101	10571	gene						6078	9727	-	CC2R_00000718				ALOMY5G32141
CC2R	Resistant	m64023e_220409_165810_157942491_ccs	10656	gene						5375	7027	+	CC2R_00000694				ALOMY4G25766
CC2R	Resistant	m64023e_220409_165810_157942491_ccs	10656	gene						5544	7282	-	CC2R_00000695				ALOMY4G29444
CC2R	Resistant	m64023e_220409_165810_158007302_ccs	4202	gene						757	1014	+	CC2R_00001364				ALOMY1G07766
CC2R	Resistant	m64023e_220409_165810_158466480_ccs	6513	gene						1536	1709	-	CC2R_00001170
CC2R	Resistant	m64023e_220409_165810_158532692_ccs	12690	gene						2398	3758	-	CC2R_00000423				ALOMY2G18379
CC2R	Resistant	m64023e_220409_165810_158597245_ccs	5730	gene						5031	5249	-	CC2R_00001230				ALOMY2G24229
CC2R	Resistant	m64023e_220409_165810_158795143_ccs	10170	gene						5294	8422	+	CC2R_00000761	PF03547	Membrane transport protein	sp|Q651V6|PIN2_ORYSJ	ALOMY1G07581
CC2R	Resistant	m64023e_220409_165810_158859940_ccs	14730	gene						10342	10658	+	CC2R_00000232				ALOMY6G42914
CC2R	Resistant	m64023e_220409_165810_158992734_ccs	9780	gene						15	565	-	CC2R_00000813	PF00223	Photosystem I psaA/psaB protein	sp|A0A334|PSAB_COFAR	ALOMY0G46725
CC2R	Resistant	m64023e_220409_165810_158992734_ccs	9780	gene						591	2582	-	CC2R_00000814	PF00223	Photosystem I psaA/psaB protein	sp|P58311|PSAA_WHEAT	ALOMY0G46726
CC2R	Resistant	m64023e_220409_165810_158992734_ccs	9780	gene						3492	4606	-	CC2R_00000815	PF00515	Tetratricopeptide repeat	sp|A8Y9H1|YCF3_LOLPR	ALOMY0G46727
CC2R	Resistant	m64023e_220409_165810_158992734_ccs	9780	gene						6457	7062	-	CC2R_00000816	PF01479	S4 domain	sp|A1EA10|RR4_AGRST	ALOMY0G46728
CC2R	Resistant	m64023e_220409_165810_159124139_ccs0	1590	gene						1123	1182	+	CC2R_00001531
CC2R	Resistant	m64023e_220409_165810_15925341_ccs	17100	gene						1932	2861	+	CC2R_00000120	PF01578	Cytochrome C assembly protein	sp|A1EA58|CCSA_AGRST	ALOMY0G47049
CC2R	Resistant	m64023e_220409_165810_15925341_ccs	17100	gene						3011	4375	-	CC2R_00000121	PF00361	Proton-conducting membrane transporter	sp|P58420|NU4C_WHEAT	ALOMY0G47050
CC2R	Resistant	m64023e_220409_165810_15925341_ccs	17100	gene						4900	11896	-	CC2R_00000122	PF00346	Respiratory-chain NADH dehydrogenase, 49 Kd subunit	sp|P0C337|NDHH_ORYSJ	ALOMY0G47042
CC2R	Resistant	m64023e_220409_165810_15925341_ccs	17100	gene						13201	16381	-	CC2R_00000123	PF00361	Proton-conducting membrane transporter	sp|Q32880|NU5C_POAPR	ALOMY0G47048
CC2R	Resistant	m64023e_220409_165810_159778514_ccs	13560	gene						7117	8451	+	CC2R_00000319				ALOMY1G08005
CC2R	Resistant	m64023e_220409_165810_159908704_ccs	10345	gene						8703	9192	-	CC2R_00000741				ALOMY4G25356
CC2R	Resistant	m64023e_220409_165810_15992452_ccs	5242	gene						2775	3392	+	CC2R_00001273				ALOMY1G06810
CC2R	Resistant	m64023e_220409_165810_15992489_ccs	12098	gene						1304	2049	+	CC2R_00000511	PF01578	Cytochrome C assembly protein	sp|A1EA58|CCSA_AGRST	ALOMY0G47049
CC2R	Resistant	m64023e_220409_165810_15992489_ccs	12098	gene						2225	3589	-	CC2R_00000512	PF00361	Proton-conducting membrane transporter	sp|P58420|NU4C_WHEAT	ALOMY0G47050
CC2R	Resistant	m64023e_220409_165810_15992489_ccs	12098	gene						4117	10607	-	CC2R_00000513	PF00361	Proton-conducting membrane transporter	sp|Q32880|NU5C_POAPR	ALOMY0G47048
CC2R	Resistant	m64023e_220409_165810_160434276_ccs	14160	gene						10621	13593	-	CC2R_00000272	PF04195	Putative gypsy type transposon		ALOMY2G20844
CC2R	Resistant	m64023e_220409_165810_160499050_ccs	5550	gene						4766	5317	-	CC2R_00001244	PF00623	RNA polymerase Rpb1, domain 2	sp|A8Y9G1|RPOC1_LOLPR	ALOMY1G02759
CC2R	Resistant	m64023e_220409_165810_160564703_ccs	10090	gene						8697	10067	-	CC2R_00000776				ALOMY1G06605
CC2R	Resistant	m64023e_220409_165810_160958695_ccs	12296	gene						8321	9136	-	CC2R_00000475				ALOMY4G29304
CC2R	Resistant	m64023e_220409_165810_161153902_ccs00	3090	gene						405	790	+	CC2R_00001443				ALOMY1G02013
CC2R	Resistant	m64023e_220409_165810_161417216_ccs	13721	gene						11170	13438	+	CC2R_00000304	PF00156	Phosphoribosyl transferase domain	sp|Q43199|APT1_WHEAT	ALOMY7G37902
CC2R	Resistant	m64023e_220409_165810_161483465_ccs	6780	gene						147	4353	+	CC2R_00001147	PF00329	Respiratory-chain NADH dehydrogenase, 30 Kd subunit	sp|A8Y9H4|NDHK_LOLPR	ALOMY3G14315
CC2R	Resistant	m64023e_220409_165810_161483465_ccs	6780	gene						3758	4006	-	CC2R_00001148	PF00515	Tetratricopeptide repeat	sp|A8Y9H1|YCF3_LOLPR	ALOMY0G46727
CC2R	Resistant	m64023e_220409_165810_161483465_ccs	6780	gene						5857	6462	-	CC2R_00001149	PF01479	S4 domain	sp|A1EA10|RR4_AGRST	ALOMY0G46728
CC2R	Resistant	m64023e_220409_165810_161547295_ccs01	14857	gene						6678	6914	+	CC2R_00000224				ALOMY1G01199
CC2R	Resistant	m64023e_220409_165810_161547295_ccs01	14857	gene						10634	13812	+	CC2R_00000225				ALOMY1G05155
CC2R	Resistant	m64023e_220409_165810_161612452_ccs	5880	gene						911	4673	+	CC2R_00001219			sp|Q9SDN0|DNJ20_ARATH	ALOMY5G36020
CC2R	Resistant	m64023e_220409_165810_161874991_ccs	7292	gene						4972	5470	+	CC2R_00001087				ALOMY1G00446
CC2R	Resistant	m64023e_220409_165810_16188565_ccs	17100	gene						189	6375	+	CC2R_00000124	PF12796	Ankyrin repeats (3 copies)	sp|Q60J38|ANKHM_CAEBR	ALOMY1G04709
CC2R	Resistant	m64023e_220409_165810_162005984_ccs	20700	gene						8219	9214	-	CC2R_00000034				ALOMY2G20844
CC2R	Resistant	m64023e_220409_165810_162071148_ccs	6330	gene						2529	2750	-	CC2R_00001186				ALOMY7G37679
CC2R	Resistant	m64023e_220409_165810_162465593_ccs	8910	gene						6601	6850	-	CC2R_00000913				ALOMY6G42914
CC2R	Resistant	m64023e_220409_165810_162529796_ccs	9017	gene						6901	9011	+	CC2R_00000903	PF04195	Putative gypsy type transposon		ALOMY1G05155
CC2R	Resistant	m64023e_220409_165810_162597718_ccs0	1680	gene						1033	1272	-	CC2R_00001530				ALOMY7G38988
CC2R	Resistant	m64023e_220409_165810_163121807_ccs	12270	gene						5138	6537	-	CC2R_00000480	PF02458	Transferase family	sp|Q6E593|BEBT1_PETHY	ALOMY3G16725
CC2R	Resistant	m64023e_220409_165810_16320553_ccs0	5430	gene						463	4979	+	CC2R_00001256	PF02902	Ulp1 protease family, C-terminal catalytic domain	sp|Q94F30|ESD4_ARATH	ALOMY2G22830
CC2R	Resistant	m64023e_220409_165810_163317708_ccs	6490	gene						4678	6460	-	CC2R_00001174				ALOMY2G20844
CC2R	Resistant	m64023e_220409_165810_163382177_ccs	5565	gene						1568	2143	-	CC2R_00001243			sp|Q8LN49|RIP5_ORYSJ	ALOMY3G16505
CC2R	Resistant	m64023e_220409_165810_163446895_ccs	3780	gene						1322	1834	+	CC2R_00001401				ALOMY6G42675	TF
CC2R	Resistant	m64023e_220409_165810_163512450_ccs	8370	gene						502	3523	-	CC2R_00000963	PF00361	Proton-conducting membrane transporter	sp|P0CD17|NU2C2_ORYNI	ALOMY4G30249
CC2R	Resistant	m64023e_220409_165810_163512450_ccs	8370	gene						5018	5719	-	CC2R_00000964	PF00181	Ribosomal Proteins L2, RNA binding domain	sp|A8Y9C8|RK2_LOLPR	ALOMY0G47044
CC2R	Resistant	m64023e_220409_165810_163512450_ccs	8370	gene						6559	8176	+	CC2R_00000965	PF10705	Chloroplast protein precursor Ycf15 putative	sp|Q6ENR3|YCF15_SACOF	ALOMY7G37953
CC2R	Resistant	m64023e_220409_165810_163643835_ccs	9840	gene						97	2988	-	CC2R_00000806	PF00285	Citrate synthase, C-terminal domain	sp|P20115|CISY4_ARATH	ALOMY4G28962
CC2R	Resistant	m64023e_220409_165810_163643835_ccs	9840	gene						7311	9416	-	CC2R_00000807	PF00285	Citrate synthase, C-terminal domain	sp|O80433|CISY_DAUCA	ALOMY4G28962
CC2R	Resistant	m64023e_220409_165810_163971202_ccs	6839	gene						1121	2443	-	CC2R_00001144	PF02545	Maf-like protein	sp|Q54TC5|NTPPB_DICDI	ALOMY1G02788
CC2R	Resistant	m64023e_220409_165810_164103578_ccs	10890	gene						8833	9082	-	CC2R_00000670				ALOMY6G42914
CC2R	Resistant	m64023e_220409_165810_164366802_ccs	7980	gene						760	1384	+	CC2R_00001006	PF02788	Ribulose bisphosphate carboxylase large chain, N-terminal domain	sp|A8Y9H8|RBL_LOLPR	ALOMY6G46021
CC2R	Resistant	m64023e_220409_165810_164366802_ccs	7980	gene						2434	6251	-	CC2R_00001007	PF00329	Respiratory-chain NADH dehydrogenase, 30 Kd subunit	sp|A8Y9H4|NDHK_LOLPR	ALOMY3G14315
CC2R	Resistant	m64023e_220409_165810_164366802_ccs	7980	gene						6418	7910	-	CC2R_00001008	PF00006	ATP synthase alpha/beta family, nucleotide-binding domain	sp|P00828|ATPB_HORVU	ALOMY0G46729
CC2R	Resistant	m64023e_220409_165810_164562059_ccs	8306	gene						25	2113	-	CC2R_00000970				ALOMY1G05155
CC2R	Resistant	m64023e_220409_165810_164562115_ccs	13170	gene						4678	4941	+	CC2R_00000365				ALOMY1G03184
CC2R	Resistant	m64023e_220409_165810_165022110_ccs	11019	gene						5172	6203	+	CC2R_00000649	PF00685	Sulfotransferase domain	sp|Q8L5A7|SOT15_ARATH	ALOMY7G37974
CC2R	Resistant	m64023e_220409_165810_165216727_ccs01	1909	gene						215	1230	-	CC2R_00001518	PF00124	Photosynthetic reaction centre protein	sp|P05337|PSBA_HORVU	ALOMY0G46720
CC2R	Resistant	m64023e_220409_165810_165677399_ccs	5938	gene						2872	3060	-	CC2R_00001215	PF03547	Membrane transport protein	sp|Q9FFD0|PIN5_ARATH	ALOMY6G42625
CC2R	Resistant	m64023e_220409_165810_165806995_ccs	5640	gene						883	2434	+	CC2R_00001236				ALOMY1G08851
CC2R	Resistant	m64023e_220409_165810_16583075_ccs	7500	gene						927	1319	-	CC2R_00001067				ALOMY1G02644
CC2R	Resistant	m64023e_220409_165810_166332603_ccs	6270	gene						205	1730	-	CC2R_00001188	PF00499	NADH-ubiquinone/plastoquinone oxidoreductase chain 6	sp|Q95H44|NU6C_WHEAT	ALOMY0G47051
CC2R	Resistant	m64023e_220409_165810_166332603_ccs	6270	gene						3503	4432	+	CC2R_00001189	PF01578	Cytochrome C assembly protein	sp|A1EA58|CCSA_AGRST	ALOMY0G47049
CC2R	Resistant	m64023e_220409_165810_166332603_ccs	6270	gene						4581	5945	-	CC2R_00001190	PF00361	Proton-conducting membrane transporter	sp|P58420|NU4C_WHEAT	ALOMY0G47050
CC2R	Resistant	m64023e_220409_165810_166529027_ccs	10080	gene						9704	10039	+	CC2R_00000777				ALOMY6G42914
CC2R	Resistant	m64023e_220409_165810_166659661_ccs	2010	gene						1162	1453	-	CC2R_00001511	PF02419	PsbL protein	sp|Q67H84|PSBL_YUCGL	ALOMY0G47274
CC2R	Resistant	m64023e_220409_165810_166724351_ccs	13510	gene						8449	11139	+	CC2R_00000329	PF04195	Putative gypsy type transposon		ALOMY2G20844
CC2R	Resistant	m64023e_220409_165810_166724868_ccs0	8460	gene						5246	6519	+	CC2R_00000956	PF03101	FAR1 DNA-binding domain	sp|Q9SY66|FRS11_ARATH	ALOMY1G03554	TF
CC2R	Resistant	m64023e_220409_165810_166724868_ccs0	8460	gene						7521	8239	-	CC2R_00000957				ALOMY7G38722
CC2R	Resistant	m64023e_220409_165810_166857407_ccs	11588	gene						214	8609	-	CC2R_00000568	PF00016	Ribulose bisphosphate carboxylase large chain, catalytic domain	sp|A8Y9H8|RBL_LOLPR	ALOMY6G46021
CC2R	Resistant	m64023e_220409_165810_166857407_ccs	11588	gene						2445	7083	+	CC2R_00000569	PF02392	Ycf4	sp|P00828|ATPB_HORVU	ALOMY0G46729
CC2R	Resistant	m64023e_220409_165810_166857407_ccs	11588	gene						7698	8660	+	CC2R_00000570	PF16639	Apocytochrome F, N-terminal	sp|A1EA21|CYF_AGRST	ALOMY0G46730
CC2R	Resistant	m64023e_220409_165810_166857407_ccs	11588	gene						9499	10038	-	CC2R_00000571	PF00283	Cytochrome b559, alpha (gene psbE) and beta (gene psbF)subunits	sp|Q5SD42|PSBF_HUPLU	ALOMY0G47274
CC2R	Resistant	m64023e_220409_165810_167118235_ccs	11340	gene						3500	6737	+	CC2R_00000612	PF04195	Putative gypsy type transposon		ALOMY1G05155
CC2R	Resistant	m64023e_220409_165810_167248970_ccs	7650	gene						969	2080	+	CC2R_00001049				ALOMY3G14830
CC2R	Resistant	m64023e_220409_165810_16780060_ccs	7890	gene						3760	7182	+	CC2R_00001016	PF04195	Putative gypsy type transposon		ALOMY1G05155
CC2R	Resistant	m64023e_220409_165810_167904094_ccs	13097	gene						8909	10607	-	CC2R_00000376	PF00241	Cofilin/tropomyosin-type actin-binding protein	sp|Q6EUH7|ADF1_ORYSJ	ALOMY0G47818
CC2R	Resistant	m64023e_220409_165810_167904094_ccs	13097	gene						11251	13047	-	CC2R_00000377	PF13041	PPR repeat family	sp|Q9FLZ9|PP405_ARATH	ALOMY0G47817
CC2R	Resistant	m64023e_220409_165810_167970499_ccs01	3316	gene						76	525	+	CC2R_00001427				ALOMY1G05206
CC2R	Resistant	m64023e_220409_165810_168166237_ccs	7320	gene						5418	6123	+	CC2R_00001086				ALOMY2G24538
CC2R	Resistant	m64023e_220409_165810_168298041_ccs	7246	gene						5808	7188	+	CC2R_00001092	PF04195	Putative gypsy type transposon		ALOMY2G20844
CC2R	Resistant	m64023e_220409_165810_16845433_ccs	12509	gene						11	1155	-	CC2R_00000445	PF03040	CemA family	sp|A8Y9I1|CEMA_LOLPR	ALOMY0G46730
CC2R	Resistant	m64023e_220409_165810_16845433_ccs	12509	gene						1199	9804	-	CC2R_00000446	PF00016	Ribulose bisphosphate carboxylase large chain, catalytic domain	sp|A8Y9H8|RBL_LOLPR	ALOMY6G46021
CC2R	Resistant	m64023e_220409_165810_16845433_ccs	12509	gene						5851	7345	+	CC2R_00000447	PF00006	ATP synthase alpha/beta family, nucleotide-binding domain	sp|P62614|ATPB_AEGCR	ALOMY0G46729
CC2R	Resistant	m64023e_220409_165810_16845433_ccs	12509	gene						10227	11326	+	CC2R_00000448	PF00329	Respiratory-chain NADH dehydrogenase, 30 Kd subunit	sp|Q95H60|NDHJ_WHEAT	ALOMY3G14315
CC2R	Resistant	m64023e_220409_165810_168952198_ccs	4410	gene						3562	3744	-	CC2R_00001340				ALOMY2G23996
CC2R	Resistant	m64023e_220409_165810_168953176_ccs	11160	gene						2	433	+	CC2R_00000627	PF13237	4Fe-4S dicluster domain	sp|O98692|NDHI_HORVU	ALOMY0G47052
CC2R	Resistant	m64023e_220409_165810_168953176_ccs	11160	gene						695	2220	+	CC2R_00000628	PF00499	NADH-ubiquinone/plastoquinone oxidoreductase chain 6	sp|Q95H44|NU6C_WHEAT	ALOMY0G47051
CC2R	Resistant	m64023e_220409_165810_168953176_ccs	11160	gene						2746	4110	+	CC2R_00000629	PF00361	Proton-conducting membrane transporter	sp|P58420|NU4C_WHEAT	ALOMY0G47050
CC2R	Resistant	m64023e_220409_165810_168953176_ccs	11160	gene						4520	8707	+	CC2R_00000630	PF00361	Proton-conducting membrane transporter	sp|Q32880|NU5C_POAPR	ALOMY0G47048
CC2R	Resistant	m64023e_220409_165810_168953176_ccs	11160	gene						8786	10690	+	CC2R_00000631	PF00146	NADH dehydrogenase	sp|A1EA64|NU1C_AGRST	ALOMY0G47053
CC2R	Resistant	m64023e_220409_165810_169345161_ccs	7080	gene						86	253	+	CC2R_00001112	PF00420	NADH-ubiquinone/plastoquinone oxidoreductase chain 4L	sp|P69379|NU4LC_WHEAT	ALOMY0G47038
CC2R	Resistant	m64023e_220409_165810_169345161_ccs	7080	gene						1255	2619	+	CC2R_00001113	PF00361	Proton-conducting membrane transporter	sp|P58420|NU4C_WHEAT	ALOMY0G47050
CC2R	Resistant	m64023e_220409_165810_169345161_ccs	7080	gene						2768	3337	-	CC2R_00001114	PF01578	Cytochrome C assembly protein	sp|A1EA58|CCSA_AGRST	ALOMY0G47049
CC2R	Resistant	m64023e_220409_165810_169345161_ccs	7080	gene						3350	5361	+	CC2R_00001115	PF00146	NADH dehydrogenase	sp|A1EA64|NU1C_AGRST	ALOMY0G47053
CC2R	Resistant	m64023e_220409_165810_169345161_ccs	7080	gene						5459	6001	+	CC2R_00001116	PF13237	4Fe-4S dicluster domain	sp|A1EA63|NDHI_AGRST	ALOMY0G47052
CC2R	Resistant	m64023e_220409_165810_169345161_ccs	7080	gene						6263	6793	+	CC2R_00001117	PF00499	NADH-ubiquinone/plastoquinone oxidoreductase chain 6	sp|Q95H44|NU6C_WHEAT	ALOMY0G47051
CC2R	Resistant	m64023e_220409_165810_169346358_ccs01	6709	gene						1499	2242	-	CC2R_00001160	PF03083	Sugar efflux transporter for intercellular exchange	sp|A2WSD3|SWT6B_ORYSI	ALOMY2G24225
CC2R	Resistant	m64023e_220409_165810_169347134_ccs	4650	gene						544	1048	-	CC2R_00001318	PF00808	Histone-like transcription factor (CBF/NF-Y) and archaeal histone	sp|Q65XK1|NFYB4_ORYSJ	ALOMY5G33365	TF
CC2R	Resistant	m64023e_220409_165810_169411989_ccs01	8656	gene						676	2840	+	CC2R_00000935				ALOMY7G39957
CC2R	Resistant	m64023e_220409_165810_169412353_ccs	12493	gene						585	3556	+	CC2R_00000449				ALOMY2G20844
CC2R	Resistant	m64023e_220409_165810_169478566_ccs0	2397	gene						617	2026	-	CC2R_00001492	PF18323	Cop9 signalosome subunit 5 C-terminal domain	sp|Q8H936|CSN5_ORYSJ	ALOMY3G10993
CC2R	Resistant	m64023e_220409_165810_169478566_ccs01	2430	gene						163	878	-	CC2R_00001489	PF18323	Cop9 signalosome subunit 5 C-terminal domain	sp|Q8H936|CSN5_ORYSJ	ALOMY3G10993
CC2R	Resistant	m64023e_220409_165810_169478566_ccs01	2430	gene						1221	1504	-	CC2R_00001490	PF18323	Cop9 signalosome subunit 5 C-terminal domain	sp|Q8H936|CSN5_ORYSJ	ALOMY3G10993
CC2R	Resistant	m64023e_220409_165810_170789058_ccs	1910	gene						721	858	-	CC2R_00001516				ALOMY1G06584
CC2R	Resistant	m64023e_220409_165810_170789058_ccs	1910	gene						937	1876	-	CC2R_00001517
CC2R	Resistant	m64023e_220409_165810_171246760_ccs	11850	gene						3319	3504	+	CC2R_00000535				ALOMY4G26342
CC2R	Resistant	m64023e_220409_165810_171246760_ccs	11850	gene						3513	8206	+	CC2R_00000536	PF07714	Protein tyrosine and serine/threonine kinase	sp|O22558|STY8_ARATH	ALOMY4G26342
CC2R	Resistant	m64023e_220409_165810_171311138_ccs	9330	gene						802	3670	-	CC2R_00000871				ALOMY2G20844
CC2R	Resistant	m64023e_220409_165810_171311138_ccs	9330	gene						5416	8898	+	CC2R_00000872				ALOMY5G32141
CC2R	Resistant	m64023e_220409_165810_171312275_ccs	9360	gene						4350	4883	+	CC2R_00000868				ALOMY4G28855
CC2R	Resistant	m64023e_220409_165810_171706014_ccs	15990	gene						7754	10699	+	CC2R_00000176				ALOMY2G20844
CC2R	Resistant	m64023e_220409_165810_171836743_ccs	12960	gene						221	12881	-	CC2R_00000391	PF01578	Cytochrome C assembly protein	sp|A1EA58|CCSA_AGRST	ALOMY0G47049
CC2R	Resistant	m64023e_220409_165810_171836743_ccs	12960	gene						5538	7648	+	CC2R_00000392	PF00146	NADH dehydrogenase	sp|A1EA64|NU1C_AGRST	ALOMY0G47053
CC2R	Resistant	m64023e_220409_165810_171836743_ccs	12960	gene						7746	8288	+	CC2R_00000393	PF13237	4Fe-4S dicluster domain	sp|A1EA63|NDHI_AGRST	ALOMY0G47052
CC2R	Resistant	m64023e_220409_165810_171836743_ccs	12960	gene						8550	10075	+	CC2R_00000394	PF00499	NADH-ubiquinone/plastoquinone oxidoreductase chain 6	sp|Q95H44|NU6C_WHEAT	ALOMY0G47051
CC2R	Resistant	m64023e_220409_165810_171836743_ccs	12960	gene						10600	11925	+	CC2R_00000395	PF00361	Proton-conducting membrane transporter	sp|P58420|NU4C_WHEAT	ALOMY0G47050
CC2R	Resistant	m64023e_220409_165810_171967804_ccs	4260	gene						548	2673	-	CC2R_00001354	PF00010	Helix-loop-helix DNA-binding domain	sp|Q9LTS4|BH041_ARATH	ALOMY3G17460	TF
CC2R	Resistant	m64023e_220409_165810_171968148_ccs	6420	gene						2491	5239	+	CC2R_00001182	PF04195	Putative gypsy type transposon		ALOMY7G39957
CC2R	Resistant	m64023e_220409_165810_171968148_ccs	6420	gene						5296	5658	+	CC2R_00001183				ALOMY7G39957
CC2R	Resistant	m64023e_220409_165810_172230111_ccs	6688	gene						2417	2996	-	CC2R_00001161	PF11594	Mediator complex subunit 28	sp|Q9LFA5|MED28_ARATH	ALOMY5G35612
CC2R	Resistant	m64023e_220409_165810_172296317_ccs	14379	gene						7685	10602	-	CC2R_00000251				ALOMY5G32141
CC2R	Resistant	m64023e_220409_165810_172427168_ccs01	3697	gene						1867	3296	-	CC2R_00001405	PF00957	Synaptobrevin	sp|Q9LFP1|VA713_ARATH	ALOMY1G06862
CC2R	Resistant	m64023e_220409_165810_172622407_ccs01	8850	gene						2101	2565	-	CC2R_00000917				ALOMY4G30457
CC2R	Resistant	m64023e_220409_165810_172689921_ccs	4998	gene						2905	4839	+	CC2R_00001283	PF00067	Cytochrome P450	sp|Q6YV88|C71Z7_ORYSJ	ALOMY3G17694
CC2R	Resistant	m64023e_220409_165810_173082320_ccs	5132	gene						828	2859	-	CC2R_00001274
CC2R	Resistant	m64023e_220409_165810_173082320_ccs	5132	gene						2878	3645	-	CC2R_00001275				ALOMY1G00207
CC2R	Resistant	m64023e_220409_165810_173280022_ccs	5252	gene						1171	2079	-	CC2R_00001269	PF00421	Photosystem II protein	sp|P11095|PSBC_HORVU	ALOMY0G46722
CC2R	Resistant	m64023e_220409_165810_173539969_ccs	6540	gene						3900	6263	+	CC2R_00001168	PF00344	SecY translocase	sp|Q54XK2|SC61A_DICDI	ALOMY7G39624
CC2R	Resistant	m64023e_220409_165810_173933208_ccs	7830	gene						165	6850	+	CC2R_00001025	PF01578	Cytochrome C assembly protein	sp|A1EA58|CCSA_AGRST	ALOMY0G47049
CC2R	Resistant	m64023e_220409_165810_173933208_ccs	7830	gene						1078	2603	-	CC2R_00001026	PF00499	NADH-ubiquinone/plastoquinone oxidoreductase chain 6	sp|Q95H44|NU6C_WHEAT	ALOMY0G47051
CC2R	Resistant	m64023e_220409_165810_173933208_ccs	7830	gene						2865	3407	-	CC2R_00001027	PF13237	4Fe-4S dicluster domain	sp|A1EA63|NDHI_AGRST	ALOMY0G47052
CC2R	Resistant	m64023e_220409_165810_173933208_ccs	7830	gene						3505	6588	-	CC2R_00001028	PF00146	NADH dehydrogenase	sp|A1EA64|NU1C_AGRST	ALOMY6G44543
CC2R	Resistant	m64023e_220409_165810_173933208_ccs	7830	gene						6999	7763	-	CC2R_00001029	PF00361	Proton-conducting membrane transporter	sp|P58420|NU4C_WHEAT	ALOMY0G47050
CC2R	Resistant	m64023e_220409_165810_174328664_ccs	10571	gene						75	1188	-	CC2R_00000715	PF00515	Tetratricopeptide repeat	sp|A8Y9H1|YCF3_LOLPR	ALOMY0G46727
CC2R	Resistant	m64023e_220409_165810_174328664_ccs	10571	gene						1420	9535	+	CC2R_00000716	PF00223	Photosystem I psaA/psaB protein	sp|P58311|PSAA_WHEAT	ALOMY0G46726
CC2R	Resistant	m64023e_220409_165810_174328664_ccs	10571	gene						9561	10143	+	CC2R_00000717	PF00223	Photosystem I psaA/psaB protein	sp|P58386|PSAB_WHEAT	ALOMY0G46725
CC2R	Resistant	m64023e_220409_165810_174457914_ccs	4282	gene						2406	3941	-	CC2R_00001349	PF01824	MatK/TrnK amino terminal region	sp|Q9MUZ4|MATK_PHLPR	ALOMY0G46721
CC2R	Resistant	m64023e_220409_165810_174458649_ccs	5247	gene						3046	3384	+	CC2R_00001272				ALOMY6G44144
CC2R	Resistant	m64023e_220409_165810_174720417_ccs	6450	gene						65	1319	+	CC2R_00001180				ALOMY1G07242
CC2R	Resistant	m64023e_220409_165810_17499235_ccs	14122	gene						11565	14019	+	CC2R_00000281				ALOMY1G05155
CC2R	Resistant	m64023e_220409_165810_17500038_ccs	15270	gene						4288	4515	+	CC2R_00000200				ALOMY3G15415
CC2R	Resistant	m64023e_220409_165810_17500038_ccs	15270	gene						4597	5246	+	CC2R_00000201	PF03478	Protein of unknown function (DUF295)		ALOMY3G15415
CC2R	Resistant	m64023e_220409_165810_175310661_ccs	14844	gene						7320	7921	+	CC2R_00000227	PF07762	Protein of unknown function (DUF1618)		ALOMY4G28625
CC2R	Resistant	m64023e_220409_165810_175310661_ccs	14844	gene						8132	8398	+	CC2R_00000228	PF07762	Protein of unknown function (DUF1618)		ALOMY4G28625
CC2R	Resistant	m64023e_220409_165810_175769692_ccs	6890	gene						3375	6086	+	CC2R_00001137				ALOMY1G05155
CC2R	Resistant	m64023e_220409_165810_176031787_ccs	14279	gene						7563	7844	-	CC2R_00000260				ALOMY7G38237
CC2R	Resistant	m64023e_220409_165810_176031787_ccs	14279	gene						10627	12402	-	CC2R_00000261	PF01485	IBR domain, a half RING-finger domain	sp|Q84RR0|ARI7_ARATH	ALOMY7G41783
CC2R	Resistant	m64023e_220409_165810_17630821_ccs01	9754	gene						923	4723	-	CC2R_00000826				ALOMY7G38722
CC2R	Resistant	m64023e_220409_165810_176554454_ccs	6030	gene						122	2225	-	CC2R_00001204				ALOMY2G20844
CC2R	Resistant	m64023e_220409_165810_176554454_ccs	6030	gene						2666	2884	-	CC2R_00001205	PF04195	Putative gypsy type transposon		ALOMY2G20844
CC2R	Resistant	m64023e_220409_165810_176751630_ccs	6928	gene						1628	2095	+	CC2R_00001132				ALOMY2G20844
CC2R	Resistant	m64023e_220409_165810_176751630_ccs	6928	gene						2099	4757	+	CC2R_00001133	PF04195	Putative gypsy type transposon		ALOMY2G20844
CC2R	Resistant	m64023e_220409_165810_176816470_ccs	4344	gene						2695	3920	+	CC2R_00001347			sp|Q680C0|GDL62_ARATH	ALOMY2G21449
CC2R	Resistant	m64023e_220409_165810_176882249_ccs	5655	gene						3276	5617	+	CC2R_00001235	PF04195	Putative gypsy type transposon		ALOMY1G05155
CC2R	Resistant	m64023e_220409_165810_176950026_ccs	13529	gene						114	2688	+	CC2R_00000325
CC2R	Resistant	m64023e_220409_165810_176950026_ccs	13529	gene						7803	8099	+	CC2R_00000326				ALOMY5G31918
CC2R	Resistant	m64023e_220409_165810_176950026_ccs	13529	gene						8973	10358	+	CC2R_00000327				ALOMY7G38152
CC2R	Resistant	m64023e_220409_165810_17697350_ccs	9856	gene						8297	9547	-	CC2R_00000805			sp|P0DO10|PIKS2_ORYSJ	ALOMY7G37088
CC2R	Resistant	m64023e_220409_165810_177211691_ccs	14381	gene						10523	11080	+	CC2R_00000250				ALOMY6G46420
CC2R	Resistant	m64023e_220409_165810_177275722_ccs	2873	gene						849	1540	-	CC2R_00001454	PF08617	Kinase binding protein CGI-121	sp|Q6C7C9|CG121_YARLI	ALOMY2G25299
CC2R	Resistant	m64023e_220409_165810_177341588_ccs	14396	gene						9944	12001	+	CC2R_00000249				ALOMY2G20844
CC2R	Resistant	m64023e_220409_165810_177406715_ccs	9450	gene						1780	3019	+	CC2R_00000856	PF00891	O-methyltransferase domain	sp|A8QW51|OMT2_SORBI	ALOMY1G06521
CC2R	Resistant	m64023e_220409_165810_177472694_ccs	10842	gene						275	4629	+	CC2R_00000673	PF01193	RNA polymerase Rpb3/Rpb11 dimerisation domain	sp|P92429|RPOA_AEGTA	ALOMY0G46677
CC2R	Resistant	m64023e_220409_165810_177472694_ccs	10842	gene						6868	7518	+	CC2R_00000674	PF00574	Clp protease	sp|P0C314|CLPP_ORYSJ	ALOMY0G46731
CC2R	Resistant	m64023e_220409_165810_177472694_ccs	10842	gene						7720	10839	+	CC2R_00000675	PF00411	Ribosomal protein S11	sp|A1E9V7|RR11_SORBI	ALOMY7G41919
CC2R	Resistant	m64023e_220409_165810_177473156_ccs	16740	gene						1008	1530	-	CC2R_00000146				ALOMY1G06605
CC2R	Resistant	m64023e_220409_165810_177473156_ccs	16740	gene						1626	7450	-	CC2R_00000147	PF04195	Putative gypsy type transposon		ALOMY2G20844
CC2R	Resistant	m64023e_220409_165810_177473156_ccs	16740	gene						7471	7800	-	CC2R_00000148
CC2R	Resistant	m64023e_220409_165810_177539234_ccs	3660	gene						2638	3206	+	CC2R_00001408	PF00421	Photosystem II protein	sp|Q4FFN5|PSBC_RANMC	ALOMY0G46722
CC2R	Resistant	m64023e_220409_165810_177604614_ccs	3120	gene						1445	2046	-	CC2R_00001440	PF18913	Fructose-1-6-bisphosphatase, C-terminal domain	sp|P09195|F16P1_WHEAT	ALOMY6G44551
CC2R	Resistant	m64023e_220409_165810_177604614_ccs	3120	gene						2186	2871	-	CC2R_00001441	PF00316	Fructose-1-6-bisphosphatase, N-terminal domain	sp|O64422|F16P1_ORYSJ	ALOMY6G44551
CC2R	Resistant	m64023e_220409_165810_17761169_ccs	6164	gene						2347	2559	+	CC2R_00001194				ALOMY7G37679
CC2R	Resistant	m64023e_220409_165810_177801157_ccs	10200	gene						291	1508	-	CC2R_00000756	PF00223	Photosystem I psaA/psaB protein	sp|A1EA07|PSAB_AGRST	ALOMY0G46725
CC2R	Resistant	m64023e_220409_165810_177801157_ccs	10200	gene						1537	3848	-	CC2R_00000757	PF00223	Photosystem I psaA/psaB protein	sp|P58311|PSAA_WHEAT	ALOMY0G46726
CC2R	Resistant	m64023e_220409_165810_177801157_ccs	10200	gene						4438	5552	-	CC2R_00000758	PF00515	Tetratricopeptide repeat	sp|A8Y9H1|YCF3_LOLPR	ALOMY0G46727
CC2R	Resistant	m64023e_220409_165810_177801157_ccs	10200	gene						9674	10165	+	CC2R_00000759	PF01479	S4 domain	sp|P69645|RR4_LAMAU	ALOMY0G46728
CC2R	Resistant	m64023e_220409_165810_177866675_ccs	1440	gene						103	917	+	CC2R_00001533				ALOMY1G05665
CC2R	Resistant	m64023e_220409_165810_177866940_ccs	11083	gene						4093	4406	-	CC2R_00000641				ALOMY6G42914
CC2R	Resistant	m64023e_220409_165810_178129242_ccs01	6648	gene						1016	3775	-	CC2R_00001163				ALOMY7G40602
CC2R	Resistant	m64023e_220409_165810_178129242_ccs01	6648	gene						5938	6480	+	CC2R_00001164				ALOMY1G07169
CC2R	Resistant	m64023e_220409_165810_178717232_ccs	2520	gene						385	1059	-	CC2R_00001482	PF01000	RNA polymerase Rpb3/RpoA insert domain	sp|A1EA40|RPOA_AGRST	ALOMY0G46732
CC2R	Resistant	m64023e_220409_165810_178850164_ccs	15299	gene						12661	14347	+	CC2R_00000197	PF00550	Phosphopantetheine attachment site	sp|O80800|ACPM2_ARATH	ALOMY6G43888
CC2R	Resistant	m64023e_220409_165810_179110615_ccs	3905	gene						105	3718	+	CC2R_00001391	PF06507	Auxin response factor	sp|Q6Z2W3|ARFE_ORYSJ	ALOMY4G29754	TF
CC2R	Resistant	m64023e_220409_165810_179309157_ccs	8666	gene						2	1763	-	CC2R_00000934				ALOMY4G30888
CC2R	Resistant	m64023e_220409_165810_179505146_ccs	8250	gene						6152	8236	+	CC2R_00000978	PF13639	Ring finger domain	sp|Q9LM69|ATL80_ARATH	ALOMY7G38840
CC2R	Resistant	m64023e_220409_165810_17958481_ccs	2340	gene						27	1499	-	CC2R_00001496	PF00361	Proton-conducting membrane transporter	sp|P58420|NU4C_WHEAT	ALOMY0G47050
CC2R	Resistant	m64023e_220409_165810_17958481_ccs	2340	gene						1913	2139	-	CC2R_00001497			sp|O03060|NU4C_HORVU	ALOMY0G47050
CC2R	Resistant	m64023e_220409_165810_179701808_ccs01	4351	gene						3225	3635	+	CC2R_00001345	PF13456	Reverse transcriptase-like		ALOMY3G15139
CC2R	Resistant	m64023e_220409_165810_179832234_ccs	15060	gene						2613	3986	-	CC2R_00000209	PF00141	Peroxidase	sp|Q9FJZ9|PER72_ARATH	ALOMY4G28954
CC2R	Resistant	m64023e_220409_165810_179832234_ccs	15060	gene						9349	9624	+	CC2R_00000210
CC2R	Resistant	m64023e_220409_165810_179832234_ccs	15060	gene						9718	10229	+	CC2R_00000211				ALOMY6G45496
CC2R	Resistant	m64023e_220409_165810_179832234_ccs	15060	gene						10240	11658	+	CC2R_00000212				ALOMY6G45496
CC2R	Resistant	m64023e_220409_165810_179896583_ccs0	3840	gene						294	3840	+	CC2R_00001398	PF00834	Ribulose-phosphate 3 epimerase family	sp|Q9ZTP5|RPE_ORYSJ	ALOMY6G45452
CC2R	Resistant	m64023e_220409_165810_179896583_ccs01	3840	gene						1128	3414	+	CC2R_00001397	PF00834	Ribulose-phosphate 3 epimerase family	sp|Q9SAU2|RPE_ARATH	ALOMY6G45452
CC2R	Resistant	m64023e_220409_165810_179897726_ccs	9248	gene						7318	8957	+	CC2R_00000880	PF03083	Sugar efflux transporter for intercellular exchange	sp|Q8W0K2|SWT6B_ORYSJ	ALOMY1G01433
CC2R	Resistant	m64023e_220409_165810_180027920_ccs	3934	gene						609	1308	-	CC2R_00001382			sp|Q6ENR2|YCF73_SACOF	ALOMY0G46682
CC2R	Resistant	m64023e_220409_165810_180027920_ccs	3934	gene						1632	3875	+	CC2R_00001383	PF00361	Proton-conducting membrane transporter	sp|P0CC87|NU2C2_LOLPR	ALOMY4G30249
CC2R	Resistant	m64023e_220409_165810_180094814_ccs	9025	gene						7519	9025	+	CC2R_00000902				ALOMY5G32354
CC2R	Resistant	m64023e_220409_165810_18023427_ccs	15421	gene						11486	13288	+	CC2R_00000193				ALOMY1G02102
CC2R	Resistant	m64023e_220409_165810_18024926_ccs	5001	gene						2	2237	+	CC2R_00001282			sp|Q8L860|TOL9_ARATH	ALOMY4G28504
CC2R	Resistant	m64023e_220409_165810_180291249_ccs	4260	gene						187	2431	+	CC2R_00001355	PF00361	Proton-conducting membrane transporter	sp|P0CC87|NU2C2_LOLPR	ALOMY4G30249
CC2R	Resistant	m64023e_220409_165810_180291249_ccs	4260	gene						2555	3047	+	CC2R_00001356	PF00164	Ribosomal protein S12/S23	sp|A4GYN8|RR12B_POPTR	ALOMY2G21331
CC2R	Resistant	m64023e_220409_165810_180291249_ccs	4260	gene						3659	4129	+	CC2R_00001357	PF00177	Ribosomal protein S7p/S5e	sp|A1E9W9|RR7_SORBI	ALOMY0G47046
CC2R	Resistant	m64023e_220409_165810_180553586_ccs	750	gene						119	451	+	CC2R_00001540				ALOMY5G35303
CC2R	Resistant	m64023e_220409_165810_18284547_ccs01	11021	gene						4442	5755	-	CC2R_00000647	PF13359	DDE superfamily endonuclease	sp|Q94K49|ALP1_ARATH	ALOMY3G11186
CC2R	Resistant	m64023e_220409_165810_18284547_ccs01	11021	gene						9713	9865	-	CC2R_00000648				ALOMY6G45474
CC2R	Resistant	m64023e_220409_165810_18351723_ccs0	7440	gene						3974	4270	+	CC2R_00001072			sp|Q9LST7|PSB3_ORYSJ	ALOMY4G29123
CC2R	Resistant	m64023e_220409_165810_18351723_ccs01	8563	gene						453	1196	+	CC2R_00000940			sp|Q9LST7|PSB3_ORYSJ	ALOMY4G29123
CC2R	Resistant	m64023e_220409_165810_1836082_ccs	11185	gene						1690	5172	+	CC2R_00000626				ALOMY5G32141
CC2R	Resistant	m64023e_220409_165810_18678626_ccs	6018	gene						1396	1803	+	CC2R_00001207				ALOMY2G20844
CC2R	Resistant	m64023e_220409_165810_18678626_ccs	6018	gene						1957	2576	+	CC2R_00001208				ALOMY2G20844
CC2R	Resistant	m64023e_220409_165810_18678626_ccs	6018	gene						2713	3717	+	CC2R_00001209				ALOMY2G20844
CC2R	Resistant	m64023e_220409_165810_18678626_ccs	6018	gene						3753	3935	+	CC2R_00001210				ALOMY2G20844
CC2R	Resistant	m64023e_220409_165810_18875797_ccs	16590	gene						13253	15764	-	CC2R_00000150				ALOMY2G20844
CC2R	Resistant	m64023e_220409_165810_18875797_ccs	16590	gene						15785	16021	-	CC2R_00000151				ALOMY2G20844
CC2R	Resistant	m64023e_220409_165810_18941154_ccs0	3600	gene						1514	2296	+	CC2R_00001412	PF13966	zinc-binding in reverse transcriptase		ALOMY3G10186	TF
CC2R	Resistant	m64023e_220409_165810_1901760_ccs	5400	gene						700	3013	+	CC2R_00001258	PF03647	Transmembrane proteins 14C		ALOMY3G15052
CC2R	Resistant	m64023e_220409_165810_1901760_ccs	5400	gene						3308	5214	-	CC2R_00001259	PF00067	Cytochrome P450	sp|Q50EK1|C16B1_PICSI	ALOMY3G15051
CC2R	Resistant	m64023e_220409_165810_19466425_ccs	10799	gene						1983	3092	+	CC2R_00000680				ALOMY7G37110
CC2R	Resistant	m64023e_220409_165810_19466551_ccs	16410	gene						6762	7010	+	CC2R_00000155				ALOMY6G42914
CC2R	Resistant	m64023e_220409_165810_19530983_ccs	12252	gene						1118	1270	-	CC2R_00000482
CC2R	Resistant	m64023e_220409_165810_19531209_ccs	12961	gene						7152	8497	+	CC2R_00000390	PF00956	Nucleosome assembly protein (NAP)	sp|Q53WK4|NAP1B_ORYSJ	ALOMY1G09243
CC2R	Resistant	m64023e_220409_165810_19662732_ccs	3930	gene						14	136	+	CC2R_00001386			sp|Q7XQN1|MYB80_ORYSJ	ALOMY2G22856
CC2R	Resistant	m64023e_220409_165810_19662732_ccs	3930	gene						2597	3025	+	CC2R_00001387				ALOMY3G16150
CC2R	Resistant	m64023e_220409_165810_20382793_ccs	9669	gene						6384	9616	+	CC2R_00000837	PF04195	Putative gypsy type transposon		ALOMY1G05155
CC2R	Resistant	m64023e_220409_165810_20644244_ccs	9030	gene						6284	8079	+	CC2R_00000899			sp|Q7XA42|RGA1_SOLBU	ALOMY3G17146
CC2R	Resistant	m64023e_220409_165810_20644683_ccs0	7080	gene						2	1669	-	CC2R_00001121	PF09177	Syntaxin 6, N-terminal		ALOMY6G43420
CC2R	Resistant	m64023e_220409_165810_21234978_ccs	13350	gene						1365	2639	+	CC2R_00000345	PF14226	non-haem dioxygenase in morphine synthesis N-terminal	sp|Q40062|IDS3_HORVU	ALOMY4G31012
CC2R	Resistant	m64023e_220409_165810_21430762_ccs	4290	gene						2918	3748	+	CC2R_00001348			sp|Q9LY66|RK1_ARATH	ALOMY5G33881
CC2R	Resistant	m64023e_220409_165810_21431195_ccs	8550	gene						13	1486	+	CC2R_00000942	PF03469	XH domain	sp|Q9S9P3|FDM1_ARATH	ALOMY4G30468
CC2R	Resistant	m64023e_220409_165810_21890668_ccs	4980	gene						4081	4773	-	CC2R_00001286				ALOMY2G23101
CC2R	Resistant	m64023e_220409_165810_21957383_ccs0	3030	gene						2353	2824	-	CC2R_00001447			sp|Q96386|MT3_CARPA	ALOMY2G23166
CC2R	Resistant	m64023e_220409_165810_21957383_ccs01	3030	gene						1573	2073	-	CC2R_00001449	PF01439	Metallothionein	sp|A3B0Y1|MT3B_ORYSJ	ALOMY2G23166
CC2R	Resistant	m64023e_220409_165810_22284461_ccs	9700	gene						5420	5668	+	CC2R_00000836				ALOMY6G42914
CC2R	Resistant	m64023e_220409_165810_2229864_ccs	20580	gene						13596	14228	-	CC2R_00000035				ALOMY4G29304
CC2R	Resistant	m64023e_220409_165810_2230546_ccs	19289	gene						12533	15375	-	CC2R_00000060	PF00069	Protein kinase domain	sp|Q3EDL4|Y1154_ARATH	ALOMY5G34398
CC2R	Resistant	m64023e_220409_165810_22349055_ccs	11638	gene						127	294	+	CC2R_00000553	PF00420	NADH-ubiquinone/plastoquinone oxidoreductase chain 4L	sp|P69379|NU4LC_WHEAT	ALOMY0G47038
CC2R	Resistant	m64023e_220409_165810_22349055_ccs	11638	gene						1296	2222	+	CC2R_00000554	PF00361	Proton-conducting membrane transporter	sp|P58420|NU4C_WHEAT	ALOMY0G47050
CC2R	Resistant	m64023e_220409_165810_22349055_ccs	11638	gene						2308	2664	+	CC2R_00000555			sp|P58420|NU4C_WHEAT	ALOMY0G47050
CC2R	Resistant	m64023e_220409_165810_22349055_ccs	11638	gene						2813	3742	-	CC2R_00000556	PF01578	Cytochrome C assembly protein	sp|A1EA58|CCSA_AGRST	ALOMY0G47049
CC2R	Resistant	m64023e_220409_165810_22349055_ccs	11638	gene						7868	9777	+	CC2R_00000557	PF00146	NADH dehydrogenase	sp|A1EA64|NU1C_AGRST	ALOMY0G47053
CC2R	Resistant	m64023e_220409_165810_22349055_ccs	11638	gene						10080	10622	+	CC2R_00000558	PF13237	4Fe-4S dicluster domain	sp|A1EA63|NDHI_AGRST	ALOMY0G47052
CC2R	Resistant	m64023e_220409_165810_22349055_ccs	11638	gene						10885	11415	+	CC2R_00000559	PF00499	NADH-ubiquinone/plastoquinone oxidoreductase chain 6	sp|Q95H44|NU6C_WHEAT	ALOMY0G47051
CC2R	Resistant	m64023e_220409_165810_22546982_ccs01	2700	gene						816	2536	-	CC2R_00001469				ALOMY1G06152
CC2R	Resistant	m64023e_220409_165810_22937871_ccs	28470	gene						20930	23266	-	CC2R_00000001
CC2R	Resistant	m64023e_220409_165810_22937871_ccs	28470	gene						24503	25536	-	CC2R_00000002			sp|Q10Q26|Y3123_ORYSJ	ALOMY7G39929
CC2R	Resistant	m64023e_220409_165810_23136076_ccs	9030	gene						405	1923	+	CC2R_00000900				ALOMY0G47033
CC2R	Resistant	m64023e_220409_165810_23136076_ccs	9030	gene						4712	7477	+	CC2R_00000901				ALOMY1G05155
CC2R	Resistant	m64023e_220409_165810_23136846_ccs	12270	gene						10901	11716	-	CC2R_00000481				ALOMY4G29304
CC2R	Resistant	m64023e_220409_165810_23396859_ccs0	10500	gene						8957	9733	-	CC2R_00000728	PF04005	Hus1-like protein		ALOMY3G12652
CC2R	Resistant	m64023e_220409_165810_23396859_ccs01	7149	gene						3568	4647	-	CC2R_00001104	PF04005	Hus1-like protein		ALOMY3G12652
CC2R	Resistant	m64023e_220409_165810_23529484_ccs	4230	gene						3562	4137	+	CC2R_00001359	PF00067	Cytochrome P450	sp|O48958|C71E1_SORBI	ALOMY1G09713
CC2R	Resistant	m64023e_220409_165810_23659147_ccs	9660	gene						4493	8970	-	CC2R_00000838	PF00067	Cytochrome P450	sp|Q43135|C79A1_SORBI	ALOMY2G17787
CC2R	Resistant	m64023e_220409_165810_24183077_ccs	6030	gene						4654	5372	+	CC2R_00001202				ALOMY0G47851
CC2R	Resistant	m64023e_220409_165810_2427726_ccs	12088	gene						1183	4369	+	CC2R_00000517	PF04195	Putative gypsy type transposon		ALOMY1G05155
CC2R	Resistant	m64023e_220409_165810_24379747_ccs	5323	gene						1344	2163	+	CC2R_00001264				ALOMY7G39957
CC2R	Resistant	m64023e_220409_165810_24379747_ccs	5323	gene						3741	5242	+	CC2R_00001265	PF04195	Putative gypsy type transposon		ALOMY1G05155
CC2R	Resistant	m64023e_220409_165810_24446628_ccs	10425	gene						555	2081	+	CC2R_00000734	PF00499	NADH-ubiquinone/plastoquinone oxidoreductase chain 6	sp|Q95H44|NU6C_WHEAT	ALOMY0G47051
CC2R	Resistant	m64023e_220409_165810_24446628_ccs	10425	gene						2606	3970	+	CC2R_00000735	PF00361	Proton-conducting membrane transporter	sp|P58420|NU4C_WHEAT	ALOMY0G47050
CC2R	Resistant	m64023e_220409_165810_24446628_ccs	10425	gene						4119	5048	-	CC2R_00000736	PF01578	Cytochrome C assembly protein	sp|A1EA58|CCSA_AGRST	ALOMY0G47049
CC2R	Resistant	m64023e_220409_165810_24446628_ccs	10425	gene						7077	10079	+	CC2R_00000737	PF00146	NADH dehydrogenase	sp|A8Y9D4|NU5C_LOLPR	ALOMY0G47048
CC2R	Resistant	m64023e_220409_165810_24446628_ccs	10425	gene						10177	10425	+	CC2R_00000738	PF00037	4Fe-4S binding domain	sp|P05312|NDHI_WHEAT	ALOMY0G47052
CC2R	Resistant	m64023e_220409_165810_24577247_ccs	8250	gene						7434	7993	-	CC2R_00000977				ALOMY0G48067
CC2R	Resistant	m64023e_220409_165810_24775173_ccs	8970	gene						2825	3078	+	CC2R_00000909				ALOMY6G42914
CC2R	Resistant	m64023e_220409_165810_24839618_ccs	6210	gene						314	625	-	CC2R_00001192				ALOMY4G29449
CC2R	Resistant	m64023e_220409_165810_24840667_ccs	8475	gene						2060	4176	-	CC2R_00000952				ALOMY2G20120
CC2R	Resistant	m64023e_220409_165810_24840667_ccs	8475	gene						4569	5370	-	CC2R_00000953				ALOMY3G14985
CC2R	Resistant	m64023e_220409_165810_24840667_ccs	8475	gene						7296	7673	-	CC2R_00000954				ALOMY3G14983
CC2R	Resistant	m64023e_220409_165810_24904723_ccs	15938	gene						1791	5984	-	CC2R_00000177				ALOMY0G46888
CC2R	Resistant	m64023e_220409_165810_2492345_ccs	17864	gene						5317	7748	-	CC2R_00000093				ALOMY7G39957
CC2R	Resistant	m64023e_220409_165810_2492345_ccs	17864	gene						7802	8717	-	CC2R_00000094	PF04195	Putative gypsy type transposon		ALOMY1G05155
CC2R	Resistant	m64023e_220409_165810_2557257_ccs	7877	gene						6742	7870	-	CC2R_00001021				ALOMY1G06605
CC2R	Resistant	m64023e_220409_165810_25823639_ccs	9900	gene						698	946	-	CC2R_00000799				ALOMY6G42914
CC2R	Resistant	m64023e_220409_165810_25824025_ccs	3902	gene						216	533	+	CC2R_00001392				ALOMY1G10043
CC2R	Resistant	m64023e_220409_165810_26151135_ccs	5850	gene						2670	3011	-	CC2R_00001221				ALOMY2G19551
CC2R	Resistant	m64023e_220409_165810_26217262_ccs	2160	gene						20	571	-	CC2R_00001507	PF02681	Divergent PAP2 family	sp|O32107|YUID_BACSU	ALOMY5G32507
CC2R	Resistant	m64023e_220409_165810_26411599_ccs	7230	gene						1413	2228	-	CC2R_00001098				ALOMY4G29304
CC2R	Resistant	m64023e_220409_165810_26478846_ccs	4110	gene						3597	4078	-	CC2R_00001373				ALOMY2G22418
CC2R	Resistant	m64023e_220409_165810_26479326_ccs	11580	gene						7943	10072	+	CC2R_00000574				ALOMY5G31919
CC2R	Resistant	m64023e_220409_165810_27198142_ccs	9736	gene						7320	9736	-	CC2R_00000828				ALOMY2G20844
CC2R	Resistant	m64023e_220409_165810_27788668_ccs	7883	gene						4755	7727	+	CC2R_00001020				ALOMY1G05155
CC2R	Resistant	m64023e_220409_165810_27789787_ccs	10500	gene						5450	10045	-	CC2R_00000727				ALOMY5G31919
CC2R	Resistant	m64023e_220409_165810_28052121_ccs	19560	gene						7053	10082	-	CC2R_00000054				ALOMY2G20844
CC2R	Resistant	m64023e_220409_165810_28442820_ccs	12527	gene						8997	9245	+	CC2R_00000444				ALOMY6G42914
CC2R	Resistant	m64023e_220409_165810_28770690_ccs	8302	gene						6251	6457	+	CC2R_00000971
CC2R	Resistant	m64023e_220409_165810_28771913_ccs	12127	gene						10192	10584	-	CC2R_00000503				ALOMY3G12504
CC2R	Resistant	m64023e_220409_165810_28772275_ccs	9435	gene						780	860	-	CC2R_00000858
CC2R	Resistant	m64023e_220409_165810_29165840_ccs	8153	gene						1	1610	-	CC2R_00000987	PF00318	Ribosomal protein S2	sp|A1EA01|RR2_AGRST	ALOMY0G46723
CC2R	Resistant	m64023e_220409_165810_29165840_ccs	8153	gene						4141	7868	+	CC2R_00000988	PF00076	RNA recognition motif. (a.k.a. RRM, RBD, or RNP domain)	sp|Q93062|RBPMS_HUMAN	ALOMY1G06688
CC2R	Resistant	m64023e_220409_165810_29491351_ccs	7680	gene						6800	7615	-	CC2R_00001044				ALOMY4G29304
CC2R	Resistant	m64023e_220409_165810_29492767_ccs	12349	gene						1530	3665	-	CC2R_00000461				ALOMY5G31919
CC2R	Resistant	m64023e_220409_165810_29819417_ccs	11646	gene						2195	4192	+	CC2R_00000550	PF13968	Domain of unknown function (DUF4220)		ALOMY4G25701
CC2R	Resistant	m64023e_220409_165810_29819494_ccs	7260	gene						3788	4240	+	CC2R_00001090	PF13456	Reverse transcriptase-like		ALOMY3G15987
CC2R	Resistant	m64023e_220409_165810_29821334_ccs	2160	gene						415	740	+	CC2R_00001508	PF00361	Proton-conducting membrane transporter	sp|P0CD51|NU2C2_SORBI	ALOMY6G44070
CC2R	Resistant	m64023e_220409_165810_29821334_ccs	2160	gene						761	2124	+	CC2R_00001509	PF00361	Proton-conducting membrane transporter	sp|P0CD03|NU2C2_NUPAD	ALOMY6G44069
CC2R	Resistant	m64023e_220409_165810_30016040_ccs	11310	gene						6878	7126	+	CC2R_00000613				ALOMY6G42914
CC2R	Resistant	m64023e_220409_165810_3014769_ccs	2910	gene						286	1018	-	CC2R_00001453				ALOMY5G33224
CC2R	Resistant	m64023e_220409_165810_30343779_ccs	15330	gene						14141	14716	-	CC2R_00000196				ALOMY4G29304
CC2R	Resistant	m64023e_220409_165810_30476719_ccs	12084	gene						80	10759	-	CC2R_00000518	PF00562	RNA polymerase Rpb2, domain 6	sp|A1E9Z8|RPOB_AGRST	ALOMY3G16310
CC2R	Resistant	m64023e_220409_165810_30607886_ccs	17910	gene						13519	16745	-	CC2R_00000091	PF04195	Putative gypsy type transposon		ALOMY5G32354
CC2R	Resistant	m64023e_220409_165810_30869064_ccs	10151	gene						6592	8348	-	CC2R_00000764				ALOMY1G06268
CC2R	Resistant	m64023e_220409_165810_30869064_ccs	10151	gene						9421	10102	+	CC2R_00000765	PF03018	Dirigent-like protein	sp|I1JNN8|DIR_SOYBN	ALOMY2G17722
CC2R	Resistant	m64023e_220409_165810_31263552_ccs	15429	gene						9115	10403	+	CC2R_00000191				ALOMY5G33099
CC2R	Resistant	m64023e_220409_165810_31263552_ccs	15429	gene						13716	14520	+	CC2R_00000192				ALOMY0G46656
CC2R	Resistant	m64023e_220409_165810_31327935_ccs	15841	gene						1591	1845	-	CC2R_00000178				ALOMY1G01559
CC2R	Resistant	m64023e_220409_165810_31327935_ccs	15841	gene						13156	13464	-	CC2R_00000179
CC2R	Resistant	m64023e_220409_165810_31786676_ccs	11010	gene						5612	9092	+	CC2R_00000650	PF04195	Putative gypsy type transposon		ALOMY1G05155
CC2R	Resistant	m64023e_220409_165810_31851785_ccs	5597	gene						26	5596	-	CC2R_00001237	PF16639	Apocytochrome F, N-terminal	sp|A1EA21|CYF_AGRST	ALOMY0G46730
CC2R	Resistant	m64023e_220409_165810_31983343_ccs	11891	gene						10810	11449	+	CC2R_00000533				ALOMY5G32226
CC2R	Resistant	m64023e_220409_165810_31983544_ccs	7766	gene						5555	6354	+	CC2R_00001033				ALOMY3G16138
CC2R	Resistant	m64023e_220409_165810_31983635_ccs0	12240	gene						980	4171	-	CC2R_00000485				ALOMY1G05155
CC2R	Resistant	m64023e_220409_165810_32113404_ccs	8271	gene						3950	7149	-	CC2R_00000976	PF04195	Putative gypsy type transposon		ALOMY1G05155
CC2R	Resistant	m64023e_220409_165810_3213526_ccs	9628	gene						2625	5760	-	CC2R_00000842	PF04195	Putative gypsy type transposon		ALOMY2G20844
CC2R	Resistant	m64023e_220409_165810_3213526_ccs	9628	gene						6852	8561	-	CC2R_00000843				ALOMY2G20844
CC2R	Resistant	m64023e_220409_165810_3213526_ccs	9628	gene						8591	8815	-	CC2R_00000844				ALOMY2G20844
CC2R	Resistant	m64023e_220409_165810_3213526_ccs	9628	gene						8821	9145	-	CC2R_00000845				ALOMY2G20844
CC2R	Resistant	m64023e_220409_165810_32442854_ccs	10410	gene						5964	6779	-	CC2R_00000739				ALOMY4G29304
CC2R	Resistant	m64023e_220409_165810_32573774_ccs	9780	gene						7348	7757	-	CC2R_00000817				ALOMY6G42478
CC2R	Resistant	m64023e_220409_165810_32769936_ccs	16170	gene						8263	11458	+	CC2R_00000165				ALOMY1G05155
CC2R	Resistant	m64023e_220409_165810_33163553_ccs	6570	gene						6254	6379	+	CC2R_00001167				ALOMY3G12006
CC2R	Resistant	m64023e_220409_165810_33229359_ccs01	4430	gene						484	1093	-	CC2R_00001337				ALOMY4G28313
CC2R	Resistant	m64023e_220409_165810_33229359_ccs01	4430	gene						2465	4079	-	CC2R_00001338			sp|P49608|ACOC_CUCMA	ALOMY2G22971
CC2R	Resistant	m64023e_220409_165810_33688363_ccs	9267	gene						460	1441	-	CC2R_00000878				ALOMY1G07018
CC2R	Resistant	m64023e_220409_165810_33884649_ccs	17640	gene						179	5328	+	CC2R_00000104	PF00183	Hsp90 protein	sp|F4JFN3|HS906_ARATH	ALOMY7G38442
CC2R	Resistant	m64023e_220409_165810_33948490_ccs	1950	gene						864	1885	-	CC2R_00001514	PF03080	Neprosin		ALOMY1G05994
CC2R	Resistant	m64023e_220409_165810_34342672_ccs	5280	gene						2006	2176	-	CC2R_00001268				ALOMY2G21760
CC2R	Resistant	m64023e_220409_165810_34407995_ccs	17760	gene						1862	8720	-	CC2R_00000096				ALOMY6G42914
CC2R	Resistant	m64023e_220409_165810_34669240_ccs	15034	gene						7616	8899	-	CC2R_00000214	PF00079	Serpin (serine protease inhibitor)	sp|Q53P09|SPZ8_ORYSJ	ALOMY7G38119
CC2R	Resistant	m64023e_220409_165810_34800740_ccs	10072	gene						2128	3278	+	CC2R_00000780				ALOMY6G42914
CC2R	Resistant	m64023e_220409_165810_35062251_ccs	9570	gene						2717	5448	-	CC2R_00000847				ALOMY7G39957
CC2R	Resistant	m64023e_220409_165810_35259757_ccs	7425	gene						148	1233	+	CC2R_00001073	PF00223	Photosystem I psaA/psaB protein	sp|A1E9J1|PSAA_HORVU	ALOMY0G46726
CC2R	Resistant	m64023e_220409_165810_35259757_ccs	7425	gene						1275	2462	+	CC2R_00001074	PF00223	Photosystem I psaA/psaB protein	sp|P58311|PSAA_WHEAT	ALOMY0G46726
CC2R	Resistant	m64023e_220409_165810_35259757_ccs	7425	gene						2488	3039	+	CC2R_00001075	PF00223	Photosystem I psaA/psaB protein	sp|P58386|PSAB_WHEAT	ALOMY0G46725
CC2R	Resistant	m64023e_220409_165810_35259757_ccs	7425	gene						3884	4084	-	CC2R_00001076			sp|P58257|YCF3_WHEAT	ALOMY0G46727
CC2R	Resistant	m64023e_220409_165810_35259757_ccs	7425	gene						4857	5228	+	CC2R_00001077	PF00329	Respiratory-chain NADH dehydrogenase, 30 Kd subunit	sp|Q95H60|NDHJ_WHEAT	ALOMY3G14315
CC2R	Resistant	m64023e_220409_165810_35324169_ccs	10974	gene						3654	4489	+	CC2R_00000654	PF04195	Putative gypsy type transposon		ALOMY2G20844
CC2R	Resistant	m64023e_220409_165810_35324169_ccs	10974	gene						4508	5105	+	CC2R_00000655				ALOMY2G20844
CC2R	Resistant	m64023e_220409_165810_35324169_ccs	10974	gene						8201	10322	+	CC2R_00000656				ALOMY2G20844
CC2R	Resistant	m64023e_220409_165810_35849189_ccs	17700	gene						8198	17136	-	CC2R_00000098	PF04195	Putative gypsy type transposon		ALOMY2G20844
CC2R	Resistant	m64023e_220409_165810_35850242_ccs0	11820	gene						6314	9961	-	CC2R_00000537	PF13968	Domain of unknown function (DUF4220)		ALOMY1G02089
CC2R	Resistant	m64023e_220409_165810_36309166_ccs	2850	gene						145	1644	+	CC2R_00001455	PF01237	Oxysterol-binding protein	sp|Q940Y1|ORP2A_ARATH	ALOMY5G34288
CC2R	Resistant	m64023e_220409_165810_36505755_ccs	12889	gene						5344	5941	+	CC2R_00000408				ALOMY3G16782
CC2R	Resistant	m64023e_220409_165810_36570186_ccs	5910	gene						3134	3256	-	CC2R_00001216
CC2R	Resistant	m64023e_220409_165810_36897292_ccs	3502	gene						2234	3328	-	CC2R_00001416				ALOMY6G45821
CC2R	Resistant	m64023e_220409_165810_37029497_ccs	13680	gene						2300	4278	-	CC2R_00000309				ALOMY2G20844
CC2R	Resistant	m64023e_220409_165810_37029497_ccs	13680	gene						4464	4943	-	CC2R_00000310	PF04195	Putative gypsy type transposon		ALOMY2G20844
CC2R	Resistant	m64023e_220409_165810_37029497_ccs	13680	gene						5052	5402	-	CC2R_00000311
CC2R	Resistant	m64023e_220409_165810_37619656_ccs	13860	gene						3380	3639	-	CC2R_00000295				ALOMY5G35934
CC2R	Resistant	m64023e_220409_165810_37619723_ccs	12750	gene						2315	5482	-	CC2R_00000415				ALOMY5G32141
CC2R	Resistant	m64023e_220409_165810_37685276_ccs	14996	gene						6816	7075	+	CC2R_00000215				ALOMY1G05155
CC2R	Resistant	m64023e_220409_165810_37685276_ccs	14996	gene						7125	10081	+	CC2R_00000216				ALOMY1G05155
CC2R	Resistant	m64023e_220409_165810_37685689_ccs	16770	gene						11611	15766	-	CC2R_00000142				ALOMY5G32141
CC2R	Resistant	m64023e_220409_165810_37751321_ccs	15090	gene						216	686	-	CC2R_00000206				ALOMY5G31919
CC2R	Resistant	m64023e_220409_165810_37880321_ccs	18600	gene						54	1752	-	CC2R_00000072				ALOMY7G39957
CC2R	Resistant	m64023e_220409_165810_37880321_ccs	18600	gene						10845	11060	-	CC2R_00000073				ALOMY3G17288
CC2R	Resistant	m64023e_220409_165810_3802639_ccs0	8970	gene						165	3467	-	CC2R_00000906				ALOMY5G32141
CC2R	Resistant	m64023e_220409_165810_38404714_ccs	4920	gene						179	1357	+	CC2R_00001293	PF00189	Ribosomal protein S3, C-terminal domain	sp|Q95H48|RK22_WHEAT	ALOMY0G46680
CC2R	Resistant	m64023e_220409_165810_38404714_ccs	4920	gene						2553	3317	+	CC2R_00001294	PF00181	Ribosomal Proteins L2, RNA binding domain	sp|A8Y9C8|RK2_LOLPR	ALOMY0G47044
CC2R	Resistant	m64023e_220409_165810_38404714_ccs	4920	gene						4244	4793	+	CC2R_00001295	PF03947	Ribosomal Proteins L2, C-terminal domain	sp|P11534|RK2_WHEAT	ALOMY2G21925
CC2R	Resistant	m64023e_220409_165810_38537962_ccs	8010	gene						1836	5020	+	CC2R_00001000	PF04195	Putative gypsy type transposon		ALOMY1G05155
CC2R	Resistant	m64023e_220409_165810_38668647_ccs	14895	gene						644	943	+	CC2R_00000218				ALOMY2G20844
CC2R	Resistant	m64023e_220409_165810_38668647_ccs	14895	gene						1001	3737	+	CC2R_00000219	PF04195	Putative gypsy type transposon		ALOMY2G20844
CC2R	Resistant	m64023e_220409_165810_38798059_ccs	2760	gene						1	771	+	CC2R_00001462	PF00361	Proton-conducting membrane transporter	sp|P0CD17|NU2C2_ORYNI	ALOMY6G44069
CC2R	Resistant	m64023e_220409_165810_38798059_ccs	2760	gene						867	2110	+	CC2R_00001463	PF00361	Proton-conducting membrane transporter	sp|P0CC87|NU2C2_LOLPR	ALOMY0G46717
CC2R	Resistant	m64023e_220409_165810_39324070_ccs	7620	gene						1774	2027	-	CC2R_00001057				ALOMY6G42914
CC2R	Resistant	m64023e_220409_165810_3933791_ccs	4080	gene						2847	3182	+	CC2R_00001375				ALOMY1G03437
CC2R	Resistant	m64023e_220409_165810_394186_ccs	6870	gene						55	1381	+	CC2R_00001138	PF00119	ATP synthase A chain	sp|A1EA02|ATPI_AGRST	ALOMY0G46723
CC2R	Resistant	m64023e_220409_165810_394186_ccs	6870	gene						3900	4271	+	CC2R_00001139			sp|P0C2Z6|ATPA_ORYSJ	ALOMY0G46724
CC2R	Resistant	m64023e_220409_165810_394186_ccs	6870	gene						6338	6830	-	CC2R_00001140	PF00223	Photosystem I psaA/psaB protein	sp|Q09G47|PSAB_PLAOC	ALOMY3G13830
CC2R	Resistant	m64023e_220409_165810_395228_ccs	4530	gene						2486	3674	-	CC2R_00001329				ALOMY7G40169
CC2R	Resistant	m64023e_220409_165810_39586143_ccs	9720	gene						2200	2451	+	CC2R_00000829				ALOMY6G42914
CC2R	Resistant	m64023e_220409_165810_39782754_ccs	15180	gene						978	2761	+	CC2R_00000202			sp|Q2R435|LAZY1_ORYSJ	ALOMY6G45400
CC2R	Resistant	m64023e_220409_165810_39782754_ccs	15180	gene						2839	4918	+	CC2R_00000203			sp|Q2R435|LAZY1_ORYSJ	ALOMY6G45400
CC2R	Resistant	m64023e_220409_165810_40044399_ccs	5970	gene						3397	4358	+	CC2R_00001213	PF00411	Ribosomal protein S11	sp|P19951|RS142_MAIZE	ALOMY0G48784
CC2R	Resistant	m64023e_220409_165810_40372991_ccs	11580	gene						1196	2213	-	CC2R_00000575				ALOMY7G40012
CC2R	Resistant	m64023e_220409_165810_40436260_ccs	11430	gene						2067	2616	-	CC2R_00000584
CC2R	Resistant	m64023e_220409_165810_40436260_ccs	11430	gene						2634	4561	-	CC2R_00000585
CC2R	Resistant	m64023e_220409_165810_40568312_ccs	2391	gene						1845	2336	-	CC2R_00001493				ALOMY4G28529
CC2R	Resistant	m64023e_220409_165810_40569628_ccs	10140	gene						2276	2773	-	CC2R_00000767				ALOMY1G06476
CC2R	Resistant	m64023e_220409_165810_40569628_ccs	10140	gene						3371	4326	+	CC2R_00000768				ALOMY2G19067
CC2R	Resistant	m64023e_220409_165810_40698746_ccs	11700	gene						10113	10955	-	CC2R_00000545				ALOMY4G29304
CC2R	Resistant	m64023e_220409_165810_40830059_ccs	5755	gene						3582	3898	-	CC2R_00001229				ALOMY6G42914
CC2R	Resistant	m64023e_220409_165810_40962353_ccs	10153	gene						7719	8306	-	CC2R_00000762				ALOMY4G28313
CC2R	Resistant	m64023e_220409_165810_40962353_ccs	10153	gene						8815	9311	-	CC2R_00000763				ALOMY1G06475
CC2R	Resistant	m64023e_220409_165810_4194979_ccs	18240	gene						593	1433	-	CC2R_00000076
CC2R	Resistant	m64023e_220409_165810_4194979_ccs	18240	gene						1464	3097	-	CC2R_00000077	PF10536	Plant mobile domain		ALOMY0G49003
CC2R	Resistant	m64023e_220409_165810_42272138_ccs	10650	gene						2566	5864	+	CC2R_00000696				ALOMY0G49008
CC2R	Resistant	m64023e_220409_165810_42272138_ccs	10650	gene						6819	7978	-	CC2R_00000697				ALOMY2G19789
CC2R	Resistant	m64023e_220409_165810_42272138_ccs	10650	gene						9507	10649	-	CC2R_00000698	PF03478	Protein of unknown function (DUF295)		ALOMY2G19581		CC2
CC2R	Resistant	m64023e_220409_165810_43321919_ccs	11040	gene						3977	7088	-	CC2R_00000646	PF00676	Dehydrogenase E1 component	sp|Q7XTJ3|ODPA3_ORYSJ	ALOMY2G21290
CC2R	Resistant	m64023e_220409_165810_43386387_ccs	2280	gene						79	1298	-	CC2R_00001498	PF00361	Proton-conducting membrane transporter	sp|P58420|NU4C_WHEAT	ALOMY0G47050
CC2R	Resistant	m64023e_220409_165810_43386387_ccs	2280	gene						1409	2173	+	CC2R_00001499	PF01578	Cytochrome C assembly protein	sp|A1EA58|CCSA_AGRST	ALOMY0G47049
CC2R	Resistant	m64023e_220409_165810_43387095_ccs	8206	gene						10	1914	-	CC2R_00000982				ALOMY7G37860
CC2R	Resistant	m64023e_220409_165810_43387095_ccs	8206	gene						2178	3750	-	CC2R_00000983				ALOMY6G45160
CC2R	Resistant	m64023e_220409_165810_43450566_ccs	11407	gene						852	3977	+	CC2R_00000586				ALOMY2G20844
CC2R	Resistant	m64023e_220409_165810_43451133_ccs	7979	gene						3878	7342	-	CC2R_00001010	PF00118	TCP-1/cpn60 chaperonin family	sp|P08927|RUBB_PEA	ALOMY1G06257
CC2R	Resistant	m64023e_220409_165810_43517645_ccs0	1770	gene						36	191	-	CC2R_00001522				ALOMY6G42914
CC2R	Resistant	m64023e_220409_165810_43843712_ccs0	810	gene						2	280	+	CC2R_00001538	PF00101	Ribulose bisphosphate carboxylase, small chain	sp|P07398|RBS3_WHEAT	ALOMY3G17334
CC2R	Resistant	m64023e_220409_165810_43843712_ccs0	810	gene						446	808	+	CC2R_00001539	PF12338	Ribulose-1,5-bisphosphate carboxylase small subunit	sp|P00871|RBS1_WHEAT	ALOMY3G17336
CC2R	Resistant	m64023e_220409_165810_4393453_ccs	8516	gene						3371	5359	-	CC2R_00000946	PF08241	Methyltransferase domain	sp|Q6ZIK0|GTOMC_ORYSJ	ALOMY4G27574
CC2R	Resistant	m64023e_220409_165810_44302654_ccs	16260	gene						12570	15670	-	CC2R_00000161				ALOMY2G20844
CC2R	Resistant	m64023e_220409_165810_44369555_ccs	10117	gene						7277	9709	-	CC2R_00000773	PF01453	D-mannose binding lectin	sp|Q9ZVA2|EP1L2_ARATH	ALOMY4G25355
CC2R	Resistant	m64023e_220409_165810_44566006_ccs	8814	gene						6431	6517	-	CC2R_00000920
CC2R	Resistant	m64023e_220409_165810_4457116_ccs	11100	gene						190	3269	+	CC2R_00000640	PF00179	Ubiquitin-conjugating enzyme	sp|P25866|UBC2_WHEAT	ALOMY2G23334
CC2R	Resistant	m64023e_220409_165810_44827086_ccs0	4230	gene						967	3950	-	CC2R_00001360	PF00146	NADH dehydrogenase	sp|A1EA64|NU1C_AGRST	ALOMY0G47053
CC2R	Resistant	m64023e_220409_165810_44827086_ccs01	4200	gene						462	1025	-	CC2R_00001365	PF00146	NADH dehydrogenase	sp|A1EA64|NU1C_AGRST	ALOMY0G47053
CC2R	Resistant	m64023e_220409_165810_44827086_ccs01	4200	gene						1656	2186	-	CC2R_00001366	PF00499	NADH-ubiquinone/plastoquinone oxidoreductase chain 6	sp|Q95H44|NU6C_WHEAT	ALOMY0G47051
CC2R	Resistant	m64023e_220409_165810_44827086_ccs01	4200	gene						2451	3615	-	CC2R_00001367	PF00146	NADH dehydrogenase	sp|A1EA64|NU1C_AGRST	ALOMY6G44543
CC2R	Resistant	m64023e_220409_165810_44893936_ccs	9330	gene						4245	4633	-	CC2R_00000874				ALOMY6G42914
CC2R	Resistant	m64023e_220409_165810_45025389_ccs	7133	gene						471	5471	-	CC2R_00001107	PF00501	AMP-binding enzyme	sp|F4K1G2|AEE19_ARATH	ALOMY1G06241
CC2R	Resistant	m64023e_220409_165810_45025389_ccs	7133	gene						6376	7131	-	CC2R_00001108	PF00393	6-phosphogluconate dehydrogenase, C-terminal domain	sp|Q9LI00|6PGD1_ORYSJ	ALOMY1G06242
CC2R	Resistant	m64023e_220409_165810_45089912_ccs	7860	gene						48	5092	+	CC2R_00001022				ALOMY5G32832
CC2R	Resistant	m64023e_220409_165810_45089912_ccs	7860	gene						6182	7086	-	CC2R_00001023				ALOMY3G15381
CC2R	Resistant	m64023e_220409_165810_45418347_ccs0	18150	gene						7564	9412	-	CC2R_00000081				ALOMY5G32141
CC2R	Resistant	m64023e_220409_165810_45746096_ccs0	8880	gene						813	1672	+	CC2R_00000915				ALOMY5G32141
CC2R	Resistant	m64023e_220409_165810_45746096_ccs0	8880	gene						1906	3229	+	CC2R_00000916				ALOMY5G32141
CC2R	Resistant	m64023e_220409_165810_45746382_ccs	2740	gene						17	253	+	CC2R_00001467	PF00164	Ribosomal protein S12/S23	sp|A1E9Q2|RR12_SORBI	ALOMY2G21331
CC2R	Resistant	m64023e_220409_165810_45746382_ccs	2740	gene						865	2262	+	CC2R_00001468	PF00177	Ribosomal protein S7p/S5e	sp|P0CC87|NU2C2_LOLPR	ALOMY6G44070
CC2R	Resistant	m64023e_220409_165810_460476_ccs	5525	gene						1544	4500	+	CC2R_00001245	PF04195	Putative gypsy type transposon		ALOMY2G20844
CC2R	Resistant	m64023e_220409_165810_46071877_ccs	10920	gene						21	5332	-	CC2R_00000664	PF02364	1,3-beta-glucan synthase component	sp|Q9AUE0|CALS1_ARATH	ALOMY1G08009
CC2R	Resistant	m64023e_220409_165810_46071877_ccs	10920	gene						6743	7043	+	CC2R_00000665	PF14288	1,3-beta-glucan synthase subunit FKS1, domain-1	sp|Q9LXT9|CALS3_ARATH	ALOMY1G08009
CC2R	Resistant	m64023e_220409_165810_46071877_ccs	10920	gene						7172	10792	+	CC2R_00000666			sp|Q9LXT9|CALS3_ARATH	ALOMY1G08009
CC2R	Resistant	m64023e_220409_165810_46072651_ccs	5370	gene						20	337	-	CC2R_00001260	PF12796	Ankyrin repeats (3 copies)	sp|Q6AWW5|Y5262_ARATH	ALOMY7G41596
CC2R	Resistant	m64023e_220409_165810_46072651_ccs	5370	gene						2221	2544	-	CC2R_00001261				ALOMY3G12596
CC2R	Resistant	m64023e_220409_165810_46139086_ccs01	5054	gene						2687	3046	-	CC2R_00001277				ALOMY5G31918
CC2R	Resistant	m64023e_220409_165810_46465220_ccs	13650	gene						10359	13004	+	CC2R_00000314	PF00085	Thioredoxin	sp|Q5WA72|PDI15_ORYSJ	ALOMY1G06767
CC2R	Resistant	m64023e_220409_165810_46728248_ccs	9420	gene						36	4227	+	CC2R_00000859	PF00223	Photosystem I psaA/psaB protein	sp|A1EA07|PSAB_AGRST	ALOMY0G46725
CC2R	Resistant	m64023e_220409_165810_46728248_ccs	9420	gene						5151	6265	+	CC2R_00000860	PF00515	Tetratricopeptide repeat	sp|A8Y9H1|YCF3_LOLPR	ALOMY0G46727
CC2R	Resistant	m64023e_220409_165810_46728248_ccs	9420	gene						6292	9170	+	CC2R_00000861	PF00223	Photosystem I psaA/psaB protein	sp|P58311|PSAA_WHEAT	ALOMY0G46726
CC2R	Resistant	m64023e_220409_165810_46794182_ccs	10440	gene						5365	9343	-	CC2R_00000733				ALOMY5G31919
CC2R	Resistant	m64023e_220409_165810_46990614_ccs	11610	gene						2800	5232	-	CC2R_00000563	PF00071	Ras family	sp|Q7GD79|RAN2_ORYSJ	ALOMY5G31792
CC2R	Resistant	m64023e_220409_165810_46990614_ccs	11610	gene						7702	7926	+	CC2R_00000564				ALOMY0G47025
CC2R	Resistant	m64023e_220409_165810_47056634_ccs	12593	gene						8858	9403	+	CC2R_00000436			sp|P42793|RM05_ARATH	ALOMY1G09790
CC2R	Resistant	m64023e_220409_165810_47056634_ccs	12593	gene						10602	11828	+	CC2R_00000437	PF00033	Cytochrome b/b6/petB	sp|P04165|CYB_MAIZE	ALOMY0G47345
CC2R	Resistant	m64023e_220409_165810_47120610_ccs	6480	gene						4327	5027	-	CC2R_00001177				ALOMY1G01452
CC2R	Resistant	m64023e_220409_165810_47251628_ccs	2460	gene						341	1691	-	CC2R_00001485				ALOMY2G24538
CC2R	Resistant	m64023e_220409_165810_47581860_ccs	20300	gene						17875	20299	-	CC2R_00000043				ALOMY5G32141
CC2R	Resistant	m64023e_220409_165810_47776703_ccs	8640	gene						3577	8158	+	CC2R_00000938	PF07690	Major Facilitator Superfamily	sp|F4IKF6|SPNS3_ARATH	ALOMY3G12685
CC2R	Resistant	m64023e_220409_165810_47776872_ccs	9330	gene						2123	4860	-	CC2R_00000869				ALOMY1G05155
CC2R	Resistant	m64023e_220409_165810_47776872_ccs	9330	gene						5269	6138	-	CC2R_00000870
CC2R	Resistant	m64023e_220409_165810_47778159_ccs	6293	gene						1868	4760	+	CC2R_00001187	PF00290	Tryptophan synthase alpha chain	sp|P42390|TRPA_MAIZE	ALOMY1G01644
CC2R	Resistant	m64023e_220409_165810_47974791_ccs	7230	gene						46	1367	-	CC2R_00001093	PF04195	Putative gypsy type transposon		ALOMY2G20844
CC2R	Resistant	m64023e_220409_165810_47974791_ccs	7230	gene						1384	1794	-	CC2R_00001094				ALOMY2G20844
CC2R	Resistant	m64023e_220409_165810_48170585_ccs	18401	gene						11432	11712	+	CC2R_00000074				ALOMY2G22418
CC2R	Resistant	m64023e_220409_165810_48497702_ccs	12395	gene						5295	8449	-	CC2R_00000459	PF04195	Putative gypsy type transposon		ALOMY1G05155
CC2R	Resistant	m64023e_220409_165810_48497702_ccs	12395	gene						11140	11529	+	CC2R_00000460				ALOMY0G47025
CC2R	Resistant	m64023e_220409_165810_4851893_ccs	16230	gene						12041	12451	-	CC2R_00000164			sp|P05621|H2B2_WHEAT	ALOMY3G10634
CC2R	Resistant	m64023e_220409_165810_49153414_ccs	3390	gene						1568	2600	+	CC2R_00001425				ALOMY4G25517
CC2R	Resistant	m64023e_220409_165810_49348661_ccs01	6908	gene						38	621	+	CC2R_00001135				ALOMY0G48067
CC2R	Resistant	m64023e_220409_165810_49348661_ccs01	6908	gene						6275	6886	+	CC2R_00001136				ALOMY4G29304
CC2R	Resistant	m64023e_220409_165810_49351228_ccs	11918	gene						3995	6170	+	CC2R_00000531				ALOMY2G18079
CC2R	Resistant	m64023e_220409_165810_49546668_ccs	9780	gene						6447	6763	-	CC2R_00000818				ALOMY6G42914
CC2R	Resistant	m64023e_220409_165810_4980850_ccs	17611	gene						14520	14768	-	CC2R_00000105				ALOMY6G42914
CC2R	Resistant	m64023e_220409_165810_50006265_ccs	4800	gene						2307	3896	+	CC2R_00001309
CC2R	Resistant	m64023e_220409_165810_50200902_ccs	4449	gene						869	4402	-	CC2R_00001334	PF00124	Photosynthetic reaction centre protein	sp|A1E9Q4|PSBA_SORBI	ALOMY0G46720
CC2R	Resistant	m64023e_220409_165810_50202262_ccs	3107	gene						101	1339	-	CC2R_00001442	PF00069	Protein kinase domain	sp|O80888|M3K17_ARATH	ALOMY5G32343
CC2R	Resistant	m64023e_220409_165810_50399357_ccs	10770	gene						2775	3821	+	CC2R_00000685	PF13456	Reverse transcriptase-like		ALOMY0G47154
CC2R	Resistant	m64023e_220409_165810_50399357_ccs	10770	gene						4064	6090	+	CC2R_00000686	PF00847	AP2 domain	sp|Q6X5Y6|WRI1_ARATH	ALOMY2G20403	TF
CC2R	Resistant	m64023e_220409_165810_50399357_ccs	10770	gene						6327	7535	+	CC2R_00000687	PF14223	gag-polypeptide of LTR copia-type		ALOMY4G30640
CC2R	Resistant	m64023e_220409_165810_5046871_ccs	14670	gene						336	1621	-	CC2R_00000236			sp|Q9LVI6|RLK90_ARATH	ALOMY7G41213
CC2R	Resistant	m64023e_220409_165810_5046871_ccs	14670	gene						9950	11268	+	CC2R_00000237	PF03140	Plant protein of unknown function	sp|Q9SD53|Y3720_ARATH	ALOMY2G24093
CC2R	Resistant	m64023e_220409_165810_5049074_ccs	7599	gene						2752	6158	+	CC2R_00001059	PF04195	Putative gypsy type transposon		ALOMY1G05155
CC2R	Resistant	m64023e_220409_165810_50529199_ccs	10710	gene						4237	6747	+	CC2R_00000690				ALOMY1G00300
CC2R	Resistant	m64023e_220409_165810_50791246_ccs	9000	gene						2893	3708	-	CC2R_00000905				ALOMY4G29304
CC2R	Resistant	m64023e_220409_165810_51120345_ccs	13020	gene						555	5658	-	CC2R_00000380	PF00240	Ubiquitin family	sp|Q84L30|RD23D_ARATH	ALOMY1G09883
CC2R	Resistant	m64023e_220409_165810_5113921_ccs	10126	gene						1521	2833	+	CC2R_00000769				ALOMY2G21590
CC2R	Resistant	m64023e_220409_165810_5113921_ccs	10126	gene						2843	4285	+	CC2R_00000770				ALOMY2G22830
CC2R	Resistant	m64023e_220409_165810_5113921_ccs	10126	gene						4799	9052	+	CC2R_00000771				ALOMY2G22830
CC2R	Resistant	m64023e_220409_165810_5113921_ccs	10126	gene						8240	9786	-	CC2R_00000772				ALOMY2G21591
CC2R	Resistant	m64023e_220409_165810_51185770_ccs	10290	gene						5739	6527	-	CC2R_00000744				ALOMY4G29304
CC2R	Resistant	m64023e_220409_165810_51315063_ccs	10008	gene						2786	4580	+	CC2R_00000788				ALOMY4G30441
CC2R	Resistant	m64023e_220409_165810_51380435_ccs	3079	gene						1643	2455	-	CC2R_00001445			sp|Q2QZF1|PIK6_ORYSJ	ALOMY7G37289
CC2R	Resistant	m64023e_220409_165810_5179314_ccs	14799	gene						11415	14767	-	CC2R_00000231				ALOMY5G32141
CC2R	Resistant	m64023e_220409_165810_51904926_ccs	8702	gene						4930	5730	+	CC2R_00000931				ALOMY2G22190
CC2R	Resistant	m64023e_220409_165810_51970731_ccs	20758	gene						1699	4255	+	CC2R_00000029	PF04195	Putative gypsy type transposon		ALOMY2G20844
CC2R	Resistant	m64023e_220409_165810_51970731_ccs	20758	gene						4256	4749	+	CC2R_00000030				ALOMY2G20844
CC2R	Resistant	m64023e_220409_165810_51970731_ccs	20758	gene						14888	16004	-	CC2R_00000031	PF00112	Papain family cysteine protease	sp|A2XQE8|SAG39_ORYSI	ALOMY5G35436
CC2R	Resistant	m64023e_220409_165810_51970731_ccs	20758	gene						17724	18841	+	CC2R_00000032	PF00112	Papain family cysteine protease	sp|A2XQE8|SAG39_ORYSI	ALOMY5G34054
CC2R	Resistant	m64023e_220409_165810_52036941_ccs	13440	gene						18	2104	-	CC2R_00000339	PF04195	Putative gypsy type transposon		ALOMY2G20844
CC2R	Resistant	m64023e_220409_165810_52300344_ccs0	1762	gene						156	1559	+	CC2R_00001525	PF00318	Ribosomal protein S2	sp|Q9GCB9|RT02_ARATH	ALOMY0G47835
CC2R	Resistant	m64023e_220409_165810_52300344_ccs01	1766	gene						298	696	+	CC2R_00001523				ALOMY0G47835
CC2R	Resistant	m64023e_220409_165810_52300344_ccs01	1766	gene						1058	1366	+	CC2R_00001524			sp|Q9GCB9|RT02_ARATH	ALOMY0G47655
CC2R	Resistant	m64023e_220409_165810_52560334_ccs	12910	gene						40	776	+	CC2R_00000401	PF00361	Proton-conducting membrane transporter	sp|P58420|NU4C_WHEAT	ALOMY0G47050
CC2R	Resistant	m64023e_220409_165810_52560334_ccs	12910	gene						1187	7258	+	CC2R_00000402	PF00361	Proton-conducting membrane transporter	sp|Q32880|NU5C_POAPR	ALOMY0G47048
CC2R	Resistant	m64023e_220409_165810_52560334_ccs	12910	gene						7260	9371	+	CC2R_00000403	PF00146	NADH dehydrogenase	sp|A1EA64|NU1C_AGRST	ALOMY0G47053
CC2R	Resistant	m64023e_220409_165810_52560334_ccs	12910	gene						9469	10011	+	CC2R_00000404	PF13237	4Fe-4S dicluster domain	sp|A1EA63|NDHI_AGRST	ALOMY0G47052
CC2R	Resistant	m64023e_220409_165810_52560334_ccs	12910	gene						10273	11799	+	CC2R_00000405	PF00499	NADH-ubiquinone/plastoquinone oxidoreductase chain 6	sp|Q95H44|NU6C_WHEAT	ALOMY0G47051
CC2R	Resistant	m64023e_220409_165810_52560334_ccs	12910	gene						12324	12881	+	CC2R_00000406	PF00361	Proton-conducting membrane transporter	sp|P58420|NU4C_WHEAT	ALOMY0G47050
CC2R	Resistant	m64023e_220409_165810_52693095_ccs	9771	gene						5514	8731	+	CC2R_00000824	PF04195	Putative gypsy type transposon		ALOMY1G05155
CC2R	Resistant	m64023e_220409_165810_52955050_ccs	3225	gene						9	206	-	CC2R_00001435				ALOMY5G33809
CC2R	Resistant	m64023e_220409_165810_52955050_ccs	3225	gene						2597	3100	-	CC2R_00001436				ALOMY1G09966
CC2R	Resistant	m64023e_220409_165810_53085126_ccs	9780	gene						317	1650	-	CC2R_00000819	PF00499	NADH-ubiquinone/plastoquinone oxidoreductase chain 6	sp|Q95H44|NU6C_WHEAT	ALOMY0G47051
CC2R	Resistant	m64023e_220409_165810_53085126_ccs	9780	gene						1748	3129	-	CC2R_00000820	PF00146	NADH dehydrogenase	sp|Q32880|NU5C_POAPR	ALOMY0G47048
CC2R	Resistant	m64023e_220409_165810_53085126_ccs	9780	gene						3210	6789	-	CC2R_00000821	PF00361	Proton-conducting membrane transporter	sp|A8Y9D4|NU5C_LOLPR	ALOMY0G47048
CC2R	Resistant	m64023e_220409_165810_53085126_ccs	9780	gene						7199	8563	-	CC2R_00000822	PF00361	Proton-conducting membrane transporter	sp|P58420|NU4C_WHEAT	ALOMY0G47050
CC2R	Resistant	m64023e_220409_165810_53085126_ccs	9780	gene						9564	9731	-	CC2R_00000823	PF00420	NADH-ubiquinone/plastoquinone oxidoreductase chain 4L	sp|P69379|NU4LC_WHEAT	ALOMY0G47038
CC2R	Resistant	m64023e_220409_165810_53347498_ccs	12739	gene						11	2579	+	CC2R_00000417				ALOMY2G24538
CC2R	Resistant	m64023e_220409_165810_53347498_ccs	12739	gene						3300	5914	+	CC2R_00000418				ALOMY2G24538
CC2R	Resistant	m64023e_220409_165810_53479023_ccs	19991	gene						11456	17465	-	CC2R_00000047	PF04195	Putative gypsy type transposon		ALOMY2G20844
CC2R	Resistant	m64023e_220409_165810_53479843_ccs	1486	gene						699	1484	+	CC2R_00001532	PF03317	ELF protein		ALOMY2G21335
CC2R	Resistant	m64023e_220409_165810_53544119_ccs	5900	gene						875	2079	-	CC2R_00001217			sp|Q0IU52|ASP1_ORYSJ	ALOMY1G04102
CC2R	Resistant	m64023e_220409_165810_53544119_ccs	5900	gene						2485	5703	-	CC2R_00001218				ALOMY1G04087
CC2R	Resistant	m64023e_220409_165810_53740115_ccs	13710	gene						2408	7121	-	CC2R_00000305	PF04628	Sedlin, N-terminal conserved region	sp|Q54CU7|TPC2L_DICDI	ALOMY7G41318
CC2R	Resistant	m64023e_220409_165810_53740508_ccs	7650	gene						2886	3593	+	CC2R_00001050				ALOMY3G13485
CC2R	Resistant	m64023e_220409_165810_53740508_ccs	7650	gene						5660	5992	-	CC2R_00001051				ALOMY2G23257
CC2R	Resistant	m64023e_220409_165810_53740548_ccs0	3450	gene						697	1311	-	CC2R_00001419	PF00361	Proton-conducting membrane transporter	sp|P0CD55|NU2C2_WHEAT	ALOMY0G46718
CC2R	Resistant	m64023e_220409_165810_53740548_ccs0	3450	gene						1313	2275	-	CC2R_00001420	PF00361	Proton-conducting membrane transporter	sp|P0CC48|NU2C1_COFAR	ALOMY0G46717
CC2R	Resistant	m64023e_220409_165810_53740548_ccs0	3450	gene						2324	3442	+	CC2R_00001421			sp|Q6ENR3|YCF15_SACOF	ALOMY0G47044
CC2R	Resistant	m64023e_220409_165810_54133662_ccs	7140	gene						1339	1683	+	CC2R_00001105				ALOMY1G04617
CC2R	Resistant	m64023e_220409_165810_54133662_ccs	7140	gene						4379	5540	-	CC2R_00001106				ALOMY2G18940
CC2R	Resistant	m64023e_220409_165810_54134873_ccs	5070	gene						3368	4086	+	CC2R_00001276	PF01058	NADH ubiquinone oxidoreductase, 20 Kd subunit	sp|Q6YXQ9|NDHK_PHYPA	ALOMY5G32516
CC2R	Resistant	m64023e_220409_165810_54265487_ccs	3684	gene						3356	3610	+	CC2R_00001407				ALOMY3G16054
CC2R	Resistant	m64023e_220409_165810_54329867_ccs	6990	gene						21	4014	+	CC2R_00001128	PF00931	NB-ARC domain	sp|Q9LRR4|R13L1_ARATH	ALOMY3G17088
CC2R	Resistant	m64023e_220409_165810_54329867_ccs	6990	gene						4035	5045	+	CC2R_00001129				ALOMY2G23369
CC2R	Resistant	m64023e_220409_165810_54329867_ccs	6990	gene						5463	6566	-	CC2R_00001130	PF13359	DDE superfamily endonuclease	sp|Q9M2U3|ALPL_ARATH	ALOMY3G17088
CC2R	Resistant	m64023e_220409_165810_54460966_ccs	11052	gene						3871	3927	-	CC2R_00000644
CC2R	Resistant	m64023e_220409_165810_54460966_ccs	11052	gene						6584	9645	+	CC2R_00000645				ALOMY5G32141
CC2R	Resistant	m64023e_220409_165810_54658183_ccs	14190	gene						3973	6663	+	CC2R_00000266				ALOMY2G20844
CC2R	Resistant	m64023e_220409_165810_54921498_ccs	14910	gene						4275	5932	-	CC2R_00000217				ALOMY6G44231
CC2R	Resistant	m64023e_220409_165810_55052796_ccs	4863	gene						2712	2918	-	CC2R_00001303
CC2R	Resistant	m64023e_220409_165810_5506497_ccs	12780	gene						3611	6840	-	CC2R_00000413	PF04195	Putative gypsy type transposon		ALOMY1G05155
CC2R	Resistant	m64023e_220409_165810_55182291_ccs	14203	gene						19	382	-	CC2R_00000262
CC2R	Resistant	m64023e_220409_165810_55182291_ccs	14203	gene						996	5072	-	CC2R_00000263				ALOMY4G28523
CC2R	Resistant	m64023e_220409_165810_55182291_ccs	14203	gene						5085	5710	-	CC2R_00000264
CC2R	Resistant	m64023e_220409_165810_55182291_ccs	14203	gene						7135	9559	+	CC2R_00000265				ALOMY4G28429
CC2R	Resistant	m64023e_220409_165810_55183566_ccs	11160	gene						6601	7125	-	CC2R_00000632	PF00098	Zinc knuckle		ALOMY3G14616
CC2R	Resistant	m64023e_220409_165810_55313896_ccs	9863	gene						4089	7035	-	CC2R_00000804				ALOMY2G20844
CC2R	Resistant	m64023e_220409_165810_55378613_ccs	12810	gene						8207	11686	-	CC2R_00000409				ALOMY5G32141
CC2R	Resistant	m64023e_220409_165810_55576065_ccs	13680	gene						8210	8983	+	CC2R_00000308				ALOMY4G29304
CC2R	Resistant	m64023e_220409_165810_55707911_ccs	14700	gene						6486	9419	+	CC2R_00000233	PF04195	Putative gypsy type transposon		ALOMY2G20844
CC2R	Resistant	m64023e_220409_165810_55838013_ccs	20462	gene						1629	2237	-	CC2R_00000036	PF00574	Clp protease	sp|P24064|CLPP_WHEAT	ALOMY0G46731
CC2R	Resistant	m64023e_220409_165810_55838013_ccs	20462	gene						8310	11081	-	CC2R_00000037	PF00411	Ribosomal protein S11	sp|A8Y9B8|RPOA_LOLPR	ALOMY0G46732
CC2R	Resistant	m64023e_220409_165810_55838013_ccs	20462	gene						11398	11601	-	CC2R_00000038	PF00238	Ribosomal protein L14p/L23e	sp|A1E9W1|RK14_SORBI	ALOMY3G17223
CC2R	Resistant	m64023e_220409_165810_55838013_ccs	20462	gene						13220	15203	-	CC2R_00000039	PF00189	Ribosomal protein S3, C-terminal domain	sp|A1E9N0|RK22_HORVU	ALOMY0G46680
CC2R	Resistant	m64023e_220409_165810_55838013_ccs	20462	gene						16131	16896	-	CC2R_00000040	PF00181	Ribosomal Proteins L2, RNA binding domain	sp|A8Y9C8|RK2_LOLPR	ALOMY0G47044
CC2R	Resistant	m64023e_220409_165810_55838013_ccs	20462	gene						17648	19280	+	CC2R_00000041			sp|Q6ENR2|YCF73_SACOF	ALOMY7G37953
CC2R	Resistant	m64023e_220409_165810_55838013_ccs	20462	gene						19952	20434	-	CC2R_00000042	PF00361	Proton-conducting membrane transporter	sp|P0CD55|NU2C2_WHEAT	ALOMY0G46718
CC2R	Resistant	m64023e_220409_165810_55838904_ccs	12720	gene						2182	5299	+	CC2R_00000420	PF04195	Putative gypsy type transposon		ALOMY2G20844
CC2R	Resistant	m64023e_220409_165810_55903780_ccs	17550	gene						7346	10620	+	CC2R_00000109				ALOMY5G32141
CC2R	Resistant	m64023e_220409_165810_55904447_ccs	12420	gene						220	354	+	CC2R_00000458				ALOMY6G42110
CC2R	Resistant	m64023e_220409_165810_56361487_ccs01	5439	gene						1769	2269	+	CC2R_00001254				ALOMY6G42070
CC2R	Resistant	m64023e_220409_165810_56427737_ccs	11105	gene						1211	3096	-	CC2R_00000637				ALOMY1G05155
CC2R	Resistant	m64023e_220409_165810_56427737_ccs	11105	gene						3106	3782	-	CC2R_00000638				ALOMY1G05155
CC2R	Resistant	m64023e_220409_165810_56427737_ccs	11105	gene						3788	4447	-	CC2R_00000639	PF04195	Putative gypsy type transposon		ALOMY1G05155
CC2R	Resistant	m64023e_220409_165810_56494737_ccs	10720	gene						5277	8136	-	CC2R_00000689	PF04195	Putative gypsy type transposon		ALOMY2G20844
CC2R	Resistant	m64023e_220409_165810_56885597_ccs0	5430	gene						602	1693	-	CC2R_00001255	PF00651	BTB/POZ domain	sp|Q9M8J9|BPM2_ARATH	ALOMY4G29839	TR
CC2R	Resistant	m64023e_220409_165810_56953058_ccs	11135	gene						5242	8321	-	CC2R_00000636	PF04195	Putative gypsy type transposon		ALOMY2G20844
CC2R	Resistant	m64023e_220409_165810_57280105_ccs	6582	gene						3711	4397	+	CC2R_00001166				ALOMY2G24538
CC2R	Resistant	m64023e_220409_165810_57540917_ccs01	4465	gene						136	2544	-	CC2R_00001333				ALOMY1G00828
CC2R	Resistant	m64023e_220409_165810_57606517_ccs	17850	gene						12618	12701	+	CC2R_00000095
CC2R	Resistant	m64023e_220409_165810_57738991_ccs	18240	gene						15632	16108	+	CC2R_00000078				ALOMY5G35361
CC2R	Resistant	m64023e_220409_165810_57738991_ccs	18240	gene						16906	17037	-	CC2R_00000079
CC2R	Resistant	m64023e_220409_165810_57739523_ccs	8430	gene						257	2378	+	CC2R_00000961				ALOMY5G32141
CC2R	Resistant	m64023e_220409_165810_58000257_ccs	12180	gene						6652	7467	+	CC2R_00000499				ALOMY4G29304
CC2R	Resistant	m64023e_220409_165810_5834149_ccs	12600	gene						8033	9753	+	CC2R_00000434	PF04195	Putative gypsy type transposon		ALOMY2G20844
CC2R	Resistant	m64023e_220409_165810_5834149_ccs	12600	gene						9774	10968	+	CC2R_00000435				ALOMY2G20844
CC2R	Resistant	m64023e_220409_165810_58526198_ccs	10018	gene						9074	9322	+	CC2R_00000787				ALOMY6G42914
CC2R	Resistant	m64023e_220409_165810_58590727_ccs	5490	gene						2198	2620	+	CC2R_00001248	PF04195	Putative gypsy type transposon		ALOMY1G05155
CC2R	Resistant	m64023e_220409_165810_58590727_ccs	5490	gene						2690	5483	+	CC2R_00001249				ALOMY5G32354
CC2R	Resistant	m64023e_220409_165810_58722801_ccs	6519	gene						2210	2341	+	CC2R_00001169				ALOMY7G38237
CC2R	Resistant	m64023e_220409_165810_58982445_ccs	4947	gene						793	972	+	CC2R_00001290				ALOMY4G30532
CC2R	Resistant	m64023e_220409_165810_58983983_ccs	9388	gene						1	743	+	CC2R_00000865	PF03552	Cellulose synthase	sp|Q84ZN6|CESA8_ORYSJ	ALOMY3G16988
CC2R	Resistant	m64023e_220409_165810_58983983_ccs	9388	gene						2571	3446	+	CC2R_00000866	PF00175	Oxidoreductase NAD-binding domain	sp|P43394|K502_ACTDE	ALOMY3G16987
CC2R	Resistant	m64023e_220409_165810_58983983_ccs	9388	gene						4968	9386	+	CC2R_00000867	PF03552	Cellulose synthase	sp|Q84ZN6|CESA8_ORYSJ	ALOMY3G16988
CC2R	Resistant	m64023e_220409_165810_59049093_ccs01	10290	gene						893	1174	-	CC2R_00000743				ALOMY6G42914
CC2R	Resistant	m64023e_220409_165810_59114018_ccs	14700	gene						1358	1702	+	CC2R_00000234				ALOMY5G35929
CC2R	Resistant	m64023e_220409_165810_59114018_ccs	14700	gene						9257	10040	+	CC2R_00000235				ALOMY4G29304
CC2R	Resistant	m64023e_220409_165810_59247192_ccs	4273	gene						46	822	+	CC2R_00001352	PF00361	Proton-conducting membrane transporter	sp|P0CD17|NU2C2_ORYNI	ALOMY6G44069
CC2R	Resistant	m64023e_220409_165810_59247192_ccs	4273	gene						1491	2546	-	CC2R_00001353	PF10705	Chloroplast protein precursor Ycf15 putative	sp|Q6ENR3|YCF15_SACOF	ALOMY0G47044
CC2R	Resistant	m64023e_220409_165810_59378412_ccs	12903	gene						2	2998	-	CC2R_00000407				ALOMY5G32354
CC2R	Resistant	m64023e_220409_165810_59506954_ccs	11370	gene						1254	3124	-	CC2R_00000600	PF00189	Ribosomal protein S3, C-terminal domain	sp|P27928|RT03_MAIZE	ALOMY7G38500
CC2R	Resistant	m64023e_220409_165810_59506954_ccs	11370	gene						4089	4418	-	CC2R_00000601				ALOMY0G47148
CC2R	Resistant	m64023e_220409_165810_59572830_ccs	10787	gene						551	721	+	CC2R_00000681				ALOMY1G08239
CC2R	Resistant	m64023e_220409_165810_59572830_ccs	10787	gene						1910	5185	+	CC2R_00000682				ALOMY1G08866
CC2R	Resistant	m64023e_220409_165810_59770364_ccs0	16350	gene						7996	9660	+	CC2R_00000157			sp|Q3E8L5|FBL85_ARATH	ALOMY0G48369
CC2R	Resistant	m64023e_220409_165810_59835162_ccs	21082	gene						5314	6528	-	CC2R_00000025				ALOMY7G39957
CC2R	Resistant	m64023e_220409_165810_59835162_ccs	21082	gene						6543	17307	-	CC2R_00000026	PF04195	Putative gypsy type transposon		ALOMY1G05155
CC2R	Resistant	m64023e_220409_165810_59835547_ccs	16740	gene						73	2056	+	CC2R_00000143	PF00189	Ribosomal protein S3, C-terminal domain	sp|A1E9N0|RK22_HORVU	ALOMY0G46680
CC2R	Resistant	m64023e_220409_165810_59835547_ccs	16740	gene						3676	6969	+	CC2R_00000144	PF00411	Ribosomal protein S11	sp|A8Y9B8|RPOA_LOLPR	ALOMY0G46732
CC2R	Resistant	m64023e_220409_165810_59835547_ccs	16740	gene						12989	13639	+	CC2R_00000145	PF00574	Clp protease	sp|P0C314|CLPP_ORYSJ	ALOMY0G46731
CC2R	Resistant	m64023e_220409_165810_59837267_ccs	13620	gene						3679	5917	-	CC2R_00000315				ALOMY2G20844
CC2R	Resistant	m64023e_220409_165810_59837267_ccs	13620	gene						5947	6806	-	CC2R_00000316	PF04195	Putative gypsy type transposon		ALOMY2G20844
CC2R	Resistant	m64023e_220409_165810_59966704_ccs	7020	gene						73	1371	+	CC2R_00001126				ALOMY1G07169
CC2R	Resistant	m64023e_220409_165810_59966704_ccs	7020	gene						2893	5653	-	CC2R_00001127				ALOMY7G40602
CC2R	Resistant	m64023e_220409_165810_60162745_ccs	12660	gene						5488	5820	-	CC2R_00000426				ALOMY6G44941
CC2R	Resistant	m64023e_220409_165810_60424629_ccs	13470	gene						210	752	-	CC2R_00000331	PF13237	4Fe-4S dicluster domain	sp|A1EA63|NDHI_AGRST	ALOMY0G47052
CC2R	Resistant	m64023e_220409_165810_60424629_ccs	13470	gene						849	2959	-	CC2R_00000332	PF00146	NADH dehydrogenase	sp|A1EA64|NU1C_AGRST	ALOMY0G47053
CC2R	Resistant	m64023e_220409_165810_60424629_ccs	13470	gene						2961	4141	-	CC2R_00000333	PF00346	Respiratory-chain NADH dehydrogenase, 49 Kd subunit	sp|P0C337|NDHH_ORYSJ	ALOMY0G47042
CC2R	Resistant	m64023e_220409_165810_60424629_ccs	13470	gene						4709	9549	-	CC2R_00000334	PF00361	Proton-conducting membrane transporter	sp|Q32880|NU5C_POAPR	ALOMY0G47048
CC2R	Resistant	m64023e_220409_165810_60424629_ccs	13470	gene						10328	11466	-	CC2R_00000335	PF00361	Proton-conducting membrane transporter	sp|P58420|NU4C_WHEAT	ALOMY0G47050
CC2R	Resistant	m64023e_220409_165810_60424629_ccs	13470	gene						11853	13378	-	CC2R_00000336	PF00499	NADH-ubiquinone/plastoquinone oxidoreductase chain 6	sp|Q95H44|NU6C_WHEAT	ALOMY0G47051
CC2R	Resistant	m64023e_220409_165810_60556921_ccs	9487	gene						2308	3829	-	CC2R_00000854				ALOMY7G39957
CC2R	Resistant	m64023e_220409_165810_60687677_ccs0	1260	gene						33	689	+	CC2R_00001535				ALOMY1G02118
CC2R	Resistant	m64023e_220409_165810_60687677_ccs01	13111	gene						287	1236	+	CC2R_00000373
CC2R	Resistant	m64023e_220409_165810_60687677_ccs01	13111	gene						2783	5976	+	CC2R_00000374				ALOMY0G47246
CC2R	Resistant	m64023e_220409_165810_60687677_ccs01	13111	gene						7860	9818	+	CC2R_00000375				ALOMY2G20844
CC2R	Resistant	m64023e_220409_165810_60754184_ccs	9834	gene						5819	7997	-	CC2R_00000808	PF00656	Caspase domain	sp|O64517|MCA4_ARATH	ALOMY2G20306
CC2R	Resistant	m64023e_220409_165810_60948789_ccs0	2550	gene						252	548	-	CC2R_00001478				ALOMY6G46312
CC2R	Resistant	m64023e_220409_165810_60948789_ccs0	2550	gene						714	1657	-	CC2R_00001479				ALOMY6G46312
CC2R	Resistant	m64023e_220409_165810_60948789_ccs01	4831	gene						350	1043	-	CC2R_00001305				ALOMY6G46312
CC2R	Resistant	m64023e_220409_165810_60948789_ccs01	4831	gene						1091	3023	-	CC2R_00001306				ALOMY6G46312
CC2R	Resistant	m64023e_220409_165810_60948789_ccs01	4831	gene						4375	4675	-	CC2R_00001307				ALOMY6G46312
CC2R	Resistant	m64023e_220409_165810_60950468_ccs	6456	gene						1631	1891	-	CC2R_00001178	PF01693	Caulimovirus viroplasmin	sp|Q9KEI9|RNH1_BACHD	ALOMY3G10110
CC2R	Resistant	m64023e_220409_165810_60950468_ccs	6456	gene						4470	6002	-	CC2R_00001179				ALOMY1G05014
CC2R	Resistant	m64023e_220409_165810_61016095_ccs	7167	gene						58	2265	-	CC2R_00001103	PF08700	Vps51/Vps67	sp|Q9FFF3|COG1_ARATH	ALOMY2G20158
CC2R	Resistant	m64023e_220409_165810_61342499_ccs	13560	gene						9287	9536	+	CC2R_00000320				ALOMY6G42914
CC2R	Resistant	m64023e_220409_165810_61409662_ccs	12995	gene						3932	4222	-	CC2R_00000381				ALOMY6G42914
CC2R	Resistant	m64023e_220409_165810_61605516_ccs	8940	gene						7058	7288	-	CC2R_00000910				ALOMY6G46255
CC2R	Resistant	m64023e_220409_165810_6161886_ccs	12210	gene						423	2408	-	CC2R_00000495	PF01694	Rhomboid family	sp|Q9FZ81|RBL12_ARATH	ALOMY1G03430
CC2R	Resistant	m64023e_220409_165810_6161886_ccs	12210	gene						2712	5773	-	CC2R_00000496
CC2R	Resistant	m64023e_220409_165810_62261108_ccs	10710	gene						248	1032	-	CC2R_00000691				ALOMY2G20844
CC2R	Resistant	m64023e_220409_165810_62261108_ccs	10710	gene						1110	1328	-	CC2R_00000692				ALOMY2G20844
CC2R	Resistant	m64023e_220409_165810_62261108_ccs	10710	gene						7176	10113	-	CC2R_00000693	PF04195	Putative gypsy type transposon		ALOMY2G20844
CC2R	Resistant	m64023e_220409_165810_62261605_ccs	7526	gene						2149	2493	-	CC2R_00001065				ALOMY5G34151
CC2R	Resistant	m64023e_220409_165810_62261605_ccs	7526	gene						2593	4520	-	CC2R_00001066				ALOMY5G34151
CC2R	Resistant	m64023e_220409_165810_62522630_ccs	9180	gene						2811	6192	+	CC2R_00000882				ALOMY1G05155
CC2R	Resistant	m64023e_220409_165810_63505658_ccs	8022	gene						1564	2959	-	CC2R_00000993	PF12937	F-box-like	sp|Q9FIH4|FB280_ARATH	ALOMY2G18134
CC2R	Resistant	m64023e_220409_165810_63570180_ccs	12630	gene						3344	3597	-	CC2R_00000428				ALOMY6G42914
CC2R	Resistant	m64023e_220409_165810_63701470_ccs	4922	gene						294	2212	-	CC2R_00001292	PF01894	Uncharacterised protein family UPF0047	sp|O14155|YE72_SCHPO	ALOMY1G07737
CC2R	Resistant	m64023e_220409_165810_63899248_ccs	15683	gene						3455	4151	+	CC2R_00000182			sp|P42824|DNJH2_ALLPO	ALOMY5G31570
CC2R	Resistant	m64023e_220409_165810_63899248_ccs	15683	gene						14996	15076	-	CC2R_00000183
CC2R	Resistant	m64023e_220409_165810_63964312_ccs	7800	gene						3405	6252	+	CC2R_00001031				ALOMY7G38152
CC2R	Resistant	m64023e_220409_165810_64029079_ccs	9392	gene						2021	4253	-	CC2R_00000864	PF02458	Transferase family	sp|Q6E593|BEBT1_PETHY	ALOMY7G41100
CC2R	Resistant	m64023e_220409_165810_64162336_ccs	18750	gene						851	5175	-	CC2R_00000067				ALOMY2G20844
CC2R	Resistant	m64023e_220409_165810_64553041_ccs	4950	gene						3267	4484	+	CC2R_00001288	PF05004	Interferon-related developmental regulator (IFRD)		ALOMY1G04318
CC2R	Resistant	m64023e_220409_165810_64621164_ccs	5010	gene						2655	3347	-	CC2R_00001279				ALOMY2G23101
CC2R	Resistant	m64023e_220409_165810_65078183_ccs	12990	gene						3490	3759	-	CC2R_00000382				ALOMY6G42914
CC2R	Resistant	m64023e_220409_165810_65472202_ccs	4255	gene						3414	4169	+	CC2R_00001358	PF13855	Leucine rich repeat	sp|Q9FN37|PSKR2_ARATH	ALOMY5G36852
CC2R	Resistant	m64023e_220409_165810_65473272_ccs	12246	gene						3058	4063	-	CC2R_00000483	PF00182	Chitinase class I	sp|O04138|CHI4_ORYSJ	ALOMY0G47134
CC2R	Resistant	m64023e_220409_165810_65473272_ccs	12246	gene						8253	9120	-	CC2R_00000484	PF00182	Chitinase class I	sp|O24658|CHI59_ARATH	ALOMY0G47134
CC2R	Resistant	m64023e_220409_165810_6555191_ccs	6917	gene						5161	6868	+	CC2R_00001134				ALOMY7G39957
CC2R	Resistant	m64023e_220409_165810_65667563_ccs	9713	gene						6714	6962	-	CC2R_00000832				ALOMY6G42914
CC2R	Resistant	m64023e_220409_165810_66128321_ccs	4410	gene						338	1050	+	CC2R_00001341				ALOMY0G47837
CC2R	Resistant	m64023e_220409_165810_66128321_ccs	4410	gene						4087	4410	+	CC2R_00001342	PF00507	NADH-ubiquinone/plastoquinone oxidoreductase, chain 3	sp|P27062|NU3M_PANGI	ALOMY0G47836
CC2R	Resistant	m64023e_220409_165810_6620134_ccs	6480	gene						2348	5430	+	CC2R_00001176				ALOMY1G09955
CC2R	Resistant	m64023e_220409_165810_66257639_ccs	11264	gene						2980	5413	-	CC2R_00000614	PF00421	Photosystem II protein	sp|P11849|PSBD_HORVU	ALOMY2G18054
CC2R	Resistant	m64023e_220409_165810_66389814_ccs	2340	gene						1139	1363	-	CC2R_00001494
CC2R	Resistant	m64023e_220409_165810_66389814_ccs	2340	gene						1601	2134	-	CC2R_00001495				ALOMY2G23257
CC2R	Resistant	m64023e_220409_165810_66521157_ccs	6240	gene						1467	2256	+	CC2R_00001191	PF00161	Ribosome inactivating protein		ALOMY1G08214
CC2R	Resistant	m64023e_220409_165810_66584715_ccs	16530	gene						5829	6882	-	CC2R_00000152				ALOMY4G29304
CC2R	Resistant	m64023e_220409_165810_66651009_ccs	11700	gene						7358	7630	+	CC2R_00000544				ALOMY6G42914
CC2R	Resistant	m64023e_220409_165810_66652090_ccs	15630	gene						4545	7404	+	CC2R_00000184				ALOMY5G32141
CC2R	Resistant	m64023e_220409_165810_67045469_ccs	6983	gene						1753	2001	+	CC2R_00001131				ALOMY6G42914
CC2R	Resistant	m64023e_220409_165810_67111478_ccs01	7423	gene						1619	2728	-	CC2R_00001078	PF07893	Protein of unknown function (DUF1668)		ALOMY4G29725
CC2R	Resistant	m64023e_220409_165810_67306975_ccs	11259	gene						3179	5131	+	CC2R_00000615	PF05241	EXPERA (EXPanded EBP superfamily)	sp|Q9FTZ2|EBP_ORYSJ	ALOMY1G06435
CC2R	Resistant	m64023e_220409_165810_67306975_ccs	11259	gene						4856	11089	-	CC2R_00000616	PF03108	MuDR family transposase		ALOMY1G06434
CC2R	Resistant	m64023e_220409_165810_67373720_ccs	8820	gene						389	2169	-	CC2R_00000919				ALOMY5G32141
CC2R	Resistant	m64023e_220409_165810_6750453_ccs	5486	gene						2999	5222	+	CC2R_00001250				ALOMY6G46437
CC2R	Resistant	m64023e_220409_165810_68026679_ccs	7710	gene						2036	3065	+	CC2R_00001037				ALOMY2G20283
CC2R	Resistant	m64023e_220409_165810_68028178_ccs	17274	gene						450	1265	+	CC2R_00000114				ALOMY4G29304
CC2R	Resistant	m64023e_220409_165810_68157873_ccs0	17610	gene						15753	16924	-	CC2R_00000106				ALOMY7G38722
CC2R	Resistant	m64023e_220409_165810_6818070_ccs0	2430	gene						61	2229	+	CC2R_00001487	PF00223	Photosystem I psaA/psaB protein	sp|P58311|PSAA_WHEAT	ALOMY0G46726
CC2R	Resistant	m64023e_220409_165810_6818070_ccs01	2430	gene						692	2417	+	CC2R_00001488	PF00223	Photosystem I psaA/psaB protein	sp|P58311|PSAA_WHEAT	ALOMY0G46726
CC2R	Resistant	m64023e_220409_165810_68552342_ccs	8550	gene						4899	7026	+	CC2R_00000941				ALOMY5G31919
CC2R	Resistant	m64023e_220409_165810_688_ccs	2580	gene						2	594	+	CC2R_00001477				ALOMY2G24538
CC2R	Resistant	m64023e_220409_165810_69274026_ccs0	5850	gene						3255	4256	+	CC2R_00001220	PF03106	WRKY DNA -binding domain	sp|Q6EPZ0|WRK62_ORYSJ	ALOMY7G39996	TF
CC2R	Resistant	m64023e_220409_165810_69469350_ccs	23444	gene						22069	23299	+	CC2R_00000015	PF10497	Zinc-finger domain of monoamine-oxidase A repressor R1	sp|Q96GN5|CDA7L_HUMAN	ALOMY5G34402
CC2R	Resistant	m64023e_220409_165810_6948433_ccs	16320	gene						1009	1251	+	CC2R_00000158	PF01693	Caulimovirus viroplasmin	sp|Q9KEI9|RNH1_BACHD	ALOMY3G10110
CC2R	Resistant	m64023e_220409_165810_6948433_ccs	16320	gene						11070	11660	+	CC2R_00000159				ALOMY4G29304
CC2R	Resistant	m64023e_220409_165810_69535546_ccs	12090	gene						4544	6048	-	CC2R_00000516
CC2R	Resistant	m64023e_220409_165810_69863677_ccs	3440	gene						1552	2489	+	CC2R_00001423	PF12776	Myb/SANT-like DNA-binding domain		ALOMY3G15133
CC2R	Resistant	m64023e_220409_165810_7014968_ccs	14430	gene						12256	14336	+	CC2R_00000248	PF00069	Protein kinase domain	sp|Q9ZUP4|CKL5_ARATH	ALOMY1G02275
CC2R	Resistant	m64023e_220409_165810_70190494_ccs	9630	gene						406	854	+	CC2R_00000840				ALOMY3G13147
CC2R	Resistant	m64023e_220409_165810_70254926_ccs	7606	gene						379	1983	-	CC2R_00001058	PF14523	Syntaxin-like protein	sp|P93654|SYP22_ARATH	ALOMY4G27588
CC2R	Resistant	m64023e_220409_165810_70451509_ccs01	6490	gene						3387	4479	-	CC2R_00001175			sp|B6SJQ0|CNR13_MAIZE	ALOMY6G46505
CC2R	Resistant	m64023e_220409_165810_70518507_ccs	8910	gene						4873	7058	-	CC2R_00000911	PF01015	Ribosomal S3Ae family	sp|P49397|RS3A_ORYSJ	ALOMY5G31542
CC2R	Resistant	m64023e_220409_165810_7080338_ccs	15613	gene						10109	12578	-	CC2R_00000186				ALOMY5G32354
CC2R	Resistant	m64023e_220409_165810_71041515_ccs	6018	gene						2664	4576	+	CC2R_00001206	PF05634	APO RNA-binding	sp|Q9XIR4|APO1_ARATH	ALOMY3G11788
CC2R	Resistant	m64023e_220409_165810_71435460_ccs	13458	gene						6677	8569	-	CC2R_00000338				ALOMY5G32664
CC2R	Resistant	m64023e_220409_165810_71435928_ccs	5820	gene						726	956	+	CC2R_00001223				ALOMY6G45190
CC2R	Resistant	m64023e_220409_165810_71435928_ccs	5820	gene						1056	1457	+	CC2R_00001224				ALOMY2G25005
CC2R	Resistant	m64023e_220409_165810_71696556_ccs0	3120	gene						516	1517	-	CC2R_00001439				ALOMY3G15428
CC2R	Resistant	m64023e_220409_165810_71829352_ccs	14280	gene						9866	13104	-	CC2R_00000259	PF04195	Putative gypsy type transposon		ALOMY1G05155
CC2R	Resistant	m64023e_220409_165810_72092249_ccs	17670	gene						49	399	+	CC2R_00000099	PF00515	Tetratricopeptide repeat	sp|Q5XEP2|HSOP2_ARATH	ALOMY7G37906
CC2R	Resistant	m64023e_220409_165810_72092249_ccs	17670	gene						7897	11119	+	CC2R_00000100	PF04195	Putative gypsy type transposon		ALOMY2G20844
CC2R	Resistant	m64023e_220409_165810_721008_ccs	14880	gene						1221	3578	+	CC2R_00000220	PF03352	Methyladenine glycosylase	sp|P05100|3MG1_ECOLI	ALOMY2G20305
CC2R	Resistant	m64023e_220409_165810_72354507_ccs	5010	gene						234	1282	-	CC2R_00001280				ALOMY1G02102
CC2R	Resistant	m64023e_220409_165810_72354507_ccs	5010	gene						3313	3675	-	CC2R_00001281				ALOMY1G02559
CC2R	Resistant	m64023e_220409_165810_72614076_ccs	13770	gene						20	247	+	CC2R_00000299			sp|O03060|NU4C_HORVU	ALOMY0G47050
CC2R	Resistant	m64023e_220409_165810_72614076_ccs	13770	gene						396	1325	-	CC2R_00000300	PF01578	Cytochrome C assembly protein	sp|A1EA58|CCSA_AGRST	ALOMY0G47049
CC2R	Resistant	m64023e_220409_165810_72614076_ccs	13770	gene						3356	6309	+	CC2R_00000301	PF00361	Proton-conducting membrane transporter	sp|A8Y9D4|NU5C_LOLPR	ALOMY0G47048
CC2R	Resistant	m64023e_220409_165810_72614076_ccs	13770	gene						6447	12105	+	CC2R_00000302	PF00346	Respiratory-chain NADH dehydrogenase, 49 Kd subunit	sp|P0C337|NDHH_ORYSJ	ALOMY0G47042
CC2R	Resistant	m64023e_220409_165810_72614076_ccs	13770	gene						12630	13667	+	CC2R_00000303	PF00361	Proton-conducting membrane transporter	sp|P58420|NU4C_WHEAT	ALOMY0G47050
CC2R	Resistant	m64023e_220409_165810_72813352_ccs00	8790	gene						5064	5667	+	CC2R_00000921				ALOMY4G25529
CC2R	Resistant	m64023e_220409_165810_72876640_ccs	13290	gene						7381	10054	+	CC2R_00000347	PF04195	Putative gypsy type transposon		ALOMY1G05155
CC2R	Resistant	m64023e_220409_165810_72876640_ccs	13290	gene						10056	10577	+	CC2R_00000348				ALOMY1G06605
CC2R	Resistant	m64023e_220409_165810_72942022_ccs	8002	gene						3170	5683	-	CC2R_00001001	PF03094	Mlo family	sp|O49873|MLOH1_HORVU	ALOMY6G46648
CC2R	Resistant	m64023e_220409_165810_73074629_ccs	7980	gene						6428	6682	-	CC2R_00001009
CC2R	Resistant	m64023e_220409_165810_73270370_ccs	8190	gene						1	2803	-	CC2R_00000984	PF04195	Putative gypsy type transposon		ALOMY1G05155
CC2R	Resistant	m64023e_220409_165810_7340980_ccs	13140	gene						674	2355	+	CC2R_00000372				ALOMY4G25667
CC2R	Resistant	m64023e_220409_165810_73795442_ccs	9904	gene						1549	3417	+	CC2R_00000794	PF00931	NB-ARC domain	sp|P0DO10|PIKS2_ORYSJ	ALOMY5G32537
CC2R	Resistant	m64023e_220409_165810_73795442_ccs	9904	gene						3428	3831	+	CC2R_00000795				ALOMY5G32537
CC2R	Resistant	m64023e_220409_165810_73795442_ccs	9904	gene						8027	8761	+	CC2R_00000796	PF18052	Rx N-terminal domain	sp|P0DO10|PIKS2_ORYSJ	ALOMY5G32539
CC2R	Resistant	m64023e_220409_165810_73795442_ccs	9904	gene						8880	9666	+	CC2R_00000797				ALOMY5G32539
CC2R	Resistant	m64023e_220409_165810_73795624_ccs	9480	gene						1267	4203	+	CC2R_00000855	PF04195	Putative gypsy type transposon		ALOMY2G20844
CC2R	Resistant	m64023e_220409_165810_73796279_ccs	5788	gene						1923	2473	+	CC2R_00001226				ALOMY6G46534
CC2R	Resistant	m64023e_220409_165810_73796279_ccs	5788	gene						2509	4724	+	CC2R_00001227
CC2R	Resistant	m64023e_220409_165810_73796279_ccs	5788	gene						4776	5024	+	CC2R_00001228				ALOMY0G48485
CC2R	Resistant	m64023e_220409_165810_73861581_ccs	10221	gene						5461	6015	+	CC2R_00000749				ALOMY4G29304
CC2R	Resistant	m64023e_220409_165810_73924907_ccs01	7918	gene						4564	7610	+	CC2R_00001015	PF04195	Putative gypsy type transposon		ALOMY2G20844
CC2R	Resistant	m64023e_220409_165810_73992955_ccs0	2618	gene						114	470	+	CC2R_00001472			sp|P58420|NU4C_WHEAT	ALOMY0G47050
CC2R	Resistant	m64023e_220409_165810_73992955_ccs0	2618	gene						622	1386	-	CC2R_00001473	PF01578	Cytochrome C assembly protein	sp|A1EA58|CCSA_AGRST	ALOMY0G47049
CC2R	Resistant	m64023e_220409_165810_73992955_ccs0	2618	gene						1725	2609	+	CC2R_00001474	PF00361	Proton-conducting membrane transporter	sp|P58420|NU4C_WHEAT	ALOMY0G47050
CC2R	Resistant	m64023e_220409_165810_73992955_ccs01	2616	gene						54	817	+	CC2R_00001475	PF00361	Proton-conducting membrane transporter	sp|P58420|NU4C_WHEAT	ALOMY0G47050
CC2R	Resistant	m64023e_220409_165810_73992955_ccs01	2616	gene						1228	2599	+	CC2R_00001476	PF00361	Proton-conducting membrane transporter	sp|O03060|NU4C_HORVU	ALOMY0G47050
CC2R	Resistant	m64023e_220409_165810_7407453_ccs	4590	gene						1121	2700	-	CC2R_00001327	PF00481	Protein phosphatase 2C	sp|Q6L5H6|P2C50_ORYSJ	ALOMY5G32424		CC5
CC2R	Resistant	m64023e_220409_165810_7407453_ccs	4590	gene						3852	4533	+	CC2R_00001328	PF00481	Protein phosphatase 2C	sp|Q6L5H6|P2C50_ORYSJ	ALOMY2G21064
CC2R	Resistant	m64023e_220409_165810_74123005_ccs	11610	gene						297	608	-	CC2R_00000561				ALOMY0G48500
CC2R	Resistant	m64023e_220409_165810_74123005_ccs	11610	gene						6537	7310	+	CC2R_00000562	PF04578	Protein of unknown function, DUF594		ALOMY6G46267
CC2R	Resistant	m64023e_220409_165810_74187448_ccs01	3791	gene						2929	3030	-	CC2R_00001400
CC2R	Resistant	m64023e_220409_165810_74253689_ccs	13200	gene						995	1213	+	CC2R_00000357
CC2R	Resistant	m64023e_220409_165810_74253689_ccs	13200	gene						5560	10401	+	CC2R_00000358	PF00612	IQ calmodulin-binding motif	sp|Q9FXI5|IQD32_ARATH	ALOMY3G10817
CC2R	Resistant	m64023e_220409_165810_74646294_ccs	14661	gene						5950	12968	+	CC2R_00000238	PF00346	Respiratory-chain NADH dehydrogenase, 49 Kd subunit	sp|P0C337|NDHH_ORYSJ	ALOMY0G47042
CC2R	Resistant	m64023e_220409_165810_74646294_ccs	14661	gene						13477	14514	+	CC2R_00000239	PF00361	Proton-conducting membrane transporter	sp|P58420|NU4C_WHEAT	ALOMY0G47050
CC2R	Resistant	m64023e_220409_165810_74646492_ccs	15442	gene						7562	9558	-	CC2R_00000190			sp|Q8GVE8|CAPP4_ARATH	ALOMY7G37007
CC2R	Resistant	m64023e_220409_165810_74910040_ccs0	4020	gene						67	3437	+	CC2R_00001379	PF00931	NB-ARC domain	sp|Q7XA42|RGA1_SOLBU	ALOMY5G35709
CC2R	Resistant	m64023e_220409_165810_75368494_ccs	12330	gene						31	1427	+	CC2R_00000464	PF00499	NADH-ubiquinone/plastoquinone oxidoreductase chain 6	sp|Q95H44|NU6C_WHEAT	ALOMY0G47051
CC2R	Resistant	m64023e_220409_165810_75368494_ccs	12330	gene						1955	3319	+	CC2R_00000465	PF00361	Proton-conducting membrane transporter	sp|P58420|NU4C_WHEAT	ALOMY0G47050
CC2R	Resistant	m64023e_220409_165810_75368494_ccs	12330	gene						3730	9198	+	CC2R_00000466	PF00346	Respiratory-chain NADH dehydrogenase, 49 Kd subunit	sp|Q32880|NU5C_POAPR	ALOMY0G47048
CC2R	Resistant	m64023e_220409_165810_75368494_ccs	12330	gene						9200	11309	+	CC2R_00000467	PF00146	NADH dehydrogenase	sp|A1EA64|NU1C_AGRST	ALOMY0G47053
CC2R	Resistant	m64023e_220409_165810_75368494_ccs	12330	gene						11407	11949	+	CC2R_00000468	PF13237	4Fe-4S dicluster domain	sp|A1EA63|NDHI_AGRST	ALOMY0G47052
CC2R	Resistant	m64023e_220409_165810_75497911_ccs	12739	gene						6025	7102	-	CC2R_00000416				ALOMY2G25194
CC2R	Resistant	m64023e_220409_165810_75499755_ccs	11371	gene						125	292	+	CC2R_00000595	PF00420	NADH-ubiquinone/plastoquinone oxidoreductase chain 4L	sp|P69379|NU4LC_WHEAT	ALOMY0G47038
CC2R	Resistant	m64023e_220409_165810_75499755_ccs	11371	gene						1156	2660	+	CC2R_00000596	PF00361	Proton-conducting membrane transporter	sp|P58420|NU4C_WHEAT	ALOMY0G47050
CC2R	Resistant	m64023e_220409_165810_75499755_ccs	11371	gene						3072	11090	+	CC2R_00000597	PF00361	Proton-conducting membrane transporter	sp|Q32880|NU5C_POAPR	ALOMY0G47053
CC2R	Resistant	m64023e_220409_165810_75628911_ccs	8670	gene						2378	5504	-	CC2R_00000932				ALOMY5G32354
CC2R	Resistant	m64023e_220409_165810_75694239_ccs	12615	gene						3687	9921	+	CC2R_00000429				ALOMY5G31642
CC2R	Resistant	m64023e_220409_165810_75694239_ccs	12615	gene						6794	11589	-	CC2R_00000430	PF01397	Terpene synthase, N-terminal domain	sp|Q29VN3|TPS8_MAIZE	ALOMY2G18302
CC2R	Resistant	m64023e_220409_165810_75825426_ccs	6347	gene						800	1340	-	CC2R_00001184	PF00283	Cytochrome b559, alpha (gene psbE) and beta (gene psbF)subunits	sp|Q5SD42|PSBF_HUPLU	ALOMY0G47274
CC2R	Resistant	m64023e_220409_165810_75825426_ccs	6347	gene						2694	5376	-	CC2R_00001185	PF16639	Apocytochrome F, N-terminal	sp|A1EA21|CYF_AGRST	ALOMY3G17219
CC2R	Resistant	m64023e_220409_165810_75956227_ccs	14829	gene						11998	13948	-	CC2R_00000229	PF04819	Family of unknown function (DUF716)		ALOMY1G07491
CC2R	Resistant	m64023e_220409_165810_75957786_ccs	6750	gene						1805	6542	+	CC2R_00001151				ALOMY4G28529
CC2R	Resistant	m64023e_220409_165810_75957786_ccs	6750	gene						1848	6445	-	CC2R_00001152				ALOMY2G22309
CC2R	Resistant	m64023e_220409_165810_7602182_ccs	6088	gene						5578	5835	+	CC2R_00001199				ALOMY5G31918
CC2R	Resistant	m64023e_220409_165810_76089084_ccs	11400	gene						136	2251	-	CC2R_00000591				ALOMY1G05155
CC2R	Resistant	m64023e_220409_165810_76416919_ccs	10890	gene						9190	10721	+	CC2R_00000669				ALOMY1G06605
CC2R	Resistant	m64023e_220409_165810_76548504_ccs	7718	gene						4919	5734	+	CC2R_00001035				ALOMY4G29304
CC2R	Resistant	m64023e_220409_165810_76548504_ccs	7718	gene						6221	6534	-	CC2R_00001036				ALOMY6G42914
CC2R	Resistant	m64023e_220409_165810_76808875_ccs	13530	gene						192	1863	+	CC2R_00000322				ALOMY1G03867
CC2R	Resistant	m64023e_220409_165810_76808875_ccs	13530	gene						10060	11171	-	CC2R_00000323				ALOMY2G20844
CC2R	Resistant	m64023e_220409_165810_76808875_ccs	13530	gene						11272	12994	-	CC2R_00000324	PF04195	Putative gypsy type transposon		ALOMY2G20844
CC2R	Resistant	m64023e_220409_165810_76940101_ccs	6840	gene						2807	3263	-	CC2R_00001143				ALOMY1G05983
CC2R	Resistant	m64023e_220409_165810_77004953_ccs	7659	gene						6552	7237	-	CC2R_00001047				ALOMY5G36834
CC2R	Resistant	m64023e_220409_165810_77004953_ccs	7659	gene						7321	7503	-	CC2R_00001048
CC2R	Resistant	m64023e_220409_165810_77332717_ccs	2645	gene						1897	2634	+	CC2R_00001471	PF08246	Cathepsin propeptide inhibitor domain (I29)		ALOMY5G36484
CC2R	Resistant	m64023e_220409_165810_7735238_ccs	8970	gene						6905	8045	+	CC2R_00000908				ALOMY7G41384
CC2R	Resistant	m64023e_220409_165810_77400806_ccs	8301	gene						773	7449	-	CC2R_00000972	PF10699	Male gamete fusion factor	sp|F4JP36|HAP2_ARATH	ALOMY5G32077
CC2R	Resistant	m64023e_220409_165810_77660986_ccs	7642	gene						1118	1945	+	CC2R_00001052	PF13561	Enoyl-(Acyl carrier protein) reductase	sp|A0A1A9TAK5|NR_NARPS	ALOMY1G04760
CC2R	Resistant	m64023e_220409_165810_77660986_ccs	7642	gene						4831	5007	+	CC2R_00001053				ALOMY2G23596
CC2R	Resistant	m64023e_220409_165810_77791855_ccs	12660	gene						6483	6929	-	CC2R_00000424				ALOMY5G31918
CC2R	Resistant	m64023e_220409_165810_77791855_ccs	12660	gene						7711	11552	-	CC2R_00000425				ALOMY5G31919
CC2R	Resistant	m64023e_220409_165810_77858204_ccs	8100	gene						3994	4909	+	CC2R_00000989	PF04195	Putative gypsy type transposon		ALOMY1G05155
CC2R	Resistant	m64023e_220409_165810_77858204_ccs	8100	gene						5071	7204	+	CC2R_00000990				ALOMY1G06605
CC2R	Resistant	m64023e_220409_165810_77989061_ccs	9762	gene						8463	8660	-	CC2R_00000825				ALOMY6G42914
CC2R	Resistant	m64023e_220409_165810_78053685_ccs0	420	gene						38	277	+	CC2R_00001541				ALOMY3G10318
CC2R	Resistant	m64023e_220409_165810_78053685_ccs01	6775	gene						914	1194	-	CC2R_00001150				ALOMY5G33259
CC2R	Resistant	m64023e_220409_165810_78252471_ccs	7795	gene						4510	5457	-	CC2R_00001032	PF00043	Glutathione S-transferase, C-terminal domain	sp|O65857|GSTF1_ORYSJ	ALOMY3G11302		Both
CC2R	Resistant	m64023e_220409_165810_78317365_ccs	16890	gene						4543	7482	-	CC2R_00000140	PF04195	Putative gypsy type transposon		ALOMY5G32141
CC2R	Resistant	m64023e_220409_165810_78513085_ccs	9401	gene						1047	2765	+	CC2R_00000862				ALOMY6G43905
CC2R	Resistant	m64023e_220409_165810_78513085_ccs	9401	gene						1311	3105	-	CC2R_00000863				ALOMY5G33489
CC2R	Resistant	m64023e_220409_165810_786951_ccs	4920	gene						1930	2904	+	CC2R_00001297	PF13837	Myb/SANT-like DNA-binding domain	sp|Q9LJG8|ASIL2_ARATH	ALOMY2G21374	TF
CC2R	Resistant	m64023e_220409_165810_78710476_ccs	11220	gene						870	1181	-	CC2R_00000621	PF01988	VIT family	sp|Q9M2C0|VITH4_ARATH	ALOMY3G10451
CC2R	Resistant	m64023e_220409_165810_78711568_ccs	10967	gene						9269	9531	+	CC2R_00000657				ALOMY6G42914
CC2R	Resistant	m64023e_220409_165810_78907977_ccs	8301	gene						2597	4960	-	CC2R_00000973	PF02902	Ulp1 protease family, C-terminal catalytic domain	sp|Q8GYL3|ULP1A_ARATH	ALOMY7G38464
CC2R	Resistant	m64023e_220409_165810_79104040_ccs	9510	gene						2873	3337	+	CC2R_00000852				ALOMY1G09961
CC2R	Resistant	m64023e_220409_165810_79104040_ccs	9510	gene						5578	6186	+	CC2R_00000853	PF04408	Helicase associated domain (HA2)	sp|Q93Y16|DEAH4_ARATH	ALOMY1G03793
CC2R	Resistant	m64023e_220409_165810_79301367_ccs	8479	gene						3259	4399	-	CC2R_00000950				ALOMY7G39957
CC2R	Resistant	m64023e_220409_165810_79301367_ccs	8479	gene						7316	8477	+	CC2R_00000951				ALOMY7G39957
CC2R	Resistant	m64023e_220409_165810_7931387_ccs	2510	gene						838	1278	+	CC2R_00001483				ALOMY4G28211
CC2R	Resistant	m64023e_220409_165810_79429974_ccs	12438	gene						5248	8186	-	CC2R_00000455	PF04195	Putative gypsy type transposon		ALOMY2G20844
CC2R	Resistant	m64023e_220409_165810_79561702_ccs	13440	gene						4930	12798	+	CC2R_00000340	PF00270	DEAD/DEAH box helicase	sp|Q588V7|TEB_ARATH	ALOMY7G38334
CC2R	Resistant	m64023e_220409_165810_79757714_ccs01	17978	gene						6320	8147	-	CC2R_00000085				ALOMY2G20844
CC2R	Resistant	m64023e_220409_165810_79757714_ccs01	17978	gene						8909	9280	-	CC2R_00000086				ALOMY2G20844
CC2R	Resistant	m64023e_220409_165810_79890098_ccs	3186	gene						131	373	+	CC2R_00001437				ALOMY6G42914
CC2R	Resistant	m64023e_220409_165810_79955819_ccs	11640	gene						1575	10545	-	CC2R_00000551	PF00124	Photosynthetic reaction centre protein	sp|P56318|PSBA_CHLVU	ALOMY0G46720
CC2R	Resistant	m64023e_220409_165810_79955819_ccs	11640	gene						10666	11637	+	CC2R_00000552	PF00124	Photosynthetic reaction centre protein	sp|P11849|PSBD_HORVU	ALOMY2G18054
CC2R	Resistant	m64023e_220409_165810_80152472_ccs	3270	gene						574	1389	+	CC2R_00001430				ALOMY4G30212
CC2R	Resistant	m64023e_220409_165810_80415543_ccs	7638	gene						2078	3613	+	CC2R_00001054	PF01824	MatK/TrnK amino terminal region	sp|Q9MUZ4|MATK_PHLPR	ALOMY0G46721
CC2R	Resistant	m64023e_220409_165810_80415543_ccs	7638	gene						4278	5231	+	CC2R_00001055	PF00124	Photosynthetic reaction centre protein	sp|A1E9Y8|PSBA_AGRST	ALOMY0G46720
CC2R	Resistant	m64023e_220409_165810_80415572_ccs	4710	gene						509	712	-	CC2R_00001315				ALOMY7G37679
CC2R	Resistant	m64023e_220409_165810_80478606_ccs	9867	gene						3689	7128	+	CC2R_00000803	PF04195	Putative gypsy type transposon		ALOMY1G05155
CC2R	Resistant	m64023e_220409_165810_8062680_ccs	7560	gene						4873	5247	-	CC2R_00001064
CC2R	Resistant	m64023e_220409_165810_80675943_ccs	20280	gene						13774	14585	-	CC2R_00000044			sp|Q8RZV7|MSP1_ORYSJ	ALOMY4G31160
CC2R	Resistant	m64023e_220409_165810_80806060_ccs	4760	gene						1332	2191	+	CC2R_00001311				ALOMY4G29304
CC2R	Resistant	m64023e_220409_165810_80872850_ccs	10290	gene						76	3304	-	CC2R_00000746	PF04195	Putative gypsy type transposon		ALOMY5G32354
CC2R	Resistant	m64023e_220409_165810_81002733_ccs0	14070	gene						7425	8526	+	CC2R_00000284				ALOMY3G16760
CC2R	Resistant	m64023e_220409_165810_81070594_ccs	5361	gene						28	2462	-	CC2R_00001262				ALOMY1G05155
CC2R	Resistant	m64023e_220409_165810_81133887_ccs	17935	gene						5350	8134	+	CC2R_00000088	PF13041	PPR repeat family	sp|Q9FMQ1|PP376_ARATH	ALOMY2G17906
CC2R	Resistant	m64023e_220409_165810_81136427_ccs	15524	gene						7118	8825	-	CC2R_00000187				ALOMY2G22418
CC2R	Resistant	m64023e_220409_165810_81593577_ccs	11626	gene						6095	6366	-	CC2R_00000560				ALOMY6G42914
CC2R	Resistant	m64023e_220409_165810_81594500_ccs01	4880	gene						1729	2122	+	CC2R_00001302				ALOMY2G17818
CC2R	Resistant	m64023e_220409_165810_81724973_ccs	7740	gene						1289	2134	+	CC2R_00001034				ALOMY2G24538
CC2R	Resistant	m64023e_220409_165810_8194203_ccs	6168	gene						705	1173	+	CC2R_00001193				ALOMY3G12263
CC2R	Resistant	m64023e_220409_165810_81988096_ccs	14820	gene						796	3776	+	CC2R_00000230				ALOMY2G20844
CC2R	Resistant	m64023e_220409_165810_82184258_ccs0	13260	gene						5316	8731	-	CC2R_00000352	PF04195	Putative gypsy type transposon		ALOMY1G05155
CC2R	Resistant	m64023e_220409_165810_82184258_ccs0	13260	gene						10153	10637	+	CC2R_00000353	PF10536	Plant mobile domain	sp|Q9LNG5|PPP7L_ARATH	ALOMY4G29456
CC2R	Resistant	m64023e_220409_165810_82184258_ccs0	13260	gene						10969	12445	+	CC2R_00000354				ALOMY1G01006
CC2R	Resistant	m64023e_220409_165810_82314965_ccs	4740	gene						719	3878	+	CC2R_00001312	PF00628	PHD-finger	sp|B9RU15|ATXR5_RICCO	ALOMY2G18102	TR
CC2R	Resistant	m64023e_220409_165810_82380406_ccs	12705	gene						1183	3081	+	CC2R_00000421	PF04195	Putative gypsy type transposon		ALOMY1G05155
CC2R	Resistant	m64023e_220409_165810_82380406_ccs	12705	gene						3106	4376	+	CC2R_00000422				ALOMY1G05155
CC2R	Resistant	m64023e_220409_165810_82774155_ccs	13772	gene						5751	6236	+	CC2R_00000298				ALOMY5G36296
CC2R	Resistant	m64023e_220409_165810_83167472_ccs	13396	gene						9249	9500	+	CC2R_00000343				ALOMY6G42914
CC2R	Resistant	m64023e_220409_165810_83298327_ccs	9061	gene						6126	6941	+	CC2R_00000896				ALOMY4G29304
CC2R	Resistant	m64023e_220409_165810_83363010_ccs	4436	gene						2820	4027	-	CC2R_00001336				ALOMY5G32862
CC2R	Resistant	m64023e_220409_165810_83363889_ccs	10980	gene						3032	3742	+	CC2R_00000651	PF04195	Putative gypsy type transposon		ALOMY1G05155
CC2R	Resistant	m64023e_220409_165810_83363889_ccs	10980	gene						3793	6258	+	CC2R_00000652				ALOMY1G05155
CC2R	Resistant	m64023e_220409_165810_83428220_ccs01	5826	gene						4177	5608	-	CC2R_00001222				ALOMY3G13376
CC2R	Resistant	m64023e_220409_165810_83886498_ccs	7359	gene						7147	7290	-	CC2R_00001083
CC2R	Resistant	m64023e_220409_165810_83887076_ccs	6867	gene						3201	4568	-	CC2R_00001141			sp|Q2R8L1|RGA5S_ORYSJ	ALOMY5G31531
CC2R	Resistant	m64023e_220409_165810_83954322_ccs	13140	gene						1435	2301	+	CC2R_00000370				ALOMY3G10121
CC2R	Resistant	m64023e_220409_165810_83954322_ccs	13140	gene						3739	4017	-	CC2R_00000371				ALOMY6G42914
CC2R	Resistant	m64023e_220409_165810_84215492_ccs	12973	gene						2	397	+	CC2R_00000383	PF00146	NADH dehydrogenase	sp|A1EA64|NU1C_AGRST	ALOMY6G44543
CC2R	Resistant	m64023e_220409_165810_84215492_ccs	12973	gene						495	1037	+	CC2R_00000384	PF13237	4Fe-4S dicluster domain	sp|A1EA63|NDHI_AGRST	ALOMY0G47052
CC2R	Resistant	m64023e_220409_165810_84215492_ccs	12973	gene						1299	2823	+	CC2R_00000385	PF00499	NADH-ubiquinone/plastoquinone oxidoreductase chain 6	sp|Q95H44|NU6C_WHEAT	ALOMY0G47051
CC2R	Resistant	m64023e_220409_165810_84215492_ccs	12973	gene						3348	4712	+	CC2R_00000386	PF00361	Proton-conducting membrane transporter	sp|P58420|NU4C_WHEAT	ALOMY0G47050
CC2R	Resistant	m64023e_220409_165810_84215492_ccs	12973	gene						5123	9117	+	CC2R_00000387	PF00361	Proton-conducting membrane transporter	sp|A8Y9D4|NU5C_LOLPR	ALOMY0G47048
CC2R	Resistant	m64023e_220409_165810_84215492_ccs	12973	gene						9152	11258	+	CC2R_00000388	PF00346	Respiratory-chain NADH dehydrogenase, 49 Kd subunit	sp|P0C337|NDHH_ORYSJ	ALOMY0G47042
CC2R	Resistant	m64023e_220409_165810_84215492_ccs	12973	gene						11260	12926	+	CC2R_00000389	PF00146	NADH dehydrogenase	sp|A1EA64|NU1C_AGRST	ALOMY0G47053
CC2R	Resistant	m64023e_220409_165810_84344904_ccs	6750	gene						3322	5335	+	CC2R_00001153	PF10536	Plant mobile domain	sp|Q9LNG5|PPP7L_ARATH	ALOMY5G33942
CC2R	Resistant	m64023e_220409_165810_84542591_ccs	10200	gene						4430	4624	-	CC2R_00000754
CC2R	Resistant	m64023e_220409_165810_84543022_ccs	14190	gene						4664	5587	-	CC2R_00000267				ALOMY2G20844
CC2R	Resistant	m64023e_220409_165810_84543022_ccs	14190	gene						5759	6301	-	CC2R_00000268	PF04195	Putative gypsy type transposon		ALOMY2G20844
CC2R	Resistant	m64023e_220409_165810_84543022_ccs	14190	gene						6332	6686	-	CC2R_00000269
CC2R	Resistant	m64023e_220409_165810_84739833_ccs	9071	gene						3780	5308	-	CC2R_00000894				ALOMY0G48479
CC2R	Resistant	m64023e_220409_165810_84739833_ccs	9071	gene						6146	6385	-	CC2R_00000895
CC2R	Resistant	m64023e_220409_165810_84871703_ccs	13170	gene						7923	8492	+	CC2R_00000366				ALOMY4G29304
CC2R	Resistant	m64023e_220409_165810_85198534_ccs	10590	gene						9222	10037	-	CC2R_00000711				ALOMY4G29304
CC2R	Resistant	m64023e_220409_165810_85198616_ccs	16717	gene						5408	8838	-	CC2R_00000149	PF04195	Putative gypsy type transposon		ALOMY1G05155
CC2R	Resistant	m64023e_220409_165810_85329441_ccs	14108	gene						5284	8219	-	CC2R_00000282				ALOMY2G20844
CC2R	Resistant	m64023e_220409_165810_85460538_ccs0	1027	gene						28	408	+	CC2R_00001536			sp|Q0D5R2|CRK10_ORYSJ	ALOMY2G24038
CC2R	Resistant	m64023e_220409_165810_85722398_ccs	16110	gene						11720	11989	+	CC2R_00000171				ALOMY6G42914
CC2R	Resistant	m64023e_220409_165810_85788100_ccs	4110	gene						2841	3227	-	CC2R_00001374				ALOMY3G11799
CC2R	Resistant	m64023e_220409_165810_85853776_ccs	3990	gene						1813	3144	-	CC2R_00001381				ALOMY3G14409
CC2R	Resistant	m64023e_220409_165810_86051178_ccs	12460	gene						12027	12206	+	CC2R_00000453				ALOMY6G42914
CC2R	Resistant	m64023e_220409_165810_86115274_ccs	11692	gene						3355	8681	+	CC2R_00000546				ALOMY5G32354
CC2R	Resistant	m64023e_220409_165810_86180533_ccs	4890	gene						2736	3086	-	CC2R_00001300	PF13912	C2H2-type zinc finger		ALOMY1G07975	TF
CC2R	Resistant	m64023e_220409_165810_86311473_ccs	10560	gene						3382	3510	-	CC2R_00000719
CC2R	Resistant	m64023e_220409_165810_86311473_ccs	10560	gene						8938	9753	+	CC2R_00000720				ALOMY4G29304
CC2R	Resistant	m64023e_220409_165810_86444598_ccs	2430	gene						156	2415	-	CC2R_00001491			sp|P62614|ATPB_AEGCR	ALOMY0G46729
CC2R	Resistant	m64023e_220409_165810_86574116_ccs	9750	gene						9304	9553	-	CC2R_00000827				ALOMY6G42914
CC2R	Resistant	m64023e_220409_165810_86641366_ccs	14100	gene						11880	12305	+	CC2R_00000283	PF00201	UDP-glucoronosyl and UDP-glucosyl transferase	sp|B3VI56|U91D2_STERE	ALOMY5G36967
CC2R	Resistant	m64023e_220409_165810_86771837_ccs	16230	gene						10272	10981	+	CC2R_00000163				ALOMY2G21695
CC2R	Resistant	m64023e_220409_165810_87097848_ccs0	7710	gene						7156	7356	-	CC2R_00001038
CC2R	Resistant	m64023e_220409_165810_87097848_ccs01	840	gene						237	401	-	CC2R_00001537
CC2R	Resistant	m64023e_220409_165810_87426850_ccs	12640	gene						8899	10278	+	CC2R_00000427				ALOMY7G37679
CC2R	Resistant	m64023e_220409_165810_87621846_ccs	5576	gene						3655	3816	+	CC2R_00001241
CC2R	Resistant	m64023e_220409_165810_87621846_ccs	5576	gene						5021	5155	-	CC2R_00001242				ALOMY3G11071
CC2R	Resistant	m64023e_220409_165810_87820306_ccs	16280	gene						675	3715	+	CC2R_00000160	PF04195	Putative gypsy type transposon		ALOMY2G20844
CC2R	Resistant	m64023e_220409_165810_88344253_ccs	17910	gene						15081	16772	-	CC2R_00000089				ALOMY5G31919
CC2R	Resistant	m64023e_220409_165810_8848836_ccs	9707	gene						5035	5121	+	CC2R_00000834
CC2R	Resistant	m64023e_220409_165810_88607452_ccs	11580	gene						2299	2612	-	CC2R_00000572				ALOMY6G42914
CC2R	Resistant	m64023e_220409_165810_89459337_ccs	6809	gene						2113	3835	-	CC2R_00001145	PF00650	CRAL/TRIO domain	sp|Q55CU8|PITC_DICDI	ALOMY1G07234
CC2R	Resistant	m64023e_220409_165810_89524025_ccs	9177	gene						2194	4255	-	CC2R_00000883	PF00630	Filamin/ABP280 repeat	sp|P13466|GELA_DICDI	ALOMY2G24476
CC2R	Resistant	m64023e_220409_165810_89524754_ccs	13537	gene						5333	8573	-	CC2R_00000321	PF04195	Putative gypsy type transposon		ALOMY1G05155
CC2R	Resistant	m64023e_220409_165810_89721107_ccs	12023	gene						1138	5630	+	CC2R_00000521	PF00006	ATP synthase alpha/beta family, nucleotide-binding domain	sp|A1EA05|ATPA_AGRST	ALOMY0G46724
CC2R	Resistant	m64023e_220409_165810_89721107_ccs	12023	gene						7313	7726	-	CC2R_00000522	PF00223	Photosystem I psaA/psaB protein	sp|A0A334|PSAB_COFAR	ALOMY1G05139
CC2R	Resistant	m64023e_220409_165810_89721107_ccs	12023	gene						8020	10330	-	CC2R_00000523	PF00223	Photosystem I psaA/psaB protein	sp|P58311|PSAA_WHEAT	ALOMY0G46726
CC2R	Resistant	m64023e_220409_165810_89721107_ccs	12023	gene						10920	12022	-	CC2R_00000524			sp|P58257|YCF3_WHEAT	ALOMY0G46727
CC2R	Resistant	m64023e_220409_165810_89785208_ccs	22213	gene						254	5565	+	CC2R_00000018	PF00346	Respiratory-chain NADH dehydrogenase, 49 Kd subunit	sp|P0C337|NDHH_ORYSJ	ALOMY0G47042
CC2R	Resistant	m64023e_220409_165810_89785208_ccs	22213	gene						6093	7457	+	CC2R_00000019	PF00361	Proton-conducting membrane transporter	sp|P58420|NU4C_WHEAT	ALOMY0G47050
CC2R	Resistant	m64023e_220409_165810_89785208_ccs	22213	gene						7633	14380	-	CC2R_00000020	PF01578	Cytochrome C assembly protein	sp|A1EA58|CCSA_AGRST	ALOMY0G47049
CC2R	Resistant	m64023e_220409_165810_8979072_ccs	8760	gene						767	835	-	CC2R_00000922
CC2R	Resistant	m64023e_220409_165810_8979072_ccs	8760	gene						6276	6734	-	CC2R_00000923
CC2R	Resistant	m64023e_220409_165810_8979072_ccs	8760	gene						7041	7235	+	CC2R_00000924				ALOMY1G04497
CC2R	Resistant	m64023e_220409_165810_89851481_ccs	14011	gene						7509	10276	-	CC2R_00000288				ALOMY2G20844
CC2R	Resistant	m64023e_220409_165810_89916572_ccs	4980	gene						20	4397	-	CC2R_00001284				ALOMY2G20844
CC2R	Resistant	m64023e_220409_165810_89916572_ccs	4980	gene						4423	4771	-	CC2R_00001285				ALOMY2G20844
CC2R	Resistant	m64023e_220409_165810_90112485_ccs0	4920	gene						220	3027	-	CC2R_00001296				ALOMY5G32141
CC2R	Resistant	m64023e_220409_165810_90244590_ccs	9712	gene						2892	3005	-	CC2R_00000833				ALOMY4G30405
CC2R	Resistant	m64023e_220409_165810_90310253_ccs0	5670	gene						1366	2051	-	CC2R_00001232				ALOMY4G25999
CC2R	Resistant	m64023e_220409_165810_90310253_ccs0	5670	gene						2617	2721	+	CC2R_00001233				ALOMY0G48654
CC2R	Resistant	m64023e_220409_165810_9045740_ccs	10200	gene						164	922	-	CC2R_00000755	PF13920	Zinc finger, C3HC4 type (RING finger)	sp|Q09463|RNF5_CAEEL	ALOMY2G20540
CC2R	Resistant	m64023e_220409_165810_90571805_ccs	5492	gene						1101	1667	-	CC2R_00001246	PF00240	Ubiquitin family	sp|P0C030|RUB1_ORYSJ	ALOMY5G34357
CC2R	Resistant	m64023e_220409_165810_90571805_ccs	5492	gene						3488	3868	+	CC2R_00001247
CC2R	Resistant	m64023e_220409_165810_90702064_ccs	5040	gene						2630	4402	-	CC2R_00001278				ALOMY5G32141
CC2R	Resistant	m64023e_220409_165810_90768780_ccs	4638	gene						410	3021	-	CC2R_00001320				ALOMY2G20844
CC2R	Resistant	m64023e_220409_165810_90898471_ccs	3595	gene						873	1352	-	CC2R_00001414				ALOMY4G30490
CC2R	Resistant	m64023e_220409_165810_91095266_ccs	7170	gene						164	3586	-	CC2R_00001102	PF04195	Putative gypsy type transposon		ALOMY1G05155
CC2R	Resistant	m64023e_220409_165810_91620087_ccs	18240	gene						14866	18227	-	CC2R_00000080	PF00082	Subtilase family	sp|Q9ZSB0|SBT39_ARATH	ALOMY1G01348
CC2R	Resistant	m64023e_220409_165810_92146157_ccs	4056	gene						302	3293	+	CC2R_00001376	PF03108	MuDR family transposase		ALOMY3G14861
CC2R	Resistant	m64023e_220409_165810_9243036_ccs	12295	gene						1030	1830	-	CC2R_00000476	PF00016	Ribulose bisphosphate carboxylase large chain, catalytic domain	sp|A8Y9H8|RBL_LOLPR	ALOMY6G46021
CC2R	Resistant	m64023e_220409_165810_9243036_ccs	12295	gene						3264	4755	+	CC2R_00000477	PF00006	ATP synthase alpha/beta family, nucleotide-binding domain	sp|A1EA15|ATPB_AGRST	ALOMY0G46729
CC2R	Resistant	m64023e_220409_165810_9243036_ccs	12295	gene						7636	8735	+	CC2R_00000478	PF00329	Respiratory-chain NADH dehydrogenase, 30 Kd subunit	sp|Q95H60|NDHJ_WHEAT	ALOMY3G14315
CC2R	Resistant	m64023e_220409_165810_9243036_ccs	12295	gene						11538	12080	+	CC2R_00000479	PF01479	S4 domain	sp|P69645|RR4_LAMAU	ALOMY0G46728
CC2R	Resistant	m64023e_220409_165810_92539618_ccs	21310	gene						4411	7343	-	CC2R_00000022				ALOMY5G32141
CC2R	Resistant	m64023e_220409_165810_92539618_ccs	21310	gene						19762	21248	-	CC2R_00000023				ALOMY7G39957
CC2R	Resistant	m64023e_220409_165810_92605147_ccs	13890	gene						3759	3818	-	CC2R_00000294
CC2R	Resistant	m64023e_220409_165810_92670732_ccs	12731	gene						7840	8343	+	CC2R_00000419				ALOMY5G31918
CC2R	Resistant	m64023e_220409_165810_92735097_ccs	19849	gene						10407	10697	-	CC2R_00000049				ALOMY2G20844
CC2R	Resistant	m64023e_220409_165810_92735097_ccs	19849	gene						12493	13389	-	CC2R_00000050	PF04195	Putative gypsy type transposon		ALOMY2G20844
CC2R	Resistant	m64023e_220409_165810_93063546_ccs	8910	gene						1875	5376	+	CC2R_00000912				ALOMY5G32141
CC2R	Resistant	m64023e_220409_165810_9307081_ccs	3063	gene						1270	1455	+	CC2R_00001446				ALOMY2G23577
CC2R	Resistant	m64023e_220409_165810_93127954_ccs0	3840	gene						349	1189	+	CC2R_00001399				ALOMY3G15381
CC2R	Resistant	m64023e_220409_165810_93259989_ccs	10530	gene						53	2505	-	CC2R_00000726	PF04195	Putative gypsy type transposon		ALOMY1G05155
CC2R	Resistant	m64023e_220409_165810_93323528_ccs	7823	gene						236	4468	-	CC2R_00001030			sp|F4KDF5|MUPS1_ARATH	ALOMY1G05482
CC2R	Resistant	m64023e_220409_165810_94241618_ccs	9259	gene						8715	9223	-	CC2R_00000879				ALOMY5G35929
CC2R	Resistant	m64023e_220409_165810_94505496_ccs	19415	gene						2412	5382	+	CC2R_00000059				ALOMY5G32141
CC2R	Resistant	m64023e_220409_165810_94570044_ccs01	2980	gene						2118	2639	+	CC2R_00001450				ALOMY1G05255
CC2R	Resistant	m64023e_220409_165810_95028308_ccs	10050	gene						1759	2334	-	CC2R_00000781				ALOMY6G43490
CC2R	Resistant	m64023e_220409_165810_95291313_ccs	19611	gene						10494	13210	-	CC2R_00000053				ALOMY5G32354
CC2R	Resistant	m64023e_220409_165810_95356185_ccs	16050	gene						616	3967	+	CC2R_00000172	PF00562	RNA polymerase Rpb2, domain 6	sp|A1E9Z8|RPOB_AGRST	ALOMY3G16310
CC2R	Resistant	m64023e_220409_165810_95356185_ccs	16050	gene						3991	5280	+	CC2R_00000173	PF00623	RNA polymerase Rpb1, domain 2	sp|A8Y9G1|RPOC1_LOLPR	ALOMY1G02759
CC2R	Resistant	m64023e_220409_165810_95356185_ccs	16050	gene						7877	8249	+	CC2R_00000174
CC2R	Resistant	m64023e_220409_165810_95356185_ccs	16050	gene						10771	12474	-	CC2R_00000175	PF00318	Ribosomal protein S2	sp|A1EA02|ATPI_AGRST	ALOMY0G46723
CC2R	Resistant	m64023e_220409_165810_95423251_ccs	17910	gene						14860	17141	+	CC2R_00000090	PF04195	Putative gypsy type transposon		ALOMY2G20844
CC2R	Resistant	m64023e_220409_165810_95487116_ccs	7110	gene						4174	4368	+	CC2R_00001110				ALOMY7G37816
CC2R	Resistant	m64023e_220409_165810_95684814_ccs	11997	gene						9011	9358	+	CC2R_00000526				ALOMY5G31918
CC2R	Resistant	m64023e_220409_165810_95749830_ccs	12480	gene						5441	6121	+	CC2R_00000450				ALOMY1G04759
CC2R	Resistant	m64023e_220409_165810_95749830_ccs	12480	gene						10814	11434	+	CC2R_00000451				ALOMY4G29304
CC2R	Resistant	m64023e_220409_165810_95881246_ccs	12435	gene						9196	12131	-	CC2R_00000456				ALOMY5G32141
CC2R	Resistant	m64023e_220409_165810_96078650_ccs	10215	gene						6033	8899	+	CC2R_00000750				ALOMY7G39957
CC2R	Resistant	m64023e_220409_165810_96471085_ccs	6720	gene						5701	6387	+	CC2R_00001158	PF11321	Protein of unknown function (DUF3123)		ALOMY4G29570
CC2R	Resistant	m64023e_220409_165810_96471286_ccs	10608	gene						4281	4529	-	CC2R_00000710				ALOMY6G42914
CC2R	Resistant	m64023e_220409_165810_96536009_ccs	25164	gene						194	3296	-	CC2R_00000007	PF00237	Ribosomal protein L22p/L17e	sp|A1E9N0|RK22_HORVU	ALOMY0G46680
CC2R	Resistant	m64023e_220409_165810_96536009_ccs	25164	gene						4497	7400	+	CC2R_00000008			sp|A1XGT0|YCF2_RANMC	ALOMY7G37953
CC2R	Resistant	m64023e_220409_165810_96536009_ccs	25164	gene						8068	9644	-	CC2R_00000009	PF00361	Proton-conducting membrane transporter	sp|P0CD03|NU2C2_NUPAD	ALOMY6G44069
CC2R	Resistant	m64023e_220409_165810_96536009_ccs	25164	gene						9665	11081	-	CC2R_00000010	PF00177	Ribosomal protein S7p/S5e	sp|P0CC87|NU2C2_LOLPR	ALOMY6G44070
CC2R	Resistant	m64023e_220409_165810_96536009_ccs	25164	gene						11693	13361	-	CC2R_00000011	PF00164	Ribosomal protein S12/S23	sp|A4GYN8|RR12B_POPTR	ALOMY2G21331
CC2R	Resistant	m64023e_220409_165810_96536009_ccs	25164	gene						22390	24646	+	CC2R_00000012	PF00346	Respiratory-chain NADH dehydrogenase, 49 Kd subunit	sp|P0C337|NDHH_ORYSJ	ALOMY0G47042
CC2R	Resistant	m64023e_220409_165810_96537000_ccs0	1830	gene						861	1067	+	CC2R_00001521				ALOMY5G33003
CC2R	Resistant	m64023e_220409_165810_96537000_ccs01	1830	gene						608	814	+	CC2R_00001519				ALOMY5G33003
CC2R	Resistant	m64023e_220409_165810_96928993_ccs	10043	gene						9095	9344	-	CC2R_00000784				ALOMY6G42914
CC2R	Resistant	m64023e_220409_165810_96995050_ccs	2918	gene						1687	1935	-	CC2R_00001452				ALOMY6G42914
CC2R	Resistant	m64023e_220409_165810_97192632_ccs	1830	gene						42	1058	+	CC2R_00001520	PF14111	Domain of unknown function (DUF4283)	sp|O04244|Y4200_ARATH	ALOMY1G00149
CC2R	Resistant	m64023e_220409_165810_97517841_ccs01	8497	gene						833	1848	+	CC2R_00000948	PF02458	Transferase family	sp|Q0DKA5|AT7_ORYSJ	ALOMY5G35425
CC2R	Resistant	m64023e_220409_165810_97517841_ccs01	8497	gene						4240	4425	+	CC2R_00000949	PF01988	VIT family	sp|Q7XTL7|VITH5_ORYSJ	ALOMY0G48496
CC2R	Resistant	m64023e_220409_165810_97650942_ccs	13290	gene						8792	9052	-	CC2R_00000346	PF02326	Plant ATP synthase F0	sp|P43650|YMF19_WHEAT	ALOMY1G01058
CC2R	Resistant	m64023e_220409_165810_97714860_ccs	14040	gene						637	3823	-	CC2R_00000287				ALOMY1G05155
CC2R	Resistant	m64023e_220409_165810_97715945_ccs	9090	gene						3185	3646	-	CC2R_00000889	PF06449	Mitochondrial domain of unknown function (DUF1082)	sp|P43650|YMF19_WHEAT	ALOMY0G47545
CC2R	Resistant	m64023e_220409_165810_98043911_ccs	11805	gene						8790	8975	+	CC2R_00000538				ALOMY6G42914
CC2R	Resistant	m64023e_220409_165810_98239356_ccs	10581	gene						528	2063	+	CC2R_00000712				ALOMY1G02265
CC2R	Resistant	m64023e_220409_165810_98239356_ccs	10581	gene						6380	8080	+	CC2R_00000713				ALOMY1G02264
CC2R	Resistant	m64023e_220409_165810_98239356_ccs	10581	gene						9513	10547	+	CC2R_00000714	PF00931	NB-ARC domain	sp|Q38834|R13L4_ARATH	ALOMY1G02266
CC2R	Resistant	m64023e_220409_165810_98304763_ccs	1989	gene						716	1756	+	CC2R_00001512	PF12274	Protein of unknown function (DUF3615)		ALOMY6G44375
CC2R	Resistant	m64023e_220409_165810_9831889_ccs	6720	gene						3306	3500	+	CC2R_00001155				ALOMY2G23114
CC2R	Resistant	m64023e_220409_165810_9831889_ccs	6720	gene						5923	6184	-	CC2R_00001156				ALOMY2G23114
CC2R	Resistant	m64023e_220409_165810_98372336_ccs	6851	gene						5553	5762	+	CC2R_00001142
CC2R	Resistant	m64023e_220409_165810_98501873_ccs	8160	gene						5374	6075	-	CC2R_00000985				ALOMY4G25999
CC2R	Resistant	m64023e_220409_165810_98501873_ccs	8160	gene						6596	7674	-	CC2R_00000986				ALOMY4G26904
CC2R	Resistant	m64023e_220409_165810_985080_ccs	6510	gene						4745	5626	+	CC2R_00001171	PF13855	Leucine rich repeat	sp|Q7FZR1|RLP52_ARATH	ALOMY5G32589
CC2R	Resistant	m64023e_220409_165810_98568318_ccs	12800	gene						3241	3896	-	CC2R_00000411				ALOMY2G24538
CC2R	Resistant	m64023e_220409_165810_98568318_ccs	12800	gene						3923	4795	-	CC2R_00000412
CC2R	Resistant	m64023e_220409_165810_98568835_ccs0	5310	gene						368	622	+	CC2R_00001266				ALOMY5G33223
CC2R	Resistant	m64023e_220409_165810_98896676_ccs	3866	gene						1238	2381	+	CC2R_00001396	PF00230	Major intrinsic protein	sp|Q9FWV6|TIP31_ORYSJ	ALOMY5G34709
CC2R	Resistant	m64023e_220409_165810_99024947_ccs01	3314	gene						2287	3244	-	CC2R_00001428	PF03080	Neprosin		ALOMY1G09081
CC2R	Resistant	m64023e_220409_165810_99288892_ccs	8908	gene						980	5999	+	CC2R_00000914	PF00076	RNA recognition motif. (a.k.a. RRM, RBD, or RNP domain)	sp|Q84TH4|SR45A_ARATH	ALOMY3G15031
CC2R	Resistant	m64023e_220409_165810_99289647_ccs	13893	gene						1477	8345	+	CC2R_00000291	PF04195	Putative gypsy type transposon		ALOMY1G05155
CC2R	Resistant	m64023e_220409_165810_99289647_ccs	13893	gene						8370	10599	+	CC2R_00000292				ALOMY1G05155
CC2R	Resistant	m64023e_220409_165810_99289647_ccs	13893	gene						10608	10856	+	CC2R_00000293				ALOMY1G06605
CC2R	Resistant	m64023e_220409_165810_99354157_ccs	18750	gene						54	515	-	CC2R_00000065				ALOMY2G23598
CC2R	Resistant	m64023e_220409_165810_99354157_ccs	18750	gene						3562	4467	+	CC2R_00000066				ALOMY3G14615
CC2R	Resistant	m64023e_220409_165810_99484178_ccs	10848	gene						6485	9454	+	CC2R_00000672				ALOMY5G32354
CC2R	Resistant	m64023e_220409_165810_99614892_ccs	7973	gene						187	1398	+	CC2R_00001011			sp|Q9LK22|PUX1_ARATH	ALOMY2G19849
CC2R	Resistant	m64023e_220409_165810_99615206_ccs0	4440	gene						43	1810	-	CC2R_00001335				ALOMY5G32141
CC2R	Resistant	m64023e_220409_165810_99617477_ccs	19980	gene						16483	19420	-	CC2R_00000048				ALOMY2G20844
CC2R	Resistant	m64023e_220409_165810_99945208_ccs	12330	gene						9092	11752	+	CC2R_00000469	PF02330	Mitochondrial glycoprotein	sp|Q8W487|YB95_ARATH	ALOMY3G11022
CC2R	Resistant	m64023e_220409_165810_106301869_ccs0	4199	tRNA	1	2163	2086	Arg	ACG
CC2R	Resistant	m64023e_220409_165810_106301869_ccs01	4200	tRNA	1	92	15	Arg	ACG
CC2R	Resistant	m64023e_220409_165810_109184631_ccs	4207	tRNA	1	2370	2449	Leu	TAG
CC2R	Resistant	m64023e_220409_165810_122488771_ccs	13464	tRNA	1	5920	5994	Pro	TGG
CC2R	Resistant	m64023e_220409_165810_122488771_ccs	13464	tRNA	2	11411	11338	Met	CAT
CC2R	Resistant	m64023e_220409_165810_130089727_ccs	3090	tRNA	1	1919	1998	Leu	TAG
CC2R	Resistant	m64023e_220409_165810_136511640_ccs01	2190	tRNA	1	396	467	Arg	TCT
CC2R	Resistant	m64023e_220409_165810_143788359_ccs	10108	tRNA	1	5180	5251	Met	CAT
CC2R	Resistant	m64023e_220409_165810_1444241_ccs	12123	tRNA	1	2717	2638	Leu	TAG
CC2R	Resistant	m64023e_220409_165810_147259900_ccs	4830	tRNA	1	1508	1579	Undet	NNN
CC2R	Resistant	m64023e_220409_165810_149096609_ccs	4840	tRNA	1	59	130	Gln	TTG
CC2R	Resistant	m64023e_220409_165810_149096609_ccs	4840	tRNA	2	3670	3757	Ser	GCT
CC2R	Resistant	m64023e_220409_165810_154667638_ccs0	2400	tRNA	1	2192	2119	Cys	GCA
CC2R	Resistant	m64023e_220409_165810_154667638_ccs01	1424	tRNA	1	735	662	Cys	GCA
CC2R	Resistant	m64023e_220409_165810_154927616_ccs	7080	tRNA	1	5213	5127	Ser	GGA
CC2R	Resistant	m64023e_220409_165810_158992112_ccs0	1410	tRNA	3	296	213	Tyr	GTA
CC2R	Resistant	m64023e_220409_165810_158992112_ccs0	1410	tRNA	2	430	358	Glu	TTC
CC2R	Resistant	m64023e_220409_165810_158992112_ccs0	1410	tRNA	1	1243	1170	Asp	GTC
CC2R	Resistant	m64023e_220409_165810_15925341_ccs	17100	tRNA	1	1775	1854	Leu	TAG
CC2R	Resistant	m64023e_220409_165810_159450815_ccs	1080	tRNA	1	575	655	Leu	CAA
CC2R	Resistant	m64023e_220409_165810_15992489_ccs	12098	tRNA	1	985	1064	Leu	TAG
CC2R	Resistant	m64023e_220409_165810_163514515_ccs	1680	tRNA	1	1630	1557	Met	CAT
CC2R	Resistant	m64023e_220409_165810_16845433_ccs	12509	tRNA	1	7949	7877	Met	CAT
CC2R	Resistant	m64023e_220409_165810_172033093_ccs	1560	tRNA	1	726	653	Met	CAT
CC2R	Resistant	m64023e_220409_165810_22349055_ccs	11638	tRNA	1	3899	3820	Leu	TAG
CC2R	Resistant	m64023e_220409_165810_24446628_ccs	10425	tRNA	1	5205	5126	Leu	TAG
CC2R	Resistant	m64023e_220409_165810_30476719_ccs	12084	tRNA	5	7534	7461	Asp	GTC
CC2R	Resistant	m64023e_220409_165810_30476719_ccs	12084	tRNA	4	7979	7896	Tyr	GTA
CC2R	Resistant	m64023e_220409_165810_30476719_ccs	12084	tRNA	3	8112	8040	Glu	TTC
CC2R	Resistant	m64023e_220409_165810_30476719_ccs	12084	tRNA	2	8729	8658	Thr	GGT
CC2R	Resistant	m64023e_220409_165810_30476719_ccs	12084	tRNA	1	10846	10919	Met	CAT
CC2R	Resistant	m64023e_220409_165810_3475763_ccs	3967	tRNA	1	1636	1559	Arg	ACG
CC2R	Resistant	m64023e_220409_165810_38404714_ccs	4920	tRNA	1	2368	2441	Met	CAT
CC2R	Resistant	m64023e_220409_165810_38404714_ccs	4920	tRNA	2	4531	4458	His	GTG
CC2R	Resistant	m64023e_220409_165810_394186_ccs	6870	tRNA	1	5629	5558	Arg	TCT
CC2R	Resistant	m64023e_220409_165810_46728248_ccs	9420	tRNA	1	3642	3556	Ser	GGA
CC2R	Resistant	m64023e_220409_165810_46860310_ccs	12480	tRNA	1	4296	4365	Undet	NNN
CC2R	Resistant	m64023e_220409_165810_47056634_ccs	12593	tRNA	1	6690	6776	Ser	TGA
CC2R	Resistant	m64023e_220409_165810_52560334_ccs	12910	tRNA	1	2011	1932	Leu	TAG
CC2R	Resistant	m64023e_220409_165810_53085126_ccs	9780	tRNA	1	5965	6044	Leu	TAG
CC2R	Resistant	m64023e_220409_165810_55838013_ccs	20462	tRNA	1	14916	14989	His	GTG
CC2R	Resistant	m64023e_220409_165810_55838013_ccs	20462	tRNA	3	17081	17008	Met	CAT
CC2R	Resistant	m64023e_220409_165810_55838013_ccs	20462	tRNA	2	19379	19299	Leu	CAA
CC2R	Resistant	m64023e_220409_165810_59247192_ccs	4273	tRNA	1	1395	1475	Leu	CAA
CC2R	Resistant	m64023e_220409_165810_59835547_ccs	16740	tRNA	1	360	287	His	GTG
CC2R	Resistant	m64023e_220409_165810_60162745_ccs	12660	tRNA	1	2730	2659	Val	GAC
CC2R	Resistant	m64023e_220409_165810_60424629_ccs	13470	tRNA	1	8726	8805	Leu	TAG
CC2R	Resistant	m64023e_220409_165810_65341072_ccs	9540	tRNA	1	3428	3359	Undet	NNN
CC2R	Resistant	m64023e_220409_165810_65341150_ccs	5250	tRNA	1	3048	3121	Met	CAT
CC2R	Resistant	m64023e_220409_165810_66257639_ccs	11264	tRNA	1	1297	1370	Met	CAT
CC2R	Resistant	m64023e_220409_165810_66257639_ccs	11264	tRNA	2	2735	2822	Ser	TGA
CC2R	Resistant	m64023e_220409_165810_66257639_ccs	11264	tRNA	3	6389	6476	Ser	GCT
CC2R	Resistant	m64023e_220409_165810_66257639_ccs	11264	tRNA	4	7619	7690	Gln	TTG
CC2R	Resistant	m64023e_220409_165810_72614076_ccs	13770	tRNA	1	1482	1403	Leu	TAG
CC2R	Resistant	m64023e_220409_165810_74646294_ccs	14661	tRNA	1	4887	4964	Arg	ACG
CC2R	Resistant	m64023e_220409_165810_75368494_ccs	12330	tRNA	1	4554	4475	Leu	TAG
CC2R	Resistant	m64023e_220409_165810_75499755_ccs	11371	tRNA	1	3896	3817	Leu	TAG
CC2R	Resistant	m64023e_220409_165810_79955819_ccs	11640	tRNA	3	1521	1448	His	GTG
CC2R	Resistant	m64023e_220409_165810_79955819_ccs	11640	tRNA	2	8459	8388	Gln	TTG
CC2R	Resistant	m64023e_220409_165810_79955819_ccs	11640	tRNA	1	9689	9602	Ser	GCT
CC2R	Resistant	m64023e_220409_165810_80415543_ccs	7638	tRNA	1	6472	6543	Gln	TTG
CC2R	Resistant	m64023e_220409_165810_84215492_ccs	12973	tRNA	1	5947	5868	Leu	TAG
CC2R	Resistant	m64023e_220409_165810_86444598_ccs	2430	tRNA	1	1981	2053	Met	CAT
CC2R	Resistant	m64023e_220409_165810_89721107_ccs	12023	tRNA	1	4941	4870	Arg	TCT
CC2R	Resistant	m64023e_220409_165810_89785208_ccs	22213	tRNA	2	8692	8613	Leu	TAG
CC2R	Resistant	m64023e_220409_165810_89785208_ccs	22213	tRNA	1	15443	15366	Arg	ACG
CC2R	Resistant	m64023e_220409_165810_9243036_ccs	12295	tRNA	1	5359	5287	Met	CAT
CC2R	Resistant	m64023e_220409_165810_95748413_ccs	9060	tRNA	1	248	319	Thr	GGT
CC2R	Resistant	m64023e_220409_165810_95748413_ccs	9060	tRNA	2	864	936	Glu	TTC
CC2R	Resistant	m64023e_220409_165810_95748413_ccs	9060	tRNA	3	998	1081	Tyr	GTA
CC2R	Resistant	m64023e_220409_165810_95748413_ccs	9060	tRNA	4	1443	1516	Asp	GTC
CC2R	Resistant	m64023e_220409_165810_95748413_ccs	9060	tRNA	5	7184	7111	Met	CAT
CC2R	Resistant	m64023e_220409_165810_96536009_ccs	25164	tRNA	1	3031	3104	His	GTG
CC2R	Resistant	m64023e_220409_165810_96536009_ccs	25164	tRNA	5	5197	5123	Met	CAT
CC2R	Resistant	m64023e_220409_165810_96536009_ccs	25164	tRNA	4	7495	7416	Leu	CAA
CC2R	Resistant	m64023e_220409_165810_96536009_ccs	25164	tRNA	2	13599	13674	Val	GAC
CC2R	Resistant	m64023e_220409_165810_96536009_ccs	25164	tRNA	3	21327	21404	Arg	ACG
CC2R	Resistant	m64023e_220409_165810_97650942_ccs	13290	tRNA	1	9535	9462	Met	CAT
CC5R	Resistant	m64023e_220409_165810_100008609_ccs	13110	gene						5	184	-	CC5R_00000478			sp|A8Y9D7|NU4C_LOLPR	ALOMY0G47050
CC5R	Resistant	m64023e_220409_165810_100008609_ccs	13110	gene						709	2235	-	CC5R_00000479	PF00499	NADH-ubiquinone/plastoquinone oxidoreductase chain 6	sp|Q95H44|NU6C_WHEAT	ALOMY0G47051
CC5R	Resistant	m64023e_220409_165810_100008609_ccs	13110	gene						2497	5248	-	CC5R_00000480	PF00146	NADH dehydrogenase	sp|A1EA64|NU1C_AGRST	ALOMY0G47053
CC5R	Resistant	m64023e_220409_165810_100008609_ccs	13110	gene						5250	8802	-	CC5R_00000481	PF00346	Respiratory-chain NADH dehydrogenase, 49 Kd subunit	sp|A8Y9D4|NU5C_LOLPR	ALOMY0G47048
CC5R	Resistant	m64023e_220409_165810_100008609_ccs	13110	gene						6510	11763	+	CC5R_00000482	PF01578	Cytochrome C assembly protein	sp|A1EA58|CCSA_AGRST	ALOMY0G47049
CC5R	Resistant	m64023e_220409_165810_100008609_ccs	13110	gene						11913	12269	-	CC5R_00000483			sp|P58420|NU4C_WHEAT	ALOMY0G47050
CC5R	Resistant	m64023e_220409_165810_100008609_ccs	13110	gene						12277	13066	-	CC5R_00000484	PF00361	Proton-conducting membrane transporter	sp|P58420|NU4C_WHEAT	ALOMY0G47050
CC5R	Resistant	m64023e_220409_165810_100074784_ccs	8910	gene						269	518	+	CC5R_00001084				ALOMY6G42914
CC5R	Resistant	m64023e_220409_165810_100141065_ccs01	5592	gene						573	1078	-	CC5R_00001490				ALOMY1G08940
CC5R	Resistant	m64023e_220409_165810_100141590_ccs	17070	gene						102	5291	+	CC5R_00000168	PF00329	Respiratory-chain NADH dehydrogenase, 30 Kd subunit	sp|A8Y9H4|NDHK_LOLPR	ALOMY3G14315
CC5R	Resistant	m64023e_220409_165810_100141590_ccs	17070	gene						5652	6920	+	CC5R_00000169	PF01479	S4 domain	sp|P69646|RR4_LOLPR	ALOMY0G46728
CC5R	Resistant	m64023e_220409_165810_100141590_ccs	17070	gene						7844	8956	+	CC5R_00000170	PF00515	Tetratricopeptide repeat	sp|A8Y9H1|YCF3_LOLPR	ALOMY0G46727
CC5R	Resistant	m64023e_220409_165810_100141590_ccs	17070	gene						9547	11858	+	CC5R_00000171	PF00223	Photosystem I psaA/psaB protein	sp|P58311|PSAA_WHEAT	ALOMY0G46726
CC5R	Resistant	m64023e_220409_165810_100141590_ccs	17070	gene						11887	13097	+	CC5R_00000172	PF00223	Photosystem I psaA/psaB protein	sp|A1EA07|PSAB_AGRST	ALOMY0G46725
CC5R	Resistant	m64023e_220409_165810_100141590_ccs	17070	gene						13460	14095	+	CC5R_00000173	PF02874	ATP synthase alpha/beta family, beta-barrel domain	sp|A1EA05|ATPA_AGRST	ALOMY0G46724
CC5R	Resistant	m64023e_220409_165810_100141590_ccs	17070	gene						14587	14985	+	CC5R_00000174	PF00306	ATP synthase alpha/beta chain, C terminal domain	sp|Q6L3A1|ATPA_SACHY	ALOMY0G46724
CC5R	Resistant	m64023e_220409_165810_100141590_ccs	17070	gene						15631	17012	-	CC5R_00000175	PF00223	Photosystem I psaA/psaB protein	sp|A1E9S3|PSAB_SORBI	ALOMY0G46725
CC5R	Resistant	m64023e_220409_165810_100336606_ccs	12660	gene						2642	3115	-	CC5R_00000552				ALOMY5G32141
CC5R	Resistant	m64023e_220409_165810_100336606_ccs	12660	gene						3163	4686	-	CC5R_00000553				ALOMY5G32141
CC5R	Resistant	m64023e_220409_165810_100336606_ccs	12660	gene						4754	5107	-	CC5R_00000554	PF04195	Putative gypsy type transposon		ALOMY1G05155
CC5R	Resistant	m64023e_220409_165810_100534493_ccs	14550	gene						12892	13945	-	CC5R_00000328				ALOMY4G29304
CC5R	Resistant	m64023e_220409_165810_100729424_ccs	13175	gene						999	2522	-	CC5R_00000460	PF00006	ATP synthase alpha/beta family, nucleotide-binding domain	sp|A8Y9G7|ATPA_LOLPR	ALOMY0G46724
CC5R	Resistant	m64023e_220409_165810_100729424_ccs	13175	gene						5039	6742	-	CC5R_00000461	PF00318	Ribosomal protein S2	sp|A1EA02|ATPI_AGRST	ALOMY0G46723
CC5R	Resistant	m64023e_220409_165810_100729424_ccs	13175	gene						11688	13122	-	CC5R_00000462	PF04997	RNA polymerase Rpb1, domain 1	sp|P0C506|RPOC1_ORYSJ	ALOMY1G02759
CC5R	Resistant	m64023e_220409_165810_10094974_ccs	3746	gene						901	2658	-	CC5R_00001679				ALOMY6G45949
CC5R	Resistant	m64023e_220409_165810_100992238_ccs	10680	gene						481	1076	-	CC5R_00000832				ALOMY1G07117
CC5R	Resistant	m64023e_220409_165810_100992238_ccs	10680	gene						521	979	+	CC5R_00000833				ALOMY5G31650
CC5R	Resistant	m64023e_220409_165810_100993222_ccs01	2670	gene						658	2139	+	CC5R_00001753	PF04427	Brix domain	sp|Q9ASU7|PPAN_ARATH	ALOMY6G43946
CC5R	Resistant	m64023e_220409_165810_101122647_ccs	9570	gene						237	9060	-	CC5R_00001002	PF01189	16S rRNA methyltransferase RsmB/F	sp|Q84MA1|NOP2C_ARATH	ALOMY7G38137
CC5R	Resistant	m64023e_220409_165810_101124268_ccs	18900	gene						6461	7733	-	CC5R_00000099	PF03874	RNA polymerase Rpb4		ALOMY3G11792
CC5R	Resistant	m64023e_220409_165810_101124268_ccs	18900	gene						17881	18402	-	CC5R_00000100				ALOMY5G35392
CC5R	Resistant	m64023e_220409_165810_101124268_ccs	18900	gene						18403	18615	-	CC5R_00000101				ALOMY2G19837
CC5R	Resistant	m64023e_220409_165810_101124326_ccs01	8033	gene						3722	4679	+	CC5R_00001200				ALOMY4G26194
CC5R	Resistant	m64023e_220409_165810_101450591_ccs	6810	gene						235	2193	+	CC5R_00001356				ALOMY2G24077
CC5R	Resistant	m64023e_220409_165810_101450591_ccs	6810	gene						4182	4562	-	CC5R_00001357				ALOMY1G06367
CC5R	Resistant	m64023e_220409_165810_101515400_ccs	9399	gene						4093	9240	+	CC5R_00001022				ALOMY5G32141
CC5R	Resistant	m64023e_220409_165810_101517022_ccs	6522	gene						3516	4034	+	CC5R_00001393				ALOMY4G26942
CC5R	Resistant	m64023e_220409_165810_101908663_ccs	16917	gene						14830	14958	-	CC5R_00000183
CC5R	Resistant	m64023e_220409_165810_101975438_ccs	6997	gene						539	1745	-	CC5R_00001338				ALOMY1G02012
CC5R	Resistant	m64023e_220409_165810_102172443_ccs	3870	gene						1382	3304	+	CC5R_00001668	PF00249	Myb-like DNA-binding domain	sp|Q9SPG3|MYB26_ARATH	ALOMY6G43371	TF
CC5R	Resistant	m64023e_220409_165810_102238021_ccs	20370	gene						3764	4613	+	CC5R_00000069				ALOMY5G32141
CC5R	Resistant	m64023e_220409_165810_102238021_ccs	20370	gene						4647	7391	+	CC5R_00000070				ALOMY5G32141
CC5R	Resistant	m64023e_220409_165810_102499368_ccs	5461	gene						612	1195	+	CC5R_00001500	PF00504	Chlorophyll A-B binding protein	sp|P14897|ELI9_HORVU	ALOMY7G38264
CC5R	Resistant	m64023e_220409_165810_102695432_ccs	22020	gene						1103	1315	+	CC5R_00000031	PF00146	NADH dehydrogenase	sp|A1EA64|NU1C_AGRST	ALOMY6G44543
CC5R	Resistant	m64023e_220409_165810_102695432_ccs	22020	gene						1413	1955	+	CC5R_00000032	PF13237	4Fe-4S dicluster domain	sp|A1EA63|NDHI_AGRST	ALOMY0G47052
CC5R	Resistant	m64023e_220409_165810_102695432_ccs	22020	gene						2217	3742	+	CC5R_00000033	PF00499	NADH-ubiquinone/plastoquinone oxidoreductase chain 6	sp|Q95H44|NU6C_WHEAT	ALOMY0G47051
CC5R	Resistant	m64023e_220409_165810_102695432_ccs	22020	gene						4266	5628	+	CC5R_00000034	PF00361	Proton-conducting membrane transporter	sp|P58420|NU4C_WHEAT	ALOMY0G47050
CC5R	Resistant	m64023e_220409_165810_102695432_ccs	22020	gene						5777	6706	-	CC5R_00000035	PF01578	Cytochrome C assembly protein	sp|A1EA58|CCSA_AGRST	ALOMY0G47049
CC5R	Resistant	m64023e_220409_165810_102695432_ccs	22020	gene						8737	12430	+	CC5R_00000036	PF00361	Proton-conducting membrane transporter	sp|A8Y9D4|NU5C_LOLPR	ALOMY0G47048
CC5R	Resistant	m64023e_220409_165810_102695432_ccs	22020	gene						20034	21719	+	CC5R_00000037	PF00346	Respiratory-chain NADH dehydrogenase, 49 Kd subunit	sp|A8Y9E3|NDHH_LOLPR	ALOMY0G47042
CC5R	Resistant	m64023e_220409_165810_102761526_ccs	11790	gene						8305	11242	-	CC5R_00000662	PF04195	Putative gypsy type transposon		ALOMY2G20844
CC5R	Resistant	m64023e_220409_165810_102761695_ccs	3117	gene						498	1682	+	CC5R_00001734				ALOMY2G19096
CC5R	Resistant	m64023e_220409_165810_103088186_ccs	15420	gene						8813	9866	+	CC5R_00000286				ALOMY4G29304
CC5R	Resistant	m64023e_220409_165810_103219402_ccs	5400	gene						2761	3090	-	CC5R_00001511				ALOMY2G18897
CC5R	Resistant	m64023e_220409_165810_103418449_ccs	5259	gene						2420	3756	+	CC5R_00001529	PF04195	Putative gypsy type transposon		ALOMY1G05155
CC5R	Resistant	m64023e_220409_165810_103418449_ccs	5259	gene						4200	5208	+	CC5R_00001530				ALOMY7G39957
CC5R	Resistant	m64023e_220409_165810_103481970_ccs	4901	gene						1370	4030	-	CC5R_00001581	PF00155	Aminotransferase class I and II	sp|Q9ST02|NAATA_HORVU	ALOMY3G13737
CC5R	Resistant	m64023e_220409_165810_10357265_ccs	7271	gene						2534	3160	-	CC5R_00001317				ALOMY2G22305
CC5R	Resistant	m64023e_220409_165810_103680341_ccs	8910	gene						7539	8045	-	CC5R_00001086				ALOMY3G14409
CC5R	Resistant	m64023e_220409_165810_103680690_ccs	2445	gene						386	781	-	CC5R_00001762
CC5R	Resistant	m64023e_220409_165810_103942977_ccs	5357	gene						2426	2739	-	CC5R_00001517				ALOMY6G42914
CC5R	Resistant	m64023e_220409_165810_104464969_ccs0	15570	gene						5660	8600	-	CC5R_00000280				ALOMY2G20844
CC5R	Resistant	m64023e_220409_165810_104531994_ccs	16344	gene						7734	10631	-	CC5R_00000227				ALOMY5G32141
CC5R	Resistant	m64023e_220409_165810_104596722_ccs	10470	gene						7852	8581	+	CC5R_00000873				ALOMY4G29304
CC5R	Resistant	m64023e_220409_165810_104661776_ccs	12921	gene						9806	10107	-	CC5R_00000532				ALOMY5G34136
CC5R	Resistant	m64023e_220409_165810_104728017_ccs	11190	gene						10367	11109	+	CC5R_00000758				ALOMY5G32399
CC5R	Resistant	m64023e_220409_165810_105449598_ccs	7980	gene						602	4961	-	CC5R_00001202				ALOMY5G32979
CC5R	Resistant	m64023e_220409_165810_105449598_ccs	7980	gene						6013	6513	+	CC5R_00001203				ALOMY1G09585
CC5R	Resistant	m64023e_220409_165810_105645386_ccs	10670	gene						8778	9542	-	CC5R_00000837				ALOMY2G19372
CC5R	Resistant	m64023e_220409_165810_105645386_ccs	10670	gene						9935	10261	-	CC5R_00000838				ALOMY2G19371
CC5R	Resistant	m64023e_220409_165810_105972744_ccs01	5010	gene						491	1231	+	CC5R_00001564				ALOMY2G23101
CC5R	Resistant	m64023e_220409_165810_10617981_ccs	6180	gene						1669	2223	-	CC5R_00001424				ALOMY2G20844
CC5R	Resistant	m64023e_220409_165810_10617981_ccs	6180	gene						2224	4826	-	CC5R_00001425				ALOMY2G20844
CC5R	Resistant	m64023e_220409_165810_106234162_ccs0	5850	gene						2061	2189	-	CC5R_00001460
CC5R	Resistant	m64023e_220409_165810_106234162_ccs0	5850	gene						2233	2550	-	CC5R_00001461				ALOMY2G22174
CC5R	Resistant	m64023e_220409_165810_106301896_ccs	8370	gene						155	1370	+	CC5R_00001159	PF00010	Helix-loop-helix DNA-binding domain	sp|Q10CH5|PIL13_ORYSJ	ALOMY3G11842	TF
CC5R	Resistant	m64023e_220409_165810_106628684_ccs	11122	gene						4354	7301	+	CC5R_00000775	PF04195	Putative gypsy type transposon		ALOMY2G20844
CC5R	Resistant	m64023e_220409_165810_106629470_ccs0	8760	gene						1592	3919	-	CC5R_00001115	PF00082	Subtilase family	sp|O65351|SBT17_ARATH	ALOMY7G39633
CC5R	Resistant	m64023e_220409_165810_107283891_ccs	9393	gene						5130	8627	+	CC5R_00001023				ALOMY1G05155
CC5R	Resistant	m64023e_220409_165810_107480800_ccs	11721	gene						4596	4856	+	CC5R_00000674				ALOMY6G42914
CC5R	Resistant	m64023e_220409_165810_107743213_ccs	9300	gene						635	3525	-	CC5R_00001029				ALOMY7G39957
CC5R	Resistant	m64023e_220409_165810_107743213_ccs	9300	gene						3537	4057	-	CC5R_00001030				ALOMY1G05155
CC5R	Resistant	m64023e_220409_165810_108464671_ccs	4455	gene						1217	2001	+	CC5R_00001633				ALOMY5G32665
CC5R	Resistant	m64023e_220409_165810_10879109_ccs	7664	gene						2266	2601	-	CC5R_00001255				ALOMY2G20844
CC5R	Resistant	m64023e_220409_165810_10879109_ccs	7664	gene						2647	3491	-	CC5R_00001256				ALOMY2G20844
CC5R	Resistant	m64023e_220409_165810_10879109_ccs	7664	gene						3618	4200	-	CC5R_00001257				ALOMY2G20844
CC5R	Resistant	m64023e_220409_165810_10879109_ccs	7664	gene						4202	4912	-	CC5R_00001258	PF04195	Putative gypsy type transposon		ALOMY2G20844
CC5R	Resistant	m64023e_220409_165810_108857257_ccs	11965	gene						2337	3449	-	CC5R_00000640				ALOMY1G06605
CC5R	Resistant	m64023e_220409_165810_108857257_ccs	11965	gene						3490	6161	-	CC5R_00000641				ALOMY1G05155
CC5R	Resistant	m64023e_220409_165810_108921288_ccs	4890	gene						717	2838	+	CC5R_00001582	PF00085	Thioredoxin	sp|P48384|TRXM_PEA	ALOMY3G17392
CC5R	Resistant	m64023e_220409_165810_109314693_ccs	2220	gene						61	2218	+	CC5R_00001771	PF00361	Proton-conducting membrane transporter	sp|P0CC87|NU2C2_LOLPR	ALOMY6G44070
CC5R	Resistant	m64023e_220409_165810_109382472_ccs	1718	gene						977	1689	+	CC5R_00001793			sp|P40619|HMGL_IPONI	ALOMY4G30576
CC5R	Resistant	m64023e_220409_165810_109446204_ccs	18597	gene						17463	17716	+	CC5R_00000112				ALOMY6G42914
CC5R	Resistant	m64023e_220409_165810_109510836_ccs01	10125	gene						3415	3603	-	CC5R_00000930				ALOMY1G10088
CC5R	Resistant	m64023e_220409_165810_109510836_ccs01	10125	gene						7036	7410	-	CC5R_00000931				ALOMY5G35878
CC5R	Resistant	m64023e_220409_165810_109510836_ccs01	10125	gene						8679	9717	+	CC5R_00000932	PF06839	GRF zinc finger		ALOMY3G10580
CC5R	Resistant	m64023e_220409_165810_109643104_ccs	13689	gene						786	1186	-	CC5R_00000393				ALOMY5G31919
CC5R	Resistant	m64023e_220409_165810_109643104_ccs	13689	gene						12517	13681	+	CC5R_00000394	PF01453	D-mannose binding lectin	sp|Q9ZVA2|EP1L2_ARATH	ALOMY1G07580
CC5R	Resistant	m64023e_220409_165810_109709098_ccs	14820	gene						2846	5409	+	CC5R_00000306				ALOMY5G32141
CC5R	Resistant	m64023e_220409_165810_109709098_ccs	14820	gene						5425	6406	+	CC5R_00000307				ALOMY5G32141
CC5R	Resistant	m64023e_220409_165810_109839097_ccs01	3126	gene						15	1036	-	CC5R_00001729	PF02392	Ycf4	sp|A8Y9I0|YCF4_LOLPR	ALOMY3G14791
CC5R	Resistant	m64023e_220409_165810_109839097_ccs01	3126	gene						1642	2334	-	CC5R_00001730	PF03040	CemA family	sp|A1EA20|CEMA_AGRST	ALOMY3G14792
CC5R	Resistant	m64023e_220409_165810_109839097_ccs01	3126	gene						2676	3068	-	CC5R_00001731	PF02392	Ycf4	sp|A8Y9I0|YCF4_LOLPR	ALOMY0G46730
CC5R	Resistant	m64023e_220409_165810_110035335_ccs	11310	gene						5836	6961	+	CC5R_00000724				ALOMY4G29304
CC5R	Resistant	m64023e_220409_165810_110167767_ccs	8863	gene						5211	5339	-	CC5R_00001098				ALOMY5G35104
CC5R	Resistant	m64023e_220409_165810_110232814_ccs	7560	gene						1293	2411	+	CC5R_00001277	PF00346	Respiratory-chain NADH dehydrogenase, 49 Kd subunit	sp|P0C337|NDHH_ORYSJ	ALOMY0G47042
CC5R	Resistant	m64023e_220409_165810_110232814_ccs	7560	gene						2413	4259	+	CC5R_00001278	PF00146	NADH dehydrogenase	sp|A1EA64|NU1C_AGRST	ALOMY0G47053
CC5R	Resistant	m64023e_220409_165810_110362936_ccs	11275	gene						4694	5014	+	CC5R_00000741				ALOMY2G20844
CC5R	Resistant	m64023e_220409_165810_110362936_ccs	11275	gene						5051	7768	+	CC5R_00000742				ALOMY2G20844
CC5R	Resistant	m64023e_220409_165810_110560869_ccs0	11670	gene						446	1153	-	CC5R_00000677				ALOMY2G20844
CC5R	Resistant	m64023e_220409_165810_110560869_ccs0	11670	gene						1187	2351	-	CC5R_00000678	PF04195	Putative gypsy type transposon		ALOMY2G20844
CC5R	Resistant	m64023e_220409_165810_110560869_ccs0	11670	gene						2418	2809	-	CC5R_00000679				ALOMY2G20844
CC5R	Resistant	m64023e_220409_165810_110560869_ccs01	14968	gene						4282	4944	+	CC5R_00000302				ALOMY5G32354
CC5R	Resistant	m64023e_220409_165810_110560869_ccs01	14968	gene						4969	5951	+	CC5R_00000303				ALOMY7G39957
CC5R	Resistant	m64023e_220409_165810_110560869_ccs01	14968	gene						6074	7488	+	CC5R_00000304				ALOMY5G32354
CC5R	Resistant	m64023e_220409_165810_110693147_ccs	7350	gene						173	5282	-	CC5R_00001308	PF00520	Ion transport protein	sp|O65717|CNGC1_ARATH	ALOMY6G42610
CC5R	Resistant	m64023e_220409_165810_110756864_ccs	11488	gene						15	1309	+	CC5R_00000692				ALOMY4G30779
CC5R	Resistant	m64023e_220409_165810_110756864_ccs	11488	gene						2792	8610	+	CC5R_00000693	PF00931	NB-ARC domain	sp|Q7XA39|RGA4_SOLBU	ALOMY4G30168
CC5R	Resistant	m64023e_220409_165810_110822478_ccs	9286	gene						3221	5069	+	CC5R_00001031	PF04195	Putative gypsy type transposon		ALOMY2G20844
CC5R	Resistant	m64023e_220409_165810_110822478_ccs	9286	gene						5486	6175	+	CC5R_00001032				ALOMY2G20844
CC5R	Resistant	m64023e_220409_165810_110887260_ccs	17176	gene						11258	11482	+	CC5R_00000164				ALOMY2G20844
CC5R	Resistant	m64023e_220409_165810_110887260_ccs	17176	gene						11896	14184	+	CC5R_00000165				ALOMY2G20844
CC5R	Resistant	m64023e_220409_165810_111084757_ccs	16470	gene						8573	11757	+	CC5R_00000215	PF04195	Putative gypsy type transposon		ALOMY1G05155
CC5R	Resistant	m64023e_220409_165810_111542698_ccs	12210	gene						831	3770	-	CC5R_00000600	PF04195	Putative gypsy type transposon		ALOMY2G20844
CC5R	Resistant	m64023e_220409_165810_1115791_ccs	13151	gene						1262	1768	+	CC5R_00000464				ALOMY5G32141
CC5R	Resistant	m64023e_220409_165810_1115791_ccs	13151	gene						1790	4196	+	CC5R_00000465				ALOMY5G32141
CC5R	Resistant	m64023e_220409_165810_112069120_ccs	7138	gene						5910	6092	+	CC5R_00001327				ALOMY7G40767
CC5R	Resistant	m64023e_220409_165810_112330052_ccs	10170	gene						1812	3181	-	CC5R_00000917				ALOMY4G30208
CC5R	Resistant	m64023e_220409_165810_112593656_ccs	8130	gene						5403	5798	+	CC5R_00001184				ALOMY7G38152
CC5R	Resistant	m64023e_220409_165810_112656642_ccs	2087	gene						104	745	-	CC5R_00001772				ALOMY0G47344
CC5R	Resistant	m64023e_220409_165810_112659013_ccs01	6210	gene						2052	2285	-	CC5R_00001420
CC5R	Resistant	m64023e_220409_165810_112723482_ccs	7749	gene						4985	5747	-	CC5R_00001244				ALOMY2G20534
CC5R	Resistant	m64023e_220409_165810_11274460_ccs	13936	gene						242	816	+	CC5R_00000377	PF00238	Ribosomal protein L14p/L23e	sp|P08529|RK14_MAIZE	ALOMY0G46734
CC5R	Resistant	m64023e_220409_165810_11274460_ccs	13936	gene						1367	3528	+	CC5R_00000378	PF00411	Ribosomal protein S11	sp|A1EA40|RPOA_AGRST	ALOMY0G46732
CC5R	Resistant	m64023e_220409_165810_11274460_ccs	13936	gene						9557	10207	+	CC5R_00000379	PF00574	Clp protease	sp|P0C314|CLPP_ORYSJ	ALOMY0G46731
CC5R	Resistant	m64023e_220409_165810_112788205_ccs	10313	gene						2127	8759	+	CC5R_00000899				ALOMY4G29304
CC5R	Resistant	m64023e_220409_165810_112984130_ccs	14550	gene						4205	10342	+	CC5R_00000329	PF00687	Ribosomal protein L1p/L10e family	sp|Q8UE05|RL1_AGRFC	ALOMY6G42594
CC5R	Resistant	m64023e_220409_165810_113182768_ccs	7328	gene						1105	2820	+	CC5R_00001309	PF03171	2OG-Fe(II) oxygenase superfamily	sp|Q84MB3|ACCH1_ARATH	ALOMY1G01123
CC5R	Resistant	m64023e_220409_165810_113312848_ccs	14940	gene						4805	5524	+	CC5R_00000305				ALOMY5G33182
CC5R	Resistant	m64023e_220409_165810_11339929_ccs	7003	gene						4918	5538	-	CC5R_00001337				ALOMY3G11870	TF
CC5R	Resistant	m64023e_220409_165810_11340452_ccs	3810	gene						2472	2918	-	CC5R_00001676
CC5R	Resistant	m64023e_220409_165810_113509499_ccs	9759	gene						8130	8399	+	CC5R_00000985				ALOMY6G42914
CC5R	Resistant	m64023e_220409_165810_113510182_ccs	10980	gene						8085	9033	+	CC5R_00000795				ALOMY2G24548
CC5R	Resistant	m64023e_220409_165810_113510271_ccs	3205	gene						624	3134	-	CC5R_00001725	PF02518	Histidine kinase-, DNA gyrase B-, and HSP90-like ATPase	sp|A1A698|OHK4_ORYSJ	ALOMY1G02860	TR
CC5R	Resistant	m64023e_220409_165810_113640619_ccs	1980	gene						7	651	-	CC5R_00001779	PF00361	Proton-conducting membrane transporter	sp|P0CC87|NU2C2_LOLPR	ALOMY0G46717
CC5R	Resistant	m64023e_220409_165810_113640619_ccs	1980	gene						655	1954	-	CC5R_00001780	PF00361	Proton-conducting membrane transporter	sp|P0CC65|NU2C2_GOSBA	ALOMY6G44069
CC5R	Resistant	m64023e_220409_165810_113773321_ccs	13218	gene						552	1604	+	CC5R_00000457				ALOMY4G29304
CC5R	Resistant	m64023e_220409_165810_113773321_ccs	13218	gene						11604	12199	-	CC5R_00000458	PF13456	Reverse transcriptase-like		ALOMY7G40979
CC5R	Resistant	m64023e_220409_165810_113838881_ccs	16740	gene						10757	12545	-	CC5R_00000197				ALOMY1G06605
CC5R	Resistant	m64023e_220409_165810_113838881_ccs	16740	gene						12758	14670	-	CC5R_00000198	PF04195	Putative gypsy type transposon		ALOMY1G05155
CC5R	Resistant	m64023e_220409_165810_113903623_ccs	5010	gene						103	213	+	CC5R_00001566				ALOMY2G18072
CC5R	Resistant	m64023e_220409_165810_113967827_ccs	10618	gene						4767	5057	+	CC5R_00000850			sp|Q5Z8T8|XYXT1_ORYSJ	ALOMY1G08149
CC5R	Resistant	m64023e_220409_165810_114231948_ccs	8070	gene						2166	3583	+	CC5R_00001191	PF14559	Tetratricopeptide repeat		ALOMY5G33490		CC5
CC5R	Resistant	m64023e_220409_165810_114427309_ccs	13714	gene						7267	10252	+	CC5R_00000391				ALOMY5G32141
CC5R	Resistant	m64023e_220409_165810_114625293_ccs	21341	gene						12723	13583	-	CC5R_00000052	PF07939	Protein of unknown function (DUF1685)		ALOMY1G03835
CC5R	Resistant	m64023e_220409_165810_114754638_ccs	14300	gene						6020	8971	-	CC5R_00000344	PF04195	Putative gypsy type transposon		ALOMY2G20844
CC5R	Resistant	m64023e_220409_165810_114819399_ccs	7800	gene						1792	2041	-	CC5R_00001234				ALOMY6G42914
CC5R	Resistant	m64023e_220409_165810_114819774_ccs	8294	gene						1565	2938	-	CC5R_00001167	PF03514	GRAS domain family	sp|Q9SLH3|RGA_ARATH	ALOMY5G31789	TF
CC5R	Resistant	m64023e_220409_165810_114885272_ccs0	4560	gene						289	2022	+	CC5R_00001622	PF00561	alpha/beta hydrolase fold	sp|Q59695|ACOC_PSEPU	ALOMY7G39033
CC5R	Resistant	m64023e_220409_165810_114885272_ccs01	4557	gene						2456	3995	+	CC5R_00001623	PF00561	alpha/beta hydrolase fold	sp|Q59695|ACOC_PSEPU	ALOMY7G39033
CC5R	Resistant	m64023e_220409_165810_115541340_ccs	10800	gene						55	1604	-	CC5R_00000816	PF04195	Putative gypsy type transposon		ALOMY2G20844
CC5R	Resistant	m64023e_220409_165810_115607109_ccs	7080	gene						4101	5837	+	CC5R_00001331	PF08068	DKCLD (NUC011) domain	sp|Q9LD90|CBF5_ARATH	ALOMY3G15896
CC5R	Resistant	m64023e_220409_165810_115802684_ccs	11218	gene						587	2307	+	CC5R_00000752	PF04195	Putative gypsy type transposon		ALOMY2G20844
CC5R	Resistant	m64023e_220409_165810_115802684_ccs	11218	gene						2422	3536	+	CC5R_00000753				ALOMY2G20844
CC5R	Resistant	m64023e_220409_165810_115934551_ccs	12007	gene						1168	4362	+	CC5R_00000635	PF04195	Putative gypsy type transposon		ALOMY1G05155
CC5R	Resistant	m64023e_220409_165810_11602448_ccs	2052	gene						658	1406	+	CC5R_00001775	PF00240	Ubiquitin family	sp|P51423|RL40_BRARP	ALOMY1G01628
CC5R	Resistant	m64023e_220409_165810_116261369_ccs	2790	gene						487	1134	-	CC5R_00001748	PF03059	Nicotianamine synthase protein	sp|Q9XFB6|NAS8_HORVU	ALOMY4G29503
CC5R	Resistant	m64023e_220409_165810_116459218_ccs	17550	gene						1331	6436	-	CC5R_00000130				ALOMY2G20844
CC5R	Resistant	m64023e_220409_165810_116721002_ccs	5300	gene						3321	3503	+	CC5R_00001522				ALOMY5G36867
CC5R	Resistant	m64023e_220409_165810_116982672_ccs	14793	gene						582	3540	+	CC5R_00000308	PF04195	Putative gypsy type transposon		ALOMY2G20844
CC5R	Resistant	m64023e_220409_165810_117049703_ccs	15090	gene						13333	14387	-	CC5R_00000297				ALOMY4G29304
CC5R	Resistant	m64023e_220409_165810_117245239_ccs	12180	gene						13	521	-	CC5R_00000609				ALOMY7G39957
CC5R	Resistant	m64023e_220409_165810_117245239_ccs	12180	gene						533	1145	-	CC5R_00000610				ALOMY7G39957
CC5R	Resistant	m64023e_220409_165810_117245239_ccs	12180	gene						1173	2554	-	CC5R_00000611	PF04195	Putative gypsy type transposon		ALOMY1G05155
CC5R	Resistant	m64023e_220409_165810_117245867_ccs	11540	gene						11107	11257	-	CC5R_00000690
CC5R	Resistant	m64023e_220409_165810_117309899_ccs	4372	gene						2900	4000	-	CC5R_00001643	PF00329	Respiratory-chain NADH dehydrogenase, 30 Kd subunit	sp|Q95H60|NDHJ_WHEAT	ALOMY3G14315
CC5R	Resistant	m64023e_220409_165810_117377660_ccs	10408	gene						9617	10033	-	CC5R_00000889				ALOMY4G29959
CC5R	Resistant	m64023e_220409_165810_117441260_ccs	11547	gene						8143	11073	+	CC5R_00000688	PF12937	F-box-like		ALOMY1G07988
CC5R	Resistant	m64023e_220409_165810_117441533_ccs	16440	gene						8236	11170	+	CC5R_00000216	PF04195	Putative gypsy type transposon		ALOMY2G20844
CC5R	Resistant	m64023e_220409_165810_117704209_ccs01	1939	gene						1086	1343	+	CC5R_00001785
CC5R	Resistant	m64023e_220409_165810_117899986_ccs	9546	gene						2547	2798	-	CC5R_00001008				ALOMY6G42914
CC5R	Resistant	m64023e_220409_165810_118098008_ccs	14481	gene						379	1458	+	CC5R_00000338				ALOMY4G29304
CC5R	Resistant	m64023e_220409_165810_118163899_ccs0	6180	gene						989	1939	+	CC5R_00001428	PF01612	3'-5' exonuclease		ALOMY4G30212
CC5R	Resistant	m64023e_220409_165810_118164181_ccs	4412	gene						3251	3307	+	CC5R_00001635
CC5R	Resistant	m64023e_220409_165810_118228474_ccs	10530	gene						107	3045	-	CC5R_00000855	PF04195	Putative gypsy type transposon		ALOMY2G20844
CC5R	Resistant	m64023e_220409_165810_118490595_ccs	13836	gene						10880	13816	+	CC5R_00000385	PF04195	Putative gypsy type transposon		ALOMY2G20844
CC5R	Resistant	m64023e_220409_165810_118819475_ccs	8123	gene						1131	3771	-	CC5R_00001186				ALOMY3G14503
CC5R	Resistant	m64023e_220409_165810_119343215_ccs	5910	gene						3698	4057	-	CC5R_00001456				ALOMY1G00865
CC5R	Resistant	m64023e_220409_165810_119343479_ccs	7080	gene						3267	3566	-	CC5R_00001329				ALOMY3G12635
CC5R	Resistant	m64023e_220409_165810_119343479_ccs	7080	gene						3737	4528	-	CC5R_00001330	PF00097	Zinc finger, C3HC4 type (RING finger)	sp|O64425|RMA1_ARATH	ALOMY3G12634
CC5R	Resistant	m64023e_220409_165810_119472853_ccs	6960	gene						2067	3070	-	CC5R_00001344	PF02902	Ulp1 protease family, C-terminal catalytic domain		ALOMY2G20587
CC5R	Resistant	m64023e_220409_165810_119472853_ccs	6960	gene						3125	4859	-	CC5R_00001345				ALOMY2G20587
CC5R	Resistant	m64023e_220409_165810_119472853_ccs	6960	gene						4908	5816	-	CC5R_00001346
CC5R	Resistant	m64023e_220409_165810_119538613_ccs	8222	gene						1393	1926	+	CC5R_00001176				ALOMY3G11865
CC5R	Resistant	m64023e_220409_165810_119538613_ccs	8222	gene						5336	5698	-	CC5R_00001177				ALOMY4G30232
CC5R	Resistant	m64023e_220409_165810_119734535_ccs	5280	gene						609	4664	-	CC5R_00001525	PF00016	Ribulose bisphosphate carboxylase large chain, catalytic domain	sp|A8Y9H8|RBL_LOLPR	ALOMY6G46021
CC5R	Resistant	m64023e_220409_165810_119735994_ccs	10151	gene						4115	4363	-	CC5R_00000920				ALOMY6G42914
CC5R	Resistant	m64023e_220409_165810_119800817_ccs001	3330	gene						138	836	+	CC5R_00001713	PF06839	GRF zinc finger		ALOMY5G32862
CC5R	Resistant	m64023e_220409_165810_119800817_ccs001	3330	gene						1264	2135	-	CC5R_00001714				ALOMY3G15691
CC5R	Resistant	m64023e_220409_165810_119800817_ccs010	3330	gene						2	626	-	CC5R_00001711				ALOMY6G45521
CC5R	Resistant	m64023e_220409_165810_119800817_ccs010	3330	gene						2034	2543	+	CC5R_00001712	PF06839	GRF zinc finger		ALOMY5G34457
CC5R	Resistant	m64023e_220409_165810_119800817_ccs0101	3330	gene						1202	1807	+	CC5R_00001709	PF06839	GRF zinc finger		ALOMY5G32862
CC5R	Resistant	m64023e_220409_165810_119800817_ccs0101	3330	gene						1605	3214	-	CC5R_00001710				ALOMY3G15691
CC5R	Resistant	m64023e_220409_165810_11993857_ccs	9241	gene						2031	3140	-	CC5R_00001040	PF00646	F-box domain	sp|A8MS20|FB350_ARATH	ALOMY5G36296
CC5R	Resistant	m64023e_220409_165810_11993857_ccs	9241	gene						5030	5842	-	CC5R_00001041				ALOMY5G36296
CC5R	Resistant	m64023e_220409_165810_11994283_ccs	17310	gene						38	1279	+	CC5R_00000145	PF00410	Ribosomal protein S8	sp|A8Y9C2|RR8_LOLPR	ALOMY1G08801
CC5R	Resistant	m64023e_220409_165810_11994283_ccs	17310	gene						1478	3646	+	CC5R_00000146	PF00411	Ribosomal protein S11	sp|A8Y9B8|RPOA_LOLPR	ALOMY0G46732
CC5R	Resistant	m64023e_220409_165810_11994283_ccs	17310	gene						9267	11132	-	CC5R_00000147	PF02419	PsbL protein	sp|Q9GE29|PSBL_AMBTC	ALOMY0G47274
CC5R	Resistant	m64023e_220409_165810_11994283_ccs	17310	gene						16805	17241	-	CC5R_00000148	PF00574	Clp protease	sp|P26567|CLPP_MAIZE	ALOMY0G46731
CC5R	Resistant	m64023e_220409_165810_11995746_ccs	13795	gene						6505	6841	-	CC5R_00000386	PF07983	X8 domain	sp|Q9FNQ2|PDCB1_ARATH	ALOMY1G07896
CC5R	Resistant	m64023e_220409_165810_119997940_ccs	8810	gene						3040	3522	-	CC5R_00001106				ALOMY5G33275
CC5R	Resistant	m64023e_220409_165810_120129145_ccs	1971	gene						1170	1947	-	CC5R_00001783			sp|A8Y9C7|RR19_LOLPR	ALOMY5G36843
CC5R	Resistant	m64023e_220409_165810_120130195_ccs	5385	gene						3353	5244	+	CC5R_00001513	PF01786	Alternative oxidase	sp|Q8W855|AOX1C_ORYSJ	ALOMY2G18412
CC5R	Resistant	m64023e_220409_165810_120325319_ccs	21180	gene						15964	16773	+	CC5R_00000054				ALOMY4G29304
CC5R	Resistant	m64023e_220409_165810_120326839_ccs	7590	gene						1894	5081	-	CC5R_00001273	PF00305	Lipoxygenase	sp|Q8GSM2|LOX23_HORVU	ALOMY4G28949
CC5R	Resistant	m64023e_220409_165810_120326839_ccs	7590	gene						5117	6048	-	CC5R_00001274	PF00305	Lipoxygenase	sp|Q8GSM2|LOX23_HORVU	ALOMY4G28949
CC5R	Resistant	m64023e_220409_165810_12059764_ccs	1785	gene						888	1657	-	CC5R_00001792	PF04101	Glycosyltransferase family 28 C-terminal domain	sp|Q5I0K7|ALG13_RAT	ALOMY5G35862
CC5R	Resistant	m64023e_220409_165810_120652361_ccs	7026	gene						4311	6036	-	CC5R_00001335	PF07526	Associated with HOX	sp|P48731|ATH1_ARATH	ALOMY4G28720	TF
CC5R	Resistant	m64023e_220409_165810_120717473_ccs	540	gene						38	454	+	CC5R_00001815				ALOMY3G10479
CC5R	Resistant	m64023e_220409_165810_121047165_ccs	11100	gene						1843	4213	-	CC5R_00000776				ALOMY2G20844
CC5R	Resistant	m64023e_220409_165810_121177411_ccs	9150	gene						594	4078	-	CC5R_00001053	PF04195	Putative gypsy type transposon		ALOMY1G05155
CC5R	Resistant	m64023e_220409_165810_121177411_ccs	9150	gene						5787	9032	+	CC5R_00001054				ALOMY3G16882
CC5R	Resistant	m64023e_220409_165810_121439125_ccs	16380	gene						284	6454	-	CC5R_00000217	PF01578	Cytochrome C assembly protein	sp|P58420|NU4C_WHEAT	ALOMY0G47050
CC5R	Resistant	m64023e_220409_165810_121439125_ccs	16380	gene						6979	8504	-	CC5R_00000218	PF00499	NADH-ubiquinone/plastoquinone oxidoreductase chain 6	sp|Q95H44|NU6C_WHEAT	ALOMY0G47051
CC5R	Resistant	m64023e_220409_165810_121439125_ccs	16380	gene						8766	9308	-	CC5R_00000219	PF13237	4Fe-4S dicluster domain	sp|A1EA63|NDHI_AGRST	ALOMY0G47052
CC5R	Resistant	m64023e_220409_165810_121439125_ccs	16380	gene						9406	11517	-	CC5R_00000220	PF00146	NADH dehydrogenase	sp|A1EA64|NU1C_AGRST	ALOMY0G47053
CC5R	Resistant	m64023e_220409_165810_121439125_ccs	16380	gene						11519	12637	-	CC5R_00000221	PF00346	Respiratory-chain NADH dehydrogenase, 49 Kd subunit	sp|P0C337|NDHH_ORYSJ	ALOMY0G47042
CC5R	Resistant	m64023e_220409_165810_121439353_ccs	10410	gene						15	1398	-	CC5R_00000885	PF04195	Putative gypsy type transposon		ALOMY2G20844
CC5R	Resistant	m64023e_220409_165810_12191362_ccs	5160	gene						3925	4236	-	CC5R_00001544				ALOMY7G41634
CC5R	Resistant	m64023e_220409_165810_12191362_ccs	5160	gene						4312	4743	-	CC5R_00001545				ALOMY7G41634
CC5R	Resistant	m64023e_220409_165810_12191899_ccs	11138	gene						72	2803	+	CC5R_00000768			sp|P15268|MOSA_MAIZE	ALOMY1G02449
CC5R	Resistant	m64023e_220409_165810_12191939_ccs	8876	gene						5434	6512	+	CC5R_00001096	PF00033	Cytochrome b/b6/petB	sp|P04165|CYB_MAIZE	ALOMY0G47345
CC5R	Resistant	m64023e_220409_165810_122094032_ccs	13087	gene						12597	12898	+	CC5R_00000498				ALOMY3G10405
CC5R	Resistant	m64023e_220409_165810_122225141_ccs0	4500	gene						3975	4178	+	CC5R_00001628
CC5R	Resistant	m64023e_220409_165810_122225141_ccs01	10232	gene						4174	4344	+	CC5R_00000910				ALOMY7G40258
CC5R	Resistant	m64023e_220409_165810_122225268_ccs	6030	gene						241	450	+	CC5R_00001445	PF10868	Cysteine-rich antifungal protein 2, defensin-like		ALOMY1G00237
CC5R	Resistant	m64023e_220409_165810_122225268_ccs	6030	gene						3299	3694	+	CC5R_00001446	PF10868	Cysteine-rich antifungal protein 2, defensin-like		ALOMY1G00237
CC5R	Resistant	m64023e_220409_165810_122356007_ccs	3030	gene						914	3028	+	CC5R_00001735				ALOMY5G34718
CC5R	Resistant	m64023e_220409_165810_122620045_ccs	12143	gene						8162	11246	+	CC5R_00000626	PF04195	Putative gypsy type transposon		ALOMY2G20844
CC5R	Resistant	m64023e_220409_165810_122684264_ccs0	11070	gene						4361	4789	+	CC5R_00000779				ALOMY5G35568
CC5R	Resistant	m64023e_220409_165810_122684946_ccs	8502	gene						6694	6954	+	CC5R_00001141
CC5R	Resistant	m64023e_220409_165810_122684946_ccs	8502	gene						7013	7231	+	CC5R_00001142	PF04195	Putative gypsy type transposon		ALOMY2G20844
CC5R	Resistant	m64023e_220409_165810_122684946_ccs	8502	gene						7352	7600	+	CC5R_00001143				ALOMY2G20844
CC5R	Resistant	m64023e_220409_165810_122684946_ccs	8502	gene						7606	8477	+	CC5R_00001144				ALOMY2G20844
CC5R	Resistant	m64023e_220409_165810_122882772_ccs	7770	gene						75	2831	-	CC5R_00001240	PF03101	FAR1 DNA-binding domain	sp|Q3EBQ3|FRS2_ARATH	ALOMY3G15226	TF
CC5R	Resistant	m64023e_220409_165810_123013802_ccs	3390	gene						295	1579	+	CC5R_00001702	PF00035	Double-stranded RNA binding motif	sp|B7E321|DRB5_ORYSJ	ALOMY7G40877
CC5R	Resistant	m64023e_220409_165810_12323097_ccs	11880	gene						6418	7472	+	CC5R_00000652				ALOMY4G29304
CC5R	Resistant	m64023e_220409_165810_123537532_ccs	11010	gene						8150	10113	+	CC5R_00000786				ALOMY4G25483
CC5R	Resistant	m64023e_220409_165810_123667972_ccs	10641	gene						534	734	+	CC5R_00000844				ALOMY2G20844
CC5R	Resistant	m64023e_220409_165810_123667972_ccs	10641	gene						953	2159	+	CC5R_00000845				ALOMY2G20844
CC5R	Resistant	m64023e_220409_165810_123667972_ccs	10641	gene						2361	3472	+	CC5R_00000846				ALOMY2G20844
CC5R	Resistant	m64023e_220409_165810_123734611_ccs	10500	gene						563	1352	-	CC5R_00000861	PF00361	Proton-conducting membrane transporter	sp|P0CD17|NU2C2_ORYNI	ALOMY6G44069
CC5R	Resistant	m64023e_220409_165810_123734611_ccs	10500	gene						1796	2656	-	CC5R_00000862	PF00410	Ribosomal protein S8	sp|A8Y9C2|RR8_LOLPR	ALOMY1G08801
CC5R	Resistant	m64023e_220409_165810_123734611_ccs	10500	gene						2775	2993	-	CC5R_00000863	PF00252	Ribosomal protein L16p/L10e	sp|B3TN87|RK16_BRADI	ALOMY1G08801
CC5R	Resistant	m64023e_220409_165810_123734611_ccs	10500	gene						4284	4970	-	CC5R_00000864	PF00189	Ribosomal protein S3, C-terminal domain	sp|A1E9W3|RR3_SORBI	ALOMY0G46735
CC5R	Resistant	m64023e_220409_165810_123734611_ccs	10500	gene						5043	6247	-	CC5R_00000865	PF00237	Ribosomal protein L22p/L17e	sp|A1E9N0|RK22_HORVU	ALOMY0G46680
CC5R	Resistant	m64023e_220409_165810_123734611_ccs	10500	gene						7197	9800	-	CC5R_00000866	PF00181	Ribosomal Proteins L2, RNA binding domain	sp|A8Y9C8|RK2_LOLPR	ALOMY2G21929
CC5R	Resistant	m64023e_220409_165810_123734611_ccs	10500	gene						8656	10353	+	CC5R_00000867			sp|Q37066|YCF73_ORYSJ	ALOMY7G37953
CC5R	Resistant	m64023e_220409_165810_123928878_ccs0	7890	gene						4513	5952	-	CC5R_00001210	PF03478	Protein of unknown function (DUF295)		ALOMY2G20404
CC5R	Resistant	m64023e_220409_165810_123930533_ccs	9780	gene						4098	4352	-	CC5R_00000975				ALOMY6G42914
CC5R	Resistant	m64023e_220409_165810_124061599_ccs	8910	gene						3121	3798	-	CC5R_00001088			sp|Q8LF20|CAP2_ARATH	ALOMY5G36480
CC5R	Resistant	m64023e_220409_165810_124061830_ccs	11239	gene						1059	1256	-	CC5R_00000748				ALOMY1G05240
CC5R	Resistant	m64023e_220409_165810_124191764_ccs	7432	gene						3	2787	-	CC5R_00001291	PF07889	Protein of unknown function (DUF1664)		ALOMY1G10103
CC5R	Resistant	m64023e_220409_165810_124323644_ccs	9475	gene						1881	5528	+	CC5R_00001016	PF03982	Diacylglycerol acyltransferase	sp|Q9ZVN2|Y1457_ARATH	ALOMY4G29806
CC5R	Resistant	m64023e_220409_165810_1245307_ccs	11884	gene						5289	5576	-	CC5R_00000643				ALOMY2G20844
CC5R	Resistant	m64023e_220409_165810_1245307_ccs	11884	gene						5601	8231	-	CC5R_00000644				ALOMY2G20844
CC5R	Resistant	m64023e_220409_165810_125109489_ccs	9660	gene						7397	7650	-	CC5R_00000994				ALOMY6G42914
CC5R	Resistant	m64023e_220409_165810_125307312_ccs	12300	gene						4992	6670	-	CC5R_00000591				ALOMY7G39382
CC5R	Resistant	m64023e_220409_165810_125436613_ccs	10677	gene						9780	10028	-	CC5R_00000835				ALOMY6G42914
CC5R	Resistant	m64023e_220409_165810_125503533_ccs	4411	gene						292	3361	-	CC5R_00001636				ALOMY5G34152
CC5R	Resistant	m64023e_220409_165810_125503744_ccs	12390	gene						13	1128	-	CC5R_00000581	PF01824	MatK/TrnK amino terminal region	sp|Q9MUY9|MATK_POAPR	ALOMY0G46721
CC5R	Resistant	m64023e_220409_165810_125503744_ccs	12390	gene						6575	8556	+	CC5R_00000582	PF00181	Ribosomal Proteins L2, RNA binding domain	sp|A8Y9C8|RK2_LOLPR	ALOMY0G47044
CC5R	Resistant	m64023e_220409_165810_125503744_ccs	12390	gene						9826	11377	-	CC5R_00000583	PF00124	Photosynthetic reaction centre protein	sp|P56318|PSBA_CHLVU	ALOMY0G46720
CC5R	Resistant	m64023e_220409_165810_125634499_ccs	11540	gene						813	1626	+	CC5R_00000689				ALOMY4G29304
CC5R	Resistant	m64023e_220409_165810_125829799_ccs	7077	gene						673	1881	+	CC5R_00001333	PF00646	F-box domain		ALOMY4G25778
CC5R	Resistant	m64023e_220409_165810_125831967_ccs	2670	gene						596	2669	-	CC5R_00001752	PF01593	Flavin containing amine oxidoreductase	sp|Q0DUI8|PDS_ORYSJ	ALOMY6G45297
CC5R	Resistant	m64023e_220409_165810_12584915_ccs	19320	gene						7471	10317	-	CC5R_00000090	PF01747	ATP-sulfurylase	sp|Q9S7D8|APS4_ARATH	ALOMY1G02545		CC2
CC5R	Resistant	m64023e_220409_165810_126158081_ccs01	8641	gene						1237	8409	+	CC5R_00001128	PF07762	Protein of unknown function (DUF1618)		ALOMY2G22662
CC5R	Resistant	m64023e_220409_165810_126288495_ccs	10989	gene						1874	3805	-	CC5R_00000794	PF00069	Protein kinase domain	sp|Q9ZUP4|CKL5_ARATH	ALOMY1G02275
CC5R	Resistant	m64023e_220409_165810_126616294_ccs	13320	gene						679	3288	-	CC5R_00000443	PF00223	Photosystem I psaA/psaB protein	sp|A1EA07|PSAB_AGRST	ALOMY0G46725
CC5R	Resistant	m64023e_220409_165810_126616294_ccs	13320	gene						3314	5060	-	CC5R_00000444	PF00223	Photosystem I psaA/psaB protein	sp|P58311|PSAA_WHEAT	ALOMY0G46726
CC5R	Resistant	m64023e_220409_165810_126616294_ccs	13320	gene						5116	5631	-	CC5R_00000445	PF00223	Photosystem I psaA/psaB protein	sp|A1EA08|PSAA_AGRST	ALOMY0G46726
CC5R	Resistant	m64023e_220409_165810_126616294_ccs	13320	gene						6222	7332	-	CC5R_00000446	PF00515	Tetratricopeptide repeat	sp|A8Y9H1|YCF3_LOLPR	ALOMY0G46727
CC5R	Resistant	m64023e_220409_165810_126616294_ccs	13320	gene						9183	9524	-	CC5R_00000447	PF01479	S4 domain	sp|A1EA10|RR4_AGRST	ALOMY0G46728
CC5R	Resistant	m64023e_220409_165810_126616294_ccs	13320	gene						9800	10279	+	CC5R_00000448	PF00329	Respiratory-chain NADH dehydrogenase, 30 Kd subunit	sp|Q95H60|NDHJ_WHEAT	ALOMY3G14315
CC5R	Resistant	m64023e_220409_165810_126616680_ccs	8100	gene						1218	1763	+	CC5R_00001190	PF13456	Reverse transcriptase-like		ALOMY3G15139
CC5R	Resistant	m64023e_220409_165810_126814875_ccs	10926	gene						3691	4392	+	CC5R_00000808	PF00181	Ribosomal Proteins L2, RNA binding domain	sp|A8Y9C8|RK2_LOLPR	ALOMY0G47044
CC5R	Resistant	m64023e_220409_165810_126814875_ccs	10926	gene						5664	7215	-	CC5R_00000809	PF00124	Photosynthetic reaction centre protein	sp|P56318|PSBA_CHLVU	ALOMY0G46720
CC5R	Resistant	m64023e_220409_165810_126943392_ccs	9768	gene						5870	6139	-	CC5R_00000984				ALOMY6G42914
CC5R	Resistant	m64023e_220409_165810_127272069_ccs	10980	gene						52	1662	+	CC5R_00000796	PF00361	Proton-conducting membrane transporter	sp|P0CD51|NU2C2_SORBI	ALOMY0G46717
CC5R	Resistant	m64023e_220409_165810_127272069_ccs	10980	gene						1664	2278	+	CC5R_00000797	PF00361	Proton-conducting membrane transporter	sp|P0CD55|NU2C2_WHEAT	ALOMY0G46718
CC5R	Resistant	m64023e_220409_165810_127272069_ccs	10980	gene						2947	4644	-	CC5R_00000798			sp|Q37066|YCF73_ORYSJ	ALOMY7G37953
CC5R	Resistant	m64023e_220409_165810_127272069_ccs	10980	gene						3500	6101	+	CC5R_00000799	PF00181	Ribosomal Proteins L2, RNA binding domain	sp|A8Y9C8|RK2_LOLPR	ALOMY0G47044
CC5R	Resistant	m64023e_220409_165810_127272069_ccs	10980	gene						7029	8253	+	CC5R_00000800	PF00237	Ribosomal protein L22p/L17e	sp|Q95H48|RK22_WHEAT	ALOMY0G46680
CC5R	Resistant	m64023e_220409_165810_127272069_ccs	10980	gene						7369	10313	-	CC5R_00000801	PF00238	Ribosomal protein L14p/L23e	sp|A8Y9C3|RK14_LOLPR	ALOMY0G46734
CC5R	Resistant	m64023e_220409_165810_127272069_ccs	10980	gene						8326	10591	+	CC5R_00000802	PF00189	Ribosomal protein S3, C-terminal domain	sp|A1E9W3|RR3_SORBI	ALOMY0G46735
CC5R	Resistant	m64023e_220409_165810_127272116_ccs01	7175	gene						2958	5937	-	CC5R_00001321				ALOMY1G08296
CC5R	Resistant	m64023e_220409_165810_127272202_ccs	7050	gene						5973	6866	-	CC5R_00001334	PF00651	BTB/POZ domain	sp|Q8L765|BPM1_ARATH	ALOMY3G16216
CC5R	Resistant	m64023e_220409_165810_127469351_ccs0	3180	gene						2923	3161	-	CC5R_00001727				ALOMY7G38722
CC5R	Resistant	m64023e_220409_165810_127469917_ccs	11550	gene						2775	5724	+	CC5R_00000687	PF04195	Putative gypsy type transposon		ALOMY2G20844
CC5R	Resistant	m64023e_220409_165810_127535552_ccs01	2800	gene						1289	2772	+	CC5R_00001747	PF00411	Ribosomal protein S11	sp|A1EA40|RPOA_AGRST	ALOMY0G46677
CC5R	Resistant	m64023e_220409_165810_127535762_ccs01	19427	gene						14389	17301	-	CC5R_00000087	PF04195	Putative gypsy type transposon		ALOMY2G20844
CC5R	Resistant	m64023e_220409_165810_127601011_ccs	16620	gene						239	1294	+	CC5R_00000204	PF10705	Chloroplast protein precursor Ycf15 putative	sp|Q6ENR3|YCF15_SACOF	ALOMY0G47044
CC5R	Resistant	m64023e_220409_165810_127601011_ccs	16620	gene						1963	2539	-	CC5R_00000205	PF00361	Proton-conducting membrane transporter	sp|P0CD55|NU2C2_WHEAT	ALOMY0G47045
CC5R	Resistant	m64023e_220409_165810_127601011_ccs	16620	gene						2581	4985	-	CC5R_00000206	PF00177	Ribosomal protein S7p/S5e	sp|P0CD51|NU2C2_SORBI	ALOMY6G44070
CC5R	Resistant	m64023e_220409_165810_127601011_ccs	16620	gene						6089	6400	+	CC5R_00000207				ALOMY0G47054
CC5R	Resistant	m64023e_220409_165810_127730354_ccs	4680	gene						1076	2672	+	CC5R_00001614	PF05755	Rubber elongation factor protein (REF)	sp|Q9FRA7|Y5513_ORYSJ	ALOMY5G35654
CC5R	Resistant	m64023e_220409_165810_127992942_ccs0	12900	gene						1609	1953	-	CC5R_00000533
CC5R	Resistant	m64023e_220409_165810_127993492_ccs	9480	gene						6924	7313	-	CC5R_00001012				ALOMY7G38996
CC5R	Resistant	m64023e_220409_165810_127993492_ccs	9480	gene						8443	8631	+	CC5R_00001013				ALOMY6G44644
CC5R	Resistant	m64023e_220409_165810_128189485_ccs0	16290	gene						1267	1599	+	CC5R_00000232				ALOMY1G02418
CC5R	Resistant	m64023e_220409_165810_128189485_ccs0	16290	gene						2463	7965	-	CC5R_00000233				ALOMY3G14344
CC5R	Resistant	m64023e_220409_165810_128189485_ccs0	16290	gene						9241	9438	-	CC5R_00000234				ALOMY6G45820
CC5R	Resistant	m64023e_220409_165810_128189485_ccs0	16290	gene						10758	12732	-	CC5R_00000235	PF03088	Strictosidine synthase	sp|Q8VWF6|SSL3_ARATH	ALOMY1G02417
CC5R	Resistant	m64023e_220409_165810_128189485_ccs0	16290	gene						13680	16027	-	CC5R_00000236			sp|Q75LL6|TADA2_ORYSJ	ALOMY1G02416	TF
CC5R	Resistant	m64023e_220409_165810_128319966_ccs	12398	gene						9022	9339	+	CC5R_00000580				ALOMY4G28672
CC5R	Resistant	m64023e_220409_165810_128714240_ccs	17236	gene						6	1872	-	CC5R_00000149	PF00421	Photosystem II protein	sp|P11849|PSBD_HORVU	ALOMY2G18054
CC5R	Resistant	m64023e_220409_165810_128714240_ccs	17236	gene						7323	8858	+	CC5R_00000150	PF01824	MatK/TrnK amino terminal region	sp|Q9MUZ4|MATK_PHLPR	ALOMY0G46721
CC5R	Resistant	m64023e_220409_165810_128714240_ccs	17236	gene						9522	10475	+	CC5R_00000151	PF00124	Photosynthetic reaction centre protein	sp|A1E9Y8|PSBA_AGRST	ALOMY0G46720
CC5R	Resistant	m64023e_220409_165810_128714240_ccs	17236	gene						10751	11299	-	CC5R_00000152	PF03947	Ribosomal Proteins L2, C-terminal domain	sp|P11534|RK2_WHEAT	ALOMY2G21925
CC5R	Resistant	m64023e_220409_165810_128714240_ccs	17236	gene						12227	14828	-	CC5R_00000153	PF00181	Ribosomal Proteins L2, RNA binding domain	sp|A8Y9C8|RK2_LOLPR	ALOMY0G47044
CC5R	Resistant	m64023e_220409_165810_128714240_ccs	17236	gene						13684	15381	+	CC5R_00000154			sp|Q37066|YCF73_ORYSJ	ALOMY7G37953
CC5R	Resistant	m64023e_220409_165810_128714240_ccs	17236	gene						16050	16961	-	CC5R_00000155	PF00361	Proton-conducting membrane transporter	sp|P0CD55|NU2C2_WHEAT	ALOMY0G46718
CC5R	Resistant	m64023e_220409_165810_128909355_ccs	8970	gene						6052	6868	-	CC5R_00001071				ALOMY4G29304
CC5R	Resistant	m64023e_220409_165810_128976141_ccs	6180	gene						1812	3949	+	CC5R_00001426	PF00067	Cytochrome P450	sp|Q43255|C71C2_MAIZE	ALOMY3G12422
CC5R	Resistant	m64023e_220409_165810_128976141_ccs	6180	gene						3958	4209	+	CC5R_00001427	PF00067	Cytochrome P450	sp|U5HKE8|C71DZ_CATRO	ALOMY3G16961
CC5R	Resistant	m64023e_220409_165810_129696871_ccs00	1170	gene						410	1158	+	CC5R_00001804			sp|Q0D5R2|CRK10_ORYSJ	ALOMY2G24038
CC5R	Resistant	m64023e_220409_165810_129696871_ccs01	1694	gene						561	1317	+	CC5R_00001795			sp|Q0D5R2|CRK10_ORYSJ	ALOMY2G24038
CC5R	Resistant	m64023e_220409_165810_129894245_ccs	4200	gene						1836	2474	+	CC5R_00001654
CC5R	Resistant	m64023e_220409_165810_129960762_ccs	8820	gene						47	352	-	CC5R_00001105				ALOMY5G31918
CC5R	Resistant	m64023e_220409_165810_130089692_ccs	9600	gene						6947	7561	-	CC5R_00000996			sp|Q39096|ERD15_ARATH	ALOMY6G43887
CC5R	Resistant	m64023e_220409_165810_130089692_ccs	9600	gene						7567	8919	-	CC5R_00000997				ALOMY2G17824
CC5R	Resistant	m64023e_220409_165810_130154886_ccs	7620	gene						72	3316	-	CC5R_00001262	PF03110	SBP domain	sp|Q9LGU7|SPL1_ORYSJ	ALOMY2G22336	TF
CC5R	Resistant	m64023e_220409_165810_130154886_ccs	7620	gene						3464	3794	-	CC5R_00001263				ALOMY2G22337
CC5R	Resistant	m64023e_220409_165810_130287539_ccs0	11160	gene						2127	3051	+	CC5R_00000761	PF12937	F-box-like	sp|Q9SIH5|FB322_ARATH	ALOMY2G19469
CC5R	Resistant	m64023e_220409_165810_130417915_ccs	8550	gene						3164	4455	+	CC5R_00001136				ALOMY4G26194
CC5R	Resistant	m64023e_220409_165810_130482446_ccs	8102	gene						2277	5529	+	CC5R_00001189				ALOMY1G05155
CC5R	Resistant	m64023e_220409_165810_130614155_ccs	4230	gene						1130	1600	+	CC5R_00001650	PF00282	Pyridoxal-dependent decarboxylase conserved domain	sp|Q94EE9|TYDC_ORYSJ	ALOMY2G25124
CC5R	Resistant	m64023e_220409_165810_130614725_ccs	5634	gene						817	2548	-	CC5R_00001484				ALOMY5G32141
CC5R	Resistant	m64023e_220409_165810_130614725_ccs	5634	gene						2751	3026	-	CC5R_00001485	PF04195	Putative gypsy type transposon		ALOMY5G32141
CC5R	Resistant	m64023e_220409_165810_130614725_ccs	5634	gene						3089	3313	-	CC5R_00001486				ALOMY5G32141
CC5R	Resistant	m64023e_220409_165810_130745858_ccs	7650	gene						455	1457	+	CC5R_00001260				ALOMY2G20844
CC5R	Resistant	m64023e_220409_165810_130745858_ccs	7650	gene						1482	1804	+	CC5R_00001261				ALOMY2G20844
CC5R	Resistant	m64023e_220409_165810_130811542_ccs	10950	gene						648	3419	-	CC5R_00000805				ALOMY2G20844
CC5R	Resistant	m64023e_220409_165810_130811542_ccs	10950	gene						4690	6930	-	CC5R_00000806				ALOMY5G31919
CC5R	Resistant	m64023e_220409_165810_131139198_ccs	6746	gene						19	5083	-	CC5R_00001363	PF04111	Apg6 BARA domain	sp|Q9M367|BECN1_ARATH	ALOMY7G37893
CC5R	Resistant	m64023e_220409_165810_131139900_ccs	5730	gene						42	548	+	CC5R_00001469	PF18052	Rx N-terminal domain	sp|Q2QZF1|PIK6_ORYSJ	ALOMY4G31219
CC5R	Resistant	m64023e_220409_165810_131139900_ccs	5730	gene						579	2977	+	CC5R_00001470	PF00931	NB-ARC domain	sp|F7J0N2|RGA5R_ORYSJ	ALOMY3G16778
CC5R	Resistant	m64023e_220409_165810_131402079_ccs	10080	gene						1741	3374	+	CC5R_00000939				ALOMY5G32141
CC5R	Resistant	m64023e_220409_165810_131402079_ccs	10080	gene						3378	5168	+	CC5R_00000940
CC5R	Resistant	m64023e_220409_165810_131402396_ccs	7470	gene						1176	1328	-	CC5R_00001284
CC5R	Resistant	m64023e_220409_165810_131596698_ccs	13530	gene						5193	6131	+	CC5R_00000412	PF00201	UDP-glucoronosyl and UDP-glucosyl transferase	sp|Q9SGA8|U83A1_ARATH	ALOMY1G02357
CC5R	Resistant	m64023e_220409_165810_131794948_ccs	15330	gene						8	430	-	CC5R_00000288	PF00507	NADH-ubiquinone/plastoquinone oxidoreductase, chain 3	sp|P27062|NU3M_PANGI	ALOMY0G47836
CC5R	Resistant	m64023e_220409_165810_131794948_ccs	15330	gene						8966	9859	+	CC5R_00000289	PF04195	Putative gypsy type transposon		ALOMY1G05155
CC5R	Resistant	m64023e_220409_165810_131794948_ccs	15330	gene						9913	12484	+	CC5R_00000290				ALOMY7G39957
CC5R	Resistant	m64023e_220409_165810_131859590_ccs	2520	gene						53	891	-	CC5R_00001759	PF03083	Sugar efflux transporter for intercellular exchange	sp|Q10LI8|SWT12_ORYSJ	ALOMY6G43919
CC5R	Resistant	m64023e_220409_165810_131860904_ccs	4140	gene						96	3622	+	CC5R_00001655				ALOMY1G06893
CC5R	Resistant	m64023e_220409_165810_131924912_ccs	16583	gene						13705	16289	+	CC5R_00000211				ALOMY2G19108
CC5R	Resistant	m64023e_220409_165810_132251775_ccs	12150	gene						1369	6709	+	CC5R_00000622	PF00361	Proton-conducting membrane transporter	sp|Q32880|NU5C_POAPR	ALOMY0G47048
CC5R	Resistant	m64023e_220409_165810_132251775_ccs	12150	gene						6843	8383	+	CC5R_00000623	PF00499	NADH-ubiquinone/plastoquinone oxidoreductase chain 6	sp|Q95H44|NU6C_WHEAT	ALOMY0G47051
CC5R	Resistant	m64023e_220409_165810_132251775_ccs	12150	gene						8753	10254	+	CC5R_00000624	PF00361	Proton-conducting membrane transporter	sp|P58420|NU4C_WHEAT	ALOMY0G47050
CC5R	Resistant	m64023e_220409_165810_132251775_ccs	12150	gene						10406	11170	-	CC5R_00000625	PF01578	Cytochrome C assembly protein	sp|A1EA58|CCSA_AGRST	ALOMY0G47049
CC5R	Resistant	m64023e_220409_165810_13240912_ccs	13626	gene						8063	8464	+	CC5R_00000405				ALOMY6G44682
CC5R	Resistant	m64023e_220409_165810_132514903_ccs	5610	gene						28	817	-	CC5R_00001487	PF01824	MatK/TrnK amino terminal region	sp|Q9MUZ4|MATK_PHLPR	ALOMY0G46721
CC5R	Resistant	m64023e_220409_165810_132514903_ccs	5610	gene						3374	5518	-	CC5R_00001488	PF01348	Type II intron maturase	sp|A7Y395|PSBA_IPOPU	ALOMY0G46720
CC5R	Resistant	m64023e_220409_165810_132580955_ccs	7864	gene						314	1196	-	CC5R_00001218				ALOMY1G00007
CC5R	Resistant	m64023e_220409_165810_132713291_ccs0	1380	gene						310	621	+	CC5R_00001800				ALOMY0G47054
CC5R	Resistant	m64023e_220409_165810_132778378_ccs	18890	gene						9042	9290	+	CC5R_00000102				ALOMY6G42914
CC5R	Resistant	m64023e_220409_165810_132908503_ccs	9960	gene						6559	6807	-	CC5R_00000952				ALOMY6G42914
CC5R	Resistant	m64023e_220409_165810_133171866_ccs	7392	gene						5496	6605	+	CC5R_00001296	PF03478	Protein of unknown function (DUF295)		ALOMY0G47405
CC5R	Resistant	m64023e_220409_165810_133366816_ccs0	4650	gene						1475	2233	+	CC5R_00001615	PF00076	RNA recognition motif. (a.k.a. RRM, RBD, or RNP domain)	sp|Q8C5Q4|GRSF1_MOUSE	ALOMY4G31042
CC5R	Resistant	m64023e_220409_165810_133366816_ccs01	4650	gene						291	1173	+	CC5R_00001616	PF00076	RNA recognition motif. (a.k.a. RRM, RBD, or RNP domain)	sp|Q5E9J1|HNRPF_BOVIN	ALOMY4G31042
CC5R	Resistant	m64023e_220409_165810_133563070_ccs	10691	gene						6051	6283	+	CC5R_00000831				ALOMY4G30325
CC5R	Resistant	m64023e_220409_165810_133563963_ccs	7761	gene						2078	5672	+	CC5R_00001243	PF01073	3-beta hydroxysteroid dehydrogenase/isomerase family	sp|Q9FX01|HSDD1_ARATH	ALOMY3G13757
CC5R	Resistant	m64023e_220409_165810_134153891_ccs	6430	gene						1539	3065	-	CC5R_00001403	PF00223	Photosystem I psaA/psaB protein	sp|P06407|PSAB_TOBAC	ALOMY0G46725
CC5R	Resistant	m64023e_220409_165810_134153891_ccs	6430	gene						3091	4170	-	CC5R_00001404	PF00223	Photosystem I psaA/psaB protein	sp|P58311|PSAA_WHEAT	ALOMY0G46726
CC5R	Resistant	m64023e_220409_165810_134153891_ccs	6430	gene						4208	5406	-	CC5R_00001405	PF00223	Photosystem I psaA/psaB protein	sp|A4QLJ4|PSAA_LOBMA	ALOMY0G46726
CC5R	Resistant	m64023e_220409_165810_134153961_ccs	11350	gene						8657	9784	+	CC5R_00000716	PF14543	Xylanase inhibitor N-terminal	sp|Q766C3|NEP1_NEPGR	ALOMY1G07345
CC5R	Resistant	m64023e_220409_165810_134349327_ccs	4403	gene						1326	1849	+	CC5R_00001639				ALOMY1G04524
[truncated: 4,860 more rows]
[truncated: 1 more columns]

## Sheet: S2
Supplementary Table 2. Summary and charaterization of eccDNAs detected in multiple herbicide sensitive blackgrass populations
Sample_ID	Category	Predicted_eccDNA	Size	Feature	tRNA #	tRNA_start	tRNA_end	AA	NT	gene_start	gene_end	gene_orientation	gene_ID	pfam	pfam	Uniprot	homologous blackgrass gene	TR/TF	DGE
CC2S	Sensitive	m64023e_220409_165810_125831851_ccs0	1980	gene						13	1878	+	CC2S_00001441	PF00411	Ribosomal protein S11	sp|A1EA40|RPOA_AGRST	ALOMY0G46677
CC2S	Sensitive	m64023e_220409_165810_134807926_ccs	2602	gene						844	2246	+	CC2S_00001419	PF01000	RNA polymerase Rpb3/RpoA insert domain	sp|A1EA40|RPOA_AGRST	ALOMY0G46677
CC2S	Sensitive	m64023e_220409_165810_46990919_ccs	6788	gene						4905	6120	-	CC2S_00001102	PF00189	Ribosomal protein S3, C-terminal domain	sp|A1E9N0|RK22_HORVU	ALOMY0G46680
CC2S	Sensitive	m64023e_220409_165810_141166453_ccs	7124	gene						1695	2310	+	CC2S_00001056				ALOMY0G46690
CC2S	Sensitive	m64023e_220409_165810_141166453_ccs	7124	gene						2313	4869	+	CC2S_00001057				ALOMY0G46691		CC2
CC2S	Sensitive	m64023e_220409_165810_9896118_ccs0	5190	gene						126	4523	+	CC2S_00001233	PF00562	RNA polymerase Rpb2, domain 6	sp|A8Y9G0|RPOB_LOLPR	ALOMY0G46714
CC2S	Sensitive	m64023e_220409_165810_151783257_ccs	1876	gene						16	1835	-	CC2S_00001445	PF00562	RNA polymerase Rpb2, domain 6	sp|Q9XPS7|RPOB_WHEAT	ALOMY0G46714
CC2S	Sensitive	m64023e_220409_165810_148832368_ccs00	1470	gene						20	888	-	CC2S_00001450	PF00361	Proton-conducting membrane transporter	sp|P0CC48|NU2C1_COFAR	ALOMY0G46717
CC2S	Sensitive	m64023e_220409_165810_79365762_ccs0	2940	gene						580	2881	+	CC2S_00001401	PF00361	Proton-conducting membrane transporter	sp|P0CC87|NU2C2_LOLPR	ALOMY0G46717
CC2S	Sensitive	m64023e_220409_165810_136118432_ccs	2040	gene						105	1483	+	CC2S_00001439	PF00361	Proton-conducting membrane transporter	sp|P0CC87|NU2C2_LOLPR	ALOMY0G46717
CC2S	Sensitive	m64023e_220409_165810_178850298_ccs0	1890	gene						247	1884	+	CC2S_00001444	PF00361	Proton-conducting membrane transporter	sp|P0CC87|NU2C2_LOLPR	ALOMY0G46717
CC2S	Sensitive	m64023e_220409_165810_148832368_ccs00	1470	gene						909	1390	-	CC2S_00001451	PF00361	Proton-conducting membrane transporter	sp|P0CC53|NU2C2_CYCTA	ALOMY0G46718
CC2S	Sensitive	m64023e_220409_165810_125569610_ccs0	5340	gene						4647	5222	-	CC2S_00001219	PF00361	Proton-conducting membrane transporter	sp|P0CD55|NU2C2_WHEAT	ALOMY0G46718
CC2S	Sensitive	m64023e_220409_165810_43844036_ccs01	960	gene						290	927	-	CC2S_00001457	PF03947	Ribosomal Proteins L2, C-terminal domain	sp|P11534|RK2_WHEAT	ALOMY0G46719
CC2S	Sensitive	m64023e_220409_165810_78776523_ccs	18311	gene						10835	11788	+	CC2S_00000071	PF00124	Photosynthetic reaction centre protein	sp|A1E9Y8|PSBA_AGRST	ALOMY0G46720
CC2S	Sensitive	m64023e_220409_165810_15794565_ccs	16860	gene						369	12510	-	CC2S_00000116	PF00124	Photosynthetic reaction centre protein	sp|P05337|PSBA_HORVU	ALOMY0G46720
CC2S	Sensitive	m64023e_220409_165810_150274742_ccs	14580	gene						13504	14535	+	CC2S_00000230	PF00124	Photosynthetic reaction centre protein	sp|P12463|PSBA_WHEAT	ALOMY0G46720
CC2S	Sensitive	m64023e_220409_165810_119408405_ccs	5010	gene						1493	4522	-	CC2S_00001251	PF00124	Photosynthetic reaction centre protein	sp|Q70Y17|PSBA_AMBTC	ALOMY0G46720
CC2S	Sensitive	m64023e_220409_165810_78776523_ccs	18311	gene						8636	10171	+	CC2S_00000070	PF01824	MatK/TrnK amino terminal region	sp|Q9MUZ4|MATK_PHLPR	ALOMY0G46721
CC2S	Sensitive	m64023e_220409_165810_9505012_ccs	6960	gene						74	5983	+	CC2S_00001076	PF01824	MatK/TrnK amino terminal region	sp|Q9MUZ4|MATK_PHLPR	ALOMY0G46721
CC2S	Sensitive	m64023e_220409_165810_165807365_ccs	5820	gene						4984	5794	+	CC2S_00001182	PF01824	MatK/TrnK amino terminal region	sp|Q9MUZ4|MATK_PHLPR	ALOMY0G46721
CC2S	Sensitive	m64023e_220409_165810_42534122_ccs	5460	gene						4013	5197	-	CC2S_00001208	PF01824	MatK/TrnK amino terminal region	sp|Q9MUZ4|MATK_PHLPR	ALOMY0G46721
CC2S	Sensitive	m64023e_220409_165810_165807365_ccs	5820	gene						14	4816	+	CC2S_00001181	PF01348	Type II intron maturase	sp|Q9MUZ6|MATK_AVESA	ALOMY0G46721
CC2S	Sensitive	m64023e_220409_165810_66259569_ccs	3628	gene						2483	3256	-	CC2S_00001366	PF01348	Type II intron maturase	sp|Q9MUZ6|MATK_AVESA	ALOMY0G46721
CC2S	Sensitive	m64023e_220409_165810_176095957_ccs	13830	gene						8383	9090	+	CC2S_00000338	PF00421	Photosystem II protein	sp|P11095|PSBC_HORVU	ALOMY0G46722
CC2S	Sensitive	m64023e_220409_165810_78973015_ccs	6896	gene						397	1819	-	CC2S_00001083	PF00421	Photosystem II protein	sp|Q9XPS4|PSBC_WHEAT	ALOMY0G46722
CC2S	Sensitive	m64023e_220409_165810_65799936_ccs01	3012	gene						743	2998	+	CC2S_00001396	PF00318	Ribosomal protein S2	sp|A1EA01|RR2_AGRST	ALOMY0G46723
CC2S	Sensitive	m64023e_220409_165810_84280646_ccs	14439	gene						9867	11573	-	CC2S_00000262	PF00119	ATP synthase A chain	sp|A1EA02|ATPI_AGRST	ALOMY0G46723
CC2S	Sensitive	m64023e_220409_165810_13568313_ccs	10216	gene						1	1427	+	CC2S_00000725	PF00119	ATP synthase A chain	sp|A1EA02|ATPI_AGRST	ALOMY0G46723
CC2S	Sensitive	m64023e_220409_165810_118556589_ccs0	6510	gene						2190	2933	+	CC2S_00001131	PF00119	ATP synthase A chain	sp|A1EA02|ATPI_AGRST	ALOMY0G46723
CC2S	Sensitive	m64023e_220409_165810_13502701_ccs	5874	gene						4612	5845	-	CC2S_00001176	PF00119	ATP synthase A chain	sp|A1EA02|ATPI_AGRST	ALOMY0G46723
CC2S	Sensitive	m64023e_220409_165810_20318558_ccs	23550	gene						18738	20442	+	CC2S_00000004	PF00318	Ribosomal protein S2	sp|A1EA02|ATPI_AGRST	ALOMY0G46723
CC2S	Sensitive	m64023e_220409_165810_132384149_ccs	18720	gene						14957	16660	-	CC2S_00000057	PF00318	Ribosomal protein S2	sp|A1EA02|ATPI_AGRST	ALOMY0G46723
CC2S	Sensitive	m64023e_220409_165810_24839302_ccs	11490	gene						47	1660	+	CC2S_00000601	PF00318	Ribosomal protein S2	sp|A1EA02|ATPI_AGRST	ALOMY0G46723
CC2S	Sensitive	m64023e_220409_165810_65799936_ccs01	3012	gene						92	591	+	CC2S_00001395	PF00119	ATP synthase A chain	sp|A8Y9G4|ATPI_LOLPR	ALOMY0G46723
CC2S	Sensitive	m64023e_220409_165810_132384149_ccs	18720	gene						10014	14808	-	CC2S_00000056	PF00006	ATP synthase alpha/beta family, nucleotide-binding domain	sp|A1EA05|ATPA_AGRST	ALOMY0G46724
CC2S	Sensitive	m64023e_220409_165810_13568313_ccs	10216	gene						1576	6372	+	CC2S_00000726	PF00006	ATP synthase alpha/beta family, nucleotide-binding domain	sp|A1EA05|ATPA_AGRST	ALOMY0G46724
CC2S	Sensitive	m64023e_220409_165810_56624978_ccs	3840	gene						3	3744	-	CC2S_00001349	PF00006	ATP synthase alpha/beta family, nucleotide-binding domain	sp|A1EA05|ATPA_AGRST	ALOMY0G46724
CC2S	Sensitive	m64023e_220409_165810_20318558_ccs	23550	gene						22962	23494	+	CC2S_00000005			sp|A1EA05|ATPA_AGRST	ALOMY0G46724
CC2S	Sensitive	m64023e_220409_165810_84280646_ccs	14439	gene						5819	6874	-	CC2S_00000260	PF00006	ATP synthase alpha/beta family, nucleotide-binding domain	sp|A8Y9G7|ATPA_LOLPR	ALOMY0G46724
CC2S	Sensitive	m64023e_220409_165810_24839302_ccs	11490	gene						4176	5132	+	CC2S_00000602	PF00006	ATP synthase alpha/beta family, nucleotide-binding domain	sp|A8Y9G7|ATPA_LOLPR	ALOMY0G46724
CC2S	Sensitive	m64023e_220409_165810_118556589_ccs0	6510	gene						3082	6453	+	CC2S_00001132	PF00006	ATP synthase alpha/beta family, nucleotide-binding domain	sp|A8Y9G7|ATPA_LOLPR	ALOMY0G46724
CC2S	Sensitive	m64023e_220409_165810_13502701_ccs	5874	gene						361	3287	+	CC2S_00001175	PF00006	ATP synthase alpha/beta family, nucleotide-binding domain	sp|A8Y9G7|ATPA_LOLPR	ALOMY0G46724
CC2S	Sensitive	m64023e_220409_165810_164694717_ccs0	2460	gene						1066	1839	+	CC2S_00001422	PF00006	ATP synthase alpha/beta family, nucleotide-binding domain	sp|A8Y9G7|ATPA_LOLPR	ALOMY0G46724
CC2S	Sensitive	m64023e_220409_165810_24839302_ccs	11490	gene						5300	5670	+	CC2S_00000603	PF00306	ATP synthase alpha/beta chain, C terminal domain	sp|Q6L3A1|ATPA_SACHY	ALOMY0G46724
CC2S	Sensitive	m64023e_220409_165810_163185652_ccs	10050	gene						8494	8863	+	CC2S_00000740	PF00306	ATP synthase alpha/beta chain, C terminal domain	sp|Q6L3A1|ATPA_SACHY	ALOMY0G46724
CC2S	Sensitive	m64023e_220409_165810_13568313_ccs	10216	gene						5425	7583	-	CC2S_00000727	PF00223	Photosystem I psaA/psaB protein	sp|A1E9S3|PSAB_SORBI	ALOMY0G46725
CC2S	Sensitive	m64023e_220409_165810_84280646_ccs	14439	gene						2558	4388	+	CC2S_00000258	PF00223	Photosystem I psaA/psaB protein	sp|A1EA07|PSAB_AGRST	ALOMY0G46725
CC2S	Sensitive	m64023e_220409_165810_120784848_ccs	14205	gene						8033	13954	+	CC2S_00000299	PF00223	Photosystem I psaA/psaB protein	sp|A1EA07|PSAB_AGRST	ALOMY0G46725
CC2S	Sensitive	m64023e_220409_165810_163185652_ccs	10050	gene						5526	8222	+	CC2S_00000739	PF00223	Photosystem I psaA/psaB protein	sp|A1EA07|PSAB_AGRST	ALOMY0G46725
CC2S	Sensitive	m64023e_220409_165810_83036815_ccs01	2040	gene						767	2026	+	CC2S_00001438	PF00223	Photosystem I psaA/psaB protein	sp|P58386|PSAB_WHEAT	ALOMY0G46725
CC2S	Sensitive	m64023e_220409_165810_84280646_ccs	14439	gene						4408	5045	+	CC2S_00000259	PF00223	Photosystem I psaA/psaB protein	sp|Q06GZ8|PSAB_DRIGR	ALOMY0G46725
CC2S	Sensitive	m64023e_220409_165810_24839302_ccs	11490	gene						6344	8958	-	CC2S_00000604	PF00223	Photosystem I psaA/psaB protein	sp|Q06GZ8|PSAB_DRIGR	ALOMY0G46725
CC2S	Sensitive	m64023e_220409_165810_163185652_ccs	10050	gene						4476	5500	+	CC2S_00000738	PF00223	Photosystem I psaA/psaB protein	sp|A1E9J1|PSAA_HORVU	ALOMY0G46726
CC2S	Sensitive	m64023e_220409_165810_24839302_ccs	11490	gene						9016	10512	+	CC2S_00000605	PF00223	Photosystem I psaA/psaB protein	sp|A1EA08|PSAA_AGRST	ALOMY0G46726
CC2S	Sensitive	m64023e_220409_165810_52887964_ccs	2640	gene						18	1118	-	CC2S_00001415	PF00223	Photosystem I psaA/psaB protein	sp|A1EA08|PSAA_AGRST	ALOMY0G46726
CC2S	Sensitive	m64023e_220409_165810_84280646_ccs	14439	gene						216	2529	+	CC2S_00000257	PF00223	Photosystem I psaA/psaB protein	sp|A4QLJ4|PSAA_LOBMA	ALOMY0G46726
CC2S	Sensitive	m64023e_220409_165810_132384149_ccs	18720	gene						5314	7627	+	CC2S_00000055	PF00223	Photosystem I psaA/psaB protein	sp|P58311|PSAA_WHEAT	ALOMY0G46726
CC2S	Sensitive	m64023e_220409_165810_163185652_ccs	10050	gene						3188	4440	+	CC2S_00000737	PF00223	Photosystem I psaA/psaB protein	sp|P58311|PSAA_WHEAT	ALOMY0G46726
CC2S	Sensitive	m64023e_220409_165810_71109359_ccs0	3938	gene						1495	3518	-	CC2S_00001338	PF00223	Photosystem I psaA/psaB protein	sp|P58311|PSAA_WHEAT	ALOMY0G46726
CC2S	Sensitive	m64023e_220409_165810_52887964_ccs	2640	gene						1497	2576	-	CC2S_00001416	PF00223	Photosystem I psaA/psaB protein	sp|P58311|PSAA_WHEAT	ALOMY0G46726
CC2S	Sensitive	m64023e_220409_165810_83036815_ccs01	2040	gene						322	741	+	CC2S_00001437	PF00223	Photosystem I psaA/psaB protein	sp|Q14FF7|PSAA_POPAL	ALOMY0G46726
CC2S	Sensitive	m64023e_220409_165810_98567805_ccs	9720	gene						3458	6217	-	CC2S_00000783	PF00223	Photosystem I psaA/psaB protein	sp|Q9MTN8|PSAA_OENEH	ALOMY0G46726
CC2S	Sensitive	m64023e_220409_165810_132384149_ccs	18720	gene						3609	4723	+	CC2S_00000054	PF00515	Tetratricopeptide repeat	sp|A8Y9H1|YCF3_LOLPR	ALOMY0G46727
CC2S	Sensitive	m64023e_220409_165810_163185652_ccs	10050	gene						1484	2597	+	CC2S_00000736	PF00515	Tetratricopeptide repeat	sp|A8Y9H1|YCF3_LOLPR	ALOMY0G46727
CC2S	Sensitive	m64023e_220409_165810_98567805_ccs	9720	gene						6807	7920	-	CC2S_00000784	PF00515	Tetratricopeptide repeat	sp|A8Y9H1|YCF3_LOLPR	ALOMY0G46727
CC2S	Sensitive	m64023e_220409_165810_71109359_ccs0	3938	gene						169	1282	-	CC2S_00001337	PF00515	Tetratricopeptide repeat	sp|A8Y9H1|YCF3_LOLPR	ALOMY0G46727
CC2S	Sensitive	m64023e_220409_165810_4654042_ccs	2850	gene						725	988	+	CC2S_00001403	PF00515	Tetratricopeptide repeat	sp|A8Y9H1|YCF3_LOLPR	ALOMY0G46727
CC2S	Sensitive	m64023e_220409_165810_120784848_ccs	14205	gene						6891	8006	+	CC2S_00000298			sp|P58257|YCF3_WHEAT	ALOMY0G46727
CC2S	Sensitive	m64023e_220409_165810_120784848_ccs	14205	gene						4435	5041	+	CC2S_00000297	PF00163	Ribosomal protein S4/S9 N-terminal domain	sp|A1EA10|RR4_AGRST	ALOMY0G46728
CC2S	Sensitive	m64023e_220409_165810_98567805_ccs	9720	gene						53	658	-	CC2S_00000782	PF01479	S4 domain	sp|A1EA10|RR4_AGRST	ALOMY0G46728
CC2S	Sensitive	m64023e_220409_165810_4654042_ccs	2850	gene						1111	1716	+	CC2S_00001404	PF01479	S4 domain	sp|A1EA10|RR4_AGRST	ALOMY0G46728
CC2S	Sensitive	m64023e_220409_165810_50595071_ccs	12510	gene						5718	6669	-	CC2S_00000485	PF00006	ATP synthase alpha/beta family, nucleotide-binding domain	sp|A8Y9H7|ATPB_LOLPR	ALOMY0G46729
CC2S	Sensitive	m64023e_220409_165810_43190816_ccs	3827	gene						2018	3801	+	CC2S_00001352	PF02874	ATP synthase alpha/beta family, beta-barrel domain	sp|P00828|ATPB_HORVU	ALOMY0G46729
CC2S	Sensitive	m64023e_220409_165810_157484294_ccs	6420	gene						251	4575	-	CC2S_00001142	PF00006	ATP synthase alpha/beta family, nucleotide-binding domain	sp|P00828|ATPB_HORVU	ALOMY0G46729
CC2S	Sensitive	m64023e_220409_165810_16714263_ccs	6090	gene						3165	4082	-	CC2S_00001159	PF00006	ATP synthase alpha/beta family, nucleotide-binding domain	sp|P00828|ATPB_HORVU	ALOMY0G46729
CC2S	Sensitive	m64023e_220409_165810_146737547_ccs	3849	gene						1213	3840	+	CC2S_00001347	PF00006	ATP synthase alpha/beta family, nucleotide-binding domain	sp|P00828|ATPB_HORVU	ALOMY0G46729
CC2S	Sensitive	m64023e_220409_165810_84281205_ccs	3390	gene						2339	3346	-	CC2S_00001380	PF00006	ATP synthase alpha/beta family, nucleotide-binding domain	sp|P00828|ATPB_HORVU	ALOMY0G46729
CC2S	Sensitive	m64023e_220409_165810_87163049_ccs	14040	gene						3188	4677	-	CC2S_00000310	PF00006	ATP synthase alpha/beta family, nucleotide-binding domain	sp|P62614|ATPB_AEGCR	ALOMY0G46729
CC2S	Sensitive	m64023e_220409_165810_43190816_ccs	3827	gene						68	1018	+	CC2S_00001351	PF00006	ATP synthase alpha/beta family, nucleotide-binding domain	sp|Q05373|ATPB_SYNP1	ALOMY0G46729
CC2S	Sensitive	m64023e_220409_165810_87163049_ccs	14040	gene						10247	11833	+	CC2S_00000311	PF01333	Apocytochrome F, C-terminal	sp|A1EA21|CYF_AGRST	ALOMY0G46730
CC2S	Sensitive	m64023e_220409_165810_53084648_ccs	14370	gene						2865	13865	-	CC2S_00000283	PF16639	Apocytochrome F, N-terminal	sp|A1EA21|CYF_AGRST	ALOMY0G46730
CC2S	Sensitive	m64023e_220409_165810_126944446_ccs	12390	gene						2829	5818	+	CC2S_00000496	PF16639	Apocytochrome F, N-terminal	sp|A1EA21|CYF_AGRST	ALOMY0G46730
CC2S	Sensitive	m64023e_220409_165810_62260783_ccs	10682	gene						1593	10645	-	CC2S_00000679	PF16639	Apocytochrome F, N-terminal	sp|A1EA21|CYF_AGRST	ALOMY0G46730
CC2S	Sensitive	m64023e_220409_165810_59508232_ccs	9180	gene						1981	8498	+	CC2S_00000838	PF16639	Apocytochrome F, N-terminal	sp|A1EA21|CYF_AGRST	ALOMY0G46730
CC2S	Sensitive	m64023e_220409_165810_150929673_ccs	5910	gene						75	4493	+	CC2S_00001170	PF00016	Ribulose bisphosphate carboxylase large chain, catalytic domain	sp|A8Y9H8|RBL_LOLPR	ALOMY0G46730
CC2S	Sensitive	m64023e_220409_165810_25692721_ccs	5280	gene						1522	3696	+	CC2S_00001228	PF02392	Ycf4	sp|A8Y9I0|YCF4_LOLPR	ALOMY0G46730
CC2S	Sensitive	m64023e_220409_165810_9111972_ccs0	3300	gene						380	2994	-	CC2S_00001387	PF03040	CemA family	sp|A8Y9I1|CEMA_LOLPR	ALOMY0G46730
CC2S	Sensitive	m64023e_220409_165810_95291634_ccs01	3604	gene						1833	3409	-	CC2S_00001367	PF02392	Ycf4	sp|A8Y9I1|CEMA_LOLPR	ALOMY0G46730
CC2S	Sensitive	m64023e_220409_165810_31195705_ccs	12690	gene						9305	9955	+	CC2S_00000453	PF00574	Clp protease	sp|P0C314|CLPP_ORYSJ	ALOMY0G46731
CC2S	Sensitive	m64023e_220409_165810_83036743_ccs	10669	gene						4423	5073	-	CC2S_00000687	PF00574	Clp protease	sp|P0C314|CLPP_ORYSJ	ALOMY0G46731
CC2S	Sensitive	m64023e_220409_165810_53084648_ccs	14370	gene						1610	2579	+	CC2S_00000282	PF00574	Clp protease	sp|P26567|CLPP_MAIZE	ALOMY0G46731
CC2S	Sensitive	m64023e_220409_165810_126944446_ccs	12390	gene						527	1496	-	CC2S_00000495	PF00574	Clp protease	sp|P26567|CLPP_MAIZE	ALOMY0G46731
CC2S	Sensitive	m64023e_220409_165810_98960259_ccs	10755	gene						7703	8672	-	CC2S_00000672	PF00574	Clp protease	sp|P26567|CLPP_MAIZE	ALOMY0G46731
CC2S	Sensitive	m64023e_220409_165810_82117885_ccs	8130	gene						1465	2362	-	CC2S_00000940	PF00574	Clp protease	sp|P26567|CLPP_MAIZE	ALOMY0G46731
CC2S	Sensitive	m64023e_220409_165810_119800945_ccs	5833	gene						356	792	+	CC2S_00001180	PF00574	Clp protease	sp|P26567|CLPP_MAIZE	ALOMY0G46731
CC2S	Sensitive	m64023e_220409_165810_92473120_ccs	4050	gene						2186	2622	+	CC2S_00001333	PF00574	Clp protease	sp|P26567|CLPP_MAIZE	ALOMY0G46731
CC2S	Sensitive	m64023e_220409_165810_26346338_ccs	7626	gene						859	3771	-	CC2S_00000989	PF00411	Ribosomal protein S11	sp|A1EA40|RPOA_AGRST	ALOMY0G46732
CC2S	Sensitive	m64023e_220409_165810_161417192_ccs	2100	gene						480	2099	-	CC2S_00001436	PF00411	Ribosomal protein S11	sp|A1EA40|RPOA_AGRST	ALOMY0G46732
CC2S	Sensitive	m64023e_220409_165810_31195705_ccs	12690	gene						28	3283	+	CC2S_00000452	PF00411	Ribosomal protein S11	sp|A8Y9B8|RPOA_LOLPR	ALOMY0G46732
CC2S	Sensitive	m64023e_220409_165810_78973781_ccs	11187	gene						5738	9031	-	CC2S_00000642	PF00411	Ribosomal protein S11	sp|A8Y9B8|RPOA_LOLPR	ALOMY0G46732
CC2S	Sensitive	m64023e_220409_165810_170328696_ccs01	7800	gene						150	2928	+	CC2S_00000969	PF00411	Ribosomal protein S11	sp|A8Y9B8|RPOA_LOLPR	ALOMY0G46732
CC2S	Sensitive	m64023e_220409_165810_153814978_ccs	3780	gene						86	1420	-	CC2S_00001356	PF00411	Ribosomal protein S11	sp|A8Y9B8|RPOA_LOLPR	ALOMY0G46732
CC2S	Sensitive	m64023e_220409_165810_97192636_ccs	7830	gene						310	7713	+	CC2S_00000966	PF00421	Photosystem II protein	sp|P10900|PSBB_HORVU	ALOMY0G46732
CC2S	Sensitive	m64023e_220409_165810_170328696_ccs01	7800	gene						7396	7587	+	CC2S_00000971	PF00238	Ribosomal protein L14p/L23e	sp|A8Y9C3|RK14_LOLPR	ALOMY0G46734
CC2S	Sensitive	m64023e_220409_165810_78973781_ccs	11187	gene						10622	11137	-	CC2S_00000643	PF00189	Ribosomal protein S3, C-terminal domain	sp|A8Y9C5|RR3_LOLPR	ALOMY0G46735
CC2S	Sensitive	m64023e_220409_165810_26346338_ccs	7626	gene						6512	7573	-	CC2S_00000991	PF00189	Ribosomal protein S3, C-terminal domain	sp|A8Y9C5|RR3_LOLPR	ALOMY0G46735
CC2S	Sensitive	m64023e_220409_165810_127598749_ccs	16585	gene						15145	15859	-	CC2S_00000130				ALOMY0G46738
CC2S	Sensitive	m64023e_220409_165810_156371182_ccs	11730	gene						1452	1940	-	CC2S_00000568				ALOMY0G46820
CC2S	Sensitive	m64023e_220409_165810_112396989_ccs	15990	gene						3284	3580	+	CC2S_00000158	PF03242	Late embryogenesis abundant protein		ALOMY0G46993
CC2S	Sensitive	m64023e_220409_165810_112396989_ccs	15990	gene						5513	5692	+	CC2S_00000159	PF03242	Late embryogenesis abundant protein		ALOMY0G46993
CC2S	Sensitive	m64023e_220409_165810_29493803_ccs	7980	gene						3318	4896	-	CC2S_00000951	PF00067	Cytochrome P450	sp|Q43135|C79A1_SORBI	ALOMY0G47010
CC2S	Sensitive	m64023e_220409_165810_55183596_ccs	4138	gene						2155	2733	+	CC2S_00001329			sp|Q8GUH2|Y1015_ARATH	ALOMY0G47031
CC2S	Sensitive	m64023e_220409_165810_103940392_ccs	11580	gene						175	342	+	CC2S_00000588	PF00420	NADH-ubiquinone/plastoquinone oxidoreductase chain 4L	sp|P69379|NU4LC_WHEAT	ALOMY0G47038
CC2S	Sensitive	m64023e_220409_165810_56952800_ccs	14400	gene						3059	3574	-	CC2S_00000278	PF00346	Respiratory-chain NADH dehydrogenase, 49 Kd subunit	sp|B8Y2U9|NDHH_FESAR	ALOMY0G47042
CC2S	Sensitive	m64023e_220409_165810_1180982_ccs	11670	gene						5793	6975	+	CC2S_00000580	PF00346	Respiratory-chain NADH dehydrogenase, 49 Kd subunit	sp|B8Y2U9|NDHH_FESAR	ALOMY0G47042
CC2S	Sensitive	m64023e_220409_165810_49152726_ccs	18891	gene						160	1029	+	CC2S_00000041	PF00346	Respiratory-chain NADH dehydrogenase, 49 Kd subunit	sp|P0C337|NDHH_ORYSJ	ALOMY0G47042
CC2S	Sensitive	m64023e_220409_165810_128320570_ccs	18861	gene						17623	18375	+	CC2S_00000051	PF00346	Respiratory-chain NADH dehydrogenase, 49 Kd subunit	sp|P0C337|NDHH_ORYSJ	ALOMY0G47042
CC2S	Sensitive	m64023e_220409_165810_111347307_ccs	16544	gene						12297	12845	-	CC2S_00000137	PF00346	Respiratory-chain NADH dehydrogenase, 49 Kd subunit	sp|P0C337|NDHH_ORYSJ	ALOMY0G47042
CC2S	Sensitive	m64023e_220409_165810_107481113_ccs	15660	gene						5972	7002	+	CC2S_00000169	PF00346	Respiratory-chain NADH dehydrogenase, 49 Kd subunit	sp|P0C337|NDHH_ORYSJ	ALOMY0G47042
CC2S	Sensitive	m64023e_220409_165810_81855675_ccs	15008	gene						11929	13068	-	CC2S_00000204	PF00346	Respiratory-chain NADH dehydrogenase, 49 Kd subunit	sp|P0C337|NDHH_ORYSJ	ALOMY0G47042
CC2S	Sensitive	m64023e_220409_165810_21890822_ccs	14524	gene						2480	3619	-	CC2S_00000238	PF00346	Respiratory-chain NADH dehydrogenase, 49 Kd subunit	sp|P0C337|NDHH_ORYSJ	ALOMY0G47042
CC2S	Sensitive	m64023e_220409_165810_61344001_ccs	14430	gene						8663	9325	+	CC2S_00000266	PF00346	Respiratory-chain NADH dehydrogenase, 49 Kd subunit	sp|P0C337|NDHH_ORYSJ	ALOMY0G47042
CC2S	Sensitive	m64023e_220409_165810_22743891_ccs	14404	gene						9102	10241	-	CC2S_00000275	PF00346	Respiratory-chain NADH dehydrogenase, 49 Kd subunit	sp|P0C337|NDHH_ORYSJ	ALOMY0G47042
CC2S	Sensitive	m64023e_220409_165810_9831805_ccs	14340	gene						7081	8261	-	CC2S_00000290	PF00346	Respiratory-chain NADH dehydrogenase, 49 Kd subunit	sp|P0C337|NDHH_ORYSJ	ALOMY0G47042
CC2S	Sensitive	m64023e_220409_165810_83232412_ccs	13854	gene						9289	10428	-	CC2S_00000333	PF00346	Respiratory-chain NADH dehydrogenase, 49 Kd subunit	sp|P0C337|NDHH_ORYSJ	ALOMY0G47042
CC2S	Sensitive	m64023e_220409_165810_38338948_ccs	13470	gene						6443	7582	-	CC2S_00000367	PF00346	Respiratory-chain NADH dehydrogenase, 49 Kd subunit	sp|P0C337|NDHH_ORYSJ	ALOMY0G47042
CC2S	Sensitive	m64023e_220409_165810_33620127_ccs	12951	gene						4486	5443	+	CC2S_00000409	PF00346	Respiratory-chain NADH dehydrogenase, 49 Kd subunit	sp|P0C337|NDHH_ORYSJ	ALOMY0G47042
CC2S	Sensitive	m64023e_220409_165810_64881529_ccs	12930	gene						7207	8163	+	CC2S_00000417	PF00346	Respiratory-chain NADH dehydrogenase, 49 Kd subunit	sp|P0C337|NDHH_ORYSJ	ALOMY0G47042
CC2S	Sensitive	m64023e_220409_165810_13960562_ccs	12660	gene						6067	9358	+	CC2S_00000458	PF00346	Respiratory-chain NADH dehydrogenase, 49 Kd subunit	sp|P0C337|NDHH_ORYSJ	ALOMY0G47042
CC2S	Sensitive	m64023e_220409_165810_2492381_ccs	8721	gene						1030	4317	-	CC2S_00000878	PF00346	Respiratory-chain NADH dehydrogenase, 49 Kd subunit	sp|P0C337|NDHH_ORYSJ	ALOMY0G47042
CC2S	Sensitive	m64023e_220409_165810_161481303_ccs	2684	gene						1153	2292	-	CC2S_00001412	PF00346	Respiratory-chain NADH dehydrogenase, 49 Kd subunit	sp|P0C337|NDHH_ORYSJ	ALOMY0G47042
CC2S	Sensitive	m64023e_220409_165810_131992228_ccs	2100	gene						632	1201	-	CC2S_00001435	PF00346	Respiratory-chain NADH dehydrogenase, 49 Kd subunit	sp|P0C337|NDHH_ORYSJ	ALOMY0G47042
CC2S	Sensitive	m64023e_220409_165810_150274742_ccs	14580	gene						1255	1561	-	CC2S_00000224	PF00181	Ribosomal Proteins L2, RNA binding domain	sp|A6MMG4|RK2A_CHLSC	ALOMY0G47044
CC2S	Sensitive	m64023e_220409_165810_42534122_ccs	5460	gene						304	1005	-	CC2S_00001206	PF00181	Ribosomal Proteins L2, RNA binding domain	sp|A8Y9C8|RK2_LOLPR	ALOMY0G47044
CC2S	Sensitive	m64023e_220409_165810_125569610_ccs0	5340	gene						55	2358	-	CC2S_00001217	PF00177	Ribosomal protein S7p/S5e	sp|P0CC87|NU2C2_LOLPR	ALOMY0G47045
CC2S	Sensitive	m64023e_220409_165810_101778127_ccs	14040	gene						7919	11302	+	CC2S_00000318	PF00361	Proton-conducting membrane transporter	sp|A1EA56|NU5C_AGRST	ALOMY0G47048
CC2S	Sensitive	m64023e_220409_165810_159777465_ccs	11880	gene						3431	7858	-	CC2S_00000553	PF00361	Proton-conducting membrane transporter	sp|A1EA56|NU5C_AGRST	ALOMY0G47048
CC2S	Sensitive	m64023e_220409_165810_49152726_ccs	18891	gene						10561	14353	+	CC2S_00000046	PF01010	NADH-dehyrogenase subunit F, TMs, (complex I) C-terminus	sp|A8Y9D4|NU5C_LOLPR	ALOMY0G47048
CC2S	Sensitive	m64023e_220409_165810_83232412_ccs	13854	gene						10536	13604	-	CC2S_00000334	PF01010	NADH-dehyrogenase subunit F, TMs, (complex I) C-terminus	sp|A8Y9D4|NU5C_LOLPR	ALOMY0G47048
CC2S	Sensitive	m64023e_220409_165810_74910200_ccs	12690	gene						6605	7058	+	CC2S_00000448	PF01010	NADH-dehyrogenase subunit F, TMs, (complex I) C-terminus	sp|A8Y9D4|NU5C_LOLPR	ALOMY0G47048
CC2S	Sensitive	m64023e_220409_165810_7473678_ccs	11790	gene						1365	4625	+	CC2S_00000559	PF00662	NADH-Ubiquinone oxidoreductase (complex I), chain 5 N-terminus	sp|A8Y9D4|NU5C_LOLPR	ALOMY0G47048
CC2S	Sensitive	m64023e_220409_165810_107481113_ccs	15660	gene						881	5951	+	CC2S_00000168	PF00361	Proton-conducting membrane transporter	sp|A8Y9D4|NU5C_LOLPR	ALOMY0G47048
CC2S	Sensitive	m64023e_220409_165810_21890822_ccs	14524	gene						6609	10232	-	CC2S_00000240	PF00361	Proton-conducting membrane transporter	sp|A8Y9D4|NU5C_LOLPR	ALOMY0G47048
CC2S	Sensitive	m64023e_220409_165810_61344001_ccs	14430	gene						4948	8546	+	CC2S_00000265	PF00361	Proton-conducting membrane transporter	sp|A8Y9D4|NU5C_LOLPR	ALOMY0G47048
CC2S	Sensitive	m64023e_220409_165810_56952800_ccs	14400	gene						4138	7914	-	CC2S_00000279	PF00361	Proton-conducting membrane transporter	sp|A8Y9D4|NU5C_LOLPR	ALOMY0G47048
CC2S	Sensitive	m64023e_220409_165810_159255333_ccs	13710	gene						12	1627	-	CC2S_00000344	PF00361	Proton-conducting membrane transporter	sp|A8Y9D4|NU5C_LOLPR	ALOMY0G47048
CC2S	Sensitive	m64023e_220409_165810_144312462_ccs	13710	gene						7912	12059	-	CC2S_00000350	PF00361	Proton-conducting membrane transporter	sp|A8Y9D4|NU5C_LOLPR	ALOMY0G47048
CC2S	Sensitive	m64023e_220409_165810_33620127_ccs	12951	gene						2082	4279	+	CC2S_00000408	PF00361	Proton-conducting membrane transporter	sp|A8Y9D4|NU5C_LOLPR	ALOMY0G47048
CC2S	Sensitive	m64023e_220409_165810_64881529_ccs	12930	gene						2013	7054	+	CC2S_00000416	PF00361	Proton-conducting membrane transporter	sp|A8Y9D4|NU5C_LOLPR	ALOMY0G47048
CC2S	Sensitive	m64023e_220409_165810_13960562_ccs	12660	gene						4165	5992	+	CC2S_00000457	PF00361	Proton-conducting membrane transporter	sp|A8Y9D4|NU5C_LOLPR	ALOMY0G47048
CC2S	Sensitive	m64023e_220409_165810_28969563_ccs	12630	gene						6978	10049	-	CC2S_00000476	PF00361	Proton-conducting membrane transporter	sp|A8Y9D4|NU5C_LOLPR	ALOMY0G47048
CC2S	Sensitive	m64023e_220409_165810_395763_ccs	11700	gene						1920	4069	+	CC2S_00000572	PF00361	Proton-conducting membrane transporter	sp|A8Y9D4|NU5C_LOLPR	ALOMY0G47048
CC2S	Sensitive	m64023e_220409_165810_162072335_ccs	12697	gene						7657	10817	+	CC2S_00000444	PF00346	Respiratory-chain NADH dehydrogenase, 49 Kd subunit	sp|A8Y9D4|NU5C_LOLPR	ALOMY0G47048
CC2S	Sensitive	m64023e_220409_165810_11536164_ccs	11400	gene						5897	8951	-	CC2S_00000616			sp|A8Y9D4|NU5C_LOLPR	ALOMY0G47048
CC2S	Sensitive	m64023e_220409_165810_11536164_ccs	11400	gene						2211	5876	-	CC2S_00000615	PF00146	NADH dehydrogenase	sp|Q32880|NU5C_POAPR	ALOMY0G47048
CC2S	Sensitive	m64023e_220409_165810_81855675_ccs	15008	gene						248	5185	-	CC2S_00000199	PF01010	NADH-dehyrogenase subunit F, TMs, (complex I) C-terminus	sp|Q32880|NU5C_POAPR	ALOMY0G47048
CC2S	Sensitive	m64023e_220409_165810_111347307_ccs	16544	gene						252	5166	-	CC2S_00000131	PF00361	Proton-conducting membrane transporter	sp|Q32880|NU5C_POAPR	ALOMY0G47048
CC2S	Sensitive	m64023e_220409_165810_21890822_ccs	14524	gene						3737	6570	-	CC2S_00000239	PF00361	Proton-conducting membrane transporter	sp|Q32880|NU5C_POAPR	ALOMY0G47048
CC2S	Sensitive	m64023e_220409_165810_9831805_ccs	14340	gene						8330	13467	-	CC2S_00000291	PF00361	Proton-conducting membrane transporter	sp|Q32880|NU5C_POAPR	ALOMY0G47048
CC2S	Sensitive	m64023e_220409_165810_74910200_ccs	12690	gene						2011	6598	+	CC2S_00000447	PF00361	Proton-conducting membrane transporter	sp|Q32880|NU5C_POAPR	ALOMY0G47048
CC2S	Sensitive	m64023e_220409_165810_79168817_ccs	12390	gene						3672	9299	-	CC2S_00000493	PF00361	Proton-conducting membrane transporter	sp|Q32880|NU5C_POAPR	ALOMY0G47048
CC2S	Sensitive	m64023e_220409_165810_127993038_ccs	12129	gene						331	4539	+	CC2S_00000518	PF00361	Proton-conducting membrane transporter	sp|Q32880|NU5C_POAPR	ALOMY0G47048
CC2S	Sensitive	m64023e_220409_165810_103940392_ccs	11580	gene						3024	7834	+	CC2S_00000590	PF00361	Proton-conducting membrane transporter	sp|Q32880|NU5C_POAPR	ALOMY0G47048
CC2S	Sensitive	m64023e_220409_165810_115802908_ccs	11160	gene						35	3178	+	CC2S_00000644	PF00361	Proton-conducting membrane transporter	sp|Q32880|NU5C_POAPR	ALOMY0G47048
CC2S	Sensitive	m64023e_220409_165810_49152726_ccs	18891	gene						7605	8533	-	CC2S_00000045	PF01578	Cytochrome C assembly protein	sp|A1EA58|CCSA_AGRST	ALOMY0G47049
CC2S	Sensitive	m64023e_220409_165810_128320570_ccs	18861	gene						541	9137	-	CC2S_00000048	PF01578	Cytochrome C assembly protein	sp|A1EA58|CCSA_AGRST	ALOMY0G47049
CC2S	Sensitive	m64023e_220409_165810_61344001_ccs	14430	gene						1990	11908	-	CC2S_00000264	PF01578	Cytochrome C assembly protein	sp|A1EA58|CCSA_AGRST	ALOMY0G47049
CC2S	Sensitive	m64023e_220409_165810_22743891_ccs	14404	gene						885	11340	+	CC2S_00000270	PF01578	Cytochrome C assembly protein	sp|A1EA58|CCSA_AGRST	ALOMY0G47049
CC2S	Sensitive	m64023e_220409_165810_56952800_ccs	14400	gene						953	10843	+	CC2S_00000277	PF01578	Cytochrome C assembly protein	sp|A1EA58|CCSA_AGRST	ALOMY0G47049
CC2S	Sensitive	m64023e_220409_165810_9831805_ccs	14340	gene						7	498	+	CC2S_00000285	PF01578	Cytochrome C assembly protein	sp|A1EA58|CCSA_AGRST	ALOMY0G47049
CC2S	Sensitive	m64023e_220409_165810_101778127_ccs	14040	gene						4960	5889	-	CC2S_00000317	PF01578	Cytochrome C assembly protein	sp|A1EA58|CCSA_AGRST	ALOMY0G47049
CC2S	Sensitive	m64023e_220409_165810_83232412_ccs	13854	gene						2140	2710	+	CC2S_00000328	PF01578	Cytochrome C assembly protein	sp|A1EA58|CCSA_AGRST	ALOMY0G47049
CC2S	Sensitive	m64023e_220409_165810_144312462_ccs	13710	gene						405	1334	+	CC2S_00000345	PF01578	Cytochrome C assembly protein	sp|A1EA58|CCSA_AGRST	ALOMY0G47049
CC2S	Sensitive	m64023e_220409_165810_38338948_ccs	13470	gene						4339	13321	+	CC2S_00000366	PF01578	Cytochrome C assembly protein	sp|A1EA58|CCSA_AGRST	ALOMY0G47049
CC2S	Sensitive	m64023e_220409_165810_33620127_ccs	12951	gene						609	12789	-	CC2S_00000407	PF01578	Cytochrome C assembly protein	sp|A1EA58|CCSA_AGRST	ALOMY0G47049
CC2S	Sensitive	m64023e_220409_165810_64881529_ccs	12930	gene						1850	10270	-	CC2S_00000415	PF01578	Cytochrome C assembly protein	sp|A1EA58|CCSA_AGRST	ALOMY0G47049
CC2S	Sensitive	m64023e_220409_165810_162072335_ccs	12697	gene						4698	5627	-	CC2S_00000443	PF01578	Cytochrome C assembly protein	sp|A1EA58|CCSA_AGRST	ALOMY0G47049
CC2S	Sensitive	m64023e_220409_165810_13960562_ccs	12660	gene						1204	2133	-	CC2S_00000456	PF01578	Cytochrome C assembly protein	sp|A1EA58|CCSA_AGRST	ALOMY0G47049
CC2S	Sensitive	m64023e_220409_165810_158466332_ccs	12660	gene						4227	12402	+	CC2S_00000467	PF01578	Cytochrome C assembly protein	sp|A1EA58|CCSA_AGRST	ALOMY0G47049
CC2S	Sensitive	m64023e_220409_165810_28969563_ccs	12630	gene						12078	12629	+	CC2S_00000477	PF01578	Cytochrome C assembly protein	sp|A1EA58|CCSA_AGRST	ALOMY0G47049
CC2S	Sensitive	m64023e_220409_165810_127993038_ccs	12129	gene						67	11887	-	CC2S_00000517	PF01578	Cytochrome C assembly protein	sp|A1EA58|CCSA_AGRST	ALOMY0G47049
CC2S	Sensitive	m64023e_220409_165810_159777465_ccs	11880	gene						9888	10817	+	CC2S_00000554	PF01578	Cytochrome C assembly protein	sp|A1EA58|CCSA_AGRST	ALOMY0G47049
CC2S	Sensitive	m64023e_220409_165810_395763_ccs	11700	gene						59	11627	-	CC2S_00000571	PF01578	Cytochrome C assembly protein	sp|A1EA58|CCSA_AGRST	ALOMY0G47049
CC2S	Sensitive	m64023e_220409_165810_1180982_ccs	11670	gene						1901	2830	-	CC2S_00000579	PF01578	Cytochrome C assembly protein	sp|A1EA58|CCSA_AGRST	ALOMY0G47049
CC2S	Sensitive	m64023e_220409_165810_178586897_ccs	11550	gene						85	11543	+	CC2S_00000596	PF01578	Cytochrome C assembly protein	sp|A1EA58|CCSA_AGRST	ALOMY0G47049
CC2S	Sensitive	m64023e_220409_165810_115802908_ccs	11160	gene						9838	10602	-	CC2S_00000649	PF01578	Cytochrome C assembly protein	sp|A1EA58|CCSA_AGRST	ALOMY0G47049
CC2S	Sensitive	m64023e_220409_165810_88277824_ccs	7470	gene						633	7416	+	CC2S_00001007	PF01578	Cytochrome C assembly protein	sp|A1EA58|CCSA_AGRST	ALOMY0G47049
CC2S	Sensitive	m64023e_220409_165810_150013353_ccs01	6776	gene						100	6766	+	CC2S_00001107	PF01578	Cytochrome C assembly protein	sp|A1EA58|CCSA_AGRST	ALOMY0G47049
CC2S	Sensitive	m64023e_220409_165810_34668700_ccs	3564	gene						229	3519	-	CC2S_00001373	PF01578	Cytochrome C assembly protein	sp|A1EA58|CCSA_AGRST	ALOMY0G47049
CC2S	Sensitive	m64023e_220409_165810_112592877_ccs	2436	gene						1431	2360	-	CC2S_00001424	PF01578	Cytochrome C assembly protein	sp|A1EA58|CCSA_AGRST	ALOMY0G47049
CC2S	Sensitive	m64023e_220409_165810_115802908_ccs	11160	gene						8184	9686	+	CC2S_00000648	PF00361	Proton-conducting membrane transporter	sp|A1EA59|NU4C_AGRST	ALOMY0G47050
CC2S	Sensitive	m64023e_220409_165810_13960562_ccs	12660	gene						12312	12650	+	CC2S_00000461			sp|A8Y9D7|NU4C_LOLPR	ALOMY0G47050
CC2S	Sensitive	m64023e_220409_165810_7473678_ccs	11790	gene						11467	11697	+	CC2S_00000563			sp|A8Y9D7|NU4C_LOLPR	ALOMY0G47050
CC2S	Sensitive	m64023e_220409_165810_174983765_ccs	2640	gene						2459	2638	+	CC2S_00001418			sp|A8Y9D7|NU4C_LOLPR	ALOMY0G47050
CC2S	Sensitive	m64023e_220409_165810_111347307_ccs	16544	gene						5480	6044	-	CC2S_00000132	PF00361	Proton-conducting membrane transporter	sp|O03060|NU4C_HORVU	ALOMY0G47050
CC2S	Sensitive	m64023e_220409_165810_159777465_ccs	11880	gene						10970	11421	-	CC2S_00000555			sp|O03060|NU4C_HORVU	ALOMY0G47050
CC2S	Sensitive	m64023e_220409_165810_14484690_ccs	8310	gene						7983	8209	-	CC2S_00000919			sp|O03060|NU4C_HORVU	ALOMY0G47050
CC2S	Sensitive	m64023e_220409_165810_49152726_ccs	18891	gene						6092	7456	+	CC2S_00000044	PF00361	Proton-conducting membrane transporter	sp|P58420|NU4C_WHEAT	ALOMY0G47050
CC2S	Sensitive	m64023e_220409_165810_128320570_ccs	18861	gene						4967	6331	+	CC2S_00000050	PF00361	Proton-conducting membrane transporter	sp|P58420|NU4C_WHEAT	ALOMY0G47050
CC2S	Sensitive	m64023e_220409_165810_111347307_ccs	16544	gene						6065	6978	-	CC2S_00000133	PF00361	Proton-conducting membrane transporter	sp|P58420|NU4C_WHEAT	ALOMY0G47050
CC2S	Sensitive	m64023e_220409_165810_107481113_ccs	15660	gene						12062	13428	+	CC2S_00000173	PF00361	Proton-conducting membrane transporter	sp|P58420|NU4C_WHEAT	ALOMY0G47050
CC2S	Sensitive	m64023e_220409_165810_81855675_ccs	15008	gene						5500	7003	-	CC2S_00000200	PF00361	Proton-conducting membrane transporter	sp|P58420|NU4C_WHEAT	ALOMY0G47050
CC2S	Sensitive	m64023e_220409_165810_21890822_ccs	14524	gene						10547	11912	-	CC2S_00000241	PF00361	Proton-conducting membrane transporter	sp|P58420|NU4C_WHEAT	ALOMY0G47050
CC2S	Sensitive	m64023e_220409_165810_61344001_ccs	14430	gene						338	1838	+	CC2S_00000263	PF00361	Proton-conducting membrane transporter	sp|P58420|NU4C_WHEAT	ALOMY0G47050
CC2S	Sensitive	m64023e_220409_165810_22743891_ccs	14404	gene						2671	4035	-	CC2S_00000271	PF00361	Proton-conducting membrane transporter	sp|P58420|NU4C_WHEAT	ALOMY0G47050
CC2S	Sensitive	m64023e_220409_165810_56952800_ccs	14400	gene						11022	12386	-	CC2S_00000280	PF00361	Proton-conducting membrane transporter	sp|P58420|NU4C_WHEAT	ALOMY0G47050
CC2S	Sensitive	m64023e_220409_165810_9831805_ccs	14340	gene						653	2018	-	CC2S_00000286	PF00361	Proton-conducting membrane transporter	sp|P58420|NU4C_WHEAT	ALOMY0G47050
CC2S	Sensitive	m64023e_220409_165810_101778127_ccs	14040	gene						3310	4811	+	CC2S_00000316	PF00361	Proton-conducting membrane transporter	sp|P58420|NU4C_WHEAT	ALOMY0G47050
CC2S	Sensitive	m64023e_220409_165810_83232412_ccs	13854	gene						2859	4224	-	CC2S_00000329	PF00361	Proton-conducting membrane transporter	sp|P58420|NU4C_WHEAT	ALOMY0G47050
CC2S	Sensitive	m64023e_220409_165810_144312462_ccs	13710	gene						1562	2848	-	CC2S_00000346	PF00361	Proton-conducting membrane transporter	sp|P58420|NU4C_WHEAT	ALOMY0G47050
CC2S	Sensitive	m64023e_220409_165810_38338948_ccs	13470	gene						16	1380	-	CC2S_00000362	PF00361	Proton-conducting membrane transporter	sp|P58420|NU4C_WHEAT	ALOMY0G47050
CC2S	Sensitive	m64023e_220409_165810_33620127_ccs	12951	gene						10509	11873	+	CC2S_00000413	PF00361	Proton-conducting membrane transporter	sp|P58420|NU4C_WHEAT	ALOMY0G47050
CC2S	Sensitive	m64023e_220409_165810_64881529_ccs	12930	gene						334	1698	+	CC2S_00000414	PF00361	Proton-conducting membrane transporter	sp|P58420|NU4C_WHEAT	ALOMY0G47050
CC2S	Sensitive	m64023e_220409_165810_162072335_ccs	12697	gene						3185	4549	+	CC2S_00000442	PF00361	Proton-conducting membrane transporter	sp|P58420|NU4C_WHEAT	ALOMY0G47050
CC2S	Sensitive	m64023e_220409_165810_74910200_ccs	12690	gene						192	1695	+	CC2S_00000446	PF00361	Proton-conducting membrane transporter	sp|P58420|NU4C_WHEAT	ALOMY0G47050
CC2S	Sensitive	m64023e_220409_165810_13960562_ccs	12660	gene						12	1055	+	CC2S_00000455	PF00361	Proton-conducting membrane transporter	sp|P58420|NU4C_WHEAT	ALOMY0G47050
CC2S	Sensitive	m64023e_220409_165810_158466332_ccs	12660	gene						9	1405	-	CC2S_00000463	PF00361	Proton-conducting membrane transporter	sp|P58420|NU4C_WHEAT	ALOMY0G47050
CC2S	Sensitive	m64023e_220409_165810_28969563_ccs	12630	gene						546	2052	-	CC2S_00000472	PF00361	Proton-conducting membrane transporter	sp|P58420|NU4C_WHEAT	ALOMY0G47050
CC2S	Sensitive	m64023e_220409_165810_79168817_ccs	12390	gene						9613	11112	-	CC2S_00000494	PF00361	Proton-conducting membrane transporter	sp|P58420|NU4C_WHEAT	ALOMY0G47050
CC2S	Sensitive	m64023e_220409_165810_127993038_ccs	12129	gene						9468	10971	+	CC2S_00000522	PF00361	Proton-conducting membrane transporter	sp|P58420|NU4C_WHEAT	ALOMY0G47050
CC2S	Sensitive	m64023e_220409_165810_7473678_ccs	11790	gene						100	1050	+	CC2S_00000558	PF00361	Proton-conducting membrane transporter	sp|P58420|NU4C_WHEAT	ALOMY0G47050
CC2S	Sensitive	m64023e_220409_165810_395763_ccs	11700	gene						9136	10501	+	CC2S_00000576	PF00361	Proton-conducting membrane transporter	sp|P58420|NU4C_WHEAT	ALOMY0G47050
CC2S	Sensitive	m64023e_220409_165810_1180982_ccs	11670	gene						387	1752	+	CC2S_00000578	PF00361	Proton-conducting membrane transporter	sp|P58420|NU4C_WHEAT	ALOMY0G47050
CC2S	Sensitive	m64023e_220409_165810_103940392_ccs	11580	gene						1206	2709	+	CC2S_00000589	PF00361	Proton-conducting membrane transporter	sp|P58420|NU4C_WHEAT	ALOMY0G47050
CC2S	Sensitive	m64023e_220409_165810_178586897_ccs	11550	gene						1001	2502	-	CC2S_00000597	PF00361	Proton-conducting membrane transporter	sp|P58420|NU4C_WHEAT	ALOMY0G47050
CC2S	Sensitive	m64023e_220409_165810_11536164_ccs	11400	gene						9266	10630	-	CC2S_00000617	PF00361	Proton-conducting membrane transporter	sp|P58420|NU4C_WHEAT	ALOMY0G47050
CC2S	Sensitive	m64023e_220409_165810_14484690_ccs	8310	gene						42	1215	-	CC2S_00000915	PF00361	Proton-conducting membrane transporter	sp|P58420|NU4C_WHEAT	ALOMY0G47050
CC2S	Sensitive	m64023e_220409_165810_88277824_ccs	7470	gene						3770	5134	-	CC2S_00001008	PF00361	Proton-conducting membrane transporter	sp|P58420|NU4C_WHEAT	ALOMY0G47050
CC2S	Sensitive	m64023e_220409_165810_150013353_ccs01	6776	gene						1016	2380	-	CC2S_00001108	PF00361	Proton-conducting membrane transporter	sp|P58420|NU4C_WHEAT	ALOMY0G47050
CC2S	Sensitive	m64023e_220409_165810_22544590_ccs	4500	gene						1571	2487	-	CC2S_00001294	PF00361	Proton-conducting membrane transporter	sp|P58420|NU4C_WHEAT	ALOMY0G47050
CC2S	Sensitive	m64023e_220409_165810_146474961_ccs0	4170	gene						2112	4038	-	CC2S_00001324	PF00361	Proton-conducting membrane transporter	sp|P58420|NU4C_WHEAT	ALOMY0G47050
CC2S	Sensitive	m64023e_220409_165810_109051945_ccs	4140	gene						421	1785	+	CC2S_00001326	PF00361	Proton-conducting membrane transporter	sp|P58420|NU4C_WHEAT	ALOMY0G47050
CC2S	Sensitive	m64023e_220409_165810_174983765_ccs	2640	gene						50	1934	+	CC2S_00001417	PF00361	Proton-conducting membrane transporter	sp|P58420|NU4C_WHEAT	ALOMY0G47050
CC2S	Sensitive	m64023e_220409_165810_49152726_ccs	18891	gene						4040	5567	+	CC2S_00000043	PF00499	NADH-ubiquinone/plastoquinone oxidoreductase chain 6	sp|Q95H44|NU6C_WHEAT	ALOMY0G47051
CC2S	Sensitive	m64023e_220409_165810_111347307_ccs	16544	gene						7365	8890	-	CC2S_00000134	PF00499	NADH-ubiquinone/plastoquinone oxidoreductase chain 6	sp|Q95H44|NU6C_WHEAT	ALOMY0G47051
CC2S	Sensitive	m64023e_220409_165810_107481113_ccs	15660	gene						10015	11537	+	CC2S_00000172	PF00499	NADH-ubiquinone/plastoquinone oxidoreductase chain 6	sp|Q95H44|NU6C_WHEAT	ALOMY0G47051
CC2S	Sensitive	m64023e_220409_165810_81855675_ccs	15008	gene						7390	8915	-	CC2S_00000201	PF00499	NADH-ubiquinone/plastoquinone oxidoreductase chain 6	sp|Q95H44|NU6C_WHEAT	ALOMY0G47051
CC2S	Sensitive	m64023e_220409_165810_21890822_ccs	14524	gene						12437	13962	-	CC2S_00000242	PF00499	NADH-ubiquinone/plastoquinone oxidoreductase chain 6	sp|Q95H44|NU6C_WHEAT	ALOMY0G47051
CC2S	Sensitive	m64023e_220409_165810_61344001_ccs	14430	gene						12817	14342	+	CC2S_00000269	PF00499	NADH-ubiquinone/plastoquinone oxidoreductase chain 6	sp|Q95H44|NU6C_WHEAT	ALOMY0G47051
CC2S	Sensitive	m64023e_220409_165810_22743891_ccs	14404	gene						4560	6085	-	CC2S_00000272	PF00499	NADH-ubiquinone/plastoquinone oxidoreductase chain 6	sp|Q95H44|NU6C_WHEAT	ALOMY0G47051
CC2S	Sensitive	m64023e_220409_165810_56952800_ccs	14400	gene						12914	14370	-	CC2S_00000281	PF00499	NADH-ubiquinone/plastoquinone oxidoreductase chain 6	sp|Q95H44|NU6C_WHEAT	ALOMY0G47051
CC2S	Sensitive	m64023e_220409_165810_9831805_ccs	14340	gene						2542	4067	-	CC2S_00000287	PF00499	NADH-ubiquinone/plastoquinone oxidoreductase chain 6	sp|Q95H44|NU6C_WHEAT	ALOMY0G47051
CC2S	Sensitive	m64023e_220409_165810_101778127_ccs	14040	gene						1398	2923	+	CC2S_00000315	PF00499	NADH-ubiquinone/plastoquinone oxidoreductase chain 6	sp|Q95H44|NU6C_WHEAT	ALOMY0G47051
CC2S	Sensitive	m64023e_220409_165810_83232412_ccs	13854	gene						4748	6274	-	CC2S_00000330	PF00499	NADH-ubiquinone/plastoquinone oxidoreductase chain 6	sp|Q95H44|NU6C_WHEAT	ALOMY0G47051
CC2S	Sensitive	m64023e_220409_165810_144312462_ccs	13710	gene						3372	4898	-	CC2S_00000347	PF00499	NADH-ubiquinone/plastoquinone oxidoreductase chain 6	sp|Q95H44|NU6C_WHEAT	ALOMY0G47051
CC2S	Sensitive	m64023e_220409_165810_38338948_ccs	13470	gene						1905	3430	-	CC2S_00000363	PF00499	NADH-ubiquinone/plastoquinone oxidoreductase chain 6	sp|Q95H44|NU6C_WHEAT	ALOMY0G47051
CC2S	Sensitive	m64023e_220409_165810_33620127_ccs	12951	gene						8456	9984	+	CC2S_00000412	PF00499	NADH-ubiquinone/plastoquinone oxidoreductase chain 6	sp|Q95H44|NU6C_WHEAT	ALOMY0G47051
CC2S	Sensitive	m64023e_220409_165810_64881529_ccs	12930	gene						11180	12705	+	CC2S_00000419	PF00499	NADH-ubiquinone/plastoquinone oxidoreductase chain 6	sp|Q95H44|NU6C_WHEAT	ALOMY0G47051
CC2S	Sensitive	m64023e_220409_165810_162072335_ccs	12697	gene						1135	2660	+	CC2S_00000441	PF00499	NADH-ubiquinone/plastoquinone oxidoreductase chain 6	sp|Q95H44|NU6C_WHEAT	ALOMY0G47051
CC2S	Sensitive	m64023e_220409_165810_74910200_ccs	12690	gene						10948	12475	+	CC2S_00000451	PF00499	NADH-ubiquinone/plastoquinone oxidoreductase chain 6	sp|Q95H44|NU6C_WHEAT	ALOMY0G47051
CC2S	Sensitive	m64023e_220409_165810_13960562_ccs	12660	gene						10261	11787	+	CC2S_00000460	PF00499	NADH-ubiquinone/plastoquinone oxidoreductase chain 6	sp|Q95H44|NU6C_WHEAT	ALOMY0G47051
CC2S	Sensitive	m64023e_220409_165810_158466332_ccs	12660	gene						1792	3318	-	CC2S_00000464	PF00499	NADH-ubiquinone/plastoquinone oxidoreductase chain 6	sp|Q95H44|NU6C_WHEAT	ALOMY0G47051
CC2S	Sensitive	m64023e_220409_165810_28969563_ccs	12630	gene						2439	3964	-	CC2S_00000473	PF00499	NADH-ubiquinone/plastoquinone oxidoreductase chain 6	sp|Q95H44|NU6C_WHEAT	ALOMY0G47051
CC2S	Sensitive	m64023e_220409_165810_79168817_ccs	12390	gene						200	661	-	CC2S_00000490	PF00499	NADH-ubiquinone/plastoquinone oxidoreductase chain 6	sp|Q95H44|NU6C_WHEAT	ALOMY0G47051
CC2S	Sensitive	m64023e_220409_165810_127993038_ccs	12129	gene						7556	9081	+	CC2S_00000521	PF00499	NADH-ubiquinone/plastoquinone oxidoreductase chain 6	sp|Q95H44|NU6C_WHEAT	ALOMY0G47051
CC2S	Sensitive	m64023e_220409_165810_159777465_ccs	11880	gene						1004	2529	-	CC2S_00000551	PF00499	NADH-ubiquinone/plastoquinone oxidoreductase chain 6	sp|Q95H44|NU6C_WHEAT	ALOMY0G47051
CC2S	Sensitive	m64023e_220409_165810_7473678_ccs	11790	gene						9417	10942	+	CC2S_00000562	PF00499	NADH-ubiquinone/plastoquinone oxidoreductase chain 6	sp|Q95H44|NU6C_WHEAT	ALOMY0G47051
CC2S	Sensitive	m64023e_220409_165810_1180982_ccs	11670	gene						9989	11514	+	CC2S_00000583	PF00499	NADH-ubiquinone/plastoquinone oxidoreductase chain 6	sp|Q95H44|NU6C_WHEAT	ALOMY0G47051
CC2S	Sensitive	m64023e_220409_165810_103940392_ccs	11580	gene						10852	11355	+	CC2S_00000593	PF00499	NADH-ubiquinone/plastoquinone oxidoreductase chain 6	sp|Q95H44|NU6C_WHEAT	ALOMY0G47051
CC2S	Sensitive	m64023e_220409_165810_178586897_ccs	11550	gene						2889	4414	-	CC2S_00000598	PF00499	NADH-ubiquinone/plastoquinone oxidoreductase chain 6	sp|Q95H44|NU6C_WHEAT	ALOMY0G47051
CC2S	Sensitive	m64023e_220409_165810_115802908_ccs	11160	gene						6272	7797	+	CC2S_00000647	PF00499	NADH-ubiquinone/plastoquinone oxidoreductase chain 6	sp|Q95H44|NU6C_WHEAT	ALOMY0G47051
CC2S	Sensitive	m64023e_220409_165810_14484690_ccs	8310	gene						1602	3126	-	CC2S_00000916	PF00499	NADH-ubiquinone/plastoquinone oxidoreductase chain 6	sp|Q95H44|NU6C_WHEAT	ALOMY0G47051
CC2S	Sensitive	m64023e_220409_165810_88277824_ccs	7470	gene						5660	7186	-	CC2S_00001009	PF00499	NADH-ubiquinone/plastoquinone oxidoreductase chain 6	sp|Q95H44|NU6C_WHEAT	ALOMY0G47051
CC2S	Sensitive	m64023e_220409_165810_150013353_ccs01	6776	gene						2905	4430	-	CC2S_00001109	PF00499	NADH-ubiquinone/plastoquinone oxidoreductase chain 6	sp|Q95H44|NU6C_WHEAT	ALOMY0G47051
CC2S	Sensitive	m64023e_220409_165810_162334190_ccs	4770	gene						99	1625	+	CC2S_00001269	PF00499	NADH-ubiquinone/plastoquinone oxidoreductase chain 6	sp|Q95H44|NU6C_WHEAT	ALOMY0G47051
CC2S	Sensitive	m64023e_220409_165810_22544590_ccs	4500	gene						2874	4399	-	CC2S_00001295	PF00499	NADH-ubiquinone/plastoquinone oxidoreductase chain 6	sp|Q95H44|NU6C_WHEAT	ALOMY0G47051
CC2S	Sensitive	m64023e_220409_165810_146474961_ccs0	4170	gene						547	2072	-	CC2S_00001323	PF00499	NADH-ubiquinone/plastoquinone oxidoreductase chain 6	sp|Q95H44|NU6C_WHEAT	ALOMY0G47051
CC2S	Sensitive	m64023e_220409_165810_109051945_ccs	4140	gene						2502	4029	+	CC2S_00001327	PF00499	NADH-ubiquinone/plastoquinone oxidoreductase chain 6	sp|Q95H44|NU6C_WHEAT	ALOMY0G47051
CC2S	Sensitive	m64023e_220409_165810_395763_ccs	11700	gene						7087	8611	+	CC2S_00000575			sp|Q95H44|NU6C_WHEAT	ALOMY0G47051
CC2S	Sensitive	m64023e_220409_165810_111347307_ccs	16544	gene						8926	9699	-	CC2S_00000135	PF13237	4Fe-4S dicluster domain	sp|A1EA63|NDHI_AGRST	ALOMY0G47052
CC2S	Sensitive	m64023e_220409_165810_107481113_ccs	15660	gene						9204	9978	+	CC2S_00000171	PF13237	4Fe-4S dicluster domain	sp|A1EA63|NDHI_AGRST	ALOMY0G47052
CC2S	Sensitive	m64023e_220409_165810_81855675_ccs	15008	gene						8952	9725	-	CC2S_00000202	PF13237	4Fe-4S dicluster domain	sp|A1EA63|NDHI_AGRST	ALOMY0G47052
CC2S	Sensitive	m64023e_220409_165810_61344001_ccs	14430	gene						12007	12780	+	CC2S_00000268	PF13237	4Fe-4S dicluster domain	sp|A1EA63|NDHI_AGRST	ALOMY0G47052
CC2S	Sensitive	m64023e_220409_165810_22743891_ccs	14404	gene						6122	6896	-	CC2S_00000273	PF13237	4Fe-4S dicluster domain	sp|A1EA63|NDHI_AGRST	ALOMY0G47052
CC2S	Sensitive	m64023e_220409_165810_9831805_ccs	14340	gene						4104	4876	-	CC2S_00000288	PF13237	4Fe-4S dicluster domain	sp|A1EA63|NDHI_AGRST	ALOMY0G47052
CC2S	Sensitive	m64023e_220409_165810_101778127_ccs	14040	gene						588	1361	+	CC2S_00000314	PF13237	4Fe-4S dicluster domain	sp|A1EA63|NDHI_AGRST	ALOMY0G47052
CC2S	Sensitive	m64023e_220409_165810_83232412_ccs	13854	gene						6310	7083	-	CC2S_00000331	PF13237	4Fe-4S dicluster domain	sp|A1EA63|NDHI_AGRST	ALOMY0G47052
CC2S	Sensitive	m64023e_220409_165810_144312462_ccs	13710	gene						4935	5708	-	CC2S_00000348	PF13237	4Fe-4S dicluster domain	sp|A1EA63|NDHI_AGRST	ALOMY0G47052
CC2S	Sensitive	m64023e_220409_165810_38338948_ccs	13470	gene						3467	4240	-	CC2S_00000364	PF13237	4Fe-4S dicluster domain	sp|A1EA63|NDHI_AGRST	ALOMY0G47052
CC2S	Sensitive	m64023e_220409_165810_33620127_ccs	12951	gene						7647	8419	+	CC2S_00000411	PF13237	4Fe-4S dicluster domain	sp|A1EA63|NDHI_AGRST	ALOMY0G47052
CC2S	Sensitive	m64023e_220409_165810_64881529_ccs	12930	gene						10369	11143	+	CC2S_00000418	PF13237	4Fe-4S dicluster domain	sp|A1EA63|NDHI_AGRST	ALOMY0G47052
CC2S	Sensitive	m64023e_220409_165810_162072335_ccs	12697	gene						324	1098	+	CC2S_00000440	PF13237	4Fe-4S dicluster domain	sp|A1EA63|NDHI_AGRST	ALOMY0G47052
CC2S	Sensitive	m64023e_220409_165810_74910200_ccs	12690	gene						10138	10911	+	CC2S_00000450	PF13237	4Fe-4S dicluster domain	sp|A1EA63|NDHI_AGRST	ALOMY0G47052
CC2S	Sensitive	m64023e_220409_165810_158466332_ccs	12660	gene						3355	4128	-	CC2S_00000465	PF13237	4Fe-4S dicluster domain	sp|A1EA63|NDHI_AGRST	ALOMY0G47052
CC2S	Sensitive	m64023e_220409_165810_28969563_ccs	12630	gene						4001	4775	-	CC2S_00000474	PF13237	4Fe-4S dicluster domain	sp|A1EA63|NDHI_AGRST	ALOMY0G47052
CC2S	Sensitive	m64023e_220409_165810_79168817_ccs	12390	gene						698	1472	-	CC2S_00000491	PF13237	4Fe-4S dicluster domain	sp|A1EA63|NDHI_AGRST	ALOMY0G47052
CC2S	Sensitive	m64023e_220409_165810_127993038_ccs	12129	gene						6746	7519	+	CC2S_00000520	PF13237	4Fe-4S dicluster domain	sp|A1EA63|NDHI_AGRST	ALOMY0G47052
CC2S	Sensitive	m64023e_220409_165810_159777465_ccs	11880	gene						2566	3339	-	CC2S_00000552	PF13237	4Fe-4S dicluster domain	sp|A1EA63|NDHI_AGRST	ALOMY0G47052
CC2S	Sensitive	m64023e_220409_165810_7473678_ccs	11790	gene						8606	9380	+	CC2S_00000561	PF13237	4Fe-4S dicluster domain	sp|A1EA63|NDHI_AGRST	ALOMY0G47052
CC2S	Sensitive	m64023e_220409_165810_1180982_ccs	11670	gene						9179	9952	+	CC2S_00000582	PF13237	4Fe-4S dicluster domain	sp|A1EA63|NDHI_AGRST	ALOMY0G47052
CC2S	Sensitive	m64023e_220409_165810_178586897_ccs	11550	gene						4451	5225	-	CC2S_00000599	PF13237	4Fe-4S dicluster domain	sp|A1EA63|NDHI_AGRST	ALOMY0G47052
CC2S	Sensitive	m64023e_220409_165810_115802908_ccs	11160	gene						5462	6235	+	CC2S_00000646	PF13237	4Fe-4S dicluster domain	sp|A1EA63|NDHI_AGRST	ALOMY0G47052
CC2S	Sensitive	m64023e_220409_165810_150013353_ccs01	6776	gene						4470	5242	-	CC2S_00001110	PF13237	4Fe-4S dicluster domain	sp|A1EA63|NDHI_AGRST	ALOMY0G47052
CC2S	Sensitive	m64023e_220409_165810_128320570_ccs	18861	gene						2111	4442	+	CC2S_00000049	PF00499	NADH-ubiquinone/plastoquinone oxidoreductase chain 6	sp|A1EA63|NDHI_AGRST	ALOMY0G47052
CC2S	Sensitive	m64023e_220409_165810_13960562_ccs	12660	gene						9450	10224	+	CC2S_00000459	PF00037	4Fe-4S binding domain	sp|P05312|NDHI_WHEAT	ALOMY0G47052
CC2S	Sensitive	m64023e_220409_165810_14484690_ccs	8310	gene						3163	3936	-	CC2S_00000917	PF00037	4Fe-4S binding domain	sp|P05312|NDHI_WHEAT	ALOMY0G47052
CC2S	Sensitive	m64023e_220409_165810_22544590_ccs	4500	gene						47	725	-	CC2S_00001292	PF00037	4Fe-4S binding domain	sp|P05312|NDHI_WHEAT	ALOMY0G47052
CC2S	Sensitive	m64023e_220409_165810_395763_ccs	11700	gene						6282	7050	+	CC2S_00000574	PF13237	4Fe-4S dicluster domain	sp|P05312|NDHI_WHEAT	ALOMY0G47052
CC2S	Sensitive	m64023e_220409_165810_103940392_ccs	11580	gene						10040	10815	+	CC2S_00000592	PF13187	4Fe-4S dicluster domain	sp|P05312|NDHI_WHEAT	ALOMY0G47052
CC2S	Sensitive	m64023e_220409_165810_2492381_ccs	8721	gene						540	938	-	CC2S_00000877	PF13237	4Fe-4S dicluster domain	sp|P05312|NDHI_WHEAT	ALOMY0G47052
CC2S	Sensitive	m64023e_220409_165810_88277824_ccs	7470	gene						136	534	-	CC2S_00001006	PF13237	4Fe-4S dicluster domain	sp|P05312|NDHI_WHEAT	ALOMY0G47052
CC2S	Sensitive	m64023e_220409_165810_162334190_ccs	4770	gene						4058	4456	+	CC2S_00001271	PF13237	4Fe-4S dicluster domain	sp|P05312|NDHI_WHEAT	ALOMY0G47052
CC2S	Sensitive	m64023e_220409_165810_11536164_ccs	11400	gene						315	2119	-	CC2S_00000614	PF00499	NADH-ubiquinone/plastoquinone oxidoreductase chain 6	sp|P05312|NDHI_WHEAT	ALOMY0G47052
CC2S	Sensitive	m64023e_220409_165810_49152726_ccs	18891	gene						1031	3909	+	CC2S_00000042	PF00146	NADH dehydrogenase	sp|A1EA64|NU1C_AGRST	ALOMY0G47053
CC2S	Sensitive	m64023e_220409_165810_128320570_ccs	18861	gene						1	2015	+	CC2S_00000047	PF00146	NADH dehydrogenase	sp|A1EA64|NU1C_AGRST	ALOMY0G47053
CC2S	Sensitive	m64023e_220409_165810_111347307_ccs	16544	gene						9791	12270	-	CC2S_00000136	PF00146	NADH dehydrogenase	sp|A1EA64|NU1C_AGRST	ALOMY0G47053
CC2S	Sensitive	m64023e_220409_165810_107481113_ccs	15660	gene						7004	9112	+	CC2S_00000170	PF00146	NADH dehydrogenase	sp|A1EA64|NU1C_AGRST	ALOMY0G47053
CC2S	Sensitive	m64023e_220409_165810_81855675_ccs	15008	gene						9817	11927	-	CC2S_00000203	PF00146	NADH dehydrogenase	sp|A1EA64|NU1C_AGRST	ALOMY0G47053
CC2S	Sensitive	m64023e_220409_165810_21890822_ccs	14524	gene						32	2478	-	CC2S_00000237	PF00146	NADH dehydrogenase	sp|A1EA64|NU1C_AGRST	ALOMY0G47053
CC2S	Sensitive	m64023e_220409_165810_61344001_ccs	14430	gene						9805	11915	+	CC2S_00000267	PF00146	NADH dehydrogenase	sp|A1EA64|NU1C_AGRST	ALOMY0G47053
CC2S	Sensitive	m64023e_220409_165810_22743891_ccs	14404	gene						6988	9100	-	CC2S_00000274	PF00146	NADH dehydrogenase	sp|A1EA64|NU1C_AGRST	ALOMY0G47053
CC2S	Sensitive	m64023e_220409_165810_56952800_ccs	14400	gene						82	3057	-	CC2S_00000276	PF00146	NADH dehydrogenase	sp|A1EA64|NU1C_AGRST	ALOMY0G47053
CC2S	Sensitive	m64023e_220409_165810_9831805_ccs	14340	gene						4968	7079	-	CC2S_00000289	PF00146	NADH dehydrogenase	sp|A1EA64|NU1C_AGRST	ALOMY0G47053
CC2S	Sensitive	m64023e_220409_165810_101778127_ccs	14040	gene						12027	12956	+	CC2S_00000319	PF00146	NADH dehydrogenase	sp|A1EA64|NU1C_AGRST	ALOMY0G47053
CC2S	Sensitive	m64023e_220409_165810_83232412_ccs	13854	gene						7175	9287	-	CC2S_00000332	PF00146	NADH dehydrogenase	sp|A1EA64|NU1C_AGRST	ALOMY0G47053
CC2S	Sensitive	m64023e_220409_165810_144312462_ccs	13710	gene						5800	7910	-	CC2S_00000349	PF00146	NADH dehydrogenase	sp|A1EA64|NU1C_AGRST	ALOMY0G47053
CC2S	Sensitive	m64023e_220409_165810_38338948_ccs	13470	gene						4332	6441	-	CC2S_00000365	PF00146	NADH dehydrogenase	sp|A1EA64|NU1C_AGRST	ALOMY0G47053
CC2S	Sensitive	m64023e_220409_165810_33620127_ccs	12951	gene						5445	7555	+	CC2S_00000410	PF00146	NADH dehydrogenase	sp|A1EA64|NU1C_AGRST	ALOMY0G47053
CC2S	Sensitive	m64023e_220409_165810_162072335_ccs	12697	gene						10819	12669	+	CC2S_00000445	PF00146	NADH dehydrogenase	sp|A1EA64|NU1C_AGRST	ALOMY0G47053
CC2S	Sensitive	m64023e_220409_165810_158466332_ccs	12660	gene						4220	6331	-	CC2S_00000466	PF00146	NADH dehydrogenase	sp|A1EA64|NU1C_AGRST	ALOMY0G47053
CC2S	Sensitive	m64023e_220409_165810_28969563_ccs	12630	gene						4867	6976	-	CC2S_00000475	PF00146	NADH dehydrogenase	sp|A1EA64|NU1C_AGRST	ALOMY0G47053
CC2S	Sensitive	m64023e_220409_165810_79168817_ccs	12390	gene						1564	3670	-	CC2S_00000492	PF00146	NADH dehydrogenase	sp|A1EA64|NU1C_AGRST	ALOMY0G47053
CC2S	Sensitive	m64023e_220409_165810_127993038_ccs	12129	gene						4544	6654	+	CC2S_00000519	PF00146	NADH dehydrogenase	sp|A1EA64|NU1C_AGRST	ALOMY0G47053
CC2S	Sensitive	m64023e_220409_165810_7473678_ccs	11790	gene						6398	8514	+	CC2S_00000560	PF00146	NADH dehydrogenase	sp|A1EA64|NU1C_AGRST	ALOMY0G47053
CC2S	Sensitive	m64023e_220409_165810_395763_ccs	11700	gene						4074	6184	+	CC2S_00000573	PF00146	NADH dehydrogenase	sp|A1EA64|NU1C_AGRST	ALOMY0G47053
CC2S	Sensitive	m64023e_220409_165810_1180982_ccs	11670	gene						6977	9087	+	CC2S_00000581	PF00146	NADH dehydrogenase	sp|A1EA64|NU1C_AGRST	ALOMY0G47053
CC2S	Sensitive	m64023e_220409_165810_103940392_ccs	11580	gene						7836	9948	+	CC2S_00000591	PF00146	NADH dehydrogenase	sp|A1EA64|NU1C_AGRST	ALOMY0G47053
CC2S	Sensitive	m64023e_220409_165810_115802908_ccs	11160	gene						3260	5370	+	CC2S_00000645	PF00146	NADH dehydrogenase	sp|A1EA64|NU1C_AGRST	ALOMY0G47053
CC2S	Sensitive	m64023e_220409_165810_162334190_ccs	4770	gene						1805	3966	+	CC2S_00001270	PF00146	NADH dehydrogenase	sp|A1EA64|NU1C_AGRST	ALOMY0G47053
CC2S	Sensitive	m64023e_220409_165810_178586897_ccs	11550	gene						5320	11021	-	CC2S_00000600	PF00361	Proton-conducting membrane transporter	sp|A1EA64|NU1C_AGRST	ALOMY0G47053
CC2S	Sensitive	m64023e_220409_165810_74910200_ccs	12690	gene						7116	10046	+	CC2S_00000449	PF00346	Respiratory-chain NADH dehydrogenase, 49 Kd subunit	sp|A1EA64|NU1C_AGRST	ALOMY0G47053
CC2S	Sensitive	m64023e_220409_165810_150274742_ccs	14580	gene						9192	9503	+	CC2S_00000229				ALOMY0G47054
CC2S	Sensitive	m64023e_220409_165810_16515415_ccs	9003	gene						3106	3441	-	CC2S_00000850				ALOMY0G47054
CC2S	Sensitive	m64023e_220409_165810_67568582_ccs	10669	gene						7670	8128	-	CC2S_00000684	PF00125	Core histone H2A/H2B/H3/H4	sp|P05621|H2B2_WHEAT	ALOMY0G47128
CC2S	Sensitive	m64023e_220409_165810_178783252_ccs	8607	gene						1291	1509	+	CC2S_00000887				ALOMY0G47246
CC2S	Sensitive	m64023e_220409_165810_38406622_ccs0	10020	gene						7945	9575	-	CC2S_00000744	PF00891	O-methyltransferase domain	sp|A8QW53|OMT3_SORBI	ALOMY0G47260
CC2S	Sensitive	m64023e_220409_165810_38406622_ccs01	7886	gene						1188	3321	-	CC2S_00000964	PF00891	O-methyltransferase domain	sp|Q6EPG8|ASMT1_ORYSJ	ALOMY0G47260
CC2S	Sensitive	m64023e_220409_165810_98960259_ccs	10755	gene						1634	2033	-	CC2S_00000671	PF02419	PsbL protein	sp|A8Y999|CYF_LOLPR	ALOMY0G47274
CC2S	Sensitive	m64023e_220409_165810_83757149_ccs	5580	gene						2099	2638	-	CC2S_00001194	PF00283	Cytochrome b559, alpha (gene psbE) and beta (gene psbF)subunits	sp|Q5SD42|PSBF_HUPLU	ALOMY0G47274
CC2S	Sensitive	m64023e_220409_165810_62260783_ccs	10682	gene						167	458	-	CC2S_00000678	PF02419	PsbL protein	sp|Q67H84|PSBL_YUCGL	ALOMY0G47274
CC2S	Sensitive	m64023e_220409_165810_53084648_ccs	14370	gene						8247	9698	+	CC2S_00000284	PF02419	PsbL protein	sp|Q7IW42|PSBL_ZAMFU	ALOMY0G47274
CC2S	Sensitive	m64023e_220409_165810_120588529_ccs	14070	gene						6652	9267	-	CC2S_00000308	PF02419	PsbL protein	sp|Q7IW42|PSBL_ZAMFU	ALOMY0G47274
CC2S	Sensitive	m64023e_220409_165810_87163049_ccs	14040	gene						12653	13211	-	CC2S_00000312	PF02419	PsbL protein	sp|Q7IW42|PSBL_ZAMFU	ALOMY0G47274
CC2S	Sensitive	m64023e_220409_165810_126944446_ccs	12390	gene						6641	7199	-	CC2S_00000497	PF02419	PsbL protein	sp|Q7IW42|PSBL_ZAMFU	ALOMY0G47274
CC2S	Sensitive	m64023e_220409_165810_59508232_ccs	9180	gene						5182	5740	-	CC2S_00000839	PF02419	PsbL protein	sp|Q7IW42|PSBL_ZAMFU	ALOMY0G47274
CC2S	Sensitive	m64023e_220409_165810_35455377_ccs01	4530	gene						2071	2629	-	CC2S_00001289	PF02419	PsbL protein	sp|Q7IW42|PSBL_ZAMFU	ALOMY0G47274
CC2S	Sensitive	m64023e_220409_165810_35455377_ccs0	4493	gene						3246	3804	-	CC2S_00001297	PF02419	PsbL protein	sp|Q7IW42|PSBL_ZAMFU	ALOMY0G47274
CC2S	Sensitive	m64023e_220409_165810_48824398_ccs	3720	gene						765	3587	+	CC2S_00001358				ALOMY0G47344
CC2S	Sensitive	m64023e_220409_165810_95357615_ccs0	5070	gene						2153	2782	+	CC2S_00001242	PF00450	Serine carboxypeptidase	sp|Q2V465|SCP11_ARATH	ALOMY0G47386
CC2S	Sensitive	m64023e_220409_165810_95357615_ccs01	2458	gene						1	318	+	CC2S_00001423	PF00450	Serine carboxypeptidase	sp|Q9C7D6|SCP17_ARATH	ALOMY0G47386
CC2S	Sensitive	m64023e_220409_165810_8456476_ccs01	21948	gene						4410	5411	+	CC2S_00000017	PF00561	alpha/beta hydrolase fold		ALOMY0G47485
CC2S	Sensitive	m64023e_220409_165810_8456476_ccs01	21948	gene						4083	4316	+	CC2S_00000016				ALOMY0G47485
CC2S	Sensitive	m64023e_220409_165810_46728568_ccs	7530	gene						178	372	-	CC2S_00001002				ALOMY0G47673
CC2S	Sensitive	m64023e_220409_165810_25299089_ccs	9450	gene						990	4111	-	CC2S_00000810			sp|P0C8Z0|Y8359_ORYSI	ALOMY0G47763
CC2S	Sensitive	m64023e_220409_165810_22611553_ccs	1348	gene						2	757	+	CC2S_00001454	PF00318	Ribosomal protein S2	sp|Q9GCB9|RT02_ARATH	ALOMY0G47835
CC2S	Sensitive	m64023e_220409_165810_124321798_ccs	19710	gene						8397	8953	+	CC2S_00000033	PF04043	Plant invertase/pectin methylesterase inhibitor		ALOMY0G47966
CC2S	Sensitive	m64023e_220409_165810_42336401_ccs	16230	gene						11766	12314	-	CC2S_00000149	PF04043	Plant invertase/pectin methylesterase inhibitor		ALOMY0G47966
CC2S	Sensitive	m64023e_220409_165810_120785000_ccs	9330	gene						2172	2720	-	CC2S_00000821	PF04043	Plant invertase/pectin methylesterase inhibitor		ALOMY0G47966
CC2S	Sensitive	m64023e_220409_165810_87295388_ccs	6104	gene						3192	5223	-	CC2S_00001156	PF00146	NADH dehydrogenase	sp|P08834|NU1M_CITLA	ALOMY0G47978
CC2S	Sensitive	m64023e_220409_165810_109249186_ccs	6723	gene						3655	3942	+	CC2S_00001112	PF00416	Ribosomal protein S13/S18	sp|P07924|RT13_WHEAT	ALOMY0G47979
CC2S	Sensitive	m64023e_220409_165810_15664144_ccs	7470	gene						5995	7436	-	CC2S_00001010				ALOMY0G48067
CC2S	Sensitive	m64023e_220409_165810_123799985_ccs01	5313	gene						1795	3070	+	CC2S_00001224				ALOMY0G48067
CC2S	Sensitive	m64023e_220409_165810_62851507_ccs	5310	gene						945	1827	+	CC2S_00001226				ALOMY0G48067
CC2S	Sensitive	m64023e_220409_165810_99420877_ccs	5610	gene						498	2154	+	CC2S_00001190				ALOMY0G48097
CC2S	Sensitive	m64023e_220409_165810_104661792_ccs	14515	gene						4457	4919	+	CC2S_00000244				ALOMY0G48164
CC2S	Sensitive	m64023e_220409_165810_99093274_ccs	12030	gene						2277	4347	+	CC2S_00000531				ALOMY0G48176		CC5
CC2S	Sensitive	m64023e_220409_165810_45941612_ccs	15990	gene						1779	5782	-	CC2S_00000160				ALOMY0G48206
CC2S	Sensitive	m64023e_220409_165810_177014888_ccs	4117	gene						798	1960	-	CC2S_00001330				ALOMY0G48257
CC2S	Sensitive	m64023e_220409_165810_23792472_ccs01	16610	gene						8909	9726	-	CC2S_00000128				ALOMY0G48348
CC2S	Sensitive	m64023e_220409_165810_11339560_ccs	6822	gene						5265	6143	-	CC2S_00001098				ALOMY0G48427
CC2S	Sensitive	m64023e_220409_165810_64161136_ccs	11250	gene						1899	3248	+	CC2S_00000632				ALOMY0G48485
CC2S	Sensitive	m64023e_220409_165810_97127094_ccs	3870	gene						1469	2017	+	CC2S_00001343	PF04043	Plant invertase/pectin methylesterase inhibitor		ALOMY0G48557
CC2S	Sensitive	m64023e_220409_165810_168100205_ccs	7563	gene						5195	5500	+	CC2S_00000998				ALOMY0G48767
CC2S	Sensitive	m64023e_220409_165810_110233498_ccs0101	1559	gene						1231	1380	-	CC2S_00001449				ALOMY0G48818
CC2S	Sensitive	m64023e_220409_165810_92078721_ccs	7250	gene						6671	7150	+	CC2S_00001041				ALOMY0G48823
CC2S	Sensitive	m64023e_220409_165810_9307500_ccs	5040	gene						1789	3824	-	CC2S_00001248	PF00270	DEAD/DEAH box helicase	sp|Q0DB53|RH52A_ORYSJ	ALOMY0G48941
CC2S	Sensitive	m64023e_220409_165810_125241735_ccs	13830	gene						6554	7228	-	CC2S_00000335	PF00190	Cupin	sp|P15290|GER2_WHEAT	ALOMY0G48999		CC2
CC2S	Sensitive	m64023e_220409_165810_142411262_ccs	8100	gene						468	1058	+	CC2S_00000943	PF03478	Protein of unknown function (DUF295)		ALOMY1G00404
CC2S	Sensitive	m64023e_220409_165810_79497311_ccs	7740	gene						4643	5072	-	CC2S_00000975				ALOMY1G00446
CC2S	Sensitive	m64023e_220409_165810_85722533_ccs	6900	gene						2116	3885	+	CC2S_00001081				ALOMY1G00446
CC2S	Sensitive	m64023e_220409_165810_150866227_ccs	3866	gene						2808	3353	-	CC2S_00001344				ALOMY1G00446
CC2S	Sensitive	m64023e_220409_165810_98631991_ccs	22500	gene						3572	5184	+	CC2S_00000009				ALOMY1G00556
CC2S	Sensitive	m64023e_220409_165810_25035241_ccs	13231	gene						8804	9148	-	CC2S_00000390				ALOMY1G00633	TR
CC2S	Sensitive	m64023e_220409_165810_93653760_ccs01	6592	gene						1923	2253	+	CC2S_00001120				ALOMY1G00823
CC2S	Sensitive	m64023e_220409_165810_77269251_ccs	8220	gene						6824	7442	+	CC2S_00000925				ALOMY1G00854
CC2S	Sensitive	m64023e_220409_165810_106103935_ccs00	7920	gene						3813	7493	+	CC2S_00000961	PF03108	MuDR family transposase		ALOMY1G01035
CC2S	Sensitive	m64023e_220409_165810_139331416_ccs	11350	gene						4002	5113	+	CC2S_00000623				ALOMY1G01114
CC2S	Sensitive	m64023e_220409_165810_55051416_ccs	5070	gene						303	518	-	CC2S_00001243				ALOMY1G01224
CC2S	Sensitive	m64023e_220409_165810_55051416_ccs	5070	gene						2824	3692	-	CC2S_00001244				ALOMY1G01237
CC2S	Sensitive	m64023e_220409_165810_116196490_ccs	10710	gene						7513	9546	+	CC2S_00000676				ALOMY1G01287
CC2S	Sensitive	m64023e_220409_165810_165480737_ccs01	4358	gene						865	1575	+	CC2S_00001302				ALOMY1G01322
CC2S	Sensitive	m64023e_220409_165810_165480737_ccs0	4320	gene						184	1296	+	CC2S_00001305				ALOMY1G01322
CC2S	Sensitive	m64023e_220409_165810_118097523_ccs	15263	gene						11660	12605	-	CC2S_00000188			sp|Q9LTA3|U91C1_ARATH	ALOMY1G01526
CC2S	Sensitive	m64023e_220409_165810_138741476_ccs	11765	gene						9660	9881	+	CC2S_00000565				ALOMY1G01535
CC2S	Sensitive	m64023e_220409_165810_169609796_ccs	4980	gene						2342	2860	-	CC2S_00001260			sp|Q9SZL8|FRS5_ARATH	ALOMY1G01958
CC2S	Sensitive	m64023e_220409_165810_64161136_ccs	11250	gene						4788	5590	+	CC2S_00000633				ALOMY1G02069
CC2S	Sensitive	m64023e_220409_165810_90833040_ccs	10410	gene						2712	4582	-	CC2S_00000707				ALOMY1G02102
CC2S	Sensitive	m64023e_220409_165810_97649576_ccs	4523	gene						2654	4451	+	CC2S_00001291				ALOMY1G02102
CC2S	Sensitive	m64023e_220409_165810_131072747_ccs	10410	gene						2559	3116	-	CC2S_00000705	PF00036	EF hand	sp|Q8L3R2|CML41_ARATH	ALOMY1G02228
CC2S	Sensitive	m64023e_220409_165810_131072747_ccs	10410	gene						91	1093	+	CC2S_00000704			sp|Q9SVM0|Y3078_ARATH	ALOMY1G02229
CC2S	Sensitive	m64023e_220409_165810_118293933_ccs	13370	gene						9237	9558	-	CC2S_00000377				ALOMY1G02260
CC2S	Sensitive	m64023e_220409_165810_118293933_ccs	13370	gene						9741	12548	-	CC2S_00000378			sp|Q8LGM7|MOCOS_SOLLC	ALOMY1G02262
CC2S	Sensitive	m64023e_220409_165810_13697561_ccs01	7304	gene						1591	3022	+	CC2S_00001025			sp|P15268|MOSA_MAIZE	ALOMY1G02449
CC2S	Sensitive	m64023e_220409_165810_144706149_ccs	5283	gene						3243	3683	+	CC2S_00001227	PF07911	Protein of unknown function (DUF1677)		ALOMY1G02497
CC2S	Sensitive	m64023e_220409_165810_112264842_ccs	10528	gene						6275	6790	+	CC2S_00000696				ALOMY1G02621
CC2S	Sensitive	m64023e_220409_165810_157221506_ccs	7200	gene						38	896	+	CC2S_00001048				ALOMY1G02730
CC2S	Sensitive	m64023e_220409_165810_78513445_ccs	13548	gene						5080	9267	-	CC2S_00000360	PF00562	RNA polymerase Rpb2, domain 6	sp|A1E9I1|RPOB_HORVU	ALOMY1G02759
CC2S	Sensitive	m64023e_220409_165810_20318558_ccs	23550	gene						1558	13797	+	CC2S_00000003	PF00562	RNA polymerase Rpb2, domain 6	sp|A1E9Z8|RPOB_AGRST	ALOMY1G02759
CC2S	Sensitive	m64023e_220409_165810_134416244_ccs	2513	gene						2089	2472	-	CC2S_00001421			sp|A1E9Z9|RPOC1_AGRST	ALOMY1G02759
CC2S	Sensitive	m64023e_220409_165810_134416244_ccs	2513	gene						19	1792	-	CC2S_00001420	PF00623	RNA polymerase Rpb1, domain 2	sp|A8Y9G1|RPOC1_LOLPR	ALOMY1G02759
CC2S	Sensitive	m64023e_220409_165810_18614176_ccs	1620	gene						197	1569	+	CC2S_00001448	PF04998	RNA polymerase Rpb1, domain 5	sp|A8Y9G2|RPOC2_LOLPR	ALOMY1G02759
CC2S	Sensitive	m64023e_220409_165810_165284370_ccs	11280	gene						9975	10454	-	CC2S_00000627				ALOMY1G02917
CC2S	Sensitive	m64023e_220409_165810_99878910_ccs01	15630	gene						1843	3010	-	CC2S_00000177			sp|Q5Z5Q3|C3H43_ORYSJ	ALOMY1G02951
CC2S	Sensitive	m64023e_220409_165810_126419686_ccs	15504	gene						10029	10895	-	CC2S_00000181	PF03464	eRF1 domain 2	sp|D2K759|ERF1Y_BRAOB	ALOMY1G03020
CC2S	Sensitive	m64023e_220409_165810_126419686_ccs	15504	gene						11066	11341	-	CC2S_00000182	PF03463	eRF1 domain 1	sp|D5LHJ0|ERF1X_BRAOB	ALOMY1G03088
CC2S	Sensitive	m64023e_220409_165810_68224736_ccs	8326	gene						4999	6598	+	CC2S_00000914				ALOMY1G03437
CC2S	Sensitive	m64023e_220409_165810_54461007_ccs	8730	gene						5110	7836	+	CC2S_00000875	PF13445	RING-type zinc-finger	sp|Q7XZZ3|BAHL1_ORYSJ	ALOMY1G03457
CC2S	Sensitive	m64023e_220409_165810_120588529_ccs	14070	gene						363	13488	+	CC2S_00000307	PF00016	Ribulose bisphosphate carboxylase large chain, catalytic domain	sp|A8Y9H8|RBL_LOLPR	ALOMY1G03549
CC2S	Sensitive	m64023e_220409_165810_118556395_ccs	5934	gene						4540	4878	-	CC2S_00001169				ALOMY1G03828
CC2S	Sensitive	m64023e_220409_165810_20186005_ccs0	7410	gene						5982	6788	-	CC2S_00001015				ALOMY1G04013
CC2S	Sensitive	m64023e_220409_165810_127403768_ccs	5503	gene						2500	3360	+	CC2S_00001200	PF04578	Protein of unknown function, DUF594		ALOMY1G04263
CC2S	Sensitive	m64023e_220409_165810_127403768_ccs	5503	gene						959	2443	+	CC2S_00001199	PF13968	Domain of unknown function (DUF4220)		ALOMY1G04264
CC2S	Sensitive	m64023e_220409_165810_7276206_ccs	2958	gene						13	249	+	CC2S_00001399				ALOMY1G04441
CC2S	Sensitive	m64023e_220409_165810_58590403_ccs	16980	gene						745	3523	-	CC2S_00000109				ALOMY1G04457
CC2S	Sensitive	m64023e_220409_165810_91949080_ccs	13770	gene						6082	9604	-	CC2S_00000341	PF01504	Phosphatidylinositol-4-phosphate 5-Kinase	sp|Q9SFB8|PI5K6_ARATH	ALOMY1G04535
CC2S	Sensitive	m64023e_220409_165810_104532760_ccs0	2820	gene						730	1902	+	CC2S_00001408				ALOMY1G04676
CC2S	Sensitive	m64023e_220409_165810_172427762_ccs	3180	gene						2497	3039	+	CC2S_00001390	PF01680	SOR/SNZ family	sp|Q69LA6|PDX11_ORYSJ	ALOMY3G14073		Both
CC2S	Sensitive	m64023e_220409_165810_11011023_ccs	9690	gene						4974	7697	-	CC2S_00000789	PF00514	Armadillo/beta-catenin-like repeat	sp|Q2KI54|ARMC8_BOVIN	ALOMY1G04806
CC2S	Sensitive	m64023e_220409_165810_101187928_ccs	7260	gene						495	1048	+	CC2S_00001030				ALOMY1G04811
CC2S	Sensitive	m64023e_220409_165810_63635459_ccs	17083	gene						11518	11874	-	CC2S_00000103				ALOMY1G04817
CC2S	Sensitive	m64023e_220409_165810_159515392_ccs	14880	gene						10095	14035	+	CC2S_00000214	PF01238	Phosphomannose isomerase type I	sp|Q9FZH5|MPI2_ARATH	ALOMY1G04886
CC2S	Sensitive	m64023e_220409_165810_55773584_ccs	22080	gene						1380	6537	+	CC2S_00000013				ALOMY1G04916
CC2S	Sensitive	m64023e_220409_165810_91555978_ccs	5220	gene						2925	3197	-	CC2S_00001232				ALOMY1G05037
CC2S	Sensitive	m64023e_220409_165810_71828469_ccs	8220	gene						6950	7843	-	CC2S_00000928				ALOMY1G05068
CC2S	Sensitive	m64023e_220409_165810_124519005_ccs	4710	gene						1372	4027	+	CC2S_00001276				ALOMY1G05100
CC2S	Sensitive	m64023e_220409_165810_93719360_ccs01	21663	gene						10710	14135	+	CC2S_00000020	PF04195	Putative gypsy type transposon		ALOMY1G05155
CC2S	Sensitive	m64023e_220409_165810_105122342_ccs	20460	gene						17155	19495	-	CC2S_00000026	PF04195	Putative gypsy type transposon		ALOMY1G05155
CC2S	Sensitive	m64023e_220409_165810_115279961_ccs	19950	gene						12095	15274	+	CC2S_00000032	PF04195	Putative gypsy type transposon		ALOMY1G05155
CC2S	Sensitive	m64023e_220409_165810_159975237_ccs	18214	gene						9781	13022	+	CC2S_00000081	PF04195	Putative gypsy type transposon		ALOMY1G05155
CC2S	Sensitive	m64023e_220409_165810_113444239_ccs	17600	gene						2075	3389	-	CC2S_00000099	PF04195	Putative gypsy type transposon		ALOMY1G05155
CC2S	Sensitive	m64023e_220409_165810_129632951_ccs	16680	gene						3350	6551	-	CC2S_00000123	PF04195	Putative gypsy type transposon		ALOMY1G05155
CC2S	Sensitive	m64023e_220409_165810_171114567_ccs	15840	gene						1898	5075	-	CC2S_00000162	PF04195	Putative gypsy type transposon		ALOMY1G05155
CC2S	Sensitive	m64023e_220409_165810_21169276_ccs	15450	gene						7014	10238	+	CC2S_00000184	PF04195	Putative gypsy type transposon		ALOMY1G05155
CC2S	Sensitive	m64023e_220409_165810_175637982_ccs	15431	gene						8756	12632	+	CC2S_00000185	PF04195	Putative gypsy type transposon		ALOMY1G05155
CC2S	Sensitive	m64023e_220409_165810_86574091_ccs	14931	gene						549	3882	-	CC2S_00000206	PF04195	Putative gypsy type transposon		ALOMY1G05155
CC2S	Sensitive	m64023e_220409_165810_86574091_ccs	14931	gene						9732	10435	+	CC2S_00000207	PF04195	Putative gypsy type transposon		ALOMY1G05155
CC2S	Sensitive	m64023e_220409_165810_10486884_ccs	14580	gene						1906	5108	-	CC2S_00000231	PF04195	Putative gypsy type transposon		ALOMY1G05155
CC2S	Sensitive	m64023e_220409_165810_123864518_ccs	14250	gene						3405	5312	-	CC2S_00000294	PF04195	Putative gypsy type transposon		ALOMY1G05155
CC2S	Sensitive	m64023e_220409_165810_173147418_ccs01	14011	gene						4430	4916	-	CC2S_00000322	PF04195	Putative gypsy type transposon		ALOMY1G05155
CC2S	Sensitive	m64023e_220409_165810_24774980_ccs	13675	gene						1868	5082	-	CC2S_00000354	PF04195	Putative gypsy type transposon		ALOMY1G05155
CC2S	Sensitive	m64023e_220409_165810_23791935_ccs	13426	gene						9346	12185	-	CC2S_00000369	PF04195	Putative gypsy type transposon		ALOMY1G05155
CC2S	Sensitive	m64023e_220409_165810_121374932_ccs	13411	gene						5294	8496	-	CC2S_00000370	PF04195	Putative gypsy type transposon		ALOMY1G05155
CC2S	Sensitive	m64023e_220409_165810_85198822_ccs	13230	gene						2886	7904	+	CC2S_00000391	PF04195	Putative gypsy type transposon		ALOMY1G05155
CC2S	Sensitive	m64023e_220409_165810_59573626_ccs	12990	gene						8559	11794	+	CC2S_00000404	PF04195	Putative gypsy type transposon		ALOMY1G05155
CC2S	Sensitive	m64023e_220409_165810_147391397_ccs	12967	gene						4761	7968	-	CC2S_00000406	PF04195	Putative gypsy type transposon		ALOMY1G05155
CC2S	Sensitive	m64023e_220409_165810_6816398_ccs	12916	gene						2861	6037	-	CC2S_00000421	PF04195	Putative gypsy type transposon		ALOMY1G05155
CC2S	Sensitive	m64023e_220409_165810_119275826_ccs	12810	gene						8417	11629	-	CC2S_00000435	PF04195	Putative gypsy type transposon		ALOMY1G05155
CC2S	Sensitive	m64023e_220409_165810_118031854_ccs	12155	gene						5033	8210	-	CC2S_00000512	PF04195	Putative gypsy type transposon		ALOMY1G05155
CC2S	Sensitive	m64023e_220409_165810_100010811_ccs	11897	gene						6095	9437	+	CC2S_00000549	PF04195	Putative gypsy type transposon		ALOMY1G05155
CC2S	Sensitive	m64023e_220409_165810_5047436_ccs	11359	gene						7933	11117	+	CC2S_00000619	PF04195	Putative gypsy type transposon		ALOMY1G05155
CC2S	Sensitive	m64023e_220409_165810_161023553_ccs	11190	gene						1071	4307	-	CC2S_00000640	PF04195	Putative gypsy type transposon		ALOMY1G05155
CC2S	Sensitive	m64023e_220409_165810_56296215_ccs	10435	gene						1125	4339	+	CC2S_00000703	PF04195	Putative gypsy type transposon		ALOMY1G05155
CC2S	Sensitive	m64023e_220409_165810_176032031_ccs	10096	gene						6808	10014	+	CC2S_00000733	PF04195	Putative gypsy type transposon		ALOMY1G05155
CC2S	Sensitive	m64023e_220409_165810_104792292_ccs	9959	gene						3715	6888	-	CC2S_00000751	PF04195	Putative gypsy type transposon		ALOMY1G05155
CC2S	Sensitive	m64023e_220409_165810_137364566_ccs	9741	gene						2143	4732	+	CC2S_00000778	PF04195	Putative gypsy type transposon		ALOMY1G05155
CC2S	Sensitive	m64023e_220409_165810_85329665_ccs	9739	gene						6240	9475	+	CC2S_00000780	PF04195	Putative gypsy type transposon		ALOMY1G05155
CC2S	Sensitive	m64023e_220409_165810_21038843_ccs	9408	gene						5828	9251	+	CC2S_00000816	PF04195	Putative gypsy type transposon		ALOMY1G05155
CC2S	Sensitive	m64023e_220409_165810_35064153_ccs	9238	gene						5750	8946	+	CC2S_00000833	PF04195	Putative gypsy type transposon		ALOMY1G05155
CC2S	Sensitive	m64023e_220409_165810_87492044_ccs	9060	gene						3	3130	-	CC2S_00000848	PF04195	Putative gypsy type transposon		ALOMY1G05155
CC2S	Sensitive	m64023e_220409_165810_95553703_ccs	8820	gene						4418	7610	-	CC2S_00000869	PF04195	Putative gypsy type transposon		ALOMY1G05155
CC2S	Sensitive	m64023e_220409_165810_110493933_ccs	8820	gene						5420	8643	+	CC2S_00000870	PF04195	Putative gypsy type transposon		ALOMY1G05155
CC2S	Sensitive	m64023e_220409_165810_15796394_ccs	8730	gene						2743	5990	+	CC2S_00000876	PF04195	Putative gypsy type transposon		ALOMY1G05155
CC2S	Sensitive	m64023e_220409_165810_17695763_ccs	8430	gene						564	1217	+	CC2S_00000900	PF04195	Putative gypsy type transposon		ALOMY1G05155
CC2S	Sensitive	m64023e_220409_165810_96928192_ccs	7950	gene						840	4048	-	CC2S_00000955	PF04195	Putative gypsy type transposon		ALOMY1G05155
CC2S	Sensitive	m64023e_220409_165810_77595763_ccs	7740	gene						2553	5465	-	CC2S_00000977	PF04195	Putative gypsy type transposon		ALOMY1G05155
CC2S	Sensitive	m64023e_220409_165810_95158546_ccs	7170	gene						2550	3284	-	CC2S_00001050	PF04195	Putative gypsy type transposon		ALOMY1G05155
CC2S	Sensitive	m64023e_220409_165810_41485457_ccs	6810	gene						1407	4831	-	CC2S_00001099	PF04195	Putative gypsy type transposon		ALOMY1G05155
CC2S	Sensitive	m64023e_220409_165810_88344447_ccs	6750	gene						478	3675	-	CC2S_00001111	PF04195	Putative gypsy type transposon		ALOMY1G05155
CC2S	Sensitive	m64023e_220409_165810_111280276_ccs	6497	gene						59	1673	-	CC2S_00001134	PF04195	Putative gypsy type transposon		ALOMY1G05155
CC2S	Sensitive	m64023e_220409_165810_163645155_ccs	3690	gene						27	783	-	CC2S_00001361	PF04195	Putative gypsy type transposon		ALOMY1G05155
CC2S	Sensitive	m64023e_220409_165810_57214775_ccs	22002	gene						12718	15742	-	CC2S_00000014				ALOMY1G05155
CC2S	Sensitive	m64023e_220409_165810_57214775_ccs	22002	gene						15748	16108	-	CC2S_00000015				ALOMY1G05155
CC2S	Sensitive	m64023e_220409_165810_39847059_ccs	21750	gene						12711	16421	+	CC2S_00000019				ALOMY1G05155
CC2S	Sensitive	m64023e_220409_165810_78316598_ccs	19363	gene						4728	8171	-	CC2S_00000036				ALOMY1G05155
CC2S	Sensitive	m64023e_220409_165810_89654523_ccs	16101	gene						12333	13979	-	CC2S_00000152				ALOMY1G05155
CC2S	Sensitive	m64023e_220409_165810_117834205_ccs	16048	gene						8863	10249	-	CC2S_00000157				ALOMY1G05155
CC2S	Sensitive	m64023e_220409_165810_123667788_ccs	15092	gene						5372	8230	-	CC2S_00000195				ALOMY1G05155
CC2S	Sensitive	m64023e_220409_165810_123667788_ccs	15092	gene						8235	9015	-	CC2S_00000196				ALOMY1G05155
CC2S	Sensitive	m64023e_220409_165810_86574091_ccs	14931	gene						10505	10714	+	CC2S_00000208				ALOMY1G05155
CC2S	Sensitive	m64023e_220409_165810_86574091_ccs	14931	gene						10790	13331	+	CC2S_00000209				ALOMY1G05155
CC2S	Sensitive	m64023e_220409_165810_117507318_ccs	14567	gene						7564	11005	+	CC2S_00000233				ALOMY1G05155
CC2S	Sensitive	m64023e_220409_165810_123864518_ccs	14250	gene						2122	3404	-	CC2S_00000293				ALOMY1G05155
CC2S	Sensitive	m64023e_220409_165810_102302107_ccs	14160	gene						9786	12960	-	CC2S_00000302				ALOMY1G05155
CC2S	Sensitive	m64023e_220409_165810_14483514_ccs	13877	gene						1197	4404	+	CC2S_00000325				ALOMY1G05155
CC2S	Sensitive	m64023e_220409_165810_44172831_ccs	13680	gene						8531	11429	-	CC2S_00000351				ALOMY1G05155
CC2S	Sensitive	m64023e_220409_165810_84150358_ccs	12060	gene						2488	5301	-	CC2S_00000530				ALOMY1G05155
CC2S	Sensitive	m64023e_220409_165810_102695985_ccs	12030	gene						7179	10356	+	CC2S_00000536				ALOMY1G05155
CC2S	Sensitive	m64023e_220409_165810_23462795_ccs0	10950	gene						1824	2081	-	CC2S_00000661				ALOMY1G05155
CC2S	Sensitive	m64023e_220409_165810_23462795_ccs0	10950	gene						2207	4994	-	CC2S_00000662				ALOMY1G05155
CC2S	Sensitive	m64023e_220409_165810_74123429_ccs01	10120	gene						5342	8569	+	CC2S_00000732				ALOMY1G05155
CC2S	Sensitive	m64023e_220409_165810_137364566_ccs	9741	gene						4737	5398	+	CC2S_00000779				ALOMY1G05155
CC2S	Sensitive	m64023e_220409_165810_9766215_ccs	9150	gene						2836	6071	-	CC2S_00000842				ALOMY1G05155
CC2S	Sensitive	m64023e_220409_165810_51578774_ccs	8614	gene						1951	5148	+	CC2S_00000886				ALOMY1G05155
CC2S	Sensitive	m64023e_220409_165810_8522127_ccs	8034	gene						3874	6241	+	CC2S_00000949				ALOMY1G05155
CC2S	Sensitive	m64023e_220409_165810_95158546_ccs	7170	gene						43	2527	-	CC2S_00001049				ALOMY1G05155
CC2S	Sensitive	m64023e_220409_165810_111280276_ccs	6497	gene						6101	6470	-	CC2S_00001135				ALOMY1G05155
CC2S	Sensitive	m64023e_220409_165810_163645155_ccs	3690	gene						2286	3623	-	CC2S_00001362				ALOMY1G05155
CC2S	Sensitive	m64023e_220409_165810_71043316_ccs	11238	gene						5460	6191	-	CC2S_00000636			sp|Q9SIT1|TMK3_ARATH	ALOMY1G05224
CC2S	Sensitive	m64023e_220409_165810_105316417_ccs01	4230	gene						1541	2732	+	CC2S_00001313				ALOMY1G05254
CC2S	Sensitive	m64023e_220409_165810_105316417_ccs0	4215	gene						1935	3824	+	CC2S_00001315				ALOMY1G05254
CC2S	Sensitive	m64023e_220409_165810_85265002_ccs	11265	gene						3385	4014	-	CC2S_00000628	PF05057	Putative serine esterase (DUF676)		ALOMY1G05327
CC2S	Sensitive	m64023e_220409_165810_157157666_ccs01	8950	gene						629	8121	+	CC2S_00000858	PF00852	Glycosyltransferase family 10 (fucosyltransferase) C-term	sp|Q9LJK1|FUT11_ARATH	ALOMY1G05341
CC2S	Sensitive	m64023e_220409_165810_158336130_ccs	8910	gene						993	5196	+	CC2S_00000865	PF00929	Exonuclease	sp|Q9ZVE0|ORN_ARATH	ALOMY1G05484
CC2S	Sensitive	m64023e_220409_165810_157223277_ccs0	4110	gene						78	1908	+	CC2S_00001331	PF00293	NUDIX domain	sp|O48964|IDI1_CAMAC	ALOMY3G15204		CC2
CC2S	Sensitive	m64023e_220409_165810_31653888_ccs	9930	gene						8051	9574	+	CC2S_00000757	PF00069	Protein kinase domain	sp|Q0J4I1|CKB21_ORYSJ	ALOMY1G05821
CC2S	Sensitive	m64023e_220409_165810_147194756_ccs	6005	gene						1322	1845	-	CC2S_00001163				ALOMY1G05945
CC2S	Sensitive	m64023e_220409_165810_68158181_ccs	11073	gene						3755	5004	+	CC2S_00000652	PF00141	Peroxidase	sp|A7QEU4|PER5_VITVI	ALOMY1G05988
CC2S	Sensitive	m64023e_220409_165810_28770624_ccs	10980	gene						325	603	-	CC2S_00000657				ALOMY1G06003
CC2S	Sensitive	m64023e_220409_165810_18481943_ccs	16347	gene						2309	4229	+	CC2S_00000142	PF13041	PPR repeat family	sp|Q9ZUT5|PP191_ARATH	ALOMY1G06222
CC2S	Sensitive	m64023e_220409_165810_71828469_ccs	8220	gene						3331	3585	+	CC2S_00000927				ALOMY1G06268
CC2S	Sensitive	m64023e_220409_165810_162465684_ccs	13251	gene						11035	13114	-	CC2S_00000388	PF00069	Protein kinase domain	sp|Q6Z8C8|CDKF4_ORYSJ	ALOMY1G06312
CC2S	Sensitive	m64023e_220409_165810_75760716_ccs	3720	gene						1	2989	+	CC2S_00001357	PF00069	Protein kinase domain	sp|Q6Z8C8|CDKF4_ORYSJ	ALOMY1G06312
CC2S	Sensitive	m64023e_220409_165810_9112120_ccs	20070	gene						6207	7444	+	CC2S_00000029	PF13738	Pyridine nucleotide-disulphide oxidoreductase	sp|Q9LPL3|YUC11_ARATH	ALOMY1G06391
CC2S	Sensitive	m64023e_220409_165810_127337050_ccs	18600	gene						14180	17405	-	CC2S_00000061				ALOMY1G06605
CC2S	Sensitive	m64023e_220409_165810_159646385_ccs	17031	gene						11935	14419	+	CC2S_00000106				ALOMY1G06605
CC2S	Sensitive	m64023e_220409_165810_89654523_ccs	16101	gene						10695	12326	-	CC2S_00000151				ALOMY1G06605
CC2S	Sensitive	m64023e_220409_165810_117834205_ccs	16048	gene						7072	8524	-	CC2S_00000156				ALOMY1G06605
CC2S	Sensitive	m64023e_220409_165810_173147418_ccs01	14011	gene						1696	3823	-	CC2S_00000320				ALOMY1G06605
CC2S	Sensitive	m64023e_220409_165810_75498489_ccs	9660	gene						169	2264	-	CC2S_00000792				ALOMY1G06605
CC2S	Sensitive	m64023e_220409_165810_33098496_ccs	9360	gene						116	1095	+	CC2S_00000820				ALOMY1G06605
CC2S	Sensitive	m64023e_220409_165810_54068909_ccs	7953	gene						6075	7556	-	CC2S_00000953				ALOMY1G06605
CC2S	Sensitive	m64023e_220409_165810_36373213_ccs	7564	gene						4768	6445	+	CC2S_00000997				ALOMY1G06605
CC2S	Sensitive	m64023e_220409_165810_108855927_ccs	7290	gene						56	2076	+	CC2S_00001027				ALOMY1G06605
CC2S	Sensitive	m64023e_220409_165810_133038782_ccs01	7210	gene						1347	3289	+	CC2S_00001044				ALOMY1G06605
CC2S	Sensitive	m64023e_220409_165810_28770624_ccs	10980	gene						646	996	-	CC2S_00000658				ALOMY1G06857
CC2S	Sensitive	m64023e_220409_165810_60621489_ccs	8670	gene						4641	4925	+	CC2S_00000880				ALOMY1G06864
CC2S	Sensitive	m64023e_220409_165810_83429075_ccs	9142	gene						684	866	-	CC2S_00000844				ALOMY1G06922
CC2S	Sensitive	m64023e_220409_165810_118358791_ccs	2697	gene						283	1557	-	CC2S_00001411			sp|Q8W4E6|HPAT1_ARATH	ALOMY1G06944
CC2S	Sensitive	m64023e_220409_165810_85657364_ccs	4668	gene						3028	4481	-	CC2S_00001279				ALOMY1G07208
CC2S	Sensitive	m64023e_220409_165810_50923522_ccs	9687	gene						4824	5207	-	CC2S_00000790				ALOMY1G07246
CC2S	Sensitive	m64023e_220409_165810_28575237_ccs	8921	gene						4351	8049	+	CC2S_00000863	PF00060	Ligand-gated ion channel	sp|Q9LFN5|GLR25_ARATH	ALOMY1G07267
CC2S	Sensitive	m64023e_220409_165810_74253586_ccs	6180	gene						1493	1799	-	CC2S_00001153				ALOMY1G07302
CC2S	Sensitive	m64023e_220409_165810_123340590_ccs	10947	gene						8606	9847	+	CC2S_00000665	PF08268	F-box associated domain	sp|Q9FHP3|FB300_ARATH	ALOMY1G07312
CC2S	Sensitive	m64023e_220409_165810_152570487_ccs	16287	gene						11362	11640	-	CC2S_00000147				ALOMY1G07315
CC2S	Sensitive	m64023e_220409_165810_73271236_ccs	7645	gene						6066	7360	-	CC2S_00000987				ALOMY1G07447
CC2S	Sensitive	m64023e_220409_165810_143261865_ccs	10050	gene						439	1892	+	CC2S_00000741				ALOMY1G07520
CC2S	Sensitive	m64023e_220409_165810_140577456_ccs	7924	gene						3305	4024	-	CC2S_00000958				ALOMY1G07721
CC2S	Sensitive	m64023e_220409_165810_172820912_ccs	10170	gene						4311	4852	+	CC2S_00000731	PF00098	Zinc knuckle		ALOMY1G07765
CC2S	Sensitive	m64023e_220409_165810_100796592_ccs	8850	gene						2005	2298	+	CC2S_00000868	PF00098	Zinc knuckle		ALOMY1G07765
CC2S	Sensitive	m64023e_220409_165810_3081251_ccs	9765	gene						7214	7435	-	CC2S_00000770			sp|Q0JP99|Y1341_ORYSJ	ALOMY1G07802	TF
CC2S	Sensitive	m64023e_220409_165810_3081251_ccs	9765	gene						7524	9422	-	CC2S_00000771				ALOMY1G07802	TF
CC2S	Sensitive	m64023e_220409_165810_99093274_ccs	12030	gene						4368	6649	+	CC2S_00000532				ALOMY1G07909
CC2S	Sensitive	m64023e_220409_165810_44761721_ccs	12011	gene						24	512	+	CC2S_00000537				ALOMY1G07917
CC2S	Sensitive	m64023e_220409_165810_13044107_ccs	2673	gene						57	2650	+	CC2S_00001413	PF02922	Carbohydrate-binding module 48 (Isoamylase N-terminal domain)	sp|Q01401|GLGB_ORYSJ	ALOMY1G07961
CC2S	Sensitive	m64023e_220409_165810_105775966_ccs	5640	gene						2202	2765	-	CC2S_00001186	PF13912	C2H2-type zinc finger		ALOMY1G07975	TF
CC2S	Sensitive	m64023e_220409_165810_175966943_ccs	8162	gene						3648	3935	+	CC2S_00000935			sp|Q9M2V7|AB16G_ARATH	ALOMY1G08060
CC2S	Sensitive	m64023e_220409_165810_175966943_ccs	8162	gene						3230	3576	+	CC2S_00000934				ALOMY1G08060
CC2S	Sensitive	m64023e_220409_165810_77006021_ccs	6300	gene						31	1099	-	CC2S_00001145				ALOMY1G08096
CC2S	Sensitive	m64023e_220409_165810_107350646_ccs0	5490	gene						3243	3643	-	CC2S_00001202				ALOMY1G08133
CC2S	Sensitive	m64023e_220409_165810_68159829_ccs	7620	gene						2582	2908	+	CC2S_00000992				ALOMY1G08328
CC2S	Sensitive	m64023e_220409_165810_41615844_ccs	16438	gene						12690	14962	-	CC2S_00000140	PF04864	Allinase	sp|Q93Z38|TAR4_ARATH	ALOMY1G08375
CC2S	Sensitive	m64023e_220409_165810_20710544_ccs	7452	gene						5016	6856	-	CC2S_00001011				ALOMY1G08397
CC2S	Sensitive	m64023e_220409_165810_118294781_ccs	5880	gene						26	952	+	CC2S_00001174				ALOMY1G08397
CC2S	Sensitive	m64023e_220409_165810_62587574_ccs	5500	gene						1212	4183	+	CC2S_00001201	PF00646	F-box domain	sp|Q9C6J3|FB52_ARATH	ALOMY1G08442
CC2S	Sensitive	m64023e_220409_165810_83429075_ccs	9142	gene						234	422	-	CC2S_00000843	PF05637	galactosyl transferase GMA12/MNN10 family	sp|Q2R2W8|GT6_ORYSJ	ALOMY1G08479
CC2S	Sensitive	m64023e_220409_165810_32901756_ccs	13663	gene						10660	13094	+	CC2S_00000355				ALOMY1G08499
CC2S	Sensitive	m64023e_220409_165810_70912249_ccs01	16835	gene						8747	10563	+	CC2S_00000118				ALOMY1G08598
CC2S	Sensitive	m64023e_220409_165810_60229071_ccs	4610	gene						1314	1643	+	CC2S_00001286				ALOMY1G08621
CC2S	Sensitive	m64023e_220409_165810_50202903_ccs	12822	gene						7096	7548	+	CC2S_00000434				ALOMY1G08625
CC2S	Sensitive	m64023e_220409_165810_9372011_ccs0	3390	gene						1	352	+	CC2S_00001381				ALOMY1G08632	TF
CC2S	Sensitive	m64023e_220409_165810_96470782_ccs	6537	gene						3882	4124	+	CC2S_00001127				ALOMY1G08650
CC2S	Sensitive	m64023e_220409_165810_139069372_ccs	13290	gene						9106	9249	+	CC2S_00000380				ALOMY1G08741
CC2S	Sensitive	m64023e_220409_165810_170328696_ccs01	7800	gene						5113	7277	+	CC2S_00000970	PF00252	Ribosomal protein L16p/L10e	sp|A1EA46|RK16_AGRST	ALOMY1G08801
CC2S	Sensitive	m64023e_220409_165810_26346338_ccs	7626	gene						4027	4893	-	CC2S_00000990	PF00238	Ribosomal protein L14p/L23e	sp|A8Y9C2|RR8_LOLPR	ALOMY1G08801
CC2S	Sensitive	m64023e_220409_165810_46990919_ccs	6788	gene						2457	3279	-	CC2S_00001101	PF00238	Ribosomal protein L14p/L23e	sp|A8Y9C2|RR8_LOLPR	ALOMY1G08801
CC2S	Sensitive	m64023e_220409_165810_37553086_ccs	11570	gene						10511	11048	-	CC2S_00000594				ALOMY1G08940
CC2S	Sensitive	m64023e_220409_165810_154797664_ccs	11370	gene						10668	11179	+	CC2S_00000618				ALOMY1G08940
CC2S	Sensitive	m64023e_220409_165810_40042718_ccs	9324	gene						3790	4282	+	CC2S_00000827	PF00646	F-box domain	sp|Q949S5|P2B11_ARATH	ALOMY1G09099
CC2S	Sensitive	m64023e_220409_165810_18481943_ccs	16347	gene						645	1107	-	CC2S_00000141				ALOMY1G09125
CC2S	Sensitive	m64023e_220409_165810_80217137_ccs	5310	gene						1865	5115	+	CC2S_00001225			sp|Q75HV1|KN14J_ORYSJ	ALOMY1G09262
CC2S	Sensitive	m64023e_220409_165810_35064491_ccs01	5602	gene						5068	5436	-	CC2S_00001191				ALOMY1G09312
CC2S	Sensitive	m64023e_220409_165810_129106490_ccs	10080	gene						8	3119	-	CC2S_00000734	PF01411	tRNA synthetases class II (A)	sp|B8B4H5|SYAP_ORYSI	ALOMY1G09335
CC2S	Sensitive	m64023e_220409_165810_129106490_ccs	10080	gene						5703	9457	-	CC2S_00000735	PF00504	Chlorophyll A-B binding protein	sp|C5Z7K4|SYAP_SORBI	ALOMY1G09335
CC2S	Sensitive	m64023e_220409_165810_27459848_ccs	7814	gene						4598	5419	-	CC2S_00000967				ALOMY1G09478
CC2S	Sensitive	m64023e_220409_165810_109709506_ccs	13770	gene						2287	5229	-	CC2S_00000340				ALOMY1G09549
CC2S	Sensitive	m64023e_220409_165810_69206073_ccs	9229	gene						9038	9214	-	CC2S_00000834				ALOMY1G09642
CC2S	Sensitive	m64023e_220409_165810_96207943_ccs01	7597	gene						4735	6271	-	CC2S_00000994	PF00201	UDP-glucoronosyl and UDP-glucosyl transferase	sp|F8WKW1|UGT2_GARJA	ALOMY1G09715
CC2S	Sensitive	m64023e_220409_165810_98437004_ccs01	7144	gene						1203	4228	-	CC2S_00001053	PF03101	FAR1 DNA-binding domain	sp|Q9S793|FRS8_ARATH	ALOMY1G09842
CC2S	Sensitive	m64023e_220409_165810_176947373_ccs01	2841	gene						1602	1757	+	CC2S_00001405				ALOMY1G09906
CC2S	Sensitive	m64023e_220409_165810_59442597_ccs	11940	gene						6100	7853	+	CC2S_00000545				ALOMY1G09955
CC2S	Sensitive	m64023e_220409_165810_134808065_ccs	12360	gene						752	1342	-	CC2S_00000499				ALOMY1G09967
CC2S	Sensitive	m64023e_220409_165810_132317499_ccs	4879	gene						728	2022	-	CC2S_00001266				ALOMY2G17764
CC2S	Sensitive	m64023e_220409_165810_29493803_ccs	7980	gene						4942	6184	-	CC2S_00000952				ALOMY2G17787
CC2S	Sensitive	m64023e_220409_165810_100270275_ccs01	4315	gene						2515	3131	+	CC2S_00001307	PF02798	Glutathione S-transferase, N-terminal domain	sp|Q03663|GSTX2_TOBAC	ALOMY2G17890			Probable glutathione S-transferase
CC2S	Sensitive	m64023e_220409_165810_37554559_ccs0	7380	gene						2431	5952	+	CC2S_00001017				ALOMY2G17967
CC2S	Sensitive	m64023e_220409_165810_82444290_ccs	5370	gene						1407	1634	-	CC2S_00001213				ALOMY2G18018
CC2S	Sensitive	m64023e_220409_165810_78973015_ccs	6896	gene						1862	5862	-	CC2S_00001084	PF00124	Photosynthetic reaction centre protein	sp|P0C437|PSBD_ORYSJ	ALOMY2G18054
CC2S	Sensitive	m64023e_220409_165810_78776523_ccs	18311	gene						755	3185	-	CC2S_00000069	PF00421	Photosystem II protein	sp|P10803|PSBD_SECCE	ALOMY2G18054
CC2S	Sensitive	m64023e_220409_165810_176095957_ccs	13830	gene						6654	8369	+	CC2S_00000337	PF00124	Photosynthetic reaction centre protein	sp|P11849|PSBD_HORVU	ALOMY2G18054
CC2S	Sensitive	m64023e_220409_165810_141166494_ccs	9690	gene						3524	4709	+	CC2S_00000786	PF00124	Photosynthetic reaction centre protein	sp|P11849|PSBD_HORVU	ALOMY2G18054
CC2S	Sensitive	m64023e_220409_165810_15794565_ccs	16860	gene						12631	15060	+	CC2S_00000117	PF00421	Photosystem II protein	sp|P11849|PSBD_HORVU	ALOMY2G18054
CC2S	Sensitive	m64023e_220409_165810_91161912_ccs	14490	gene						8335	10764	+	CC2S_00000248	PF00421	Photosystem II protein	sp|P11849|PSBD_HORVU	ALOMY2G18054
CC2S	Sensitive	m64023e_220409_165810_51970385_ccs01	6828	gene						4028	5093	-	CC2S_00001097	PF00085	Thioredoxin	sp|Q5JMR9|TRXY_ORYSJ	ALOMY2G18178
CC2S	Sensitive	m64023e_220409_165810_51054840_ccs	7104	gene						5842	6537	+	CC2S_00001060				ALOMY2G18428
CC2S	Sensitive	m64023e_220409_165810_51054840_ccs	7104	gene						6605	7102	+	CC2S_00001061				ALOMY2G18429
CC2S	Sensitive	m64023e_220409_165810_112264842_ccs	10528	gene						8151	10473	+	CC2S_00000697	PF14543	Xylanase inhibitor N-terminal	sp|Q4V3D2|ASP36_ARATH	ALOMY2G18641
CC2S	Sensitive	m64023e_220409_165810_133695024_ccs0	3960	gene						143	388	+	CC2S_00001335				ALOMY2G18655
CC2S	Sensitive	m64023e_220409_165810_19006009_ccs	2836	gene						1315	2292	-	CC2S_00001407	PF00240	Ubiquitin family	sp|P0CH33|UBQ11_ARATH	ALOMY2G18663
CC2S	Sensitive	m64023e_220409_165810_74319205_ccs	12654	gene						6008	8552	-	CC2S_00000468				ALOMY2G18701
CC2S	Sensitive	m64023e_220409_165810_17631930_ccs	4070	gene						2554	2721	+	CC2S_00001332				ALOMY2G18787
CC2S	Sensitive	m64023e_220409_165810_179634830_ccs	8370	gene						6638	6823	+	CC2S_00000907				ALOMY2G18837
CC2S	Sensitive	m64023e_220409_165810_70059676_ccs	12605	gene						9788	11219	+	CC2S_00000480	PF03478	Protein of unknown function (DUF295)		ALOMY2G18885
CC2S	Sensitive	m64023e_220409_165810_5704363_ccs	4020	gene						1604	2419	-	CC2S_00001334	PF08268	F-box associated domain		ALOMY2G18892
CC2S	Sensitive	m64023e_220409_165810_59442597_ccs	11940	gene						1627	2424	-	CC2S_00000544				ALOMY2G18956
CC2S	Sensitive	m64023e_220409_165810_15271723_ccs	7272	gene						5979	7217	+	CC2S_00001029	PF12937	F-box-like		ALOMY2G19058
CC2S	Sensitive	m64023e_220409_165810_86968587_ccs	14451	gene						9714	11257	-	CC2S_00000256	PF12937	F-box-like		ALOMY2G19059
CC2S	Sensitive	m64023e_220409_165810_156960186_ccs	9425	gene						7073	7970	-	CC2S_00000811				ALOMY2G19155
CC2S	Sensitive	m64023e_220409_165810_80284456_ccs	11670	gene						2432	2972	-	CC2S_00000577				ALOMY2G19332
CC2S	Sensitive	m64023e_220409_165810_88802764_ccs	14910	gene						4199	5576	+	CC2S_00000210	PF12937	F-box-like	sp|Q9S9V9|FBL23_ARATH	ALOMY2G19343
CC2S	Sensitive	m64023e_220409_165810_22547197_ccs	9558	gene						1803	2639	-	CC2S_00000800	PF13656	RNA polymerase Rpb3/Rpb11 dimerisation domain	sp|Q38859|NRPBB_ARATH	ALOMY2G19559
CC2S	Sensitive	m64023e_220409_165810_157878653_ccs	2277	gene						1726	2091	+	CC2S_00001427				ALOMY2G19850
CC2S	Sensitive	m64023e_220409_165810_161482114_ccs	12630	gene						1	3312	+	CC2S_00000478	PF09265	Cytokinin dehydrogenase 1, FAD and cytokinin binding	sp|Q5ZAY9|CKX5_ORYSJ	ALOMY2G20142
CC2S	Sensitive	m64023e_220409_165810_19990295_ccs	10350	gene						3152	10346	+	CC2S_00000716	PF00067	Cytochrome P450	sp|Q9ZUX1|C94C1_ARATH	ALOMY2G20339
CC2S	Sensitive	m64023e_220409_165810_70257179_ccs	10860	gene						3678	5578	-	CC2S_00000669	PF13519	von Willebrand factor type A domain	sp|Q9ZQ46|WAVH1_ARATH	ALOMY2G20397
CC2S	Sensitive	m64023e_220409_165810_167248323_ccs	8370	gene						4581	4844	+	CC2S_00000906				ALOMY2G20519
CC2S	Sensitive	m64023e_220409_165810_157943610_ccs01	3419	gene						1674	3412	+	CC2S_00001379	PF10536	Plant mobile domain		ALOMY2G20587
CC2S	Sensitive	m64023e_220409_165810_135791818_ccs	5910	gene						2029	3297	+	CC2S_00001171	PF00201	UDP-glucoronosyl and UDP-glucosyl transferase	sp|Q4R1I9|ANGLT_ROSHC	ALOMY2G20722
CC2S	Sensitive	m64023e_220409_165810_151651223_ccs	6870	gene						173	1528	+	CC2S_00001086			sp|Q852L0|HD16N_ORYSJ	ALOMY2G20784
CC2S	Sensitive	m64023e_220409_165810_153616535_ccs0	14550	gene						2482	5528	-	CC2S_00000236	PF07724	AAA domain (Cdc48 subfamily)	sp|Q6F2Y7|CLPB1_ORYSJ	ALOMY2G20792
CC2S	Sensitive	m64023e_220409_165810_153616535_ccs0	14550	gene						2198	2440	-	CC2S_00000235			sp|Q6F2Y7|CLPB1_ORYSJ	ALOMY2G20792
CC2S	Sensitive	m64023e_220409_165810_44239499_ccs	19290	gene						12206	15142	+	CC2S_00000038	PF04195	Putative gypsy type transposon		ALOMY2G20844
CC2S	Sensitive	m64023e_220409_165810_123340804_ccs	18832	gene						4531	11706	-	CC2S_00000052	PF04195	Putative gypsy type transposon		ALOMY2G20844
CC2S	Sensitive	m64023e_220409_165810_96798985_ccs	18420	gene						6134	6779	+	CC2S_00000064	PF04195	Putative gypsy type transposon		ALOMY2G20844
CC2S	Sensitive	m64023e_220409_165810_109971917_ccs	18060	gene						216	1592	-	CC2S_00000084	PF04195	Putative gypsy type transposon		ALOMY2G20844
CC2S	Sensitive	m64023e_220409_165810_65143872_ccs	17700	gene						14214	17150	-	CC2S_00000095	PF04195	Putative gypsy type transposon		ALOMY2G20844
CC2S	Sensitive	m64023e_220409_165810_141164677_ccs	17070	gene						6207	9151	+	CC2S_00000105	PF04195	Putative gypsy type transposon		ALOMY2G20844
CC2S	Sensitive	m64023e_220409_165810_159320451_ccs	16890	gene						6350	9116	+	CC2S_00000115	PF04195	Putative gypsy type transposon		ALOMY2G20844
CC2S	Sensitive	m64023e_220409_165810_89654523_ccs	16101	gene						561	3466	+	CC2S_00000150	PF04195	Putative gypsy type transposon		ALOMY2G20844
CC2S	Sensitive	m64023e_220409_165810_90310290_ccs	15030	gene						7553	10482	-	CC2S_00000198	PF04195	Putative gypsy type transposon		ALOMY2G20844
CC2S	Sensitive	m64023e_220409_165810_43582768_ccs	14700	gene						3506	6443	-	CC2S_00000219	PF04195	Putative gypsy type transposon		ALOMY2G20844
CC2S	Sensitive	m64023e_220409_165810_110429295_ccs	14611	gene						9443	11552	+	CC2S_00000222	PF04195	Putative gypsy type transposon		ALOMY2G20844
CC2S	Sensitive	m64023e_220409_165810_171771767_ccs	14554	gene						8031	10723	+	CC2S_00000234	PF04195	Putative gypsy type transposon		ALOMY2G20844
CC2S	Sensitive	m64023e_220409_165810_9962994_ccs	14520	gene						8469	11403	-	CC2S_00000243	PF04195	Putative gypsy type transposon		ALOMY2G20844
CC2S	Sensitive	m64023e_220409_165810_28967456_ccs	13657	gene						5281	8241	+	CC2S_00000356	PF04195	Putative gypsy type transposon		ALOMY2G20844
CC2S	Sensitive	m64023e_220409_165810_59049010_ccs	13290	gene						49	1537	-	CC2S_00000382	PF04195	Putative gypsy type transposon		ALOMY2G20844
CC2S	Sensitive	m64023e_220409_165810_87229294_ccs	12753	gene						554	3493	+	CC2S_00000437	PF04195	Putative gypsy type transposon		ALOMY2G20844
CC2S	Sensitive	m64023e_220409_165810_13959973_ccs	12060	gene						1190	2572	-	CC2S_00000527	PF04195	Putative gypsy type transposon		ALOMY2G20844
CC2S	Sensitive	m64023e_220409_165810_130418719_ccs	11760	gene						1240	2331	+	CC2S_00000566	PF04195	Putative gypsy type transposon		ALOMY2G20844
CC2S	Sensitive	m64023e_220409_165810_48824555_ccs	11070	gene						2744	7030	-	CC2S_00000653	PF04195	Putative gypsy type transposon		ALOMY2G20844
CC2S	Sensitive	m64023e_220409_165810_18022643_ccs	10951	gene						1260	3907	+	CC2S_00000660	PF04195	Putative gypsy type transposon		ALOMY2G20844
CC2S	Sensitive	m64023e_220409_165810_135137679_ccs	10740	gene						2496	5435	+	CC2S_00000673	PF04195	Putative gypsy type transposon		ALOMY2G20844
CC2S	Sensitive	m64023e_220409_165810_112788496_ccs	10676	gene						2114	2976	+	CC2S_00000680	PF04195	Putative gypsy type transposon		ALOMY2G20844
CC2S	Sensitive	m64023e_220409_165810_591867_ccs	10501	gene						5904	7731	-	CC2S_00000699	PF04195	Putative gypsy type transposon		ALOMY2G20844
CC2S	Sensitive	m64023e_220409_165810_178981091_ccs	10470	gene						5732	7343	-	CC2S_00000701	PF04195	Putative gypsy type transposon		ALOMY2G20844
CC2S	Sensitive	m64023e_220409_165810_160827137_ccs	10372	gene						589	3521	+	CC2S_00000710	PF04195	Putative gypsy type transposon		ALOMY2G20844
CC2S	Sensitive	m64023e_220409_165810_166396807_ccs	10356	gene						550	3490	+	CC2S_00000713	PF04195	Putative gypsy type transposon		ALOMY2G20844
CC2S	Sensitive	m64023e_220409_165810_119604429_ccs	10350	gene						4409	5874	+	CC2S_00000714	PF04195	Putative gypsy type transposon		ALOMY2G20844
CC2S	Sensitive	m64023e_220409_165810_7342362_ccs01	10259	gene						5584	8395	-	CC2S_00000722	PF04195	Putative gypsy type transposon		ALOMY2G20844
CC2S	Sensitive	m64023e_220409_165810_125962138_ccs	10020	gene						1701	4641	+	CC2S_00000746	PF04195	Putative gypsy type transposon		ALOMY2G20844
CC2S	Sensitive	m64023e_220409_165810_95094250_ccs	9941	gene						4176	5031	+	CC2S_00000752	PF04195	Putative gypsy type transposon		ALOMY2G20844
CC2S	Sensitive	m64023e_220409_165810_16386480_ccs	9580	gene						2976	5918	+	CC2S_00000799	PF04195	Putative gypsy type transposon		ALOMY2G20844
CC2S	Sensitive	m64023e_220409_165810_90308818_ccs	9541	gene						6776	9541	+	CC2S_00000801	PF04195	Putative gypsy type transposon		ALOMY2G20844
CC2S	Sensitive	m64023e_220409_165810_91424063_ccs	9407	gene						7459	9298	+	CC2S_00000817	PF04195	Putative gypsy type transposon		ALOMY2G20844
CC2S	Sensitive	m64023e_220409_165810_73926278_ccs	9330	gene						444	2781	+	CC2S_00000822	PF04195	Putative gypsy type transposon		ALOMY2G20844
CC2S	Sensitive	m64023e_220409_165810_164037028_ccs	9150	gene						66	1110	-	CC2S_00000840	PF04195	Putative gypsy type transposon		ALOMY2G20844
CC2S	Sensitive	m64023e_220409_165810_48825836_ccs	8679	gene						2951	5889	+	CC2S_00000879	PF04195	Putative gypsy type transposon		ALOMY2G20844
CC2S	Sensitive	m64023e_220409_165810_143786149_ccs	8495	gene						549	2249	+	CC2S_00000897	PF04195	Putative gypsy type transposon		ALOMY2G20844
CC2S	Sensitive	m64023e_220409_165810_139002004_ccs	8370	gene						6136	7830	-	CC2S_00000905	PF04195	Putative gypsy type transposon		ALOMY2G20844
CC2S	Sensitive	m64023e_220409_165810_104270320_ccs	8254	gene						6004	7765	+	CC2S_00000923	PF04195	Putative gypsy type transposon		ALOMY2G20844
CC2S	Sensitive	m64023e_220409_165810_136644022_ccs	8179	gene						124	1953	-	CC2S_00000933	PF04195	Putative gypsy type transposon		ALOMY2G20844
CC2S	Sensitive	m64023e_220409_165810_101320402_ccs	7530	gene						2479	4258	-	CC2S_00001001	PF04195	Putative gypsy type transposon		ALOMY2G20844
CC2S	Sensitive	m64023e_220409_165810_136841906_ccs	7292	gene						4507	7292	+	CC2S_00001026	PF04195	Putative gypsy type transposon		ALOMY2G20844
CC2S	Sensitive	m64023e_220409_165810_11733071_ccs	6300	gene						1916	4869	-	CC2S_00001146	PF04195	Putative gypsy type transposon		ALOMY2G20844
CC2S	Sensitive	m64023e_220409_165810_130351370_ccs	5130	gene						153	2369	-	CC2S_00001238	PF04195	Putative gypsy type transposon		ALOMY2G20844
CC2S	Sensitive	m64023e_220409_165810_7079386_ccs	5010	gene						759	2169	-	CC2S_00001255	PF04195	Putative gypsy type transposon		ALOMY2G20844
CC2S	Sensitive	m64023e_220409_165810_168230970_ccs	4671	gene						15	1423	-	CC2S_00001278	PF04195	Putative gypsy type transposon		ALOMY2G20844
CC2S	Sensitive	m64023e_220409_165810_6228281_ccs0	4200	gene						10	1524	-	CC2S_00001317	PF04195	Putative gypsy type transposon		ALOMY2G20844
CC2S	Sensitive	m64023e_220409_165810_164825342_ccs	3900	gene						2388	3838	+	CC2S_00001340	PF04195	Putative gypsy type transposon		ALOMY2G20844
CC2S	Sensitive	m64023e_220409_165810_98962147_ccs0	3000	gene						96	1480	-	CC2S_00001397	PF04195	Putative gypsy type transposon		ALOMY2G20844
CC2S	Sensitive	m64023e_220409_165810_98108712_ccs	23580	gene						268	8786	+	CC2S_00000001				ALOMY2G20844
CC2S	Sensitive	m64023e_220409_165810_106366872_ccs	22895	gene						6521	8303	+	CC2S_00000007				ALOMY2G20844
CC2S	Sensitive	m64023e_220409_165810_115279961_ccs	19950	gene						2244	5312	-	CC2S_00000031				ALOMY2G20844
CC2S	Sensitive	m64023e_220409_165810_124716123_ccs	19537	gene						14865	17183	+	CC2S_00000034				ALOMY2G20844
CC2S	Sensitive	m64023e_220409_165810_54854148_ccs	19200	gene						5939	8648	+	CC2S_00000039				ALOMY2G20844
CC2S	Sensitive	m64023e_220409_165810_159778791_ccs	18679	gene						550	3499	+	CC2S_00000060				ALOMY2G20844
CC2S	Sensitive	m64023e_220409_165810_96798985_ccs	18420	gene						6819	7393	+	CC2S_00000065				ALOMY2G20844
CC2S	Sensitive	m64023e_220409_165810_96798985_ccs	18420	gene						7462	8191	+	CC2S_00000066				ALOMY2G20844
CC2S	Sensitive	m64023e_220409_165810_96798985_ccs	18420	gene						8222	8757	+	CC2S_00000067				ALOMY2G20844
CC2S	Sensitive	m64023e_220409_165810_62194920_ccs	18256	gene						6192	7354	+	CC2S_00000075				ALOMY2G20844
CC2S	Sensitive	m64023e_220409_165810_62194920_ccs	18256	gene						7373	8638	+	CC2S_00000076				ALOMY2G20844
CC2S	Sensitive	m64023e_220409_165810_30739083_ccs	18000	gene						9930	12472	+	CC2S_00000085				ALOMY2G20844
CC2S	Sensitive	m64023e_220409_165810_30739083_ccs	18000	gene						12587	12874	+	CC2S_00000086				ALOMY2G20844
CC2S	Sensitive	m64023e_220409_165810_50465475_ccs	17663	gene						8859	9978	-	CC2S_00000096				ALOMY2G20844
CC2S	Sensitive	m64023e_220409_165810_50465475_ccs	17663	gene						10018	11802	-	CC2S_00000097				ALOMY2G20844
CC2S	Sensitive	m64023e_220409_165810_159320451_ccs	16890	gene						80	1203	+	CC2S_00000113				ALOMY2G20844
CC2S	Sensitive	m64023e_220409_165810_159320451_ccs	16890	gene						1335	1874	+	CC2S_00000114				ALOMY2G20844
CC2S	Sensitive	m64023e_220409_165810_75302063_ccs	16740	gene						4471	7085	+	CC2S_00000120				ALOMY2G20844
CC2S	Sensitive	m64023e_220409_165810_41683165_ccs	16050	gene						5324	6645	-	CC2S_00000154				ALOMY2G20844
CC2S	Sensitive	m64023e_220409_165810_41683165_ccs	16050	gene						6669	8318	-	CC2S_00000155				ALOMY2G20844
CC2S	Sensitive	m64023e_220409_165810_113442950_ccs	14622	gene						5302	8243	-	CC2S_00000220				ALOMY2G20844
CC2S	Sensitive	m64023e_220409_165810_113442950_ccs	14622	gene						9352	10666	-	CC2S_00000221				ALOMY2G20844
CC2S	Sensitive	m64023e_220409_165810_110429295_ccs	14611	gene						11572	11763	+	CC2S_00000223				ALOMY2G20844
CC2S	Sensitive	m64023e_220409_165810_176357494_ccs	13860	gene						4657	7131	+	CC2S_00000326				ALOMY2G20844
CC2S	Sensitive	m64023e_220409_165810_58983595_ccs	13350	gene						22	1848	+	CC2S_00000379				ALOMY2G20844
CC2S	Sensitive	m64023e_220409_165810_98241030_ccs	12930	gene						9681	12370	-	CC2S_00000420				ALOMY2G20844
CC2S	Sensitive	m64023e_220409_165810_145425462_ccs	12120	gene						10111	12118	-	CC2S_00000523				ALOMY2G20844
CC2S	Sensitive	m64023e_220409_165810_13959973_ccs	12060	gene						7	1077	-	CC2S_00000526				ALOMY2G20844
CC2S	Sensitive	m64023e_220409_165810_67832102_ccs	12060	gene						3364	6375	-	CC2S_00000529				ALOMY2G20844
CC2S	Sensitive	m64023e_220409_165810_130418719_ccs	11760	gene						2376	4189	+	CC2S_00000567				ALOMY2G20844
CC2S	Sensitive	m64023e_220409_165810_107285142_ccs	11551	gene						856	2921	+	CC2S_00000595				ALOMY2G20844
CC2S	Sensitive	m64023e_220409_165810_112788496_ccs	10676	gene						3061	4986	+	CC2S_00000681				ALOMY2G20844
CC2S	Sensitive	m64023e_220409_165810_178981091_ccs	10470	gene						4219	5366	-	CC2S_00000700				ALOMY2G20844
CC2S	Sensitive	m64023e_220409_165810_95094250_ccs	9941	gene						5095	7113	+	CC2S_00000753				ALOMY2G20844
CC2S	Sensitive	m64023e_220409_165810_20055435_ccs	9791	gene						120	2715	-	CC2S_00000765				ALOMY2G20844
CC2S	Sensitive	m64023e_220409_165810_134023607_ccs	9750	gene						1885	3061	-	CC2S_00000773				ALOMY2G20844
CC2S	Sensitive	m64023e_220409_165810_134023607_ccs	9750	gene						3267	3659	-	CC2S_00000774				ALOMY2G20844
CC2S	Sensitive	m64023e_220409_165810_43583751_ccs	9621	gene						5712	8727	-	CC2S_00000796				ALOMY2G20844
CC2S	Sensitive	m64023e_220409_165810_73926278_ccs	9330	gene						2812	3154	+	CC2S_00000823				ALOMY2G20844
CC2S	Sensitive	m64023e_220409_165810_73926278_ccs	9330	gene						3167	3394	+	CC2S_00000824				ALOMY2G20844
CC2S	Sensitive	m64023e_220409_165810_72222068_ccs	8996	gene						4466	5155	-	CC2S_00000854				ALOMY2G20844
CC2S	Sensitive	m64023e_220409_165810_72222068_ccs	8996	gene						5163	7431	-	CC2S_00000855				ALOMY2G20844
CC2S	Sensitive	m64023e_220409_165810_49023071_ccs	8943	gene						2340	6267	-	CC2S_00000859				ALOMY2G20844
CC2S	Sensitive	m64023e_220409_165810_178783252_ccs	8607	gene						3390	5347	+	CC2S_00000888				ALOMY2G20844
CC2S	Sensitive	m64023e_220409_165810_121309318_ccs01	8182	gene						4571	7417	-	CC2S_00000932				ALOMY2G20844
CC2S	Sensitive	m64023e_220409_165810_101320402_ccs	7530	gene						1329	2448	-	CC2S_00001000				ALOMY2G20844
CC2S	Sensitive	m64023e_220409_165810_173345066_ccs	7200	gene						95	1515	-	CC2S_00001046				ALOMY2G20844
CC2S	Sensitive	m64023e_220409_165810_173345066_ccs	7200	gene						1516	3619	-	CC2S_00001047				ALOMY2G20844
CC2S	Sensitive	m64023e_220409_165810_58263380_ccs	7080	gene						3	5973	+	CC2S_00001066				ALOMY2G20844
CC2S	Sensitive	m64023e_220409_165810_58263380_ccs	7080	gene						6650	7078	+	CC2S_00001067				ALOMY2G20844
CC2S	Sensitive	m64023e_220409_165810_96404665_ccs	7028	gene						3061	6490	+	CC2S_00001072				ALOMY2G20844
CC2S	Sensitive	m64023e_220409_165810_41877730_ccs	6680	gene						24	1347	+	CC2S_00001116				ALOMY2G20844
CC2S	Sensitive	m64023e_220409_165810_41877730_ccs	6680	gene						1366	1943	+	CC2S_00001117				ALOMY2G20844
CC2S	Sensitive	m64023e_220409_165810_128059921_ccs	6420	gene						2989	5463	-	CC2S_00001141				ALOMY2G20844
CC2S	Sensitive	m64023e_220409_165810_115933981_ccs	6240	gene						1620	3559	-	CC2S_00001149				ALOMY2G20844
CC2S	Sensitive	m64023e_220409_165810_115933981_ccs	6240	gene						3620	4576	-	CC2S_00001150				ALOMY2G20844
CC2S	Sensitive	m64023e_220409_165810_12386479_ccs	5489	gene						982	1176	-	CC2S_00001203				ALOMY2G20844
CC2S	Sensitive	m64023e_220409_165810_12386479_ccs	5489	gene						1918	2547	-	CC2S_00001205				ALOMY2G20844
CC2S	Sensitive	m64023e_220409_165810_97977407_ccs	4722	gene						1623	4394	+	CC2S_00001275				ALOMY2G20844
CC2S	Sensitive	m64023e_220409_165810_178062899_ccs	3184	gene						1686	2000	-	CC2S_00001389				ALOMY2G20844
CC2S	Sensitive	m64023e_220409_165810_147784373_ccs	4410	gene						1118	1759	-	CC2S_00001299				ALOMY2G21076
CC2S	Sensitive	m64023e_220409_165810_9505083_ccs	18150	gene						10754	12193	-	CC2S_00000083	PF00201	UDP-glucoronosyl and UDP-glucosyl transferase	sp|B3TKC8|88F1G_MALDO	ALOMY2G21204
CC2S	Sensitive	m64023e_220409_165810_150274742_ccs	14580	gene						8699	8971	-	CC2S_00000228	PF00164	Ribosomal protein S12/S23	sp|A4GYN8|RR12B_POPTR	ALOMY2G21331
CC2S	Sensitive	m64023e_220409_165810_16515415_ccs	9003	gene						3662	3934	+	CC2S_00000851	PF00164	Ribosomal protein S12/S23	sp|A4GYN8|RR12B_POPTR	ALOMY2G21331
CC2S	Sensitive	m64023e_220409_165810_1313318_ccs	5858	gene						5300	5572	-	CC2S_00001178	PF00164	Ribosomal protein S12/S23	sp|A4GYN8|RR12B_POPTR	ALOMY2G21331
CC2S	Sensitive	m64023e_220409_165810_125569610_ccs01	5340	gene						1827	2666	-	CC2S_00001215	PF00164	Ribosomal protein S12/S23	sp|A4GYN8|RR12B_POPTR	ALOMY2G21331
CC2S	Sensitive	m64023e_220409_165810_125569610_ccs0	5340	gene						2970	3809	-	CC2S_00001218	PF00164	Ribosomal protein S12/S23	sp|A4GYN8|RR12B_POPTR	ALOMY2G21331
CC2S	Sensitive	m64023e_220409_165810_15469010_ccs	857	gene						29	625	-	CC2S_00001459	PF03317	ELF protein		ALOMY2G21335
CC2S	Sensitive	m64023e_220409_165810_63505906_ccs	4732	gene						824	1296	-	CC2S_00001274	PF00403	Heavy-metal-associated domain	sp|Q9SFF7|HIP43_ARATH	ALOMY2G21346
CC2S	Sensitive	m64023e_220409_165810_92078721_ccs	7250	gene						4751	5639	+	CC2S_00001040				ALOMY3G15693		CC2
CC2S	Sensitive	m64023e_220409_165810_81266536_ccs	13006	gene						2524	2757	-	CC2S_00000403				ALOMY2G21532
CC2S	Sensitive	m64023e_220409_165810_114623678_ccs	8520	gene						1922	2677	+	CC2S_00000896				ALOMY2G21556
CC2S	Sensitive	m64023e_220409_165810_112460661_ccs	5326	gene						1184	4340	+	CC2S_00001221	PF05637	galactosyl transferase GMA12/MNN10 family	sp|Q2R2W8|GT6_ORYSJ	ALOMY2G21639
CC2S	Sensitive	m64023e_220409_165810_157616015_ccs	15840	gene						6272	15156	-	CC2S_00000163				ALOMY2G21639
CC2S	Sensitive	m64023e_220409_165810_83429075_ccs	9142	gene						2128	3795	-	CC2S_00000845				ALOMY2G21639
CC2S	Sensitive	m64023e_220409_165810_78776523_ccs	18311	gene						12064	12613	-	CC2S_00000072	PF03947	Ribosomal Proteins L2, C-terminal domain	sp|P11534|RK2_WHEAT	ALOMY2G21925
CC2S	Sensitive	m64023e_220409_165810_89262852_ccs	6720	gene						5194	5896	-	CC2S_00001115	PF00181	Ribosomal Proteins L2, RNA binding domain	sp|A8Y9C8|RK2_LOLPR	ALOMY2G21929
CC2S	Sensitive	m64023e_220409_165810_150274742_ccs	14580	gene						1674	1954	-	CC2S_00000225	PF00276	Ribosomal protein L23	sp|P69668|RK23_HORVU	ALOMY2G21929
CC2S	Sensitive	m64023e_220409_165810_151980711_ccs	9541	gene						3463	3939	+	CC2S_00000803	PF13456	Reverse transcriptase-like		ALOMY2G22082
CC2S	Sensitive	m64023e_220409_165810_14485669_ccs	11190	gene						123	2007	-	CC2S_00000638				ALOMY2G22144
CC2S	Sensitive	m64023e_220409_165810_14485669_ccs	11190	gene						8033	11071	-	CC2S_00000639				ALOMY2G22144
CC2S	Sensitive	m64023e_220409_165810_100731209_ccs	6468	gene						311	1813	-	CC2S_00001139				ALOMY2G22270
CC2S	Sensitive	m64023e_220409_165810_110036605_ccs	18720	gene						3451	3708	-	CC2S_00000059				ALOMY2G22305
CC2S	Sensitive	m64023e_220409_165810_139199958_ccs	14700	gene						586	3846	-	CC2S_00000217				ALOMY2G22309
CC2S	Sensitive	m64023e_220409_165810_90310372_ccs	14220	gene						2296	2502	-	CC2S_00000295				ALOMY2G22418
CC2S	Sensitive	m64023e_220409_165810_97518183_ccs	6159	gene						1597	1785	+	CC2S_00001155				ALOMY2G22418
CC2S	Sensitive	m64023e_220409_165810_104661792_ccs	14515	gene						11169	13416	-	CC2S_00000247	PF16900	Replication protein A OB domain	sp|Q01588|RFA1_XENLA	ALOMY2G22565
CC2S	Sensitive	m64023e_220409_165810_159319035_ccs	4217	gene						3789	4079	+	CC2S_00001314				ALOMY2G22645
CC2S	Sensitive	m64023e_220409_165810_161942029_ccs	17130	gene						6133	6480	+	CC2S_00000101				ALOMY2G22723
CC2S	Sensitive	m64023e_220409_165810_23267814_ccs	7920	gene						76	1827	-	CC2S_00000960				ALOMY2G22755
CC2S	Sensitive	m64023e_220409_165810_161351958_ccs	7020	gene						2872	3072	-	CC2S_00001073				ALOMY2G22755
CC2S	Sensitive	m64023e_220409_165810_175899548_ccs	5640	gene						2193	2481	-	CC2S_00001187				ALOMY2G22802
CC2S	Sensitive	m64023e_220409_165810_393582_ccs01	7949	gene						1022	6916	+	CC2S_00000956	PF02902	Ulp1 protease family, C-terminal catalytic domain		ALOMY2G22830
CC2S	Sensitive	m64023e_220409_165810_159252484_ccs	9840	gene						80	3634	-	CC2S_00000761				ALOMY2G22830
CC2S	Sensitive	m64023e_220409_165810_393582_ccs0	6630	gene						3218	6289	+	CC2S_00001119				ALOMY2G22830
CC2S	Sensitive	m64023e_220409_165810_166659867_ccs	9424	gene						3005	3548	+	CC2S_00000812				ALOMY2G22841
CC2S	Sensitive	m64023e_220409_165810_25167273_ccs	5010	gene						1068	1760	+	CC2S_00001252				ALOMY2G23101
CC2S	Sensitive	m64023e_220409_165810_105251737_ccs	5010	gene						4230	4922	-	CC2S_00001253				ALOMY2G23101
CC2S	Sensitive	m64023e_220409_165810_81199380_ccs	5010	gene						4087	4780	+	CC2S_00001256				ALOMY2G23101
CC2S	Sensitive	m64023e_220409_165810_147916323_ccs01	5010	gene						1627	2319	+	CC2S_00001257				ALOMY2G23101
CC2S	Sensitive	m64023e_220409_165810_18090196_ccs	4980	gene						1698	2390	-	CC2S_00001258				ALOMY2G23101
CC2S	Sensitive	m64023e_220409_165810_92210520_ccs	8125	gene						3023	4005	+	CC2S_00000942	PF00673	ribosomal L5P family C-terminus	sp|P42795|RL111_ARATH	ALOMY2G23120
CC2S	Sensitive	m64023e_220409_165810_126419336_ccs0	3600	gene						137	469	-	CC2S_00001368	PF01907	Ribosomal protein L37e	sp|Q43292|RL372_ARATH	ALOMY2G23343
CC2S	Sensitive	m64023e_220409_165810_145031333_ccs	6870	gene						2976	3149	+	CC2S_00001091				ALOMY2G23368
CC2S	Sensitive	m64023e_220409_165810_44501393_ccs	7559	gene						6479	7241	+	CC2S_00000999				ALOMY2G23389
CC2S	Sensitive	m64023e_220409_165810_86903547_ccs	10503	gene						650	889	-	CC2S_00000698				ALOMY2G23521
CC2S	Sensitive	m64023e_220409_165810_19137307_ccs	8190	gene						782	1393	+	CC2S_00000929	PF13456	Reverse transcriptase-like		ALOMY2G23651
CC2S	Sensitive	m64023e_220409_165810_160367827_ccs	17220	gene						10116	10759	-	CC2S_00000100	PF03478	Protein of unknown function (DUF295)		ALOMY2G23685
CC2S	Sensitive	m64023e_220409_165810_128584395_ccs	5708	gene						2552	2695	+	CC2S_00001185				ALOMY2G23705
CC2S	Sensitive	m64023e_220409_165810_42665292_ccs	16620	gene						6876	7939	+	CC2S_00000126	PF13920	Zinc finger, C3HC4 type (RING finger)	sp|Q96EX2|RNFT2_HUMAN	ALOMY2G23746
CC2S	Sensitive	m64023e_220409_165810_42665292_ccs	16620	gene						4547	6871	+	CC2S_00000125				ALOMY2G23746
CC2S	Sensitive	m64023e_220409_165810_48499078_ccs	4456	gene						2812	3165	-	CC2S_00001298				ALOMY2G23825
CC2S	Sensitive	m64023e_220409_165810_106432997_ccs	4939	gene						3449	4280	-	CC2S_00001263	PF05056	Protein of unknown function (DUF674)		ALOMY2G23953
CC2S	Sensitive	m64023e_220409_165810_11273669_ccs	9409	gene						1327	1800	+	CC2S_00000814	PF08263	Leucine rich repeat N-terminal domain	sp|C0LGT6|EFR_ARATH	ALOMY2G23958
CC2S	Sensitive	m64023e_220409_165810_33489741_ccs	8464	gene						3305	3580	-	CC2S_00000898				ALOMY2G24023
CC2S	Sensitive	m64023e_220409_165810_149030379_ccs	14460	gene						28	420	-	CC2S_00000249			sp|Q0D5R2|CRK10_ORYSJ	ALOMY2G24038
CC2S	Sensitive	m64023e_220409_165810_149030379_ccs	14460	gene						543	1400	-	CC2S_00000250			sp|Q0D5R2|CRK10_ORYSJ	ALOMY2G24038
CC2S	Sensitive	m64023e_220409_165810_149030379_ccs	14460	gene						2722	3517	-	CC2S_00000252			sp|Q0D5R2|CRK10_ORYSJ	ALOMY2G24038
CC2S	Sensitive	m64023e_220409_165810_149030379_ccs	14460	gene						5849	6485	-	CC2S_00000255	PF00069	Protein kinase domain	sp|Q0D5R3|CRK6_ORYSJ	ALOMY2G24038
CC2S	Sensitive	m64023e_220409_165810_33488899_ccs	12690	gene						9455	11661	-	CC2S_00000454	PF00651	BTB/POZ domain	sp|O22286|BPM3_ARATH	ALOMY2G24113
CC2S	Sensitive	m64023e_220409_165810_118293933_ccs	13370	gene						168	323	-	CC2S_00000375				ALOMY2G24277
CC2S	Sensitive	m64023e_220409_165810_49940481_ccs	13678	gene						12389	13537	+	CC2S_00000353	PF00646	F-box domain		ALOMY2G24438
CC2S	Sensitive	m64023e_220409_165810_91029772_ccs	7440	gene						2355	4897	-	CC2S_00001012	PF07714	Protein tyrosine and serine/threonine kinase	sp|Q9M2S4|LRKS4_ARATH	ALOMY2G24467
CC2S	Sensitive	m64023e_220409_165810_50857872_ccs0101	8770	gene						3345	5339	+	CC2S_00000871	PF02458	Transferase family	sp|Q5SMM6|HCT4_ORYSJ	ALOMY2G24468
CC2S	Sensitive	m64023e_220409_165810_149094721_ccs	4620	gene						170	1750	-	CC2S_00001283	PF03464	eRF1 domain 2	sp|Q9LPV8|ERF1Y_ARATH	ALOMY5G33943		CC5
CC2S	Sensitive	m64023e_220409_165810_9505083_ccs	18150	gene						1703	2407	-	CC2S_00000082				ALOMY2G24538
CC2S	Sensitive	m64023e_220409_165810_102959277_ccs	15360	gene						12127	12826	-	CC2S_00000186				ALOMY2G24538
CC2S	Sensitive	m64023e_220409_165810_92145115_ccs	14910	gene						3875	4368	+	CC2S_00000213				ALOMY2G24538
CC2S	Sensitive	m64023e_220409_165810_131925617_ccs	9027	gene						4635	5340	-	CC2S_00000849				ALOMY2G24538
CC2S	Sensitive	m64023e_220409_165810_53938546_ccs0	7890	gene						5921	6616	-	CC2S_00000963				ALOMY2G24538
CC2S	Sensitive	m64023e_220409_165810_9046318_ccs	7126	gene						5534	7114	+	CC2S_00001055				ALOMY2G24538
CC2S	Sensitive	m64023e_220409_165810_78842458_ccs	4347	gene						3650	4346	+	CC2S_00001304				ALOMY2G24538
CC2S	Sensitive	m64023e_220409_165810_158466130_ccs	4258	gene						3393	4089	+	CC2S_00001312				ALOMY2G24538
CC2S	Sensitive	m64023e_220409_165810_175966943_ccs	8162	gene						4022	4267	+	CC2S_00000936			sp|Q8H8V7|AB5G_ORYSJ	ALOMY2G24611
CC2S	Sensitive	m64023e_220409_165810_36046240_ccs	7380	gene						1388	2732	-	CC2S_00001019	PF03145	Seven in absentia protein family	sp|Q9FKD9|SINL6_ARATH	ALOMY2G24856
CC2S	Sensitive	m64023e_220409_165810_178259686_ccs	7800	gene						2261	2942	-	CC2S_00000968	PF02458	Transferase family	sp|Q9ZWR8|ANTA_GENTR	ALOMY6G43236		CC5
CC2S	Sensitive	m64023e_220409_165810_94962195_ccs	17969	gene						11255	13797	-	CC2S_00000087	PF01693	Caulimovirus viroplasmin	sp|Q9KEI9|RNH1_BACHD	ALOMY3G10110
CC2S	Sensitive	m64023e_220409_165810_117049475_ccs	8304	gene						5300	5542	+	CC2S_00000922	PF01693	Caulimovirus viroplasmin	sp|Q9KEI9|RNH1_BACHD	ALOMY3G10110
CC2S	Sensitive	m64023e_220409_165810_145425586_ccs	2293	gene						1158	1400	+	CC2S_00001426	PF01693	Caulimovirus viroplasmin	sp|Q9KEI9|RNH1_BACHD	ALOMY3G10110
CC2S	Sensitive	m64023e_220409_165810_143853315_ccs	9292	gene						1630	3835	+	CC2S_00000828	PF01086	Clathrin light chain	sp|Q7XKE9|CLC1_ORYSJ	ALOMY3G10190
CC2S	Sensitive	m64023e_220409_165810_143853315_ccs	9292	gene						4343	6357	-	CC2S_00000829	PF07714	Protein tyrosine and serine/threonine kinase	sp|Q9FXF2|RKF1_ARATH	ALOMY3G10191
CC2S	Sensitive	m64023e_220409_165810_37554559_ccs0	7380	gene						6741	7106	+	CC2S_00001018				ALOMY3G10223
CC2S	Sensitive	m64023e_220409_165810_164955636_ccs01	11593	gene						4733	4987	-	CC2S_00000587				ALOMY3G10431
CC2S	Sensitive	m64023e_220409_165810_40042718_ccs	9324	gene						297	1062	-	CC2S_00000826				ALOMY3G10479
CC2S	Sensitive	m64023e_220409_165810_98437004_ccs01	7144	gene						34	276	-	CC2S_00001052				ALOMY3G10479
CC2S	Sensitive	m64023e_220409_165810_72615478_ccs	12870	gene						2316	3313	+	CC2S_00000429	PF00141	Peroxidase	sp|Q96520|PER12_ARATH	ALOMY3G10522
CC2S	Sensitive	m64023e_220409_165810_108069337_ccs	12840	gene						7106	8131	+	CC2S_00000432	PF06839	GRF zinc finger		ALOMY3G10580
CC2S	Sensitive	m64023e_220409_165810_45941612_ccs	15990	gene						6125	6406	+	CC2S_00000161				ALOMY3G11116
CC2S	Sensitive	m64023e_220409_165810_89065180_ccs	17910	gene						12399	16685	-	CC2S_00000088	PF14226	non-haem dioxygenase in morphine synthesis N-terminal	sp|C8VK14|HXNY_EMENI	ALOMY3G11202
CC2S	Sensitive	m64023e_220409_165810_124061420_ccs	9390	gene						4883	5065	-	CC2S_00000819	PF00583	Acetyltransferase (GNAT) family	sp|Q9FKI4|NAA10_ARATH	ALOMY3G11281	TR
CC2S	Sensitive	m64023e_220409_165810_118556395_ccs	5934	gene						3053	3316	-	CC2S_00001168				ALOMY3G11424
CC2S	Sensitive	m64023e_220409_165810_32638670_ccs	9480	gene						2511	3264	-	CC2S_00000809				ALOMY3G11577
CC2S	Sensitive	m64023e_220409_165810_3212116_ccs	13278	gene						3414	12897	-	CC2S_00000385	PF00689	Cation transporting ATPase, C-terminus	sp|Q7X8B5|ACA5_ORYSJ	ALOMY3G11925
CC2S	Sensitive	m64023e_220409_165810_155256697_ccs	11250	gene						6381	7876	-	CC2S_00000630	PF01786	Alternative oxidase	sp|O82807|AOX1A_ORYSJ	ALOMY3G11979
CC2S	Sensitive	m64023e_220409_165810_166789887_ccs	7789	gene						6278	6514	+	CC2S_00000972				ALOMY3G12142
CC2S	Sensitive	m64023e_220409_165810_86443555_ccs	9743	gene						6461	9014	+	CC2S_00000777	PF04690	YABBY protein	sp|Q0JBF0|YAB5_ORYSJ	ALOMY3G12579	TF
CC2S	Sensitive	m64023e_220409_165810_67568582_ccs	10669	gene						9626	10204	-	CC2S_00000685				ALOMY3G12624
CC2S	Sensitive	m64023e_220409_165810_9372701_ccs	7350	gene						317	520	+	CC2S_00001021				ALOMY3G12624
CC2S	Sensitive	m64023e_220409_165810_47580752_ccs	7380	gene						6819	7265	-	CC2S_00001016				ALOMY3G12923
CC2S	Sensitive	m64023e_220409_165810_96078302_ccs	12750	gene						6563	9048	+	CC2S_00000438	PF13880	ESCO1/2 acetyl-transferase	sp|A7UL74|CTF7_ARATH	ALOMY3G12941
CC2S	Sensitive	m64023e_220409_165810_61932287_ccs	14153	gene						13605	13880	-	CC2S_00000304				ALOMY3G12959
CC2S	Sensitive	m64023e_220409_165810_26476991_ccs	6930	gene						953	4002	+	CC2S_00001078			sp|B5UBC1|PIKM1_ORYSJ	ALOMY3G13216
CC2S	Sensitive	m64023e_220409_165810_45221886_ccs	8190	gene						1707	3099	-	CC2S_00000930	PF14416	PMR5 N terminal Domain	sp|Q9LRS2|TBL22_ARATH	ALOMY3G13245
CC2S	Sensitive	m64023e_220409_165810_128649104_ccs	8401	gene						628	2871	-	CC2S_00000902	PF01490	Transmembrane amino acid transporter protein	sp|Q9FKS8|LHT1_ARATH	ALOMY3G13274
CC2S	Sensitive	m64023e_220409_165810_38404516_ccs	10949	gene						2583	2984	+	CC2S_00000663				ALOMY3G13302
CC2S	Sensitive	m64023e_220409_165810_159712681_ccs	4740	gene						719	4029	+	CC2S_00001273	PF13365	Trypsin-like peptidase domain	sp|Q9LU10|DEGP8_ARATH	ALOMY3G13311
CC2S	Sensitive	m64023e_220409_165810_164432282_ccs	5246	gene						2151	3247	-	CC2S_00001231			sp|Q56WL5|ZPR4_ARATH	ALOMY3G13735
CC2S	Sensitive	m64023e_220409_165810_158860592_ccs	12150	gene						7670	8448	-	CC2S_00000516				ALOMY3G13763
CC2S	Sensitive	m64023e_220409_165810_118556589_ccs0	6510	gene						427	4551	-	CC2S_00001130	PF00223	Photosystem I psaA/psaB protein	sp|Q8S8X5|PSAB_ATRBE	ALOMY3G13830
CC2S	Sensitive	m64023e_220409_165810_36177412_ccs	7080	gene						2177	2587	-	CC2S_00001065				ALOMY3G13888
CC2S	Sensitive	m64023e_220409_165810_169411932_ccs01	3659	gene						2791	3314	-	CC2S_00001364				ALOMY3G13895
CC2S	Sensitive	m64023e_220409_165810_99878910_ccs01	15630	gene						3028	3662	-	CC2S_00000178	PF12776	Myb/SANT-like DNA-binding domain	sp|Q9FFJ8|LIMYB_ARATH	ALOMY3G14211
CC2S	Sensitive	m64023e_220409_165810_93849979_ccs	3583	gene						1478	2276	-	CC2S_00001371	PF01789	PsbP	sp|Q00434|PSBP_WHEAT	ALOMY3G14272
CC2S	Sensitive	m64023e_220409_165810_69141605_ccs	3570	gene						59	1648	+	CC2S_00001372	PF00329	Respiratory-chain NADH dehydrogenase, 30 Kd subunit	sp|A8Y9H4|NDHK_LOLPR	ALOMY3G14315
CC2S	Sensitive	m64023e_220409_165810_23332605_ccs	8539	gene						635	2655	+	CC2S_00000895	PF00329	Respiratory-chain NADH dehydrogenase, 30 Kd subunit	sp|P0C343|NDHK_ORYSJ	ALOMY3G14315
CC2S	Sensitive	m64023e_220409_165810_120784848_ccs	14205	gene						538	1638	+	CC2S_00000296	PF00329	Respiratory-chain NADH dehydrogenase, 30 Kd subunit	sp|Q95H60|NDHJ_WHEAT	ALOMY3G14315
CC2S	Sensitive	m64023e_220409_165810_50595071_ccs	12510	gene						1739	2839	-	CC2S_00000483	PF00329	Respiratory-chain NADH dehydrogenase, 30 Kd subunit	sp|Q95H60|NDHJ_WHEAT	ALOMY3G14315
CC2S	Sensitive	m64023e_220409_165810_16714263_ccs	6090	gene						5204	6086	-	CC2S_00001160	PF00329	Respiratory-chain NADH dehydrogenase, 30 Kd subunit	sp|Q95H60|NDHJ_WHEAT	ALOMY3G14315
CC2S	Sensitive	m64023e_220409_165810_126487382_ccs	3690	gene						2833	3658	-	CC2S_00001360	PF00329	Respiratory-chain NADH dehydrogenase, 30 Kd subunit	sp|Q95H60|NDHJ_WHEAT	ALOMY3G14315
CC2S	Sensitive	m64023e_220409_165810_143788406_ccs	3330	gene						2024	3124	-	CC2S_00001385	PF00329	Respiratory-chain NADH dehydrogenase, 30 Kd subunit	sp|Q95H60|NDHJ_WHEAT	ALOMY3G14315
CC2S	Sensitive	m64023e_220409_165810_93652550_ccs	6991	gene						1810	3761	-	CC2S_00001075				ALOMY3G14420
CC2S	Sensitive	m64023e_220409_165810_151980711_ccs	9541	gene						304	555	+	CC2S_00000802				ALOMY3G14546
CC2S	Sensitive	m64023e_220409_165810_51644366_ccs	4893	gene						3295	4512	+	CC2S_00001265				ALOMY3G14588
CC2S	Sensitive	m64023e_220409_165810_86443555_ccs	9743	gene						1667	2035	+	CC2S_00000775				ALOMY3G14597
CC2S	Sensitive	m64023e_220409_165810_50595071_ccs	12510	gene						9430	11959	-	CC2S_00000486	PF02392	Ycf4	sp|A8Y9I0|YCF4_LOLPR	ALOMY3G14791
CC2S	Sensitive	m64023e_220409_165810_59508232_ccs	9180	gene						1273	1955	+	CC2S_00000837	PF02392	Ycf4	sp|A8Y9I0|YCF4_LOLPR	ALOMY3G14791
CC2S	Sensitive	m64023e_220409_165810_9111972_ccs0	3300	gene						168	353	-	CC2S_00001386	PF02392	Ycf4	sp|A8Y9I0|YCF4_LOLPR	ALOMY3G14791
CC2S	Sensitive	m64023e_220409_165810_83757149_ccs	5580	gene						5267	5543	+	CC2S_00001195	PF03040	CemA family	sp|A8Y9I1|CEMA_LOLPR	ALOMY3G14792
CC2S	Sensitive	m64023e_220409_165810_197345_ccs	8340	gene						4571	7584	+	CC2S_00000912				ALOMY3G14944
CC2S	Sensitive	m64023e_220409_165810_103546904_ccs	7657	gene						2753	5635	-	CC2S_00000986				ALOMY3G15000
CC2S	Sensitive	m64023e_220409_165810_103940945_ccs	16272	gene						8727	16062	+	CC2S_00000148	PF07732	Multicopper oxidase	sp|P29162|ASOL_TOBAC	ALOMY3G15017
CC2S	Sensitive	m64023e_220409_165810_67568582_ccs	10669	gene						10205	10632	-	CC2S_00000686				ALOMY3G15123
CC2S	Sensitive	m64023e_220409_165810_139987730_ccs	6780	gene						1510	2375	+	CC2S_00001103	PF12776	Myb/SANT-like DNA-binding domain		ALOMY3G15133
CC2S	Sensitive	m64023e_220409_165810_126419686_ccs	15504	gene						12672	13650	-	CC2S_00000183	PF13456	Reverse transcriptase-like		ALOMY3G15139
CC2S	Sensitive	m64023e_220409_165810_3212116_ccs	13278	gene						2255	2754	+	CC2S_00000384	PF13456	Reverse transcriptase-like		ALOMY3G15139
CC2S	Sensitive	m64023e_220409_165810_167708519_ccs	12352	gene						9548	9799	-	CC2S_00000502	PF13456	Reverse transcriptase-like		ALOMY3G15139
CC2S	Sensitive	m64023e_220409_165810_170395461_ccs	5130	gene						2434	3201	+	CC2S_00001239	PF13456	Reverse transcriptase-like		ALOMY3G15139
CC2S	Sensitive	m64023e_220409_165810_149424972_ccs	5126	gene						3951	5091	-	CC2S_00001241	PF13456	Reverse transcriptase-like		ALOMY3G15139
CC2S	Sensitive	m64023e_220409_165810_149030379_ccs	14460	gene						1665	2466	-	CC2S_00000251	PF00069	Protein kinase domain	sp|Q0D5R2|CRK10_ORYSJ	ALOMY3G15220
CC2S	Sensitive	m64023e_220409_165810_149030379_ccs	14460	gene						4544	5490	-	CC2S_00000254			sp|Q0D5R2|CRK10_ORYSJ	ALOMY3G15220
CC2S	Sensitive	m64023e_220409_165810_149030379_ccs	14460	gene						3813	4366	-	CC2S_00000253	PF00069	Protein kinase domain	sp|Q0D5R3|CRK6_ORYSJ	ALOMY3G15220
CC2S	Sensitive	m64023e_220409_165810_66257499_ccs	12420	gene						4842	5681	-	CC2S_00000489				ALOMY3G15381
CC2S	Sensitive	m64023e_220409_165810_171442298_ccs	12852	gene						6587	10257	-	CC2S_00000431				ALOMY3G15449
CC2S	Sensitive	m64023e_220409_165810_38406622_ccs0	10020	gene						9599	9949	-	CC2S_00000745	PF08100	Dimerisation domain	sp|Q6EPG8|ASMT1_ORYSJ	ALOMY3G15634
CC2S	Sensitive	m64023e_220409_165810_85592381_ccs	22860	gene						10073	11276	-	CC2S_00000008	PF00403	Heavy-metal-associated domain	sp|Q9SZC9|HMA6_ARATH	ALOMY3G15789
CC2S	Sensitive	m64023e_220409_165810_65604338_ccs0	870	gene						183	870	-	CC2S_00001458			sp|Q09893|YAI5_SCHPO	ALOMY3G15885
CC2S	Sensitive	m64023e_220409_165810_41748042_ccs	4165	gene						2595	3284	+	CC2S_00001325	PF01612	3'-5' exonuclease	sp|Q84LH3|WEX_ARATH	ALOMY3G15979
CC2S	Sensitive	m64023e_220409_165810_85265002_ccs	11265	gene						7207	7779	-	CC2S_00000629	PF13456	Reverse transcriptase-like		ALOMY3G15987
CC2S	Sensitive	m64023e_220409_165810_143853315_ccs	9292	gene						8600	8962	+	CC2S_00000830	PF13456	Reverse transcriptase-like		ALOMY3G16171
CC2S	Sensitive	m64023e_220409_165810_135594056_ccs	4170	gene						3	415	-	CC2S_00001320				ALOMY3G16237
CC2S	Sensitive	m64023e_220409_165810_9896118_ccs0	5190	gene						4535	5146	+	CC2S_00001234	PF00562	RNA polymerase Rpb2, domain 6	sp|A1E9Z8|RPOB_AGRST	ALOMY3G16310
CC2S	Sensitive	m64023e_220409_165810_71697573_ccs	3370	gene						807	2166	+	CC2S_00001383				ALOMY3G16553
CC2S	Sensitive	m64023e_220409_165810_42402719_ccs	2836	gene						901	2290	+	CC2S_00001406	PF17766	Fibronectin type-III domain	sp|A9QY40|SBT1_LOTJA	ALOMY3G16664
CC2S	Sensitive	m64023e_220409_165810_30542248_ccs	10045	gene						7999	8643	+	CC2S_00000742				ALOMY3G16832
CC2S	Sensitive	m64023e_220409_165810_138676010_ccs	9690	gene						5150	7055	-	CC2S_00000787				ALOMY3G16843
CC2S	Sensitive	m64023e_220409_165810_138676010_ccs	9690	gene						7094	7430	-	CC2S_00000788				ALOMY3G16843
CC2S	Sensitive	m64023e_220409_165810_101255957_ccs	4536	gene						1772	2640	+	CC2S_00001288				ALOMY3G16847
CC2S	Sensitive	m64023e_220409_165810_64686789_ccs	5160	gene						2264	2627	+	CC2S_00001237				ALOMY3G16964
CC2S	Sensitive	m64023e_220409_165810_51382894_ccs	7908	gene						6431	7701	-	CC2S_00000962	PF01490	Transmembrane amino acid transporter protein	sp|F4HW02|GAT1_ARATH	ALOMY3G16969
CC2S	Sensitive	m64023e_220409_165810_25757155_ccs	8220	gene						19	8202	-	CC2S_00000924	PF16639	Apocytochrome F, N-terminal	sp|A1EA21|CYF_AGRST	ALOMY3G17219
CC2S	Sensitive	m64023e_220409_165810_116196490_ccs	10710	gene						9624	10128	+	CC2S_00000677				ALOMY3G17350
CC2S	Sensitive	m64023e_220409_165810_91490064_ccs	2742	gene						318	818	+	CC2S_00001410	PF00072	Response regulator receiver domain	sp|Q7XN30|ORR42_ORYSJ	ALOMY3G17362	TR
CC2S	Sensitive	m64023e_220409_165810_48759971_ccs0	6780	gene						813	1247	+	CC2S_00001105				ALOMY3G17372
CC2S	Sensitive	m64023e_220409_165810_172099605_ccs	5612	gene						2254	2538	+	CC2S_00001189				ALOMY3G17531
CC2S	Sensitive	m64023e_220409_165810_7865647_ccs	5970	gene						5404	5872	-	CC2S_00001165				ALOMY4G25477
CC2S	Sensitive	m64023e_220409_165810_55249302_ccs	23310	gene						18046	19574	-	CC2S_00000006				ALOMY4G25483
CC2S	Sensitive	m64023e_220409_165810_105711224_ccs	11357	gene						9029	9874	-	CC2S_00000620				ALOMY4G25580
CC2S	Sensitive	m64023e_220409_165810_65930889_ccs	14160	gene						7264	9455	+	CC2S_00000301	PF00646	F-box domain	sp|Q9SFC7|FB135_ARATH	ALOMY4G25629
CC2S	Sensitive	m64023e_220409_165810_111870262_ccs	5895	gene						5070	5315	+	CC2S_00001172	PF00651	BTB/POZ domain	sp|Q8L765|BPM1_ARATH	ALOMY4G25642
CC2S	Sensitive	m64023e_220409_165810_103284742_ccs	3840	gene						70	2308	+	CC2S_00001350	PF02338	OTU-like cysteine protease	sp|Q8LBW2|OTU9_ARATH	ALOMY4G25780
CC2S	Sensitive	m64023e_220409_165810_139724916_ccs	6630	gene						5312	5711	-	CC2S_00001118				ALOMY4G25999
CC2S	Sensitive	m64023e_220409_165810_167772262_ccs	5400	gene						4366	4892	-	CC2S_00001212				ALOMY4G25999
CC2S	Sensitive	m64023e_220409_165810_75172612_ccs	5042	gene						2032	4717	-	CC2S_00001246				ALOMY4G26060
CC2S	Sensitive	m64023e_220409_165810_169609796_ccs	4980	gene						1589	2335	-	CC2S_00001259				ALOMY4G26060
CC2S	Sensitive	m64023e_220409_165810_50856237_ccs	2947	gene						2227	2508	+	CC2S_00001400				ALOMY4G26212
CC2S	Sensitive	m64023e_220409_165810_112855440_ccs	22350	gene						17135	22228	-	CC2S_00000010	PF02705	K+ potassium transporter	sp|Q84MS3|HAK16_ORYSJ	ALOMY4G26275
CC2S	Sensitive	m64023e_220409_165810_136710084_ccs	12242	gene						4975	5850	-	CC2S_00000511				ALOMY4G26296
CC2S	Sensitive	m64023e_220409_165810_158860592_ccs	12150	gene						4452	4921	+	CC2S_00000514	PF00883	Cytosol aminopeptidase family, catalytic domain	sp|Q6K669|AMPL2_ORYSJ	ALOMY4G26352
CC2S	Sensitive	m64023e_220409_165810_158860592_ccs	12150	gene						4942	5938	+	CC2S_00000515	PF00883	Cytosol aminopeptidase family, catalytic domain	sp|Q6K669|AMPL2_ORYSJ	ALOMY4G26352
CC2S	Sensitive	m64023e_220409_165810_98762909_ccs	4260	gene						149	1543	-	CC2S_00001310	PF02536	mTERF	sp|Q6AUK6|MTEF4_ORYSJ	ALOMY4G26361	TR
CC2S	Sensitive	m64023e_220409_165810_105121325_ccs01	4677	gene						1234	3210	+	CC2S_00001277	PF00076	RNA recognition motif. (a.k.a. RRM, RBD, or RNP domain)	sp|Q6GL69|MK67I_XENTR	ALOMY4G26454
CC2S	Sensitive	m64023e_220409_165810_95881588_ccs01	2895	gene						159	635	-	CC2S_00001402				ALOMY4G26580
CC2S	Sensitive	m64023e_220409_165810_95881588_ccs0	1440	gene						324	1337	-	CC2S_00001452				ALOMY4G26580
CC2S	Sensitive	m64023e_220409_165810_24904866_ccs	3043	gene						161	522	+	CC2S_00001393			sp|Q37066|YCF73_ORYSJ	ALOMY4G26983
CC2S	Sensitive	m64023e_220409_165810_82247986_ccs	13539	gene						11901	12472	-	CC2S_00000361				ALOMY4G27045
CC2S	Sensitive	m64023e_220409_165810_44761721_ccs	12011	gene						5266	6869	+	CC2S_00000538	PF06203	CCT motif	sp|Q9FDX8|HD1_ORYSJ	ALOMY4G27083	TF
CC2S	Sensitive	m64023e_220409_165810_44761721_ccs	12011	gene						8043	10446	-	CC2S_00000539	PF03798	TLC domain	sp|Q6YWS8|ASCL2_ORYSJ	ALOMY4G27084
CC2S	Sensitive	m64023e_220409_165810_61211630_ccs	10560	gene						1896	2602	+	CC2S_00000693				ALOMY4G27152
CC2S	Sensitive	m64023e_220409_165810_139069372_ccs	13290	gene						10087	13031	+	CC2S_00000381				ALOMY4G27242
CC2S	Sensitive	m64023e_220409_165810_15272403_ccs	9625	gene						315	9182	-	CC2S_00000795	PF00082	Subtilase family	sp|Q6ESI7|TPPII_ORYSJ	ALOMY4G27350
CC2S	Sensitive	m64023e_220409_165810_135594056_ccs	4170	gene						1131	2533	-	CC2S_00001321				ALOMY4G27426
CC2S	Sensitive	m64023e_220409_165810_110364533_ccs	19320	gene						8738	9305	-	CC2S_00000037	PF04043	Plant invertase/pectin methylesterase inhibitor	sp|Q8GT41|PLA1_PLAAC	ALOMY4G27512
CC2S	Sensitive	m64023e_220409_165810_130482551_ccs	7680	gene						543	2292	+	CC2S_00000981				ALOMY4G27579
CC2S	Sensitive	m64023e_220409_165810_130482551_ccs	7680	gene						4300	4497	+	CC2S_00000982				ALOMY4G27580
CC2S	Sensitive	m64023e_220409_165810_130482551_ccs	7680	gene						4583	5331	+	CC2S_00000983				ALOMY4G27580
CC2S	Sensitive	m64023e_220409_165810_130482551_ccs	7680	gene						5533	6166	+	CC2S_00000984				ALOMY4G27580
CC2S	Sensitive	m64023e_220409_165810_130482551_ccs	7680	gene						6792	7413	+	CC2S_00000985				ALOMY4G27580
CC2S	Sensitive	m64023e_220409_165810_93194573_ccs	15680	gene						4128	11409	+	CC2S_00000167	PF00037	4Fe-4S binding domain	sp|Q8LPJ4|AB2E_ARATH	ALOMY4G27705
CC2S	Sensitive	m64023e_220409_165810_17107208_ccs0	1110	gene						590	829	-	CC2S_00001455				ALOMY4G27918
CC2S	Sensitive	m64023e_220409_165810_81921563_ccs	13410	gene						3451	3762	+	CC2S_00000371				ALOMY4G28043
CC2S	Sensitive	m64023e_220409_165810_30542248_ccs	10045	gene						8706	8942	+	CC2S_00000743				ALOMY4G28089
CC2S	Sensitive	m64023e_220409_165810_13109809_ccs	14880	gene						3134	4198	+	CC2S_00000215	PF14111	Domain of unknown function (DUF4283)		ALOMY4G28313
CC2S	Sensitive	m64023e_220409_165810_114623748_ccs	12787	gene						6643	7121	-	CC2S_00000436				ALOMY4G28317
CC2S	Sensitive	m64023e_220409_165810_15599343_ccs	10916	gene						6974	7222	-	CC2S_00000667				ALOMY4G28359
CC2S	Sensitive	m64023e_220409_165810_145490963_ccs	5970	gene						222	2988	-	CC2S_00001164				ALOMY4G28392
CC2S	Sensitive	m64023e_220409_165810_166724875_ccs	2970	gene						1093	1641	+	CC2S_00001398				ALOMY4G28440
[truncated: 3,914 more rows]

## Sheet: S3
Supplementary Table 3. Venn diagram result summary for herbicide resistant eccDNAs with annoation
[truncated: 613 more rows]

[truncated: 10 more sheets: S4, S5, S6, S7, S8, S9, S10, S11, S12, S13]
